# Supplementary material for: Multi-Step In Silico Discovery of Natural Drugs against COVID-19 Targeting Main Protease
Source: MDPI journal article supplement (doi:10.3390/ijms23136912), 2022-06-21
Supplement: s1 [file s1]

## Supporting Data

# Multi-Step *in Silico* Discovery of Natural Drugs against COVID-19 Targeting Main Protease

Eslam B. Elkaeed <sup>1</sup>, Fadia S.Youssef<sup>2</sup>, Ibrahim. H. Eissa <sup>3</sup>, Hazem Elkady <sup>3</sup> Aisha A. Als fouk<sup>4</sup>, Mohamed L. Ashour <sup>2,5</sup>, Mahmoud A. El Hassab<sup>6</sup>, Sahar M. Abou-Seri <sup>7\*</sup> and Ahmed M. Metwaly<sup>8,9\*</sup>

<sup>1</sup> Department of Pharmaceutical Sciences, College of Pharmacy, AlMaarefa University, Riyadh 13713, Saudi Arabia

<sup>2</sup>Department of Pharmacognosy, Faculty of Pharmacy, Ain-Shams University, Abbasia, Cairo 11566, Egypt

<sup>3</sup> Pharmaceutical Medicinal Chemistry & Drug Design Department, Faculty of Pharmacy (Boys), Al-Azhar University, Cairo11884, Egypt

<sup>4</sup> Department of Pharmaceutical Sciences, College of Pharmacy, Princess Nourah bint Abdulrahman University, P.O. Box 84428, Riyadh 11671, Saudi Arabia

<sup>5</sup>Department of Pharmaceutical Sciences, Pharmacy Program, Batterjee Medical College, Jeddah 21442, Saudi Arabia

<sup>6</sup> Department of Pharmaceutical Chemistry, Faculty of Pharmacy, King Salman International University (KSIU), Ras Sudr City, South Sinai, Egypt

<sup>7</sup> Department of Pharmaceutical Chemistry, Faculty of Pharmacy, Cairo University, Kasr El-Aini Street, Cairo, P.O. Box 11562, Egypt.

<sup>8</sup> Pharmacognosy and Medicinal Plants Department, Faculty of Pharmacy (Boys), Al-Azhar University, Cairo 11884, Egypt

<sup>9</sup> Biopharmaceutical Product Research Department, Genetic Engineering and Biotechnology Research Institute, City of Scientific Research and Technological Applications, Alexandria, Egypt

\*Correspondence: ametwaly@azhar.edu.eg, sahar.shaarawy@pharma.cu.edu.eg

## Content

|                                                                                                                                  |                      |
|----------------------------------------------------------------------------------------------------------------------------------|----------------------|
| Figure S1. Chemical structures of the examined natural antiviral compounds                                                       |                      |
| Figures S2-S6 (The binding modes of compounds <b>128</b> , <b>156</b> , <b>180</b> , <b>203</b> , and <b>204</b> , respectively. |                      |
| Method                                                                                                                           | Molecular Similarity |
|                                                                                                                                  | Fingerprint          |
|                                                                                                                                  | Docking studies      |
|                                                                                                                                  | Toxicity studies     |
|                                                                                                                                  | MDE studies          |
| Toxicity report                                                                                                                  |                      |

# Chemical Structures

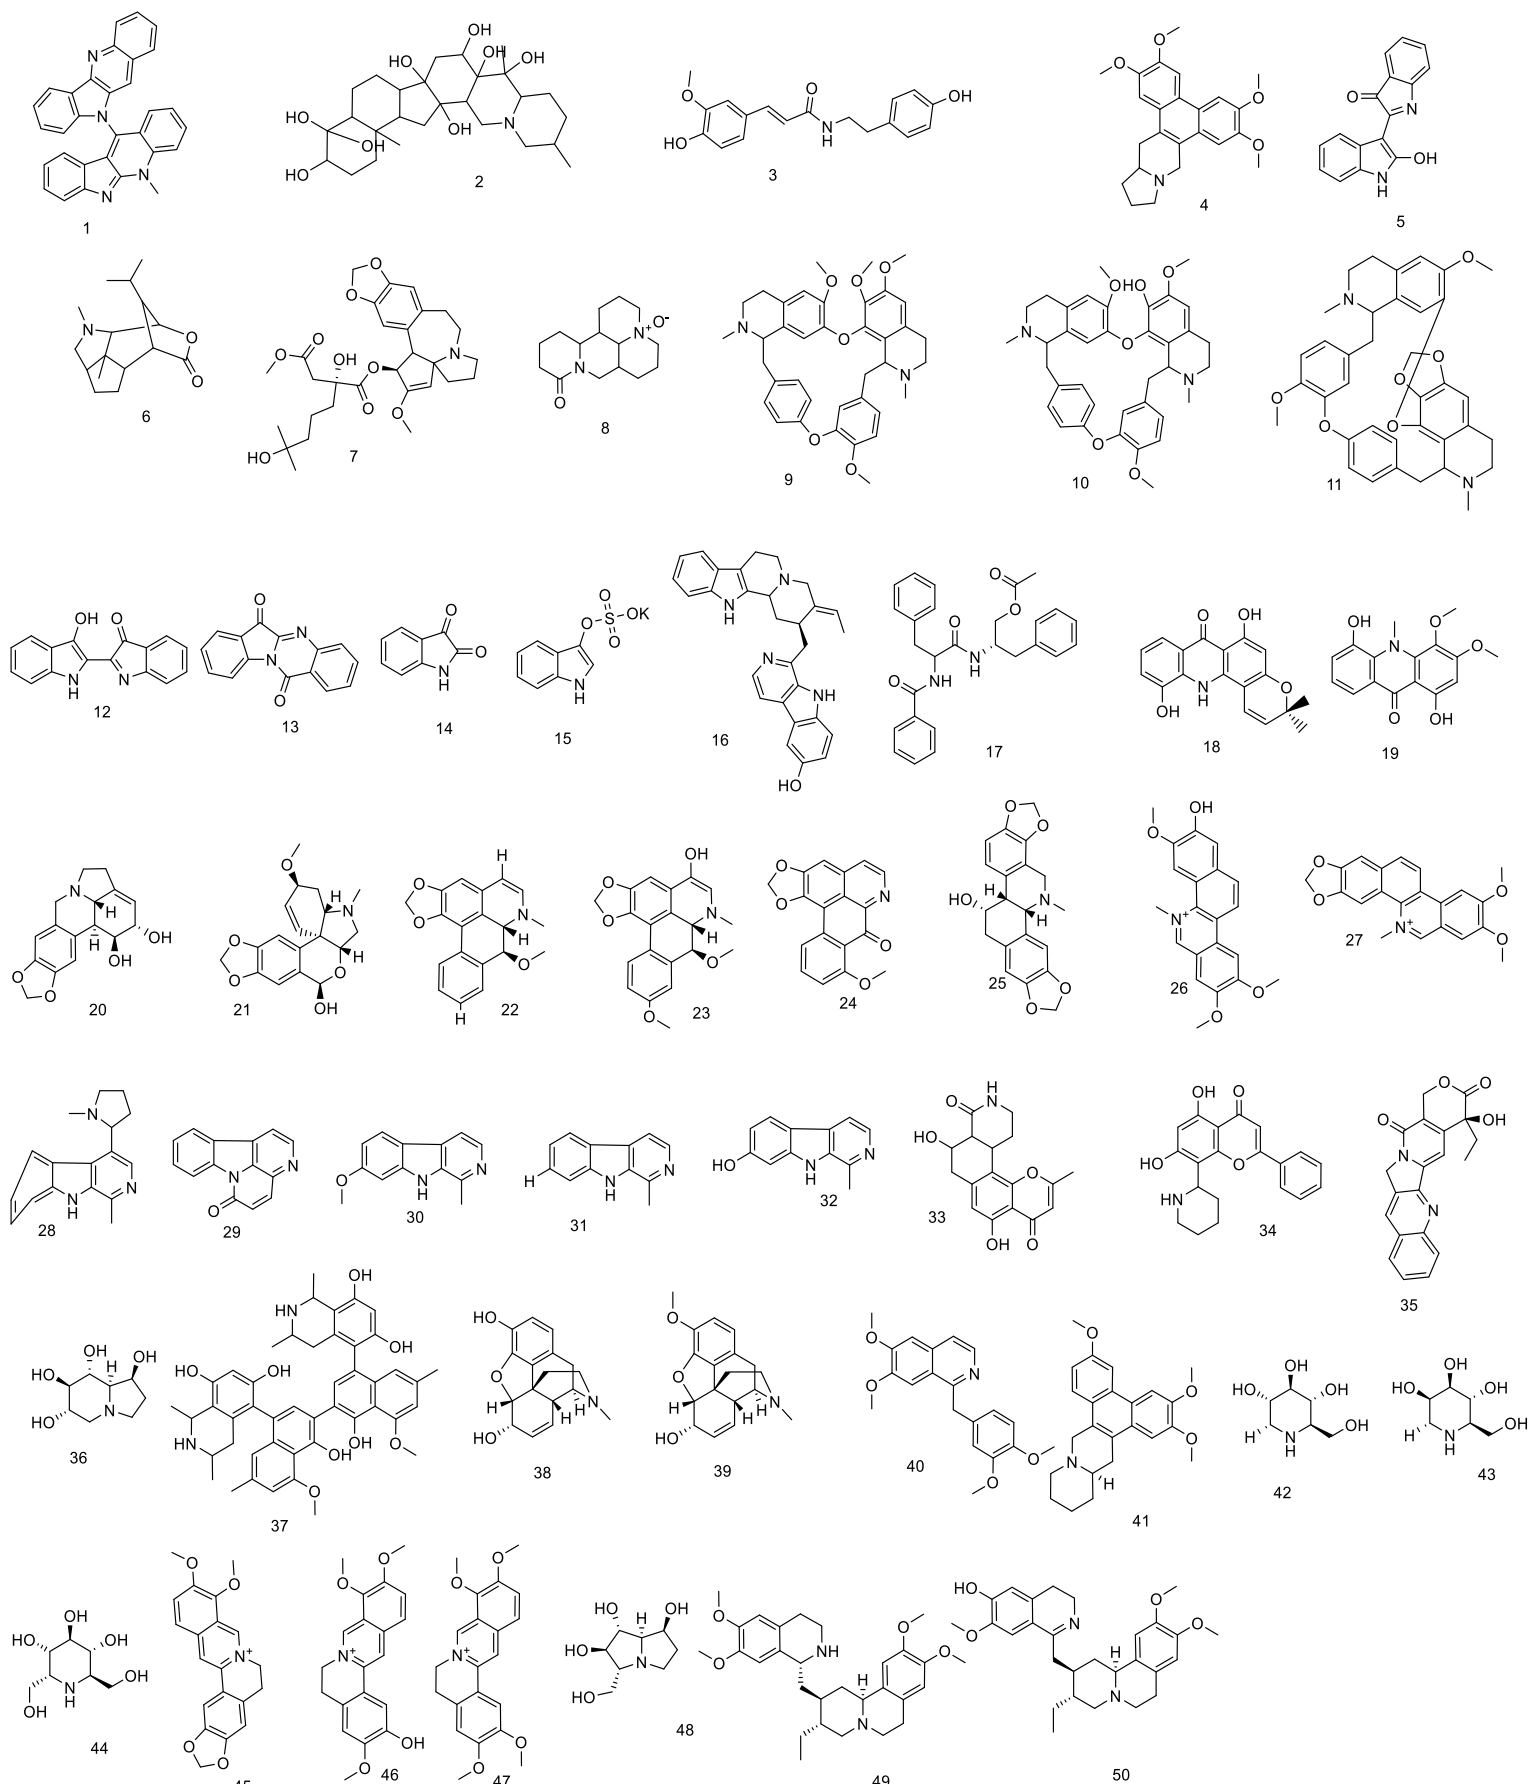

Figure S1. Chemical structures of the examined 310 natural antiviral compounds

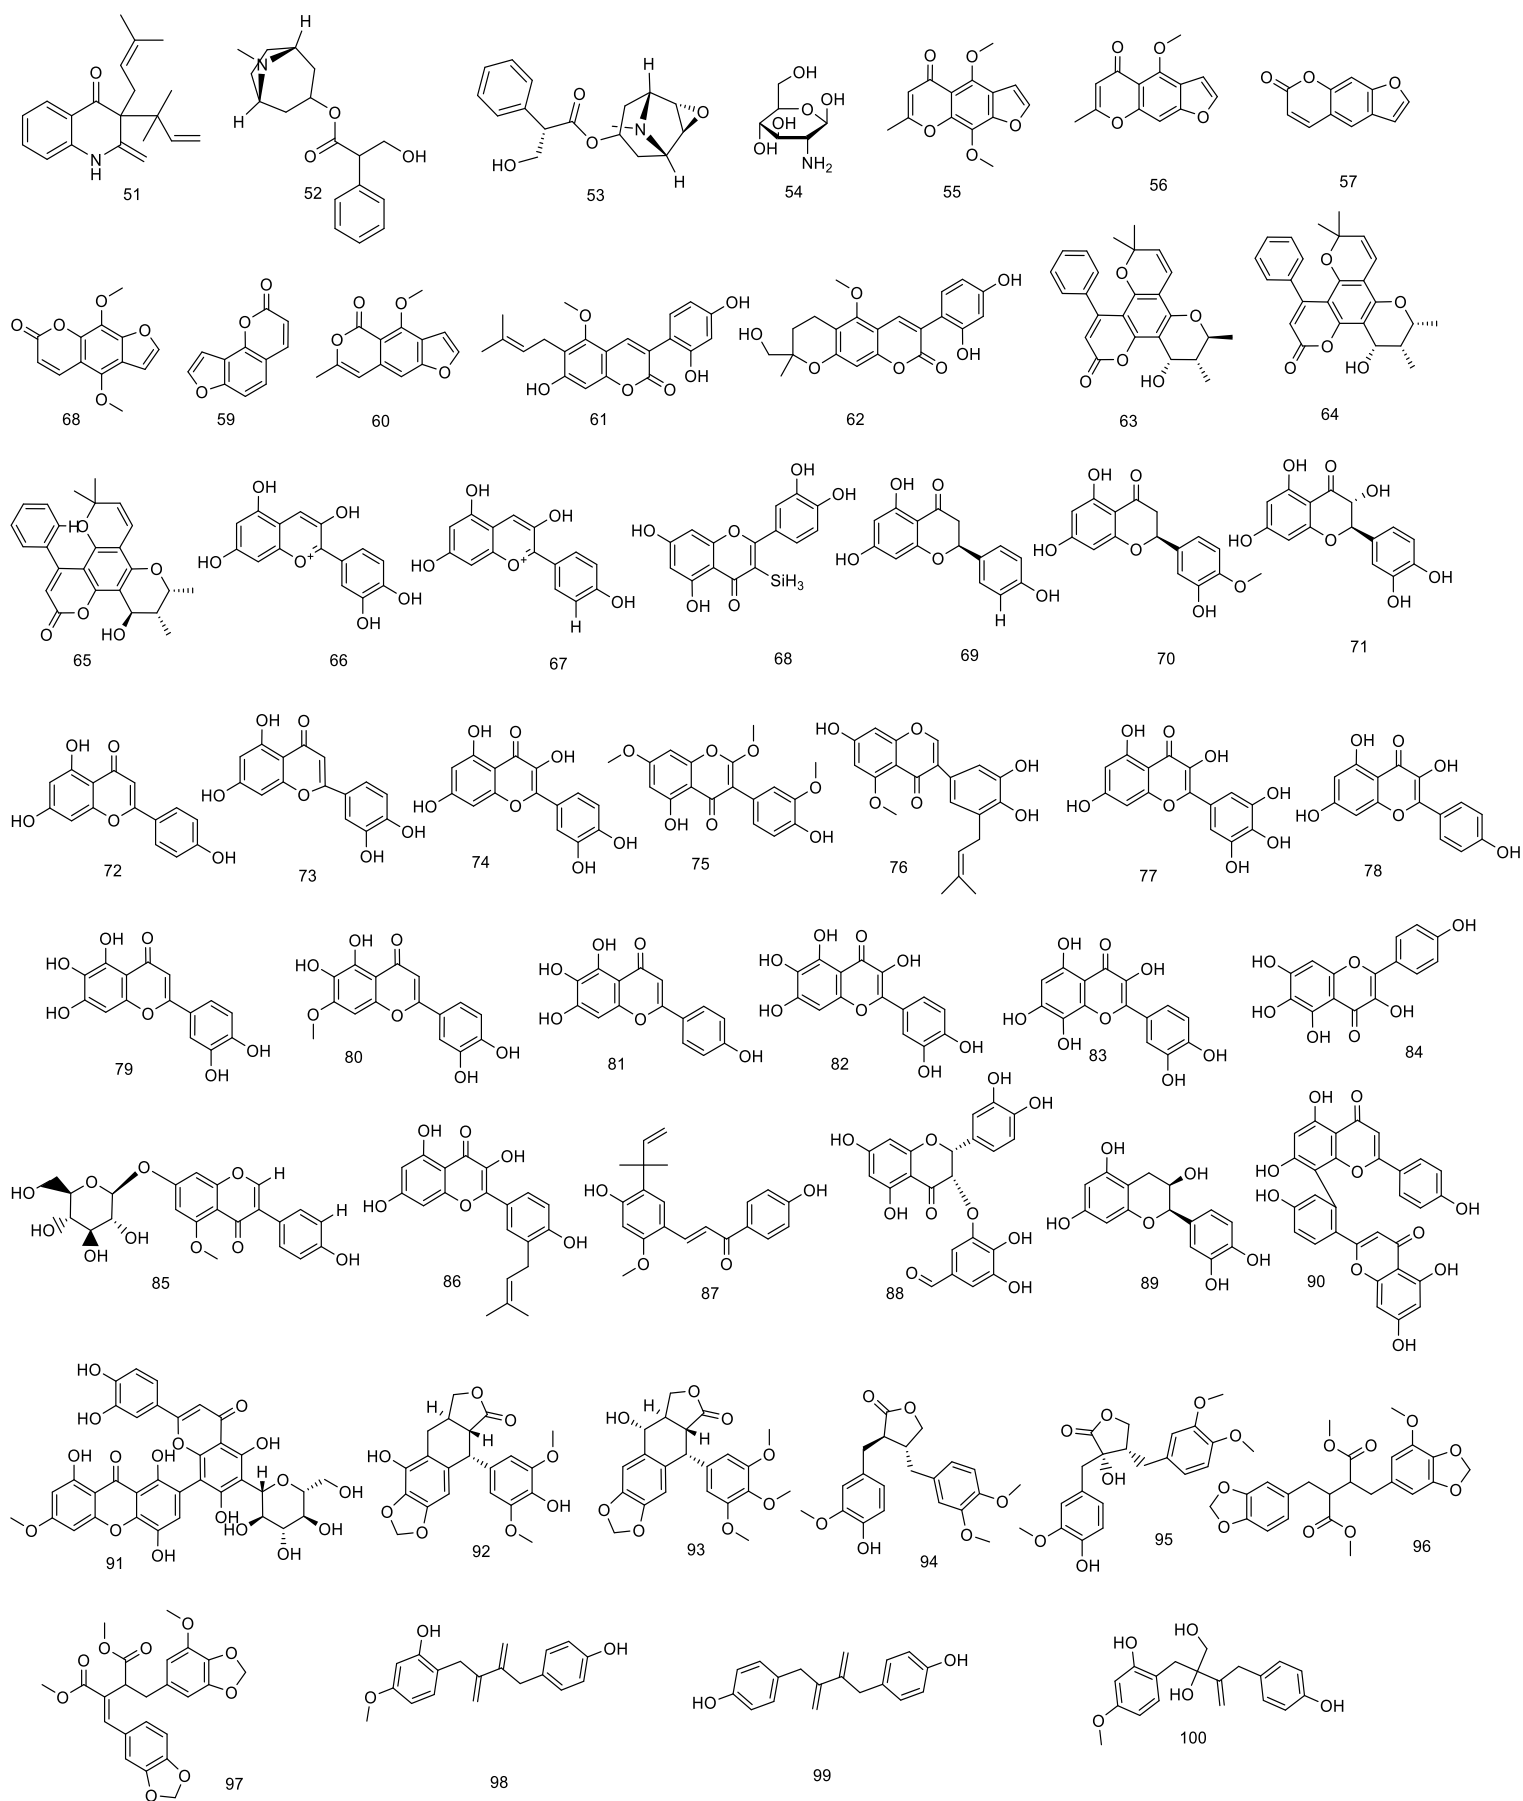

Figure S1. Chemical structures of the examined 310 natural antiviral compounds

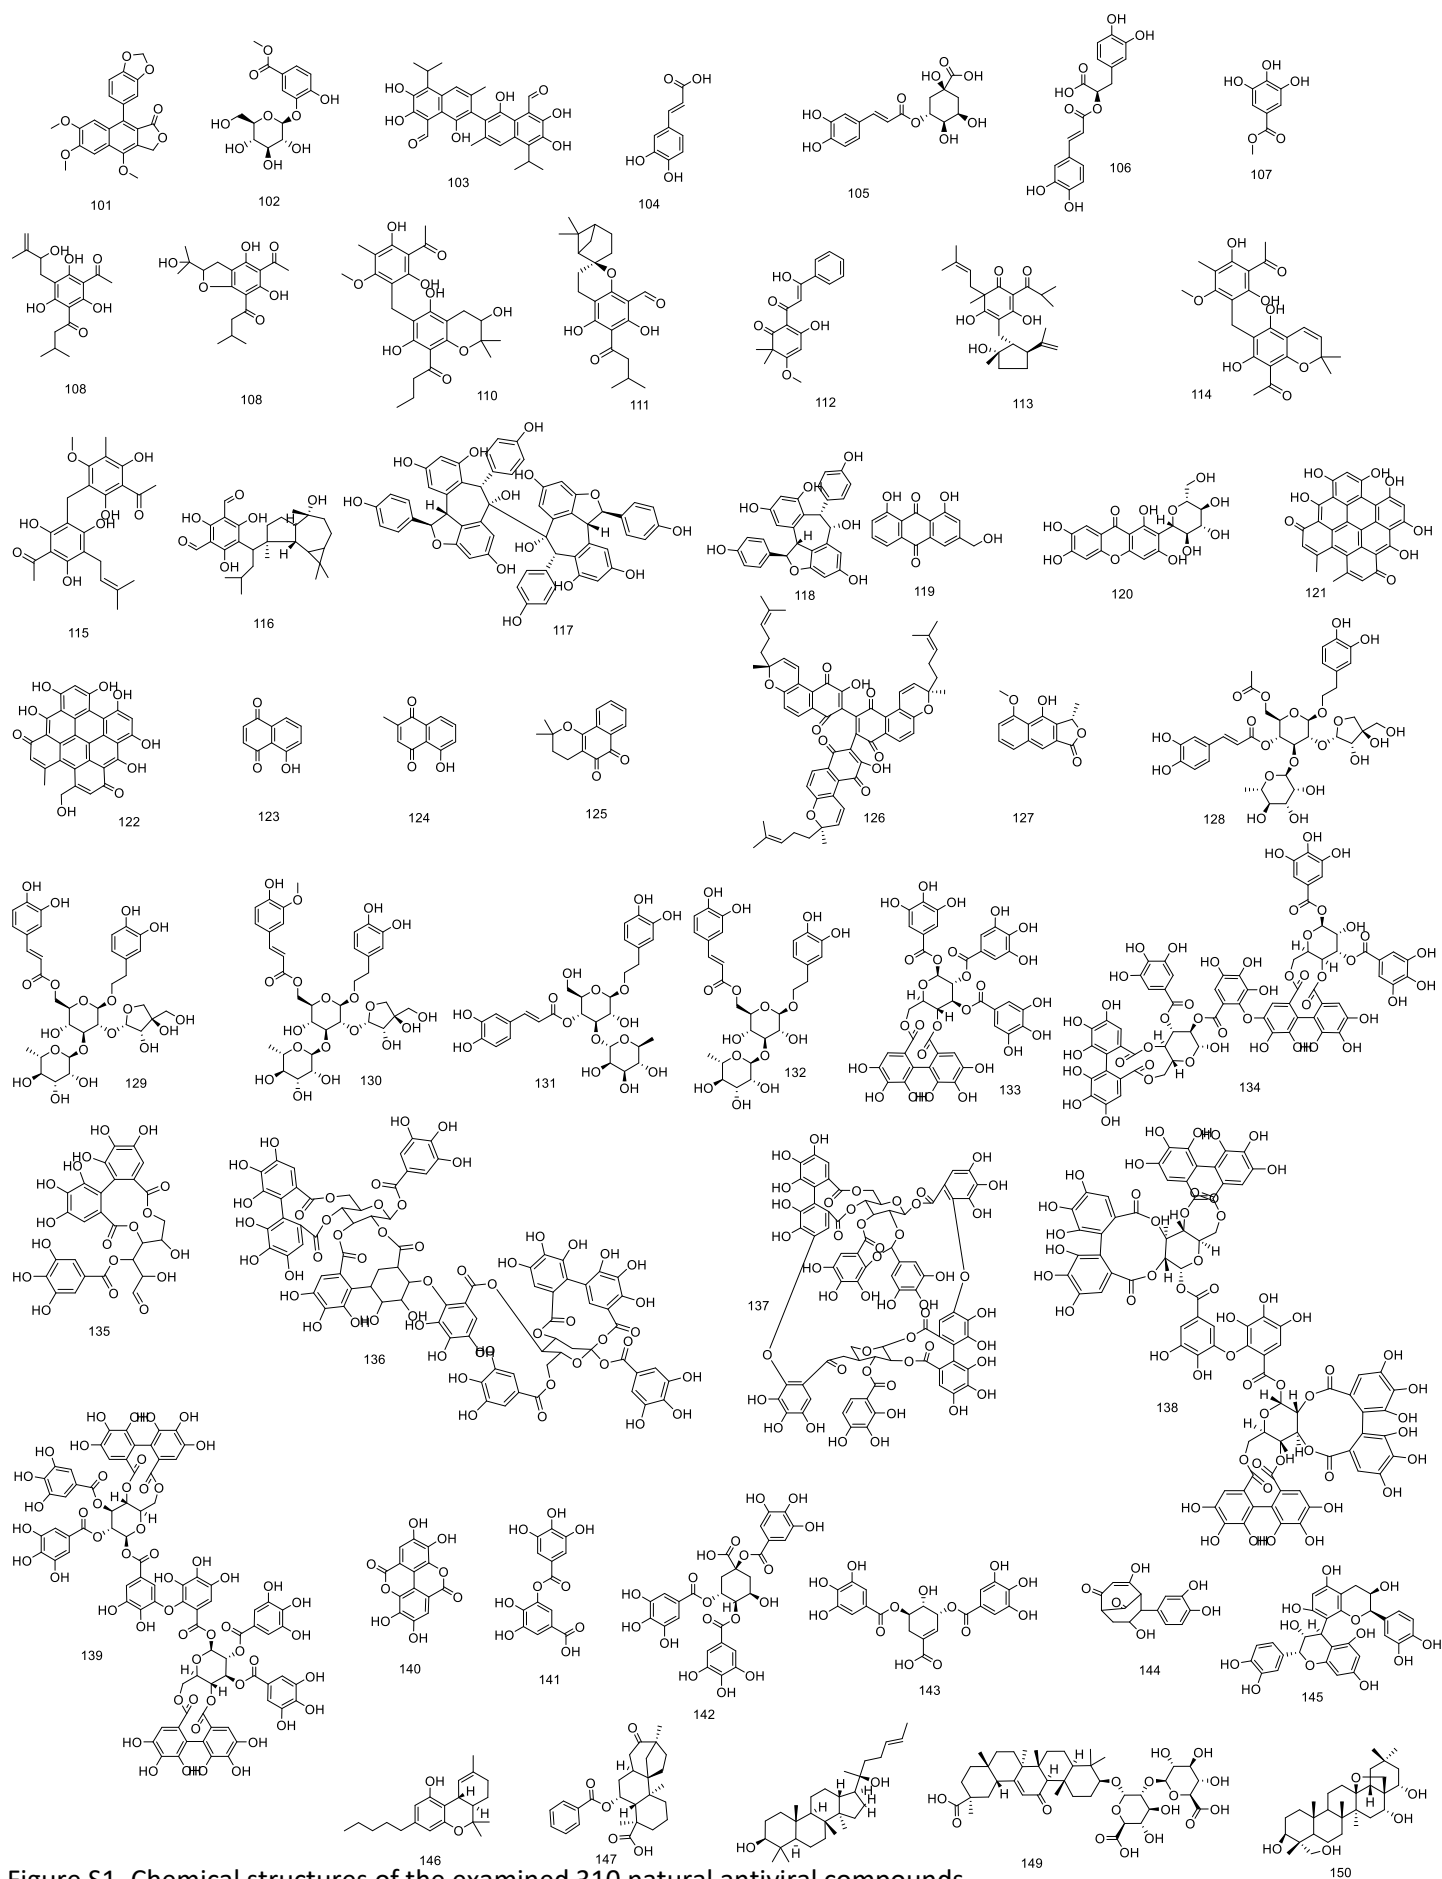

Figure S1. Chemical structures of the examined 310 natural antiviral compounds

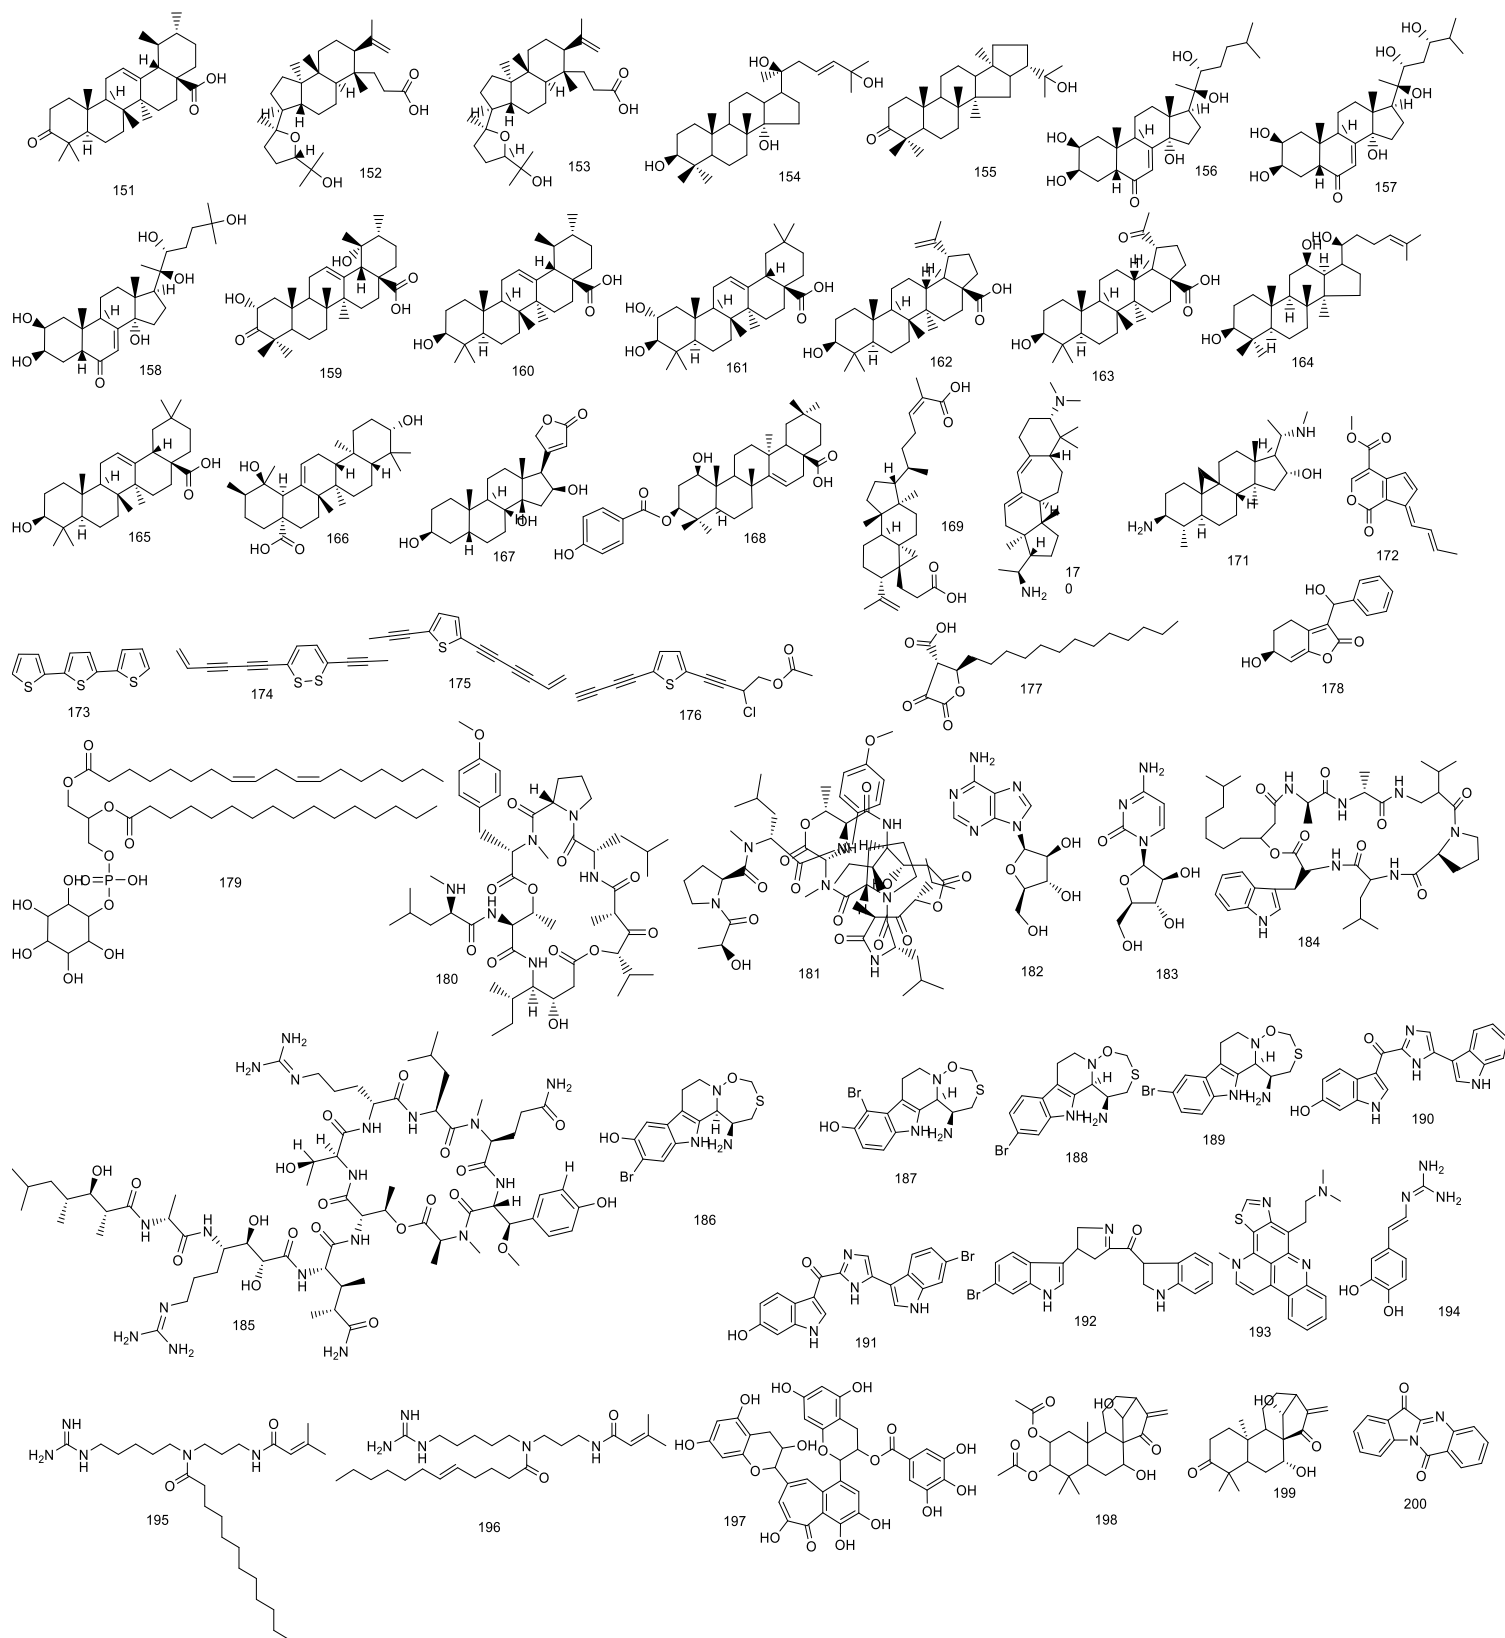

Figure S1. Chemical structures of the examined 310 natural antiviral compounds

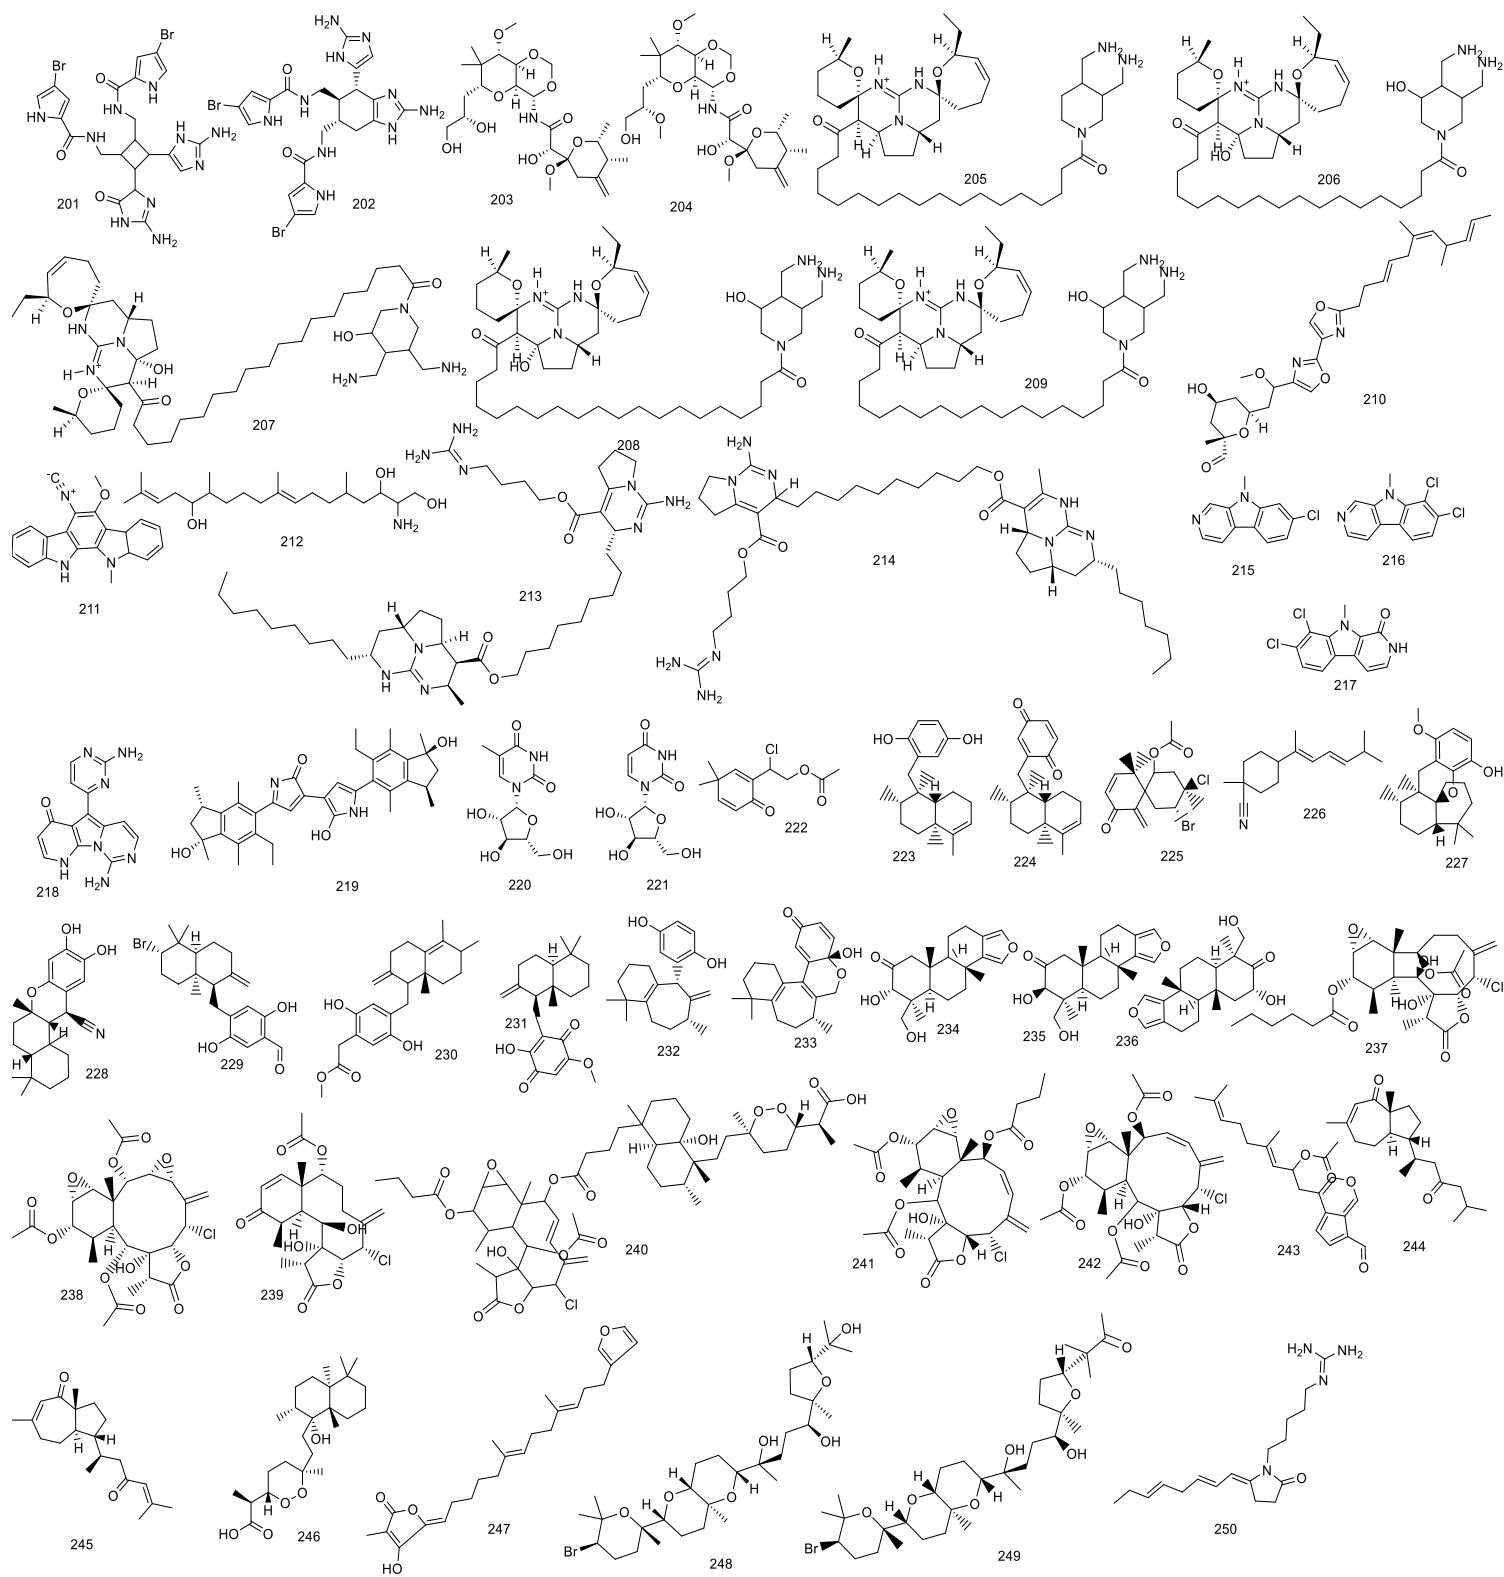

Figure S1. Chemical structures of the examined 310 natural antiviral compounds

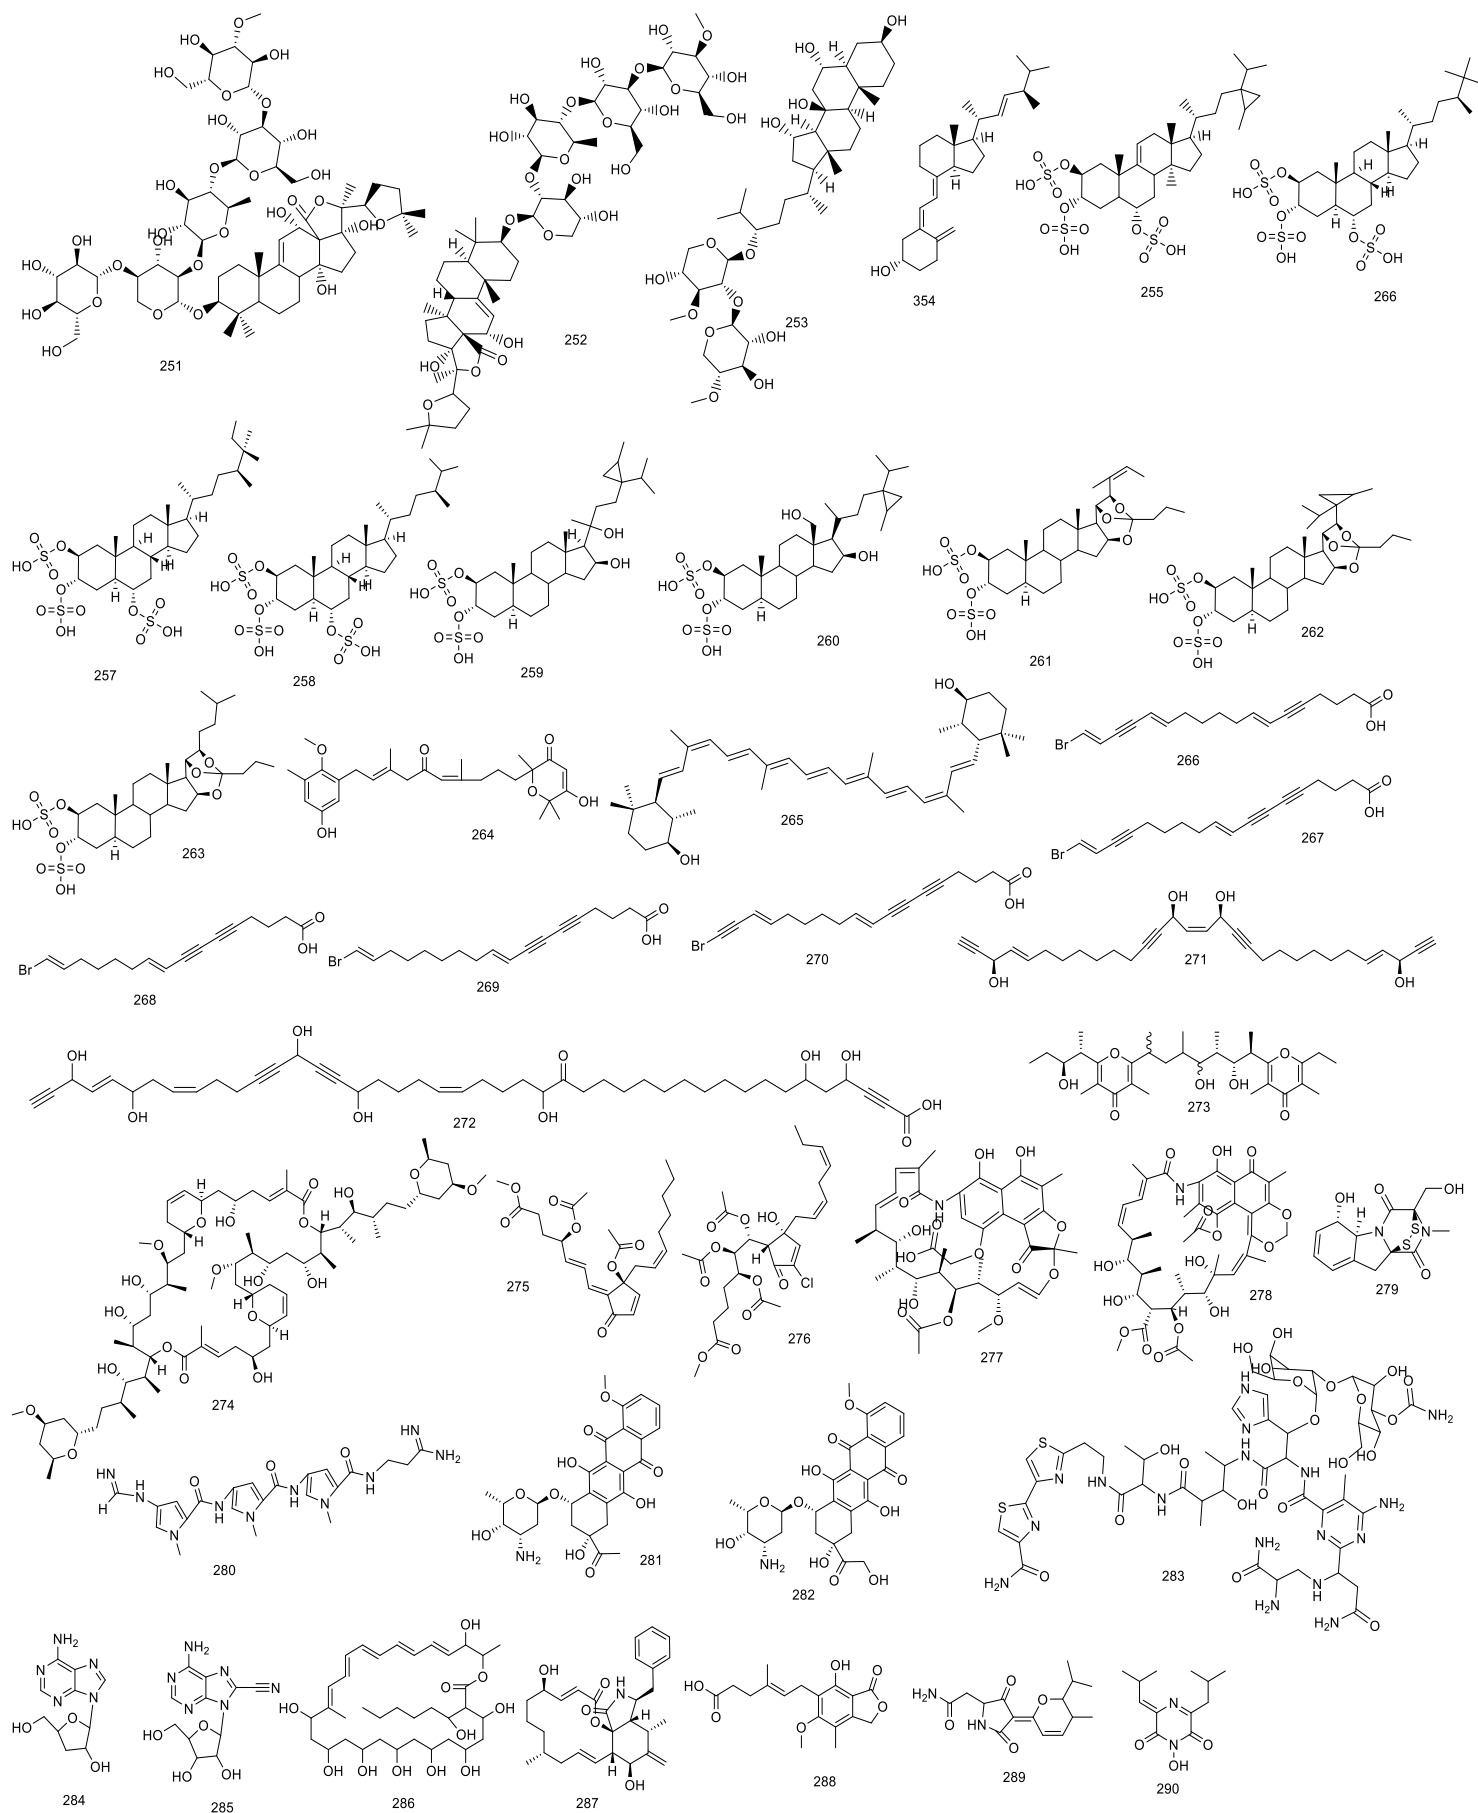

Figure S1. Chemical structures of the examined 310 natural antiviral compounds



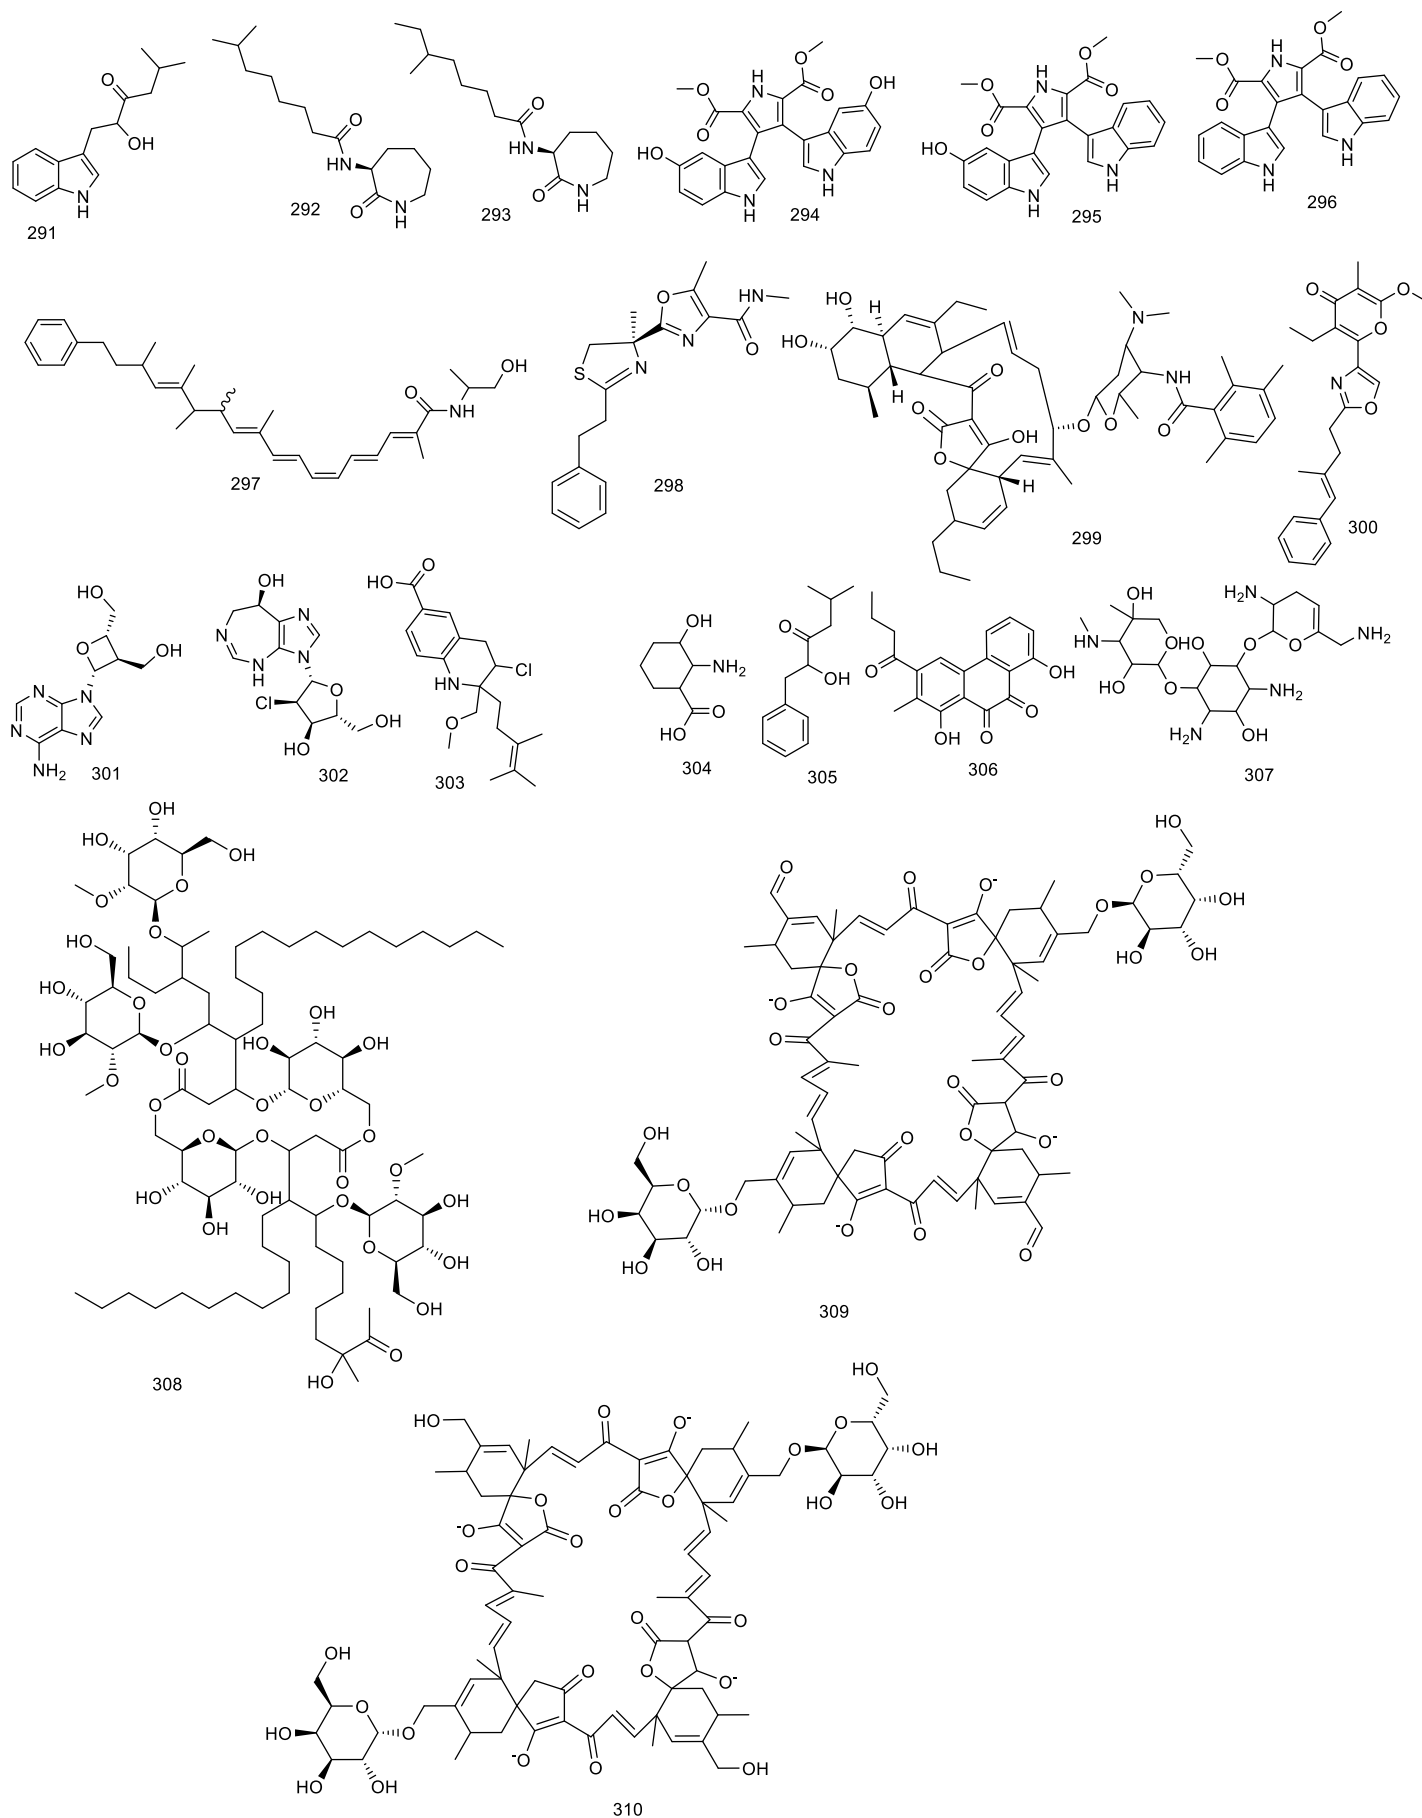

Figure S1. Chemical structures of the examined 310 natural antiviral compounds

### The binding mode of compound 128

The antiviral compound (**128**) revealed five hydrogen bonds in addition to three hydrophobic interactions. The tetrahydro-2*H*-pyran-3,4,5-triol moiety was suited in the 1<sup>st</sup> pocket of the receptor making two hydrogen bonds with Gln189 and Asp187. Additionally, it was incorporated in three hydrophobic interactions with Met165, His164, and His41. The 3-(hydroxymethyl)tetrahydrofuran-3,4-diol moiety occupied the 2<sup>nd</sup> pocket and engaged in two hydrogen bonds with Thr190 and Glu166. Moreover, the 3-(3,4-dihydroxyphenyl)-1-(*l*-oxidanyl)prop-2-en-1-one formed a hydrophobic interaction with His41 in the 3<sup>rd</sup> pocket. Finally, the 4-ethylbenzene-1,2-diol moiety occupied the fourth pocket.

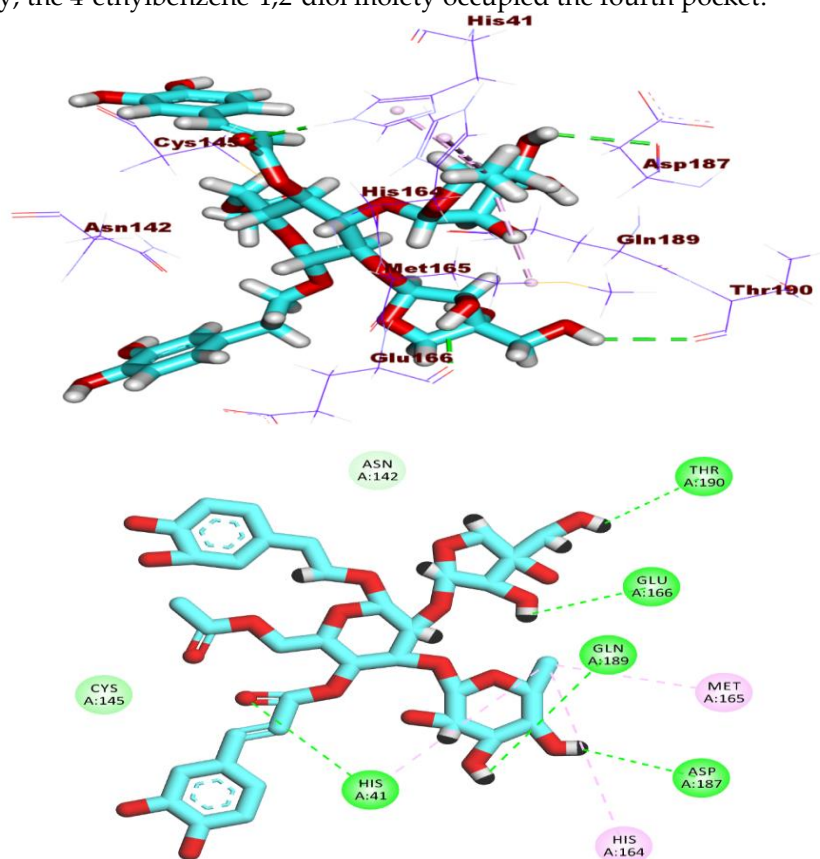

**Figure S2.** The binding pattern of compound **128** inside M<sup>pro</sup> (PDB ID: 6LU7) active site

### The binding mode of compound 156

The antiviral compound, **156** revealed an affinity value of -29.09 kcal. Mol<sup>-1</sup>. The docking pose showed that it occupied the four different pockets of the receptor through five hydrogen bonds with Phe140, Cys145, Leu141, Thr190, and Glu166. Additionally, it was engaged in two hydrophobic interactions with Met165 and Ala191.

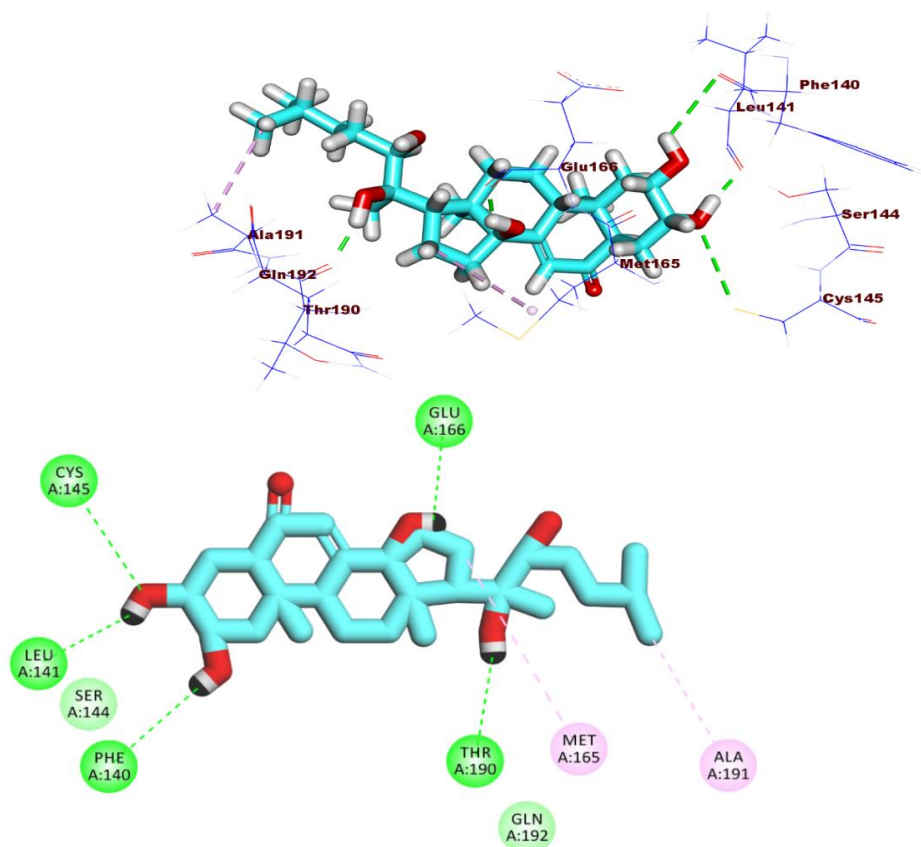

**Figure S3.** The binding pattern of compound **156** inside M<sup>pro</sup> (PDB ID: 6LU7) active site

#### The binding mode of compound **180**

The antiviral compound, **180** occupied the four different pockets of the main protease through the engagement in four hydrogen bonds in addition to thirteen hydrophobic interactions. The 4<sup>th</sup> pocket of M<sup>pro</sup> was occupied by *p*-methoxybenzene and *N*,4-dimethyl-2-(methylamino)pentanamide moieties through the formation of five hydrophobic interactions with Pro168 and Leu167. While the 3<sup>rd</sup> pocket was occupied by the 1-hydroxy-3-methylpentan-2-yl)acetamide moiety through the formation of a hydrogen bond with His164 and hydrophobic interactions (three) with His41 and Met49. Likewise, the 2<sup>nd</sup> pocket was occupied by 2,5-dimethyl-6-((4-methyl-1-oxopentan-2-yl)amino)- 4,6-dioxohexan-3-yl acetate moiety through the engagement in hydrogen bonds with Cys145, Asn142, and His41 together with four hydrophobic interactions with His172, His163, and Cys145.

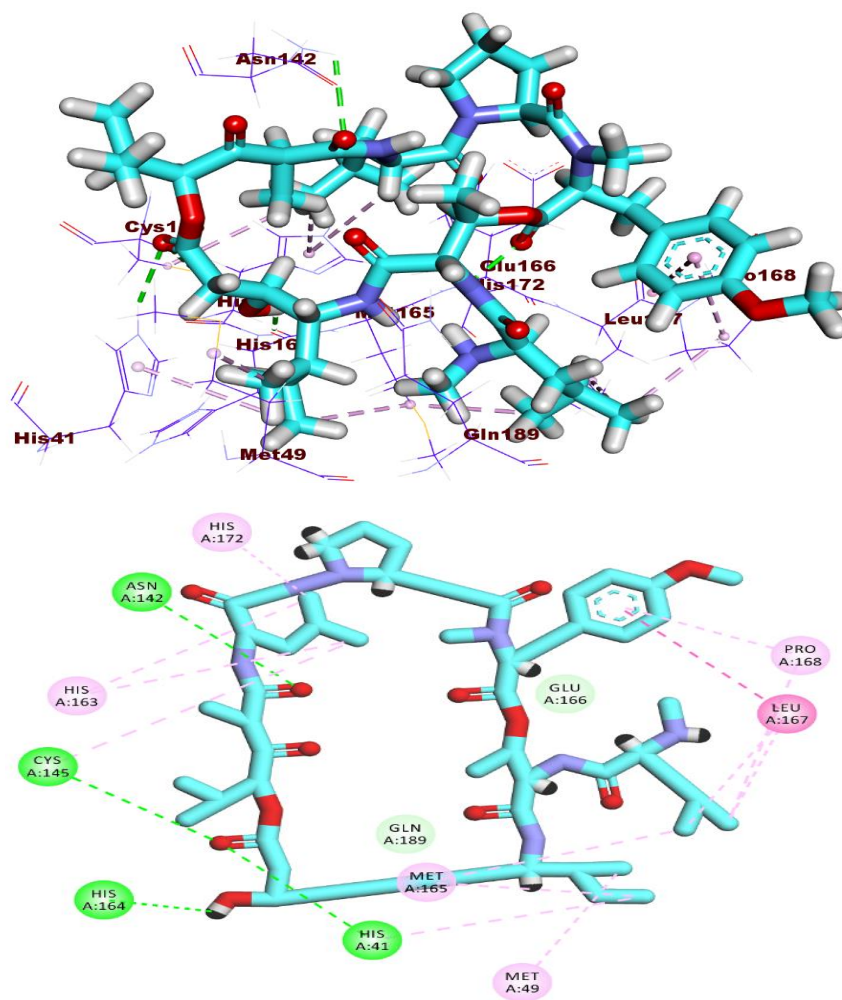

**Figure S4.** The binding pattern of compound **180** inside M<sup>pro</sup> (PDB ID: 6LU7) active site

#### The binding mode of compound **203**

The proposed binding mode of **203** displayed occupation of the four pockets of the main protease. The 2,3-dimethyl-4-methylenetetrahydro-2*H*-pyran formed a hydrophobic interaction with Pro168 (in the 1<sup>st</sup> pocket). The butane-1,2-diol moiety was engaged in three hydrogen bonds with His163, Glu166, Phe140 (in the 2<sup>nd</sup> pocket). The 4-methoxy-3,3-dimethyltetrahydro-2*H*-pyran moiety formed a hydrophobic interaction with Cys145 (in the 3<sup>rd</sup> pocket). Meanwhile, the 2-hydroxy-*N*-methylacetamide moiety formed one hydrogen bond with Gln189 (in the 4<sup>th</sup> pocket).

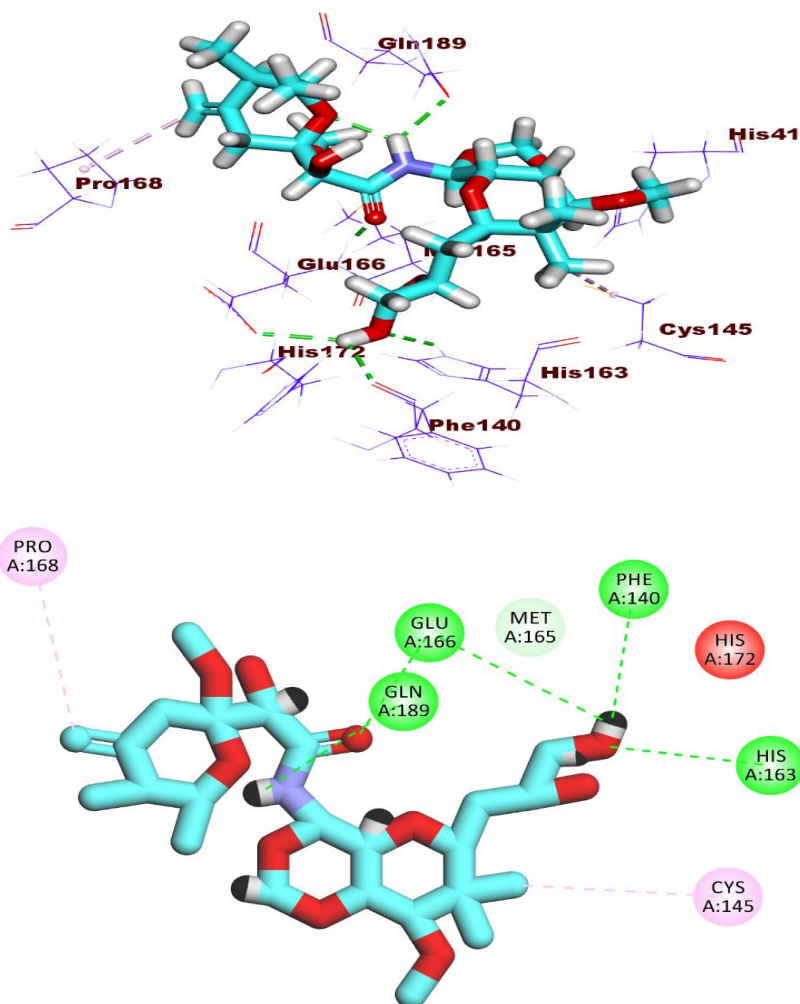

**Figure S5.** Binding mode of compound **203** inside M<sup>pro</sup> (PDB ID: 6LU7) active site

#### The binding mode of compound **204**

Compound **204** showed a  $\Delta G$  value of -33.03 kcal/mol and additionally buried in the main protease active pockets. The 6-methoxy-2,3-dimethyl-4-methylenetetrahydro-2H-pyran was engaged in a hydrogen bonding with Gly143 in addition to four hydrophobic interactions with Leu27, Cys145, His41. Also, 2-methoxybutan-1-ol made a hydrogen bond with Glu166. Finally, the 4-methoxy-3,3-dimethyltetrahydro-2H-pyran moiety was engaged in two hydrophobic interactions with His41 and Met165.

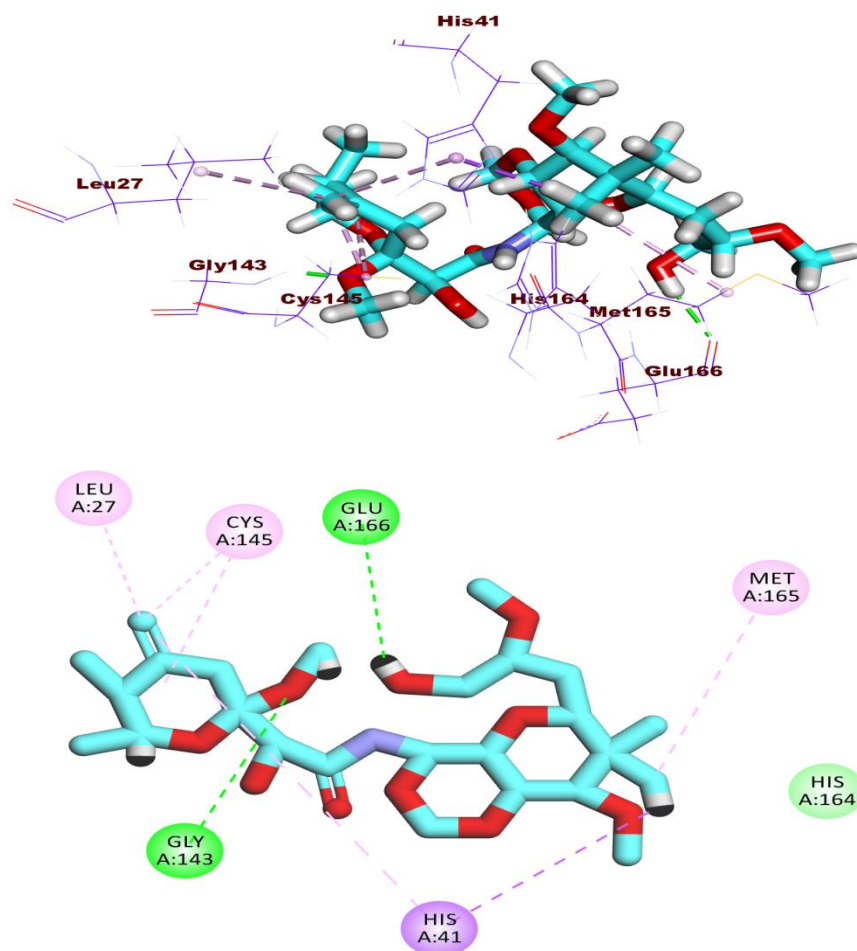

**Figure S6.** Binding mode of compound **204** inside M<sup>pro</sup> (PDB ID: 6LU7) active site

# Method

## Method

### 1- Molecular Similarity

Molecular Similarity of the 310 natural compounds against the co-crystallized ligand of SARS-CoV-2 main protease [(PDB ID: 6LU7) , resolution: 1.83Å] was carried out calculated using Discovery studio 4.0. At first, the CHARMM force field was applied then the compounds were prepared using prepare ligand protocol. Then, the 310 compounds were used as a test set while the co-crystallized ligand was used as a reference compounds. The protocol was adjusted to give 10% output. The default molecular properties were applied. The molecular properties include number of rotatable bonds, number of rings, number of aromatic rings, number of hydrogen bond donors (HBA), number of hydrogen bond acceptors (HBD), partition coefficient (ALog p), molecular weight (M. Wt), and molecular fractional polar surface area (MFPSA).

### 2- Fingerprint study

A fingerprint study of the 30 selected compounds against the co-crystallized ligand of SARS-Cov-2 main protease [(PDB ID: 6LU7) , resolution: 1.83Å] was carried out calculated using Discovery studio 4.0. At first, the CHARMM force field was applied then the compounds were prepared using prepare ligand protocol. Then, the 30 compounds were used as a test set while the co-crystallized ligand was used as a reference compound. The protocol was adjusted to give the most related compounds to the co-crystallized ligand (40-50%). The default molecular properties were applied. The used fingerprints were based on some parameters related to type of atoms which may be one of the following: charge, hybridization, H-bond acceptor, H-bond donor, Positive ionizable, Negative ionizable, Halogen, Aromatic, or None of the above. In addition, it includes the ALogP category of atoms.

### 3- Docking studies

Crystal structure of SARS-CoV-2 main protease [(PDB ID: 6LU7), resolution: 1.83Å] was obtained from Protein Data Bank. The docking investigation was accomplished using MOE2014 software. At first, the crystal structure of SARS-Cov-2 main protease was prepared by removing water molecules. Only one chain was retained besides the co-crystallized ligand. Then, the selected



chain was protonated and subjected to minimization of energy process. Next, the active site of the target protein was defined.

Structures of the tested compounds and the co-crystallized ligand were drawn using ChemBioDraw Ultra 14.0 and saved as MDL-SD format. Such file was opened using MOE to display the 3D structures which were protonated and subjected to energy minimization. Formerly, validation of the docking process was performed by docking the co-crystallized ligand against the isolated pocket of active site. The produced RMSD value indicated the validity of process. Finally, docking of the tested compounds was done through the dock option inserted in compute window. For each docked molecule, 30 docked poses were produced using ASE for scoring function and force field for refinement. The results of the docking process were then visualized using Discovery Studio 4.0 software.

#### **4- Toxicity studies**

The toxicity parameters of the tested compounds were calculated using Discovery studio 4.0. Indinavir was used as a reference drug. At first, the CHARMM force field was applied then the compounds were prepared and minimized according to the preparation of small molecule protocol. Then different parameters were calculated from the toxicity prediction (extensible) protocol.

#### **5- Molecular Dynamics (MD)**

All molecular dynamics (MD) simulations were performed using the GRONINGEN MACHINE for Chemical Simulations GROMACS 5.1.1 software developed by (University of Groningen, Royal Institute of Technology and Uppsala University) [1]. Five MD simulation experiments were conducted to validate the results retrieved from the docking step. One experiment was performed on the ligand-free Mpro, while the other four were conducted on the enzyme in complex with the retrieved **130**, **184**, **278** and the crystal reference. The ligand topologies were generated by the GlycoBioChem PRODRG2 Server under the GROMOS96 force field and were joined with the enzyme topology, using the standard published protocol. The typical workflow of the GROMACS enzyme–ligand simulations was applied with the solvation of the five systems, using the single point charge (SPC) water model to add water molecules to the cubic simulation boxes. The five systems were neutralized by adding the suitable number of counter-ions to the solvated complexes.

The energy minimization step for the unbound and the complexed enzyme structures was achieved, using the steepest descent minimization algorithm with a maximum of 50,000 steps and < 10.0 kJ/mol force under the GROMOS96 43a1 force field. Two consecutive equilibration ensembles were conducted on the energy-minimized structures.

Beginning with the NVT ensemble (constant number of particles, volume and temperature) (310 K) was done for 2 ns followed by the NPT ensemble (constant number of particles, pressure and temperature) for 8 ns. The particle mesh ewald (PME) method with a 12 Å cut-off and 12 Å Fourier spacing were used to get the long-range electrostatic value. The five equilibrated systems entered the production stage without any restraints for 100 ns with a time step of 2 fs, and the structural coordinates were saved every 20 ps. Both the temperature (310 K) and the pressure (1 atm) were regulated throughout the simulation V-rescale weak coupling method (modified Berendsen thermostat) and Parrinello–Rahman method. The root means square deviation (RMSD) and root means square fluctuation (RMSF) of the entire system and each residue respectively, were calculated from the generated trajectories from the production step. To provide further insights into the binding of the three ligands and the M<sup>pro</sup> enzyme, the radial distribution function (RDF) was calculated

### ***MM-PBSA Calculation and per-residue contribution***

Binding-free energy calculations were performed, using MM–PBSA, which applies the following equation:  $\Delta G_{\text{(Binding)}} = G_{\text{(Complex)}} - G_{\text{(Receptor)}} - G_{\text{(Ligand)}}$

where  $G_{\text{(Complex)}}$  is the total free energy of the protein–ligand complex and  $G_{\text{(Receptor)}}$  and  $G_{\text{(Ligand)}}$  are the total free energies of the isolated protein and ligand in solvent, respectively. The total free energy of any of the three mentioned entities (complex, receptor and ligand) were calculated for all MD trajectories from its molecular mechanics potential energy plus the energy of the solvation, using the g\_mmpbsa package implemented in the GROMACS software. Individual energies along with the values of standard deviations were calculated and then summed together to yield the average total free energy of each component. Finally, to calculate the binding-free energy, the total free energy of the receptor and the ligand were subtracted from the total free energy of the complex. These calculations were done for the four complexes of M<sup>pro</sup>–130, M<sup>pro</sup>–184, M<sup>pro</sup>–278 and M<sup>pro</sup>–crystal reference.

# Toxicity Report

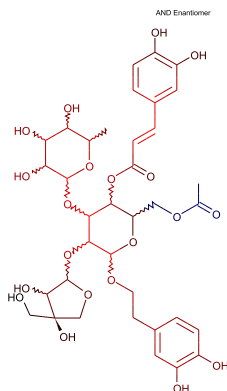

$C_{36}H_{46}O_{20}$

Molecular Weight: 798.73843

ALogP: -0.546

Rotatable Bonds: 16

Acceptors: 20

Donors: 10

## Model Prediction

**Prediction: Toxic**

Probability: 0.973

Enrichment: 1.851

Bayesian Score: 15.947

Mahalanobis Distance: 15.893

Mahalanobis Distance p-value: 3.07e-013

Prediction: Positive if the Bayesian score is above the estimated best cutoff value from minimizing the false positive and false negative rate.

Probability: The estimated probability that the sample is in the positive category. This assumes that the Bayesian score follows a normal distribution and is different from the prediction using a cutoff.

Enrichment: An estimate of enrichment, that is, the increased likelihood (versus random) of this sample being in the category.

Bayesian Score: The standard Laplacian-modified Bayesian score.

Mahalanobis Distance: The Mahalanobis distance (MD) is the distance to the center of the training data. The larger the MD, the less trustworthy the prediction.

Mahalanobis Distance p-value: The p-value gives the fraction of training data with an MD greater than or equal to the one for the given sample, assuming normally distributed data. The smaller the p-value, the less trustworthy the prediction. For highly non-normal X properties (e.g., fingerprints), the MD p-value is wildly inaccurate.

## Structural Similar Compounds

| Name               | Solanine                                  | alpha-Chaconine                           | Formoterol Fumarate            |
|--------------------|-------------------------------------------|-------------------------------------------|--------------------------------|
| Structure          |                                           |                                           |                                |
| Actual Endpoint    | Toxic                                     | Toxic                                     | Toxic                          |
| Predicted Endpoint | Toxic                                     | Toxic                                     | Toxic                          |
| Distance           | 1.009                                     | 1.149                                     | 1.297                          |
| Reference          | Toxicol Appl Pharmacol 36(2):227-37; 1976 | Toxicol Appl Pharmacol 36(2):227-37; 1976 | Oyo Yakuri 27(2):239-249; 1984 |

## Model Applicability

Unknown features are fingerprint features in the query molecule, but not found in the training set.

1. Num\_H\_Donors out of range. Value: 10. Training min, max, mean, SD: 0, 9, 1.4481, 1.588.
2. Num\_H\_Acceptors out of range. Value: 20. Training min, max, mean, SD: 0, 16, 3.9037, 3.081.
3. OPS PC1 out of range. Value: 8.8808. Training min, max, SD, explained variance: -5.294, 7.595, 2.775, 0.1128.
4. OPS PC19 out of range. Value: -3.221. Training min, max, SD, explained variance: -2.7817, 3.2747, 1.037, 0.0157.

## Feature Contribution

### Top features for positive contribution

| Fingerprint | Bit/Smiles  | Feature Structure                     | Score | Toxic in training set |
|-------------|-------------|---------------------------------------|-------|-----------------------|
| SCFP_6      | -2031220028 | <br><chem>[*]OC(O[*])C([*])[*]</chem> | 0.538 | 7 out of 7            |

|                                        |             |                                                                                                                                                                              |        |                       |
|----------------------------------------|-------------|------------------------------------------------------------------------------------------------------------------------------------------------------------------------------|--------|-----------------------|
| SCFP_6                                 | -37268149   | <p>AND Enantiomer</p> 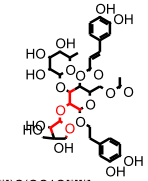 <p>[*]C([*])C(OC1O[*])[*]<br/>C1[*])C([*])[*]</p>                  | 0.523  | 6 out of 6            |
| SCFP_6                                 | -1642341584 | <p>AND Enantiomer</p>  <p>[*]CC[c]1:[cH]:[cH]:[cH]:[cH]<br/>c(O):[c]([*]):[cH]:<br/>1</p> | 0.504  | 5 out of 5            |
| Top Features for negative contribution |             |                                                                                                                                                                              |        |                       |
| Fingerprint                            | Bit/Smiles  | Feature Structure                                                                                                                                                            | Score  | Toxic in training set |
| SCFP_6                                 | 733985735   | <p>AND Enantiomer</p>  <p>[*]COC(=O)C</p>                                                 | -0.945 | 0 out of 3            |
| SCFP_6                                 | 681123313   | <p>AND Enantiomer</p>  <p>[*]OC(COC(=O)C)C([*])C([*])</p>                               | -0.422 | 0 out of 1            |
| SCFP_6                                 | -183093204  | <p>AND Enantiomer</p>  <p>[*]OC(COC(=O)C)C([*])C([*])</p>                               | -0.422 | 0 out of 1            |

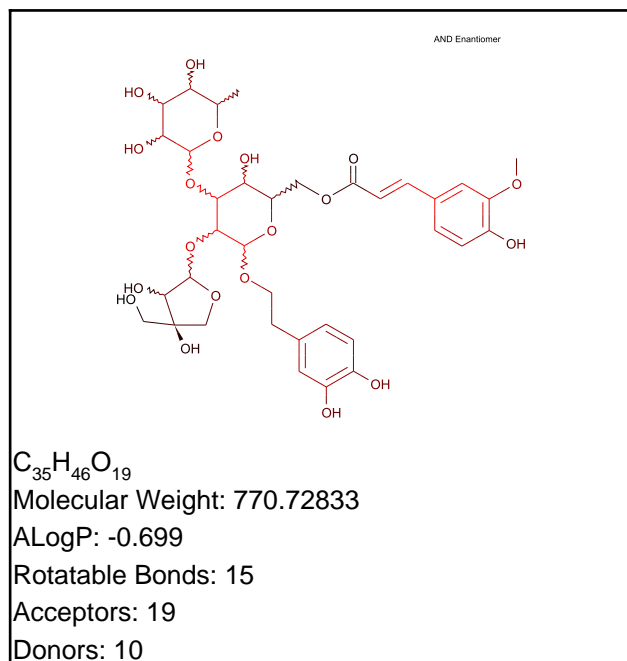

## Model Prediction

**Prediction: Toxic**

Probability: 0.990

Enrichment: 1.882

Bayesian Score: 19.253

Mahalanobis Distance: 14.317

Mahalanobis Distance p-value: 9.51e-010

Prediction: Positive if the Bayesian score is above the estimated best cutoff value from minimizing the false positive and false negative rate.

Probability: The estimated probability that the sample is in the positive category. This assumes that the Bayesian score follows a normal distribution and is different from the prediction using a cutoff.

Enrichment: An estimate of enrichment, that is, the increased likelihood (versus random) of this sample being in the category.

Bayesian Score: The standard Laplacian-modified Bayesian score.

Mahalanobis Distance: The Mahalanobis distance (MD) is the distance to the center of the training data. The larger the MD, the less trustworthy the prediction.

Mahalanobis Distance p-value: The p-value gives the fraction of training data with an MD greater than or equal to the one for the given sample, assuming normally distributed data. The smaller the p-value, the less trustworthy the prediction. For highly non-normal X properties (e.g., fingerprints), the MD p-value is wildly inaccurate.

## Structural Similar Compounds

| Name               | Solanine                                                                            | alpha-Chaconine                                                                     | Formoterol Fumarate                                                                 |
|--------------------|-------------------------------------------------------------------------------------|-------------------------------------------------------------------------------------|-------------------------------------------------------------------------------------|
| Structure          | 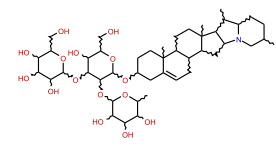 |  |  |
| Actual Endpoint    | Toxic                                                                               | Toxic                                                                               | Toxic                                                                               |
| Predicted Endpoint | Toxic                                                                               | Toxic                                                                               | Toxic                                                                               |
| Distance           | 0.936                                                                               | 1.085                                                                               | 1.255                                                                               |
| Reference          | Toxicol Appl Pharmacol 36(2):227-37; 1976                                           | Toxicol Appl Pharmacol 36(2):227-37; 1976                                           | Oyo Yakuri 27(2):239-249; 1984                                                      |

## Model Applicability

Unknown features are fingerprint features in the query molecule, but not found in the training set.

1. Num\_H\_Donors out of range. Value: 10. Training min, max, mean, SD: 0, 9, 1.4481, 1.588.
2. Num\_H\_Acceptors out of range. Value: 19. Training min, max, mean, SD: 0, 16, 3.9037, 3.081.
3. OPS PC1 out of range. Value: 8.6292. Training min, max, SD, explained variance: -5.294, 7.595, 2.775, 0.1128.
4. OPS PC4 out of range. Value: 5.4941. Training min, max, SD, explained variance: -4.3289, 5.2858, 1.931, 0.0547.

## Feature Contribution

### Top features for positive contribution

| Fingerprint | Bit/Smiles  | Feature Structure                                                                                             | Score | Toxic in training set |
|-------------|-------------|---------------------------------------------------------------------------------------------------------------|-------|-----------------------|
| SCFP_6      | -2031220028 | 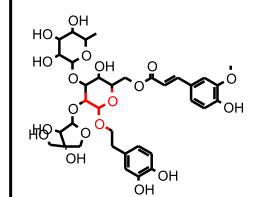<br>[*]OC(O[*])C([*])[*] | 0.538 | 7 out of 7            |

|                                        |             |                                                                                                                                                          |        |                       |
|----------------------------------------|-------------|----------------------------------------------------------------------------------------------------------------------------------------------------------|--------|-----------------------|
| SCFP_6                                 | -37268149   | 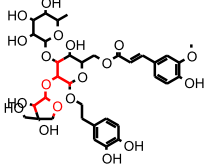<br><chem>[*]C([*])C(OC1O[*])[*]<br/>C1[*])C([*])[*]</chem>           | 0.523  | 6 out of 6            |
| SCFP_6                                 | -1642341584 | <br><chem>[*]CC[c]1:[cH]3[cH]:[<br/>c](O):[c]([*]):[cH]:<br/>1</chem> | 0.504  | 5 out of 5            |
| Top Features for negative contribution |             |                                                                                                                                                          |        |                       |
| Fingerprint                            | Bit/Smiles  | Feature Structure                                                                                                                                        | Score  | Toxic in training set |
| SCFP_6                                 | 1586247563  | <br><chem>[*]C([*])COC(=O)C=[*]</chem>                                | -0.438 | 1 out of 4            |
| SCFP_6                                 | -183093204  | <br><chem>[*]OC(COC(=[*])[*])C([*])[*]</chem>                        | -0.422 | 0 out of 1            |
| SCFP_6                                 | 1132907712  | <br><chem>[*]OC(=O)C=[*]</chem>                                     | -0.184 | 9 out of 21           |

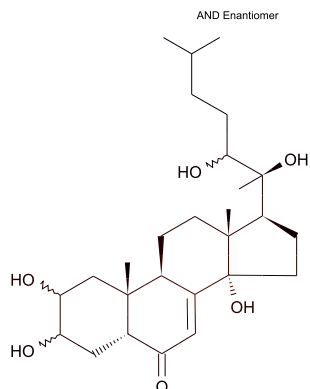
 $C_{27}H_{44}O_6$ 

Molecular Weight: 464.63466

ALogP: 2.489

Rotatable Bonds: 5

Acceptors: 6

Donors: 5

## Model Prediction

**Prediction: Toxic**

Probability: 0.684

Enrichment: 1.301

Bayesian Score: 3.514

Mahalanobis Distance: 8.742

Mahalanobis Distance p-value: 0.266

Prediction: Positive if the Bayesian score is above the estimated best cutoff value from minimizing the false positive and false negative rate.

Probability: The estimated probability that the sample is in the positive category. This assumes that the Bayesian score follows a normal distribution and is different from the prediction using a cutoff.

Enrichment: An estimate of enrichment, that is, the increased likelihood (versus random) of this sample being in the category.

Bayesian Score: The standard Laplacian-modified Bayesian score.

Mahalanobis Distance: The Mahalanobis distance (MD) is the distance to the center of the training data. The larger the MD, the less trustworthy the prediction.

Mahalanobis Distance p-value: The p-value gives the fraction of training data with an MD greater than or equal to the one for the given sample, assuming normally distributed data. The smaller the p-value, the less trustworthy the prediction. For highly non-normal X properties (e.g., fingerprints), the MD p-value is wildly inaccurate.

## Structural Similar Compounds

| Name               | Fenoterol                          | Diflorasone Diacetate          | Ochratoxin a                             |
|--------------------|------------------------------------|--------------------------------|------------------------------------------|
| Structure          |                                    |                                |                                          |
| Actual Endpoint    | Toxic                              | Toxic                          | Toxic                                    |
| Predicted Endpoint | Toxic                              | Toxic                          | Toxic                                    |
| Distance           | 0.719                              | 0.759                          | 0.759                                    |
| Reference          | Iyakuin Kenkyu 12(3):742-761; 1981 | Oyo Yakuri 28(2):207-224; 1984 | Toxicol Appl Pharmacol 37(2):331-8; 1976 |

## Model Applicability

Unknown features are fingerprint features in the query molecule, but not found in the training set.

1. All properties and OPS components are within expected ranges.

## Feature Contribution

### Top features for positive contribution

| Fingerprint | Bit/Smiles  | Feature Structure | Score | Toxic in training set |
|-------------|-------------|-------------------|-------|-----------------------|
| SCFP_6      | -1971196727 |                   | 0.293 | 13 out of 18          |



| SCFP_6                                 | -424515134  | 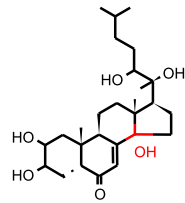<br><chem>[*]C([*])O</chem>                           | 0.275  | 39 out of 56          |
|----------------------------------------|-------------|-----------------------------------------------------------------------------------------------------------------------------------------|--------|-----------------------|
| SCFP_6                                 | 397733179   | <br><chem>[*]C1([*])([*])CC(O)C(O)C1</chem>          | 0.271  | 1 out of 1            |
| Top Features for negative contribution |             |                                                                                                                                         |        |                       |
| Fingerprint                            | Bit/Smiles  | Feature Structure                                                                                                                       | Score  | Toxic in training set |
| SCFP_6                                 | -1870530637 | <br><chem>[*]CCC(C)C</chem>                          | -0.422 | 0 out of 1            |
| SCFP_6                                 | -1043339860 | <br><chem>[*]C([*])([*])[C@H]1C[*]C1([*])[*]</chem> | -0.114 | 13 out of 28          |
| SCFP_6                                 | 13          | <br><chem>[*]=O</chem>                             | 0.000  | 81 out of 162         |

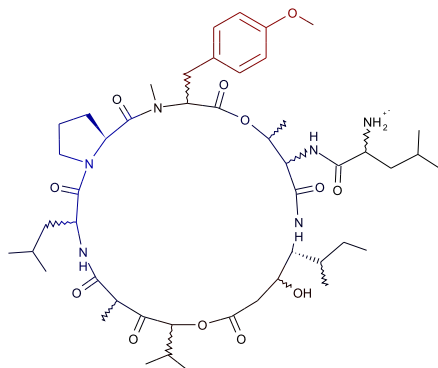

$C_{49}H_{79}N_6O_{12}$

Molecular Weight: 944.18455

ALogP: 3.176

Rotatable Bonds: 13

Acceptors: 12

Donors: 5

## Model Prediction

Prediction: Non-Toxic

Probability: 0.430

Enrichment: 0.818

Bayesian Score: -3.396

Mahalanobis Distance: 13.003

Mahalanobis Distance p-value: 4.38e-007

Prediction: Positive if the Bayesian score is above the estimated best cutoff value from minimizing the false positive and false negative rate.

Probability: The estimated probability that the sample is in the positive category. This assumes that the Bayesian score follows a normal distribution and is different from the prediction using a cutoff.

Enrichment: An estimate of enrichment, that is, the increased likelihood (versus random) of this sample being in the category.

Bayesian Score: The standard Laplacian-modified Bayesian score.

Mahalanobis Distance: The Mahalanobis distance (MD) is the distance to the center of the training data. The larger the MD, the less trustworthy the prediction.

Mahalanobis Distance p-value: The p-value gives the fraction of training data with an MD greater than or equal to the one for the given sample, assuming normally distributed data. The smaller the p-value, the less trustworthy the prediction. For highly non-normal X properties (e.g., fingerprints), the MD p-value is wildly inaccurate.

## Structural Similar Compounds

| Name               | Aclacinomycin a                | alpha-Chaconine                           | Formoterol Fumarate            |
|--------------------|--------------------------------|-------------------------------------------|--------------------------------|
| Structure          |                                |                                           |                                |
| Actual Endpoint    | Toxic                          | Toxic                                     | Toxic                          |
| Predicted Endpoint | Toxic                          | Toxic                                     | Toxic                          |
| Distance           | 0.838                          | 1.062                                     | 1.069                          |
| Reference          | Oyo Yakuri 19(5):783-790; 1980 | Toxicol Appl Pharmacol 36(2):227-37; 1976 | Oyo Yakuri 27(2):239-249; 1984 |

## Model Applicability

Unknown features are fingerprint features in the query molecule, but not found in the training set.

- OPS PC1 out of range. Value: 8.9727. Training min, max, SD, explained variance: -5.294, 7.595, 2.775, 0.1128.

## Feature Contribution

### Top features for positive contribution

| Fingerprint | Bit/Smiles  | Feature Structure                              | Score | Toxic in training set |
|-------------|-------------|------------------------------------------------|-------|-----------------------|
| SCFP_6      | -1642341584 | <br>[*]CC[c]1:[cH]:[cH]:[c](O):[c]([*]):[cH]:1 | 0.504 | 5 out of 5            |

|                                        |             |                                                                                                                                            |        |                       |
|----------------------------------------|-------------|--------------------------------------------------------------------------------------------------------------------------------------------|--------|-----------------------|
| SCFP_6                                 | -1849095515 | 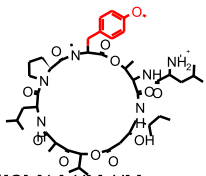<br><chem>[*]C[c]1:[cH]:[cH]:[c](OC):[cH]:[cH]:1</chem> | 0.478  | 4 out of 4            |
| SCFP_6                                 | 1237755852  | <br><chem>CO[c]1:[cH]:[cH]:[*]:[cH]:[cH]:1</chem>       | 0.453  | 8 out of 9            |
| Top Features for negative contribution |             |                                                                                                                                            |        |                       |
| Fingerprint                            | Bit/Smiles  | Feature Structure                                                                                                                          | Score  | Toxic in training set |
| SCFP_6                                 | -1026877279 | <br><chem>[*]C([*])C(C)OC(=O)C([*])[*]</chem>           | -0.718 | 0 out of 2            |
| SCFP_6                                 | -1946889102 | <br><chem>[*]N1[*][*]C[C@H]1C(=[*])[*]</chem>          | -0.512 | 4 out of 14           |
| SCFP_6                                 | 2002926168  | <br><chem>[*]CC(NC(=O)C([*])[*])C(=[*])[*]</chem>     | -0.443 | 2 out of 7            |

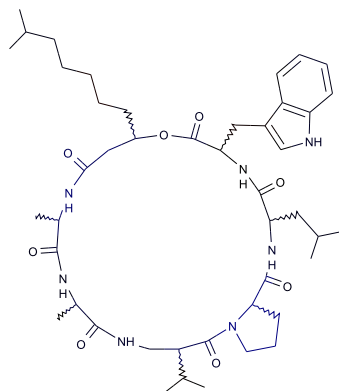

$C_{45}H_{69}N_7O_8$

Molecular Weight: 836.07145

ALogP: 4.986

Rotatable Bonds: 11

Acceptors: 8

Donors: 6

## Model Prediction

Prediction: Non-Toxic

Probability: 0.333

Enrichment: 0.633

Bayesian Score: -7.103

Mahalanobis Distance: 13.670

Mahalanobis Distance p-value: 2.1e-008

Prediction: Positive if the Bayesian score is above the estimated best cutoff value from minimizing the false positive and false negative rate.

Probability: The estimated probability that the sample is in the positive category. This assumes that the Bayesian score follows a normal distribution and is different from the prediction using a cutoff.

Enrichment: An estimate of enrichment, that is, the increased likelihood (versus random) of this sample being in the category.

Bayesian Score: The standard Laplacian-modified Bayesian score.

Mahalanobis Distance: The Mahalanobis distance (MD) is the distance to the center of the training data. The larger the MD, the less trustworthy the prediction.

Mahalanobis Distance p-value: The p-value gives the fraction of training data with an MD greater than or equal to the one for the given sample, assuming normally distributed data. The smaller the p-value, the less trustworthy the prediction. For highly non-normal X properties (e.g., fingerprints), the MD p-value is wildly inaccurate.

## Structural Similar Compounds

| Name               | Bromocriptine                 | Formoterol Fumarate            | Reserpate                   |
|--------------------|-------------------------------|--------------------------------|-----------------------------|
| Structure          |                               |                                |                             |
| Actual Endpoint    | Non-Toxic                     | Toxic                          | Toxic                       |
| Predicted Endpoint | Non-Toxic                     | Toxic                          | Toxic                       |
| Distance           | 1.002                         | 1.058                          | 1.062                       |
| Reference          | Toxicol Lett 50:189-194; 1990 | Oyo Yakuri 27(2):239-249; 1984 | Oyo Yakuri 18:105-124; 1979 |

## Model Applicability

Unknown features are fingerprint features in the query molecule, but not found in the training set.

1. All properties and OPS components are within expected ranges.

## Feature Contribution

### Top features for positive contribution

| Fingerprint | Bit/Smiles | Feature Structure                                 | Score | Toxic in training set |
|-------------|------------|---------------------------------------------------|-------|-----------------------|
| SCFP_6      | 1513450550 | <br>[*]C([*])C([c]1[nH]:[c]([*]):[c]:1: [cH]:[*]) | 0.271 | 1 out of 1            |



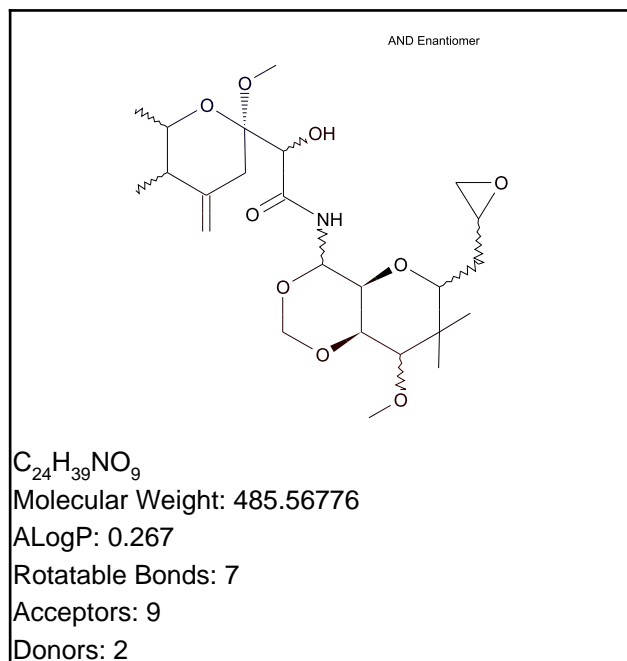

## Model Prediction

Prediction: Toxic

Probability: 0.607

Enrichment: 1.154

Bayesian Score: 1.540

Mahalanobis Distance: 9.818

Mahalanobis Distance p-value: 0.033

Prediction: Positive if the Bayesian score is above the estimated best cutoff value from minimizing the false positive and false negative rate.

Probability: The estimated probability that the sample is in the positive category. This assumes that the Bayesian score follows a normal distribution and is different from the prediction using a cutoff.

Enrichment: An estimate of enrichment, that is, the increased likelihood (versus random) of this sample being in the category.

Bayesian Score: The standard Laplacian-modified Bayesian score.

Mahalanobis Distance: The Mahalanobis distance (MD) is the distance to the center of the training data. The larger the MD, the less trustworthy the prediction.

Mahalanobis Distance p-value: The p-value gives the fraction of training data with an MD greater than or equal to the one for the given sample, assuming normally distributed data. The smaller the p-value, the less trustworthy the prediction. For highly non-normal X properties (e.g., fingerprints), the MD p-value is wildly inaccurate.

## Structural Similar Compounds

| Name               | Lenampicillin .HCl (Free base form)                                                 | Bacampicillin .HCl (Free base form)                                                 | Cyclic AMP Bucladesine                                                              |
|--------------------|-------------------------------------------------------------------------------------|-------------------------------------------------------------------------------------|-------------------------------------------------------------------------------------|
| Structure          | 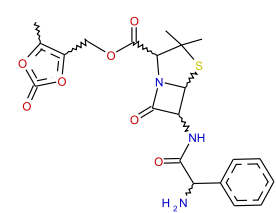 |  |  |
| Actual Endpoint    | Non-Toxic                                                                           | Toxic                                                                               | Non-Toxic                                                                           |
| Predicted Endpoint | Non-Toxic                                                                           | Non-Toxic                                                                           | Non-Toxic                                                                           |
| Distance           | 0.653                                                                               | 0.714                                                                               | 0.720                                                                               |
| Reference          | Chemotherapy 32:130-145; 1984                                                       | Chemotherapy 27:30-35; 1979                                                         | Oyo Yakuri 27(3):585-597; 1984                                                      |

## Model Applicability

Unknown features are fingerprint features in the query molecule, but not found in the training set.

1. All properties and OPS components are within expected ranges.

## Feature Contribution

### Top features for positive contribution

| Fingerprint | Bit/Smiles  | Feature Structure                                                                                                                | Score | Toxic in training set |
|-------------|-------------|----------------------------------------------------------------------------------------------------------------------------------|-------|-----------------------|
| SCFP_6      | -1485821968 | 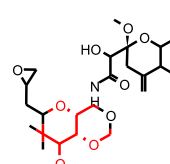<br>[*]OC1C([*])[*]C([*])C([*])C1OC([*])[*] | 0.441 | 3 out of 3            |



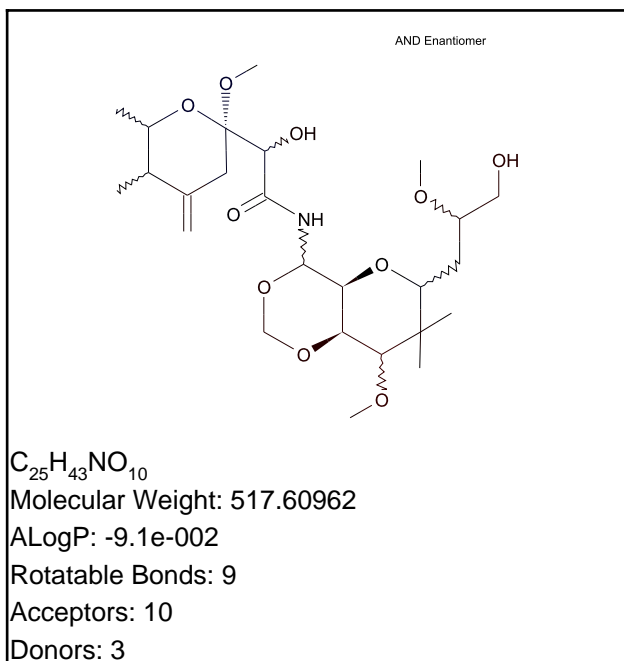

## Model Prediction

Prediction: Toxic

Probability: 0.641

Enrichment: 1.218

Bayesian Score: 2.398

Mahalanobis Distance: 9.601

Mahalanobis Distance p-value: 0.0545

Prediction: Positive if the Bayesian score is above the estimated best cutoff value from minimizing the false positive and false negative rate.

Probability: The estimated probability that the sample is in the positive category. This assumes that the Bayesian score follows a normal distribution and is different from the prediction using a cutoff.

Enrichment: An estimate of enrichment, that is, the increased likelihood (versus random) of this sample being in the category.

Bayesian Score: The standard Laplacian-modified Bayesian score.

Mahalanobis Distance: The Mahalanobis distance (MD) is the distance to the center of the training data. The larger the MD, the less trustworthy the prediction.

Mahalanobis Distance p-value: The p-value gives the fraction of training data with an MD greater than or equal to the one for the given sample, assuming normally distributed data. The smaller the p-value, the less trustworthy the prediction. For highly non-normal X properties (e.g., fingerprints), the MD p-value is wildly inaccurate.

## Structural Similar Compounds

| Name               | Bacampicillin .HCl (Free base form)                                                 | Cyclic AMP Bucladesine                                                              | Lenampicillin .HCl (Free base form)                                                 |
|--------------------|-------------------------------------------------------------------------------------|-------------------------------------------------------------------------------------|-------------------------------------------------------------------------------------|
| Structure          | 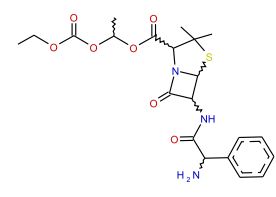 |  |  |
| Actual Endpoint    | Toxic                                                                               | Non-Toxic                                                                           | Non-Toxic                                                                           |
| Predicted Endpoint | Non-Toxic                                                                           | Non-Toxic                                                                           | Non-Toxic                                                                           |
| Distance           | 0.719                                                                               | 0.732                                                                               | 0.737                                                                               |
| Reference          | Chemotherapy 27:30-35; 1979                                                         | Oyo Yakuri 27(3):585-597; 1984                                                      | Chemotherapy 32:130-145; 1984                                                       |

## Model Applicability

Unknown features are fingerprint features in the query molecule, but not found in the training set.

1. All properties and OPS components are within expected ranges.

## Feature Contribution

### Top features for positive contribution

| Fingerprint | Bit/Smiles  | Feature Structure                                                                                                                | Score | Toxic in training set |
|-------------|-------------|----------------------------------------------------------------------------------------------------------------------------------|-------|-----------------------|
| SCFP_6      | -1485821968 | 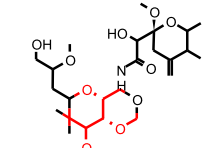<br>[*]OC1C([*])[*]C([*])C([*])C1OC([*])[*] | 0.441 | 3 out of 3            |



|                                        |            |                                                                                                                                                       |        |                       |
|----------------------------------------|------------|-------------------------------------------------------------------------------------------------------------------------------------------------------|--------|-----------------------|
| SCFP_6                                 | -188384666 | 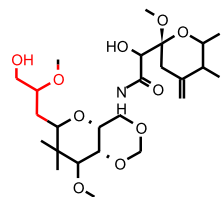<br><chem>[*]CC(CO)O[*]</chem>                                      | 0.431  | 7 out of 8            |
| SCFP_6                                 | 1702664599 | <br><chem>[*]OC(C([*])([*])C(=[*])[*])[*]</chem>                   | 0.322  | 4 out of 5            |
| Top Features for negative contribution |            |                                                                                                                                                       |        |                       |
| Fingerprint                            | Bit/Smiles | Feature Structure                                                                                                                                     | Score  | Toxic in training set |
| SCFP_6                                 | -33065173  | <br><chem>[*]CC1O[C@H](C([*])([*])[*])C([*])([*])C1([*])[*]</chem> | -0.438 | 1 out of 4            |
| SCFP_6                                 | -132795725 | <br><chem>[*]CC(O[*])(O[*])C([*])[*]</chem>                       | -0.422 | 0 out of 1            |
| SCFP_6                                 | -36419783  | <br><chem>[*]O[C@@]1(C[*])C([*])C(C)O1C([*])([*])[*]</chem>      | -0.422 | 0 out of 1            |

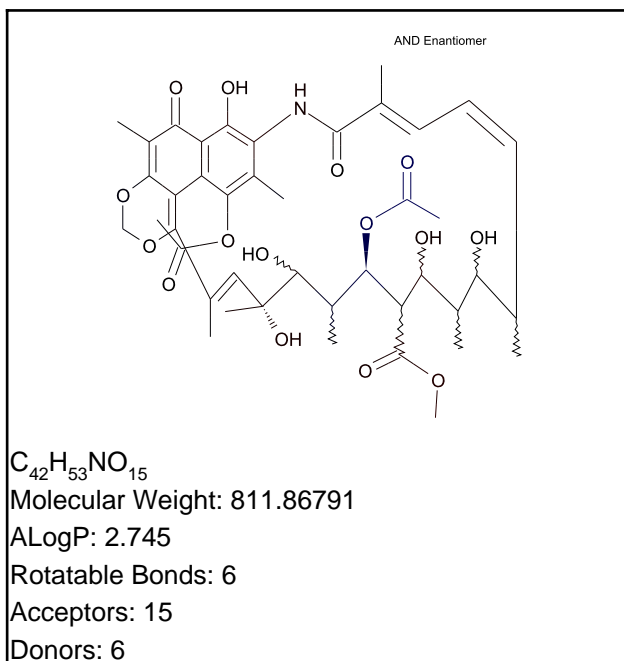

## Model Prediction

Prediction: Toxic

Probability: 0.595

Enrichment: 1.131

Bayesian Score: 1.227

Mahalanobis Distance: 17.359

Mahalanobis Distance p-value: 1.14e-016

Prediction: Positive if the Bayesian score is above the estimated best cutoff value from minimizing the false positive and false negative rate.

Probability: The estimated probability that the sample is in the positive category. This assumes that the Bayesian score follows a normal distribution and is different from the prediction using a cutoff.

Enrichment: An estimate of enrichment, that is, the increased likelihood (versus random) of this sample being in the category.

Bayesian Score: The standard Laplacian-modified Bayesian score.

Mahalanobis Distance: The Mahalanobis distance (MD) is the distance to the center of the training data. The larger the MD, the less trustworthy the prediction.

Mahalanobis Distance p-value: The p-value gives the fraction of training data with an MD greater than or equal to the one for the given sample, assuming normally distributed data. The smaller the p-value, the less trustworthy the prediction. For highly non-normal X properties (e.g., fingerprints), the MD p-value is wildly inaccurate.

## Structural Similar Compounds

| Name               | alpha-Chaconine                           | Aclacinomycin a                | Solanine                                  |
|--------------------|-------------------------------------------|--------------------------------|-------------------------------------------|
| Structure          |                                           |                                |                                           |
| Actual Endpoint    | Toxic                                     | Toxic                          | Toxic                                     |
| Predicted Endpoint | Toxic                                     | Toxic                          | Toxic                                     |
| Distance           | 0.762                                     | 0.808                          | 0.926                                     |
| Reference          | Toxicol Appl Pharmacol 36(2):227-37; 1976 | Oyo Yakuri 19(5):783-790; 1980 | Toxicol Appl Pharmacol 36(2):227-37; 1976 |

## Model Applicability

Unknown features are fingerprint features in the query molecule, but not found in the training set.

1. All properties and OPS components are within expected ranges.

## Feature Contribution

### Top features for positive contribution

| Fingerprint | Bit/Smiles  | Feature Structure    | Score | Toxic in training set |
|-------------|-------------|----------------------|-------|-----------------------|
| SCFP_6      | -1031415239 | <br>[*]C([*])C(=O)OC | 0.381 | 2 out of 2            |

|                                        |             |                                                                                                                                   |        |                       |
|----------------------------------------|-------------|-----------------------------------------------------------------------------------------------------------------------------------|--------|-----------------------|
| SCFP_6                                 | -1971196727 | 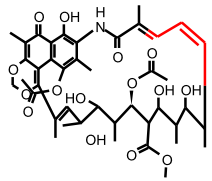<br><chem>[*]\C=C\C(=[*])[*]</chem>            | 0.293  | 13 out of 18          |
| SCFP_6                                 | -424515134  | <br><chem>[*]C([*])O</chem>                    | 0.275  | 39 out of 56          |
| Top Features for negative contribution |             |                                                                                                                                   |        |                       |
| Fingerprint                            | Bit/Smiles  | Feature Structure                                                                                                                 | Score  | Toxic in training set |
| SCFP_6                                 | 733985735   | <br><chem>[*]COC(=O)C</chem>                   | -0.945 | 0 out of 3            |
| SCFP_6                                 | -1026877279 | <br><chem>[*]C([*])C(C)OC(=O)C([*])[*]</chem> | -0.718 | 0 out of 2            |
| SCFP_6                                 | 136686699   | <br><chem>[*]:[c](:[*])C</chem>              | -0.316 | 7 out of 19           |

# Simeprevir

# TOPKAT\_Developmental\_Toxicity\_Potential

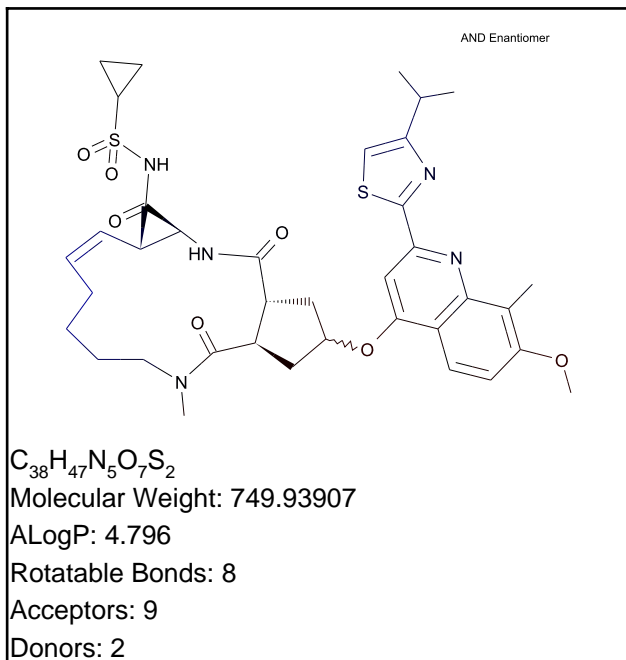

## Model Prediction

Prediction: Non-Toxic

Probability: 0.438

Enrichment: 0.833

Bayesian Score: -3.140

Mahalanobis Distance: 13.351

Mahalanobis Distance p-value: 9.2e-008

Prediction: Positive if the Bayesian score is above the estimated best cutoff value from minimizing the false positive and false negative rate.

Probability: The estimated probability that the sample is in the positive category. This assumes that the Bayesian score follows a normal distribution and is different from the prediction using a cutoff.

Enrichment: An estimate of enrichment, that is, the increased likelihood (versus random) of this sample being in the category. Bayesian Score: The standard Laplacian-modified Bayesian score.

Mahalanobis Distance: The Mahalanobis distance (MD) is the distance to the center of the training data. The larger the MD, the less trustworthy the prediction.

Mahalanobis Distance p-value: The p-value gives the fraction of training data with an MD greater than or equal to the one for the given sample, assuming normally distributed data. The smaller the p-value, the less trustworthy the prediction. For highly non-normal X properties (e.g., fingerprints), the MD p-value is wildly inaccurate.

## Structural Similar Compounds

| Name               | Reserpate                                                                           | Bromocriptine                                                                       | Estramustine Phosphate Disodium (Free acid form)                                    |
|--------------------|-------------------------------------------------------------------------------------|-------------------------------------------------------------------------------------|-------------------------------------------------------------------------------------|
| Structure          | 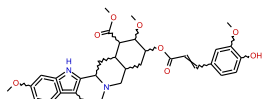 |  |  |
| Actual Endpoint    | Toxic                                                                               | Non-Toxic                                                                           | Non-Toxic                                                                           |
| Predicted Endpoint | Toxic                                                                               | Non-Toxic                                                                           | Non-Toxic                                                                           |
| Distance           | 0.675                                                                               | 0.778                                                                               | 0.819                                                                               |
| Reference          | Oyo Yakuri 18:105-124; 1979                                                         | Toxicol Lett 50:189-194; 1990                                                       | Oyo Yakuri 20(6):1219-1236; 1980                                                    |

## Model Applicability

Unknown features are fingerprint features in the query molecule, but not found in the training set.

- OPS PC12 out of range. Value: 3.5244. Training min, max, SD, explained variance: -3.7514, 3.3159, 1.318, 0.0255.

## Feature Contribution

### Top features for positive contribution

| Fingerprint | Bit/Smiles | Feature Structure                                                                                                          | Score | Toxic in training set |
|-------------|------------|----------------------------------------------------------------------------------------------------------------------------|-------|-----------------------|
| SCFP_6      | 591469355  | 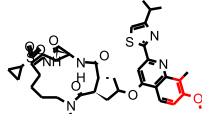<br>[*][c](:[*]):[c](OC):<br>[cH]:[*] | 0.411 | 10 out of 12          |

|                                        |             |                                                                                                                                               |        |                       |
|----------------------------------------|-------------|-----------------------------------------------------------------------------------------------------------------------------------------------|--------|-----------------------|
| SCFP_6                                 | -395254381  | 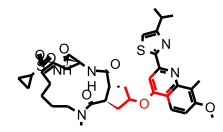<br><chem>[*]:[cH]:[c](OC1C[*])[*]C1):[c](:[*]):[*]</chem> | 0.271  | 1 out of 1            |
| SCFP_6                                 | -109092631  | <br><chem>[*]CCN(C)C(=O)C([*])[*]</chem>                   | 0.271  | 1 out of 1            |
| Top Features for negative contribution |             |                                                                                                                                               |        |                       |
| Fingerprint                            | Bit/Smiles  | Feature Structure                                                                                                                             | Score  | Toxic in training set |
| SCFP_6                                 | -98332825   | <br><chem>[*]CCCCC=[*]</chem>                              | -0.718 | 0 out of 2            |
| SCFP_6                                 | -1476112164 | <br><chem>[*]CC\C=C/C1[*][*]1</chem>                     | -0.718 | 0 out of 2            |
| SCFP_6                                 | 1260369147  | <br><chem>[*]CCC\C=C/[*]</chem>                          | -0.718 | 0 out of 2            |

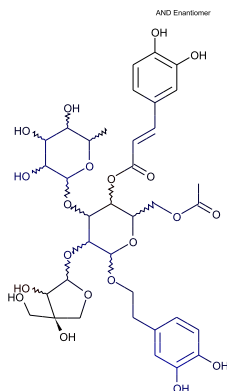

$C_{36}H_{46}O_{20}$

Molecular Weight: 798.73843

ALogP: -0.546

Rotatable Bonds: 16

Acceptors: 20

Donors: 10

## Model Prediction

Prediction: Non-Carcinogen

Probability: 0.224

Enrichment: 0.698

Bayesian Score: -11.922

Mahalanobis Distance: 19.407

Mahalanobis Distance p-value: 1.07e-016

Prediction: Positive if the Bayesian score is above the estimated best cutoff value from minimizing the false positive and false negative rate.

Probability: The estimated probability that the sample is in the positive category. This assumes that the Bayesian score follows a normal distribution and is different from the prediction using a cutoff.

Enrichment: An estimate of enrichment, that is, the increased likelihood (versus random) of this sample being in the category.

Bayesian Score: The standard Laplacian-modified Bayesian score.

Mahalanobis Distance: The Mahalanobis distance (MD) is the distance to the center of the training data. The larger the MD, the less trustworthy the prediction.

Mahalanobis Distance p-value: The p-value gives the fraction of training data with an MD greater than or equal to the one for the given sample, assuming normally distributed data. The smaller the p-value, the less trustworthy the prediction. For highly non-normal X properties (e.g., fingerprints), the MD p-value is wildly inaccurate.

## Structural Similar Compounds

| Name               | Rifampin                                                            | Netilmicin                                                          | Rifabutin                                                           |
|--------------------|---------------------------------------------------------------------|---------------------------------------------------------------------|---------------------------------------------------------------------|
| Structure          |                                                                     |                                                                     |                                                                     |
| Actual Endpoint    | Carcinogen                                                          | Non-Carcinogen                                                      | Non-Carcinogen                                                      |
| Predicted Endpoint | Carcinogen                                                          | Non-Carcinogen                                                      | Non-Carcinogen                                                      |
| Distance           | 1.505                                                               | 1.527                                                               | 1.649                                                               |
| Reference          | US FDA (Centre for Drug Eval.& Res./Off. Testing & Res.) Sept. 1997 | US FDA (Centre for Drug Eval.& Res./Off. Testing & Res.) Sept. 1997 | US FDA (Centre for Drug Eval.& Res./Off. Testing & Res.) Sept. 1997 |

## Model Applicability

Unknown features are fingerprint features in the query molecule, but not found in the training set.

1. Num\_H\_Donors out of range. Value: 10. Training min, max, mean, SD: 0, 8, 1.7372, 1.457.
2. Num\_H\_Acceptors out of range. Value: 20. Training min, max, mean, SD: 0, 15, 4.2436, 2.443.
3. OPS PC2 out of range. Value: 7.5498. Training min, max, SD, explained variance: -7.2665, 6.2932, 2.637, 0.0707.
4. Unknown ECFP\_2 feature: 1953003528: [\*]C[C@@]1(O)C[\*][\*]C1[\*]
5. Unknown ECFP\_2 feature: -176483725: [\*]=C[c](:c:[\*]):c:[\*]

## Feature Contribution

### Top features for positive contribution

| Fingerprint | Bit/Smiles | Feature Structure                     | Score | Carcinogen in training set |
|-------------|------------|---------------------------------------|-------|----------------------------|
| ECFP_6      | 456978524  | <br><chem>[*]C([*])OC(=[*])[*]</chem> | 0.529 | 7 out of 12                |

|                                        |             |                                                                                                                                          |        |                            |
|----------------------------------------|-------------|------------------------------------------------------------------------------------------------------------------------------------------|--------|----------------------------|
| ECFP_6                                 | -521596699  | <p>AND Enantiomer</p> 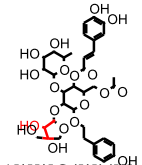 <p>[*]C1[*]C([*])C([*])C1O</p> | 0.451  | 3 out of 5                 |
| ECFP_6                                 | -1925046727 | <p>AND Enantiomer</p>  <p>[*]C=[*]</p>                | 0.391  | 11 out of 23               |
| Top Features for negative contribution |             |                                                                                                                                          |        |                            |
| Fingerprint                            | Bit/Smiles  | Feature Structure                                                                                                                        | Score  | Carcinogen in training set |
| ECFP_6                                 | -1831055759 | <p>AND Enantiomer</p>  <p>[*]C=C\c([*])[*]</p>        | -0.805 | 0 out of 4                 |
| ECFP_6                                 | 456242574   | <p>AND Enantiomer</p>  <p>[*]C([*])OC([*])[*]</p>   | -0.805 | 0 out of 4                 |
| ECFP_6                                 | -2060414325 | <p>AND Enantiomer</p>  <p>[*]OC(O[*])C([*])[*]</p>  | -0.657 | 0 out of 3                 |

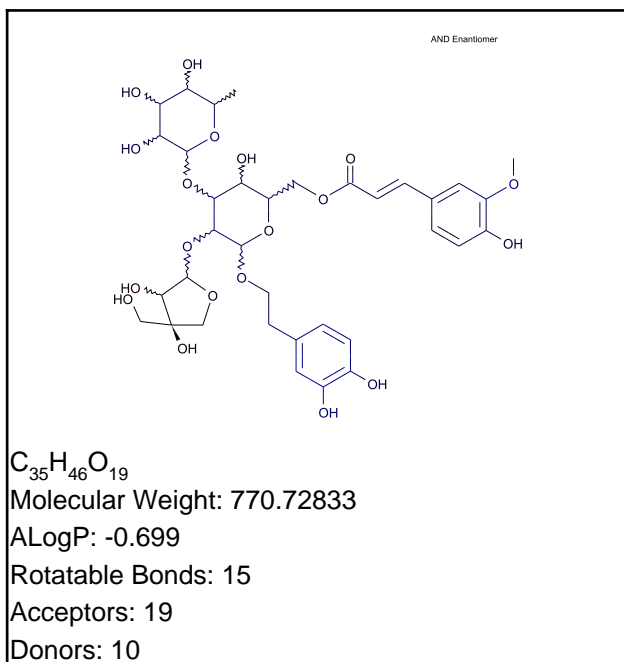

### Model Prediction

Prediction: Non-Carcinogen

Probability: 0.207

Enrichment: 0.646

Bayesian Score: -14.043

Mahalanobis Distance: 19.037

Mahalanobis Distance p-value: 7.51e-016

Prediction: Positive if the Bayesian score is above the estimated best cutoff value from minimizing the false positive and false negative rate.

Probability: The estimated probability that the sample is in the positive category. This assumes that the Bayesian score follows a normal distribution and is different from the prediction using a cutoff.

Enrichment: An estimate of enrichment, that is, the increased likelihood (versus random) of this sample being in the category. Bayesian Score: The standard Laplacian-modified Bayesian score.

Mahalanobis Distance: The Mahalanobis distance (MD) is the distance to the center of the training data. The larger the MD, the less trustworthy the prediction.

Mahalanobis Distance p-value: The p-value gives the fraction of training data with an MD greater than or equal to the one for the given sample, assuming normally distributed data. The smaller the p-value, the less trustworthy the prediction. For highly non-normal X properties (e.g., fingerprints), the MD p-value is wildly inaccurate.

### Structural Similar Compounds

| Name               | Netilmicin                                                                          | Rifampin                                                                            | Rifabutin                                                                           |
|--------------------|-------------------------------------------------------------------------------------|-------------------------------------------------------------------------------------|-------------------------------------------------------------------------------------|
| Structure          | 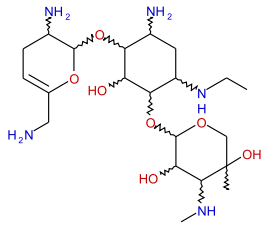 |  |  |
| Actual Endpoint    | Non-Carcinogen                                                                      | Carcinogen                                                                          | Non-Carcinogen                                                                      |
| Predicted Endpoint | Non-Carcinogen                                                                      | Carcinogen                                                                          | Non-Carcinogen                                                                      |
| Distance           | 1.420                                                                               | 1.447                                                                               | 1.594                                                                               |
| Reference          | US FDA (Centre for Drug Eval.& Res./Off. Testing & Res.) Sept. 1997                 | US FDA (Centre for Drug Eval.& Res./Off. Testing & Res.) Sept. 1997                 | US FDA (Centre for Drug Eval.& Res./Off. Testing & Res.) Sept. 1997                 |

### Model Applicability

Unknown features are fingerprint features in the query molecule, but not found in the training set.

1. Num\_H\_Donors out of range. Value: 10. Training min, max, mean, SD: 0, 8, 1.7372, 1.457.
2. Num\_H\_Acceptors out of range. Value: 19. Training min, max, mean, SD: 0, 15, 4.2436, 2.443.
3. OPS PC2 out of range. Value: 7.9262. Training min, max, SD, explained variance: -7.2665, 6.2932, 2.637, 0.0707.
4. OPS PC4 out of range. Value: 5.2279. Training min, max, SD, explained variance: -4.7116, 4.7287, 2.103, 0.0450.
5. Unknown ECFP\_2 feature: 1953003528: [\*]C[C@@]1(O)C[\*][\*]C1[\*]
6. Unknown ECFP\_2 feature: -176483725: [\*]=C[c](:c:[\*]):c:[\*]

### Feature Contribution

#### Top features for positive contribution

| Fingerprint | Bit/Smiles | Feature Structure | Score | Carcinogen in training set |
|-------------|------------|-------------------|-------|----------------------------|
|-------------|------------|-------------------|-------|----------------------------|



|                                        |             |                                                                                                                               |        |                            |
|----------------------------------------|-------------|-------------------------------------------------------------------------------------------------------------------------------|--------|----------------------------|
| ECFP_6                                 | -521596699  | 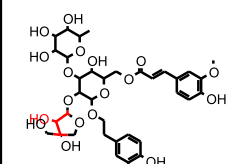<br><chem>[*]C1[*][*]C([*])([*])C1O</chem> | 0.451  | 3 out of 5                 |
| ECFP_6                                 | -1925046727 | <br><chem>[*]C=[*]</chem>                  | 0.391  | 11 out of 23               |
| ECFP_6                                 | 865482986   | <br><chem>[*]C([*])C</chem>                | 0.350  | 7 out of 15                |
| Top Features for negative contribution |             |                                                                                                                               |        |                            |
| Fingerprint                            | Bit/Smiles  | Feature Structure                                                                                                             | Score  | Carcinogen in training set |
| ECFP_6                                 | 456242574   | <br><chem>[*]C([*])OC([*])[*]</chem>      | -0.805 | 0 out of 4                 |
| ECFP_6                                 | -1831055759 | <br><chem>[*]C=C\[c]([*]):[*]</chem>     | -0.805 | 0 out of 4                 |

ECFP\_6

-470416293

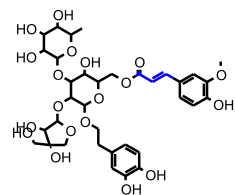

-0.657

0 out of 3

[\*]C=C\C(=[\*])[\*]

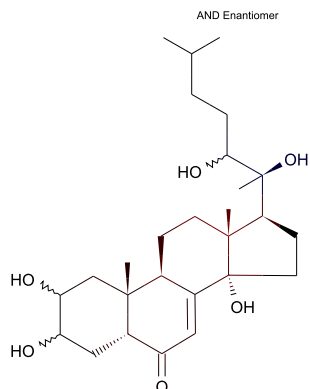
 $C_{27}H_{44}O_6$ 

Molecular Weight: 464.63466

ALogP: 2.489

Rotatable Bonds: 5

Acceptors: 6

Donors: 5

## Model Prediction

**Prediction: Carcinogen**

Probability: 0.280

Enrichment: 0.873

Bayesian Score: 0.777

Mahalanobis Distance: 15.625

Mahalanobis Distance p-value: 1.58e-008

Prediction: Positive if the Bayesian score is above the estimated best cutoff value from minimizing the false positive and false negative rate.

Probability: The estimated probability that the sample is in the positive category. This assumes that the Bayesian score follows a normal distribution and is different from the prediction using a cutoff.

Enrichment: An estimate of enrichment, that is, the increased likelihood (versus random) of this sample being in the category.

Bayesian Score: The standard Laplacian-modified Bayesian score.

Mahalanobis Distance: The Mahalanobis distance (MD) is the distance to the center of the training data. The larger the MD, the less trustworthy the prediction.

Mahalanobis Distance p-value: The p-value gives the fraction of training data with an MD greater than or equal to the one for the given sample, assuming normally distributed data. The smaller the p-value, the less trustworthy the prediction. For highly non-normal X properties (e.g., fingerprints), the MD p-value is wildly inaccurate.

## Structural Similar Compounds

| Name               | Triamcinolone                                                       | Budesonide                                                          | Nadolol                                                             |
|--------------------|---------------------------------------------------------------------|---------------------------------------------------------------------|---------------------------------------------------------------------|
| Structure          |                                                                     |                                                                     |                                                                     |
| Actual Endpoint    | Carcinogen                                                          | Non-Carcinogen                                                      | Non-Carcinogen                                                      |
| Predicted Endpoint | Carcinogen                                                          | Non-Carcinogen                                                      | Non-Carcinogen                                                      |
| Distance           | 0.764                                                               | 0.785                                                               | 0.789                                                               |
| Reference          | US FDA (Centre for Drug Eval.& Res./Off. Testing & Res.) Sept. 1997 | US FDA (Centre for Drug Eval.& Res./Off. Testing & Res.) Sept. 1997 | US FDA (Centre for Drug Eval.& Res./Off. Testing & Res.) Sept. 1997 |

## Model Applicability

Unknown features are fingerprint features in the query molecule, but not found in the training set.

1. OPS PC31 out of range. Value: -2.7471. Training min, max, SD, explained variance: -2.3769, 4.158, 0.968, 0.0095.
2. Unknown ECFP\_2 feature: -483166673: [\*]C(=[\*])[C@]1(O)C[\*][\*]C1([\*])[\*]
3. Unknown ECFP\_2 feature: -1049278438: [\*]C([\*])([\*])[C@H]1C[\*][\*]C1([\*])[\*]
4. Unknown ECFP\_2 feature: 1195714366: [\*]C([\*])C(C)(O)C([\*])[\*]
5. Unknown ECFP\_2 feature: -211745668: [\*]C([\*])C(=O)C=[\*]
6. Unknown ECFP\_2 feature: 80071435: [\*]CC(O)C([\*])([\*])[\*]

## Feature Contribution

### Top features for positive contribution

| Fingerprint | Bit/Smiles | Feature Structure | Score | Carcinogen in training set |
|-------------|------------|-------------------|-------|----------------------------|
|             |            |                   |       |                            |

|                                        |             |                                                                                                                                                  |        |                            |
|----------------------------------------|-------------|--------------------------------------------------------------------------------------------------------------------------------------------------|--------|----------------------------|
| ECFP_6                                 | -84975114   | 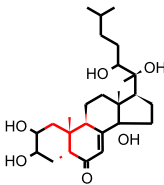<br><chem>[*]CC(C)(C([*])([*])C([*])([*])</chem>               | 0.700  | 6 out of 8                 |
| ECFP_6                                 | 1908990050  | <br><chem>[*]C[C@]1(C)(C)[C@@H]([*])C1([*])C1([*])[*]</chem>  | 0.700  | 6 out of 8                 |
| ECFP_6                                 | -565844211  | <br><chem>[*]C@@H1[*]C@2([*])C1([*])C@H([*])C@@2(C)CC1</chem> | 0.675  | 4 out of 5                 |
| Top Features for negative contribution |             |                                                                                                                                                  |        |                            |
| Fingerprint                            | Bit/Smiles  | Feature Structure                                                                                                                                | Score  | Carcinogen in training set |
| ECFP_6                                 | 2025123907  | <br><chem>[*]C([*])([*])O</chem>                             | -1.049 | 0 out of 6                 |
| ECFP_6                                 | -1910270391 | <br><chem>[*]C([*])[*]</chem>                               | -0.307 | 20 out of 89               |

|        |           |                                                                                                                             |        |            |
|--------|-----------|-----------------------------------------------------------------------------------------------------------------------------|--------|------------|
| ECFP_6 | 333674688 | 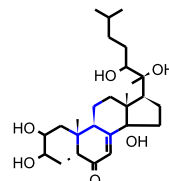<br><chem>[*]C[C@@H](C(=O)O)C(=O)O</chem> | -0.270 | 0 out of 1 |
|--------|-----------|-----------------------------------------------------------------------------------------------------------------------------|--------|------------|

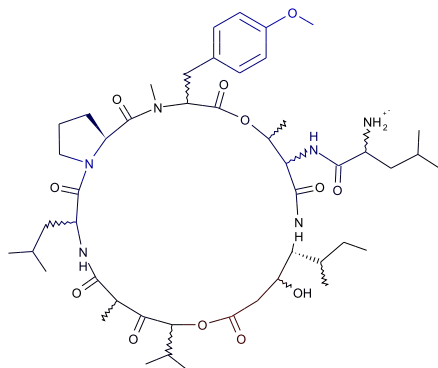

$C_{49}H_{79}N_6O_{12}$

Molecular Weight: 944.18455

ALogP: 3.176

Rotatable Bonds: 13

Acceptors: 12

Donors: 5

## Model Prediction

Prediction: Non-Carcinogen

Probability: 0.206

Enrichment: 0.644

Bayesian Score: -14.119

Mahalanobis Distance: 17.887

Mahalanobis Distance p-value: 2.87e-013

Prediction: Positive if the Bayesian score is above the estimated best cutoff value from minimizing the false positive and false negative rate.

Probability: The estimated probability that the sample is in the positive category. This assumes that the Bayesian score follows a normal distribution and is different from the prediction using a cutoff.

Enrichment: An estimate of enrichment, that is, the increased likelihood (versus random) of this sample being in the category. Bayesian Score: The standard Laplacian-modified Bayesian score.

Mahalanobis Distance: The Mahalanobis distance (MD) is the distance to the center of the training data. The larger the MD, the less trustworthy the prediction.

Mahalanobis Distance p-value: The p-value gives the fraction of training data with an MD greater than or equal to the one for the given sample, assuming normally distributed data. The smaller the p-value, the less trustworthy the prediction. For highly non-normal X properties (e.g., fingerprints), the MD p-value is wildly inaccurate.

## Structural Similar Compounds

| Name               | Erythromycin                                                        | Rifabutin                                                           | Rifampin                                                            |
|--------------------|---------------------------------------------------------------------|---------------------------------------------------------------------|---------------------------------------------------------------------|
| Structure          |                                                                     |                                                                     |                                                                     |
| Actual Endpoint    | Non-Carcinogen                                                      | Non-Carcinogen                                                      | Carcinogen                                                          |
| Predicted Endpoint | Non-Carcinogen                                                      | Non-Carcinogen                                                      | Carcinogen                                                          |
| Distance           | 1.004                                                               | 1.004                                                               | 1.067                                                               |
| Reference          | US FDA (Centre for Drug Eval.& Res./Off. Testing & Res.) Sept. 1997 | US FDA (Centre for Drug Eval.& Res./Off. Testing & Res.) Sept. 1997 | US FDA (Centre for Drug Eval.& Res./Off. Testing & Res.) Sept. 1997 |

## Model Applicability

Unknown features are fingerprint features in the query molecule, but not found in the training set.

1. Molecular\_Weight out of range. Value: 944.18. Training min, max, mean, SD: 46.068, 847, 305.71, 119.
2. OPS PC2 out of range. Value: 6.7492. Training min, max, SD, explained variance: -7.2665, 6.2932, 2.637, 0.0707.
3. OPS PC4 out of range. Value: 4.8988. Training min, max, SD, explained variance: -4.7116, 4.7287, 2.103, 0.0450.
4. Unknown ECFP\_2 feature: -591526139: [\*][NH2+][\*]
5. Unknown ECFP\_2 feature: 1352327988: [\*]C([\*])[NH2+]C
6. Unknown ECFP\_2 feature: 1691770380: [\*]NC(C([\*])[\*])C([\*])[\*]
7. Unknown ECFP\_2 feature: 771121623: [\*]C([\*])C(c):[\*]:[\*]
8. Unknown ECFP\_2 feature: -714938792: [\*]C(=[\*])C(C)C(=[\*])[\*]
9. Unknown ECFP\_2 feature: 20550775: [\*]CC([NH2+][\*])C(=[\*])[\*]
10. Unknown ECFP\_2 feature: 866401773: [\*][NH2+]C

## Feature Contribution

### Top features for positive contribution

| Fingerprint | Bit/Smiles | Feature Structure | Score | Carcinogen in training set |
|-------------|------------|-------------------|-------|----------------------------|
|             |            |                   |       |                            |

| ECFP_6                                 | -2058379036 | 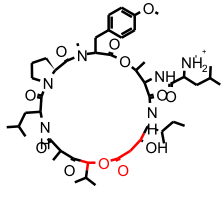<br><chem>[*]C([*])CC(=O)OC([*])</chem>                  | 0.617  | 2 out of 2                 |
|----------------------------------------|-------------|---------------------------------------------------------------------------------------------------------------------------------------------|--------|----------------------------|
| ECFP_6                                 | -1887539559 | <br><chem>[*]CC(=O)O[*]</chem>                           | 0.617  | 2 out of 2                 |
| ECFP_6                                 | 1617733200  | <br><chem>[*]C([*])N(C)C(=[*])</chem>                    | 0.424  | 1 out of 1                 |
| Top Features for negative contribution |             |                                                                                                                                             |        |                            |
| Fingerprint                            | Bit/Smiles  | Feature Structure                                                                                                                           | Score  | Carcinogen in training set |
| ECFP_6                                 | -484970154  | <br><chem>[*]N1[*][*]C[C@H]1C(=[*])</chem>              | -0.805 | 0 out of 4                 |
| ECFP_6                                 | 693720869   | <br><chem>[*][c]1:[cH]:[cH]:[c](OC):[cH]:[cH]:1</chem> | -0.805 | 0 out of 4                 |

ECFP\_6

-1271104377

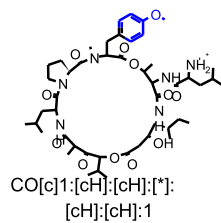

-0.805

0 out of 4



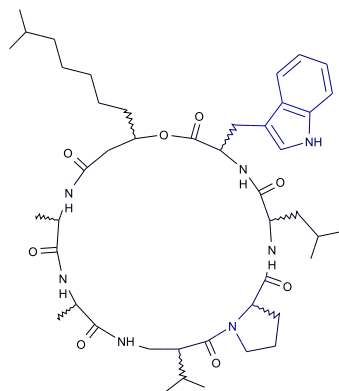

$C_{45}H_{69}N_7O_8$

Molecular Weight: 836.07145

ALogP: 4.986

Rotatable Bonds: 11

Acceptors: 8

Donors: 6

## Model Prediction

Prediction: Non-Carcinogen

Probability: 0.227

Enrichment: 0.708

Bayesian Score: -10.323

Mahalanobis Distance: 17.509

Mahalanobis Distance p-value: 1.92e-012

Prediction: Positive if the Bayesian score is above the estimated best cutoff value from minimizing the false positive and false negative rate.

Probability: The estimated probability that the sample is in the positive category. This assumes that the Bayesian score follows a normal distribution and is different from the prediction using a cutoff.

Enrichment: An estimate of enrichment, that is, the increased likelihood (versus random) of this sample being in the category.

Bayesian Score: The standard Laplacian-modified Bayesian score.

Mahalanobis Distance: The Mahalanobis distance (MD) is the distance to the center of the training data. The larger the MD, the less trustworthy the prediction.

Mahalanobis Distance p-value: The p-value gives the fraction of training data with an MD greater than or equal to the one for the given sample, assuming normally distributed data. The smaller the p-value, the less trustworthy the prediction. For highly non-normal X properties (e.g., fingerprints), the MD p-value is wildly inaccurate.

## Structural Similar Compounds

| Name               | Erythromycin                                                        | Bromocriptine                                                       | Rifabutin                                                           |
|--------------------|---------------------------------------------------------------------|---------------------------------------------------------------------|---------------------------------------------------------------------|
| Structure          |                                                                     |                                                                     |                                                                     |
| Actual Endpoint    | Non-Carcinogen                                                      | Non-Carcinogen                                                      | Non-Carcinogen                                                      |
| Predicted Endpoint | Non-Carcinogen                                                      | Non-Carcinogen                                                      | Non-Carcinogen                                                      |
| Distance           | 1.091                                                               | 1.098                                                               | 1.113                                                               |
| Reference          | US FDA (Centre for Drug Eval.& Res./Off. Testing & Res.) Sept. 1997 | US FDA (Centre for Drug Eval.& Res./Off. Testing & Res.) Sept. 1997 | US FDA (Centre for Drug Eval.& Res./Off. Testing & Res.) Sept. 1997 |

## Model Applicability

Unknown features are fingerprint features in the query molecule, but not found in the training set.

1. All properties and OPS components are within expected ranges.
2. Unknown ECFP\_2 feature: 771121623: [\*]C([\*])C[c](:[\*]):[\*]
3. Unknown ECFP\_2 feature: 1863041499: [\*]NC(C)C(=[\*])[\*]
4. Unknown ECFP\_2 feature: -2096927833: [\*]CC(C([\*])[\*])C(=[\*])[\*]

## Feature Contribution

### Top features for positive contribution

| Fingerprint | Bit/Smiles  | Feature Structure | Score | Carcinogen in training set |
|-------------|-------------|-------------------|-------|----------------------------|
| ECFP_6      | -1291950249 | <br>[*]CCCC(C)C   | 0.424 | 1 out of 1                 |

| ECFP_6                                 | -745187652  | 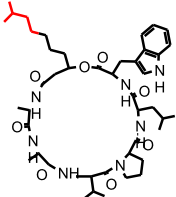<br>[*]CCC(C)C                                                 | 0.424  | 1 out of 1                 |
|----------------------------------------|-------------|---------------------------------------------------------------------------------------------------------------------------------------------------|--------|----------------------------|
| ECFP_6                                 | -953984246  | <br>[*]:[c]1:[*]:[*]:[cH]<br>:[nH]:1                           | 0.364  | 4 out of 8                 |
| Top Features for negative contribution |             |                                                                                                                                                   |        |                            |
| Fingerprint                            | Bit/Smiles  | Feature Structure                                                                                                                                 | Score  | Carcinogen in training set |
| ECFP_6                                 | -484970154  | <br>[*]N1[*][*]C[C@H]1C(=[*])[*]                               | -0.805 | 0 out of 4                 |
| ECFP_6                                 | -1659633832 | <br>[*][c]1:[cH]:[cH]:[c]<br>2:[cH]:[cH]:[*]:[cH]<br>:[c]:1:2 | -0.657 | 0 out of 3                 |
| ECFP_6                                 | 1526862590  | <br>[*]C([*])C(=O)N([*])[*]                                  | -0.638 | 1 out of 9                 |

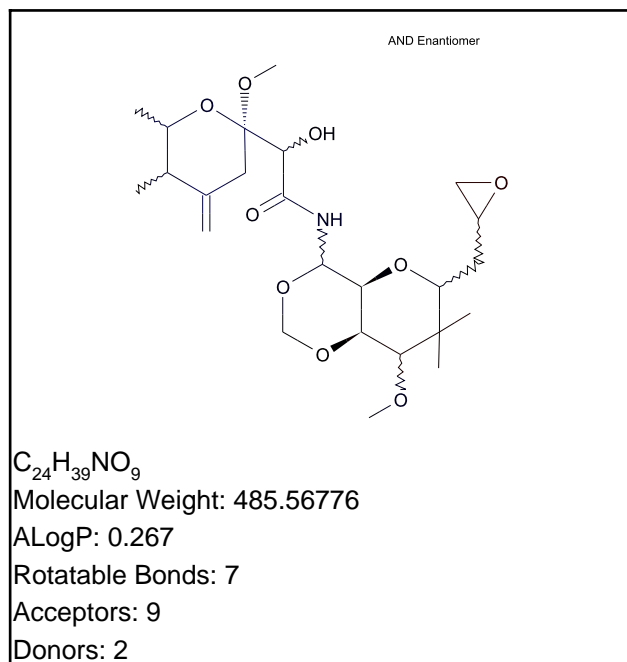

## Model Prediction

Prediction: Non-Carcinogen

Probability: 0.211

Enrichment: 0.657

Bayesian Score: -4.217

Mahalanobis Distance: 16.163

Mahalanobis Distance p-value: 1.33e-009

Prediction: Positive if the Bayesian score is above the estimated best cutoff value from minimizing the false positive and false negative rate.

Probability: The estimated probability that the sample is in the positive category. This assumes that the Bayesian score follows a normal distribution and is different from the prediction using a cutoff.

Enrichment: An estimate of enrichment, that is, the increased likelihood (versus random) of this sample being in the category. Bayesian Score: The standard Laplacian-modified Bayesian score.

Mahalanobis Distance: The Mahalanobis distance (MD) is the distance to the center of the training data. The larger the MD, the less trustworthy the prediction.

Mahalanobis Distance p-value: The p-value gives the fraction of training data with an MD greater than or equal to the one for the given sample, assuming normally distributed data. The smaller the p-value, the less trustworthy the prediction. For highly non-normal X properties (e.g., fingerprints), the MD p-value is wildly inaccurate.

## Structural Similar Compounds

| Name               | Bacampicillin                                                                       | Budesonide                                                                          | Amlodipine                                                                          |
|--------------------|-------------------------------------------------------------------------------------|-------------------------------------------------------------------------------------|-------------------------------------------------------------------------------------|
| Structure          | 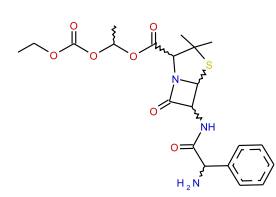 |  |  |
| Actual Endpoint    | Non-Carcinogen                                                                      | Non-Carcinogen                                                                      | Non-Carcinogen                                                                      |
| Predicted Endpoint | Non-Carcinogen                                                                      | Non-Carcinogen                                                                      | Non-Carcinogen                                                                      |
| Distance           | 0.713                                                                               | 0.765                                                                               | 0.775                                                                               |
| Reference          | US FDA (Centre for Drug Eval.& Res./Off. Testing & Res.) Sept. 1997                 | US FDA (Centre for Drug Eval.& Res./Off. Testing & Res.) Sept. 1997                 | US FDA (Centre for Drug Eval.& Res./Off. Testing & Res.) Sept. 1997                 |

## Model Applicability

Unknown features are fingerprint features in the query molecule, but not found in the training set.

1. All properties and OPS components are within expected ranges.
2. Unknown ECFP\_2 feature: -457637478: [\*]NC(O[\*])C([\*])[\*]
3. Unknown ECFP\_2 feature: 837844420: [\*]CC(O[\*])(O[\*])C([\*])[\*]
4. Unknown ECFP\_2 feature: 825070174: [\*]C(=[\*])C(O)C([\*])([\*])[\*]

## Feature Contribution

### Top features for positive contribution

| Fingerprint | Bit/Smiles | Feature Structure                                                                                               | Score | Carcinogen in training set |
|-------------|------------|-----------------------------------------------------------------------------------------------------------------|-------|----------------------------|
| ECFP_6      | 728225615  | 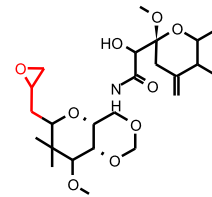<br><chem>[*]CC1CO1</chem> | 0.424 | 1 out of 1                 |

| ECFP_6                                 | 859433814   | 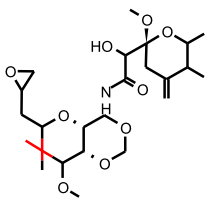<br>[*]C([*])([*])C            | 0.408  | 14 out of 29               |
|----------------------------------------|-------------|------------------------------------------------------------------------------------------------------------------|--------|----------------------------|
| ECFP_6                                 | -554480104  | <br>[*]CC(C[*])O[*]           | 0.364  | 4 out of 8                 |
| Top Features for negative contribution |             |                                                                                                                  |        |                            |
| Fingerprint                            | Bit/Smiles  | Feature Structure                                                                                                | Score  | Carcinogen in training set |
| ECFP_6                                 | 407900312   | <br>[*]C(=[*])CC([*])([*])[*] | -0.657 | 0 out of 3                 |
| ECFP_6                                 | -2091181441 | <br>[*]C([*])NC(=[*])[*]     | -0.638 | 1 out of 9                 |
| ECFP_6                                 | 1535429263  | <br>[*]OC(C)C([*])[*]       | -0.482 | 0 out of 2                 |

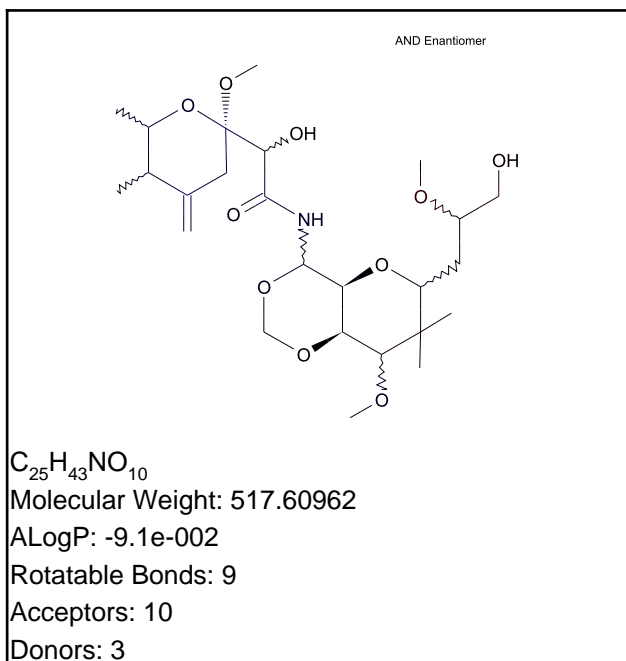

### Model Prediction

Prediction: Non-Carcinogen

Probability: 0.209

Enrichment: 0.652

Bayesian Score: -4.513

Mahalanobis Distance: 15.242

Mahalanobis Distance p-value: 8.68e-008

Prediction: Positive if the Bayesian score is above the estimated best cutoff value from minimizing the false positive and false negative rate.

Probability: The estimated probability that the sample is in the positive category. This assumes that the Bayesian score follows a normal distribution and is different from the prediction using a cutoff.

Enrichment: An estimate of enrichment, that is, the increased likelihood (versus random) of this sample being in the category.

Bayesian Score: The standard Laplacian-modified Bayesian score.

Mahalanobis Distance: The Mahalanobis distance (MD) is the distance to the center of the training data. The larger the MD, the less trustworthy the prediction.

Mahalanobis Distance p-value: The p-value gives the fraction of training data with an MD greater than or equal to the one for the given sample, assuming normally distributed data. The smaller the p-value, the less trustworthy the prediction. For highly non-normal X properties (e.g., fingerprints), the MD p-value is wildly inaccurate.

### Structural Similar Compounds

| Name               | Bacampicillin                                                                       | Amlodipine                                                                          | Dipyridamole                                                                        |
|--------------------|-------------------------------------------------------------------------------------|-------------------------------------------------------------------------------------|-------------------------------------------------------------------------------------|
| Structure          | 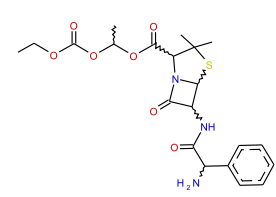 |  |  |
| Actual Endpoint    | Non-Carcinogen                                                                      | Non-Carcinogen                                                                      | Non-Carcinogen                                                                      |
| Predicted Endpoint | Non-Carcinogen                                                                      | Non-Carcinogen                                                                      | Non-Carcinogen                                                                      |
| Distance           | 0.729                                                                               | 0.851                                                                               | 0.853                                                                               |
| Reference          | US FDA (Centre for Drug Eval.& Res./Off. Testing & Res.) Sept. 1997                 | US FDA (Centre for Drug Eval.& Res./Off. Testing & Res.) Sept. 1997                 | US FDA (Centre for Drug Eval.& Res./Off. Testing & Res.) Sept. 1997                 |

### Model Applicability

Unknown features are fingerprint features in the query molecule, but not found in the training set.

1. All properties and OPS components are within expected ranges.
2. Unknown ECFP\_2 feature: -410173153: [\*]C([\*])OC
3. Unknown ECFP\_2 feature: -457637478: [\*]NC(O[\*])C([\*])[\*]
4. Unknown ECFP\_2 feature: 837844420: [\*]CC(O[\*])(O[\*])C([\*])[\*]
5. Unknown ECFP\_2 feature: 825070174: [\*]C(=[\*])C(O)C([\*])([\*])[\*]

### Feature Contribution

#### Top features for positive contribution

| Fingerprint | Bit/Smiles | Feature Structure                                                                                      | Score | Carcinogen in training set |
|-------------|------------|--------------------------------------------------------------------------------------------------------|-------|----------------------------|
| ECFP_6      | 1066876733 | 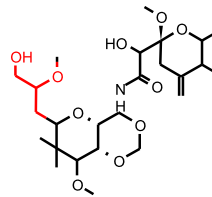<br>[*]CC(CO)O[*] | 0.424 | 1 out of 1                 |

| ECFP_6                                 | 197414153   | 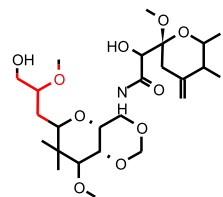<br><chem>[*]CC(C[*])O[*]</chem>            | 0.424  | 1 out of 1                 |
|----------------------------------------|-------------|-------------------------------------------------------------------------------------------------------------------------------|--------|----------------------------|
| ECFP_6                                 | 859433814   | <br><chem>[*]C([*])([*])C</chem>           | 0.408  | 14 out of 29               |
| Top Features for negative contribution |             |                                                                                                                               |        |                            |
| Fingerprint                            | Bit/Smiles  | Feature Structure                                                                                                             | Score  | Carcinogen in training set |
| ECFP_6                                 | 407900312   | <br><chem>[*]C(=[*])CC([*])([*])[*]</chem> | -0.657 | 0 out of 3                 |
| ECFP_6                                 | -2091181441 | <br><chem>[*]C([*])NC(=[*])[*]</chem>     | -0.638 | 1 out of 9                 |
| ECFP_6                                 | -89681466   | <br><chem>[*]OCO[*]</chem>               | -0.482 | 0 out of 2                 |

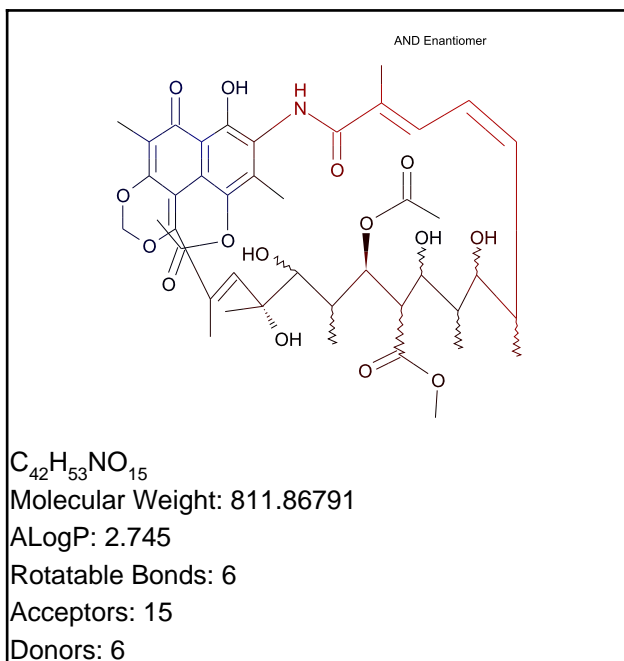

## Model Prediction

**Prediction: Carcinogen**

Probability: 0.321

Enrichment: 1.000

Bayesian Score: 2.288

Mahalanobis Distance: 11.738

Mahalanobis Distance p-value: 0.0211

Prediction: Positive if the Bayesian score is above the estimated best cutoff value from minimizing the false positive and false negative rate.

Probability: The estimated probability that the sample is in the positive category. This assumes that the Bayesian score follows a normal distribution and is different from the prediction using a cutoff.

Enrichment: An estimate of enrichment, that is, the increased likelihood (versus random) of this sample being in the category.

Bayesian Score: The standard Laplacian-modified Bayesian score.

Mahalanobis Distance: The Mahalanobis distance (MD) is the distance to the center of the training data. The larger the MD, the less trustworthy the prediction.

Mahalanobis Distance p-value: The p-value gives the fraction of training data with an MD greater than or equal to the one for the given sample, assuming normally distributed data. The smaller the p-value, the less trustworthy the prediction. For highly non-normal X properties (e.g., fingerprints), the MD p-value is wildly inaccurate.

## Structural Similar Compounds

| Name               | Rifampin                                                                            | Rifabutin                                                                           | Erythromycin                                                                        |
|--------------------|-------------------------------------------------------------------------------------|-------------------------------------------------------------------------------------|-------------------------------------------------------------------------------------|
| Structure          | 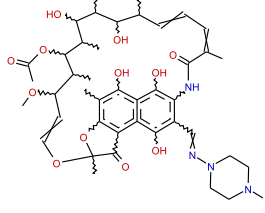 |  |  |
| Actual Endpoint    | Carcinogen                                                                          | Non-Carcinogen                                                                      | Non-Carcinogen                                                                      |
| Predicted Endpoint | Carcinogen                                                                          | Non-Carcinogen                                                                      | Non-Carcinogen                                                                      |
| Distance           | 0.453                                                                               | 0.596                                                                               | 0.829                                                                               |
| Reference          | US FDA (Centre for Drug Eval.& Res./Off. Testing & Res.) Sept. 1997                 | US FDA (Centre for Drug Eval.& Res./Off. Testing & Res.) Sept. 1997                 | US FDA (Centre for Drug Eval.& Res./Off. Testing & Res.) Sept. 1997                 |

## Model Applicability

Unknown features are fingerprint features in the query molecule, but not found in the training set.

1. All properties and OPS components are within expected ranges.
2. Unknown ECFP\_2 feature: -40769921: [\*]C([\*])[C@](C)(O)C=[\*]
3. Unknown ECFP\_2 feature: 464446479: [\*]C(=CC([\*])([\*])[\*])[\*]
4. Unknown ECFP\_2 feature: 1796421070: [\*]OC(=C([\*])[\*])C(=[\*])[\*]
5. Unknown ECFP\_2 feature: 1792159373: [\*]C(=C(C)C(=[\*])[\*])[\*]

## Feature Contribution

### Top features for positive contribution

| Fingerprint | Bit/Smiles | Feature Structure                                                                                                         | Score | Carcinogen in training set |
|-------------|------------|---------------------------------------------------------------------------------------------------------------------------|-------|----------------------------|
| ECFP_6      | -3067141   | 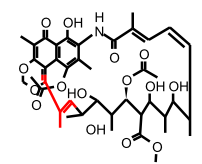<br><chem>[*]C=C(C)C(=[*])[*]</chem> | 0.675 | 4 out of 5                 |

| ECFP_6                                 | -812320335 | 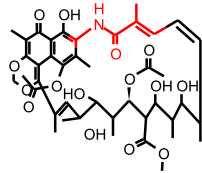<br><chem>[*]C=C(C)C(=O)N[c]([*])[*]</chem> | 0.581  | 3 out of 4                 |
|----------------------------------------|------------|--------------------------------------------------------------------------------------------------------------------------------|--------|----------------------------|
| ECFP_6                                 | 456978524  | <br><chem>[*]C([*])OC(=[*])[*]</chem>       | 0.529  | 7 out of 12                |
| Top Features for negative contribution |            |                                                                                                                                |        |                            |
| Fingerprint                            | Bit/Smiles | Feature Structure                                                                                                              | Score  | Carcinogen in training set |
| ECFP_6                                 | 1717462980 | <br><chem>[*]C(=[*])C(=O)[c]([*])[*]</chem> | -1.246 | 0 out of 8                 |
| ECFP_6                                 | 305695353  | <br><chem>[*]C([*])C(O)C([*])[*]</chem>    | -0.638 | 1 out of 9                 |
| ECFP_6                                 | -89681466  | <br><chem>[*]OCO[*]</chem>                | -0.482 | 0 out of 2                 |



# Simeprevir

# TOPKAT\_Mouse\_Female\_FDA\_None\_vs\_Carcinogen

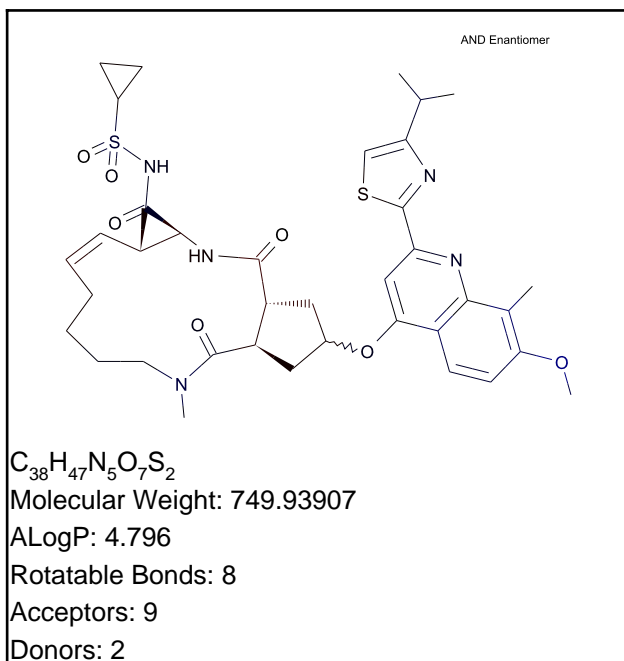

## Model Prediction

Prediction: Non-Carcinogen

Probability: 0.207

Enrichment: 0.646

Bayesian Score: -4.971

Mahalanobis Distance: 15.384

Mahalanobis Distance p-value: 4.64e-008

Prediction: Positive if the Bayesian score is above the estimated best cutoff value from minimizing the false positive and false negative rate.

Probability: The estimated probability that the sample is in the positive category. This assumes that the Bayesian score follows a normal distribution and is different from the prediction using a cutoff.

Enrichment: An estimate of enrichment, that is, the increased likelihood (versus random) of this sample being in the category. Bayesian Score: The standard Laplacian-modified Bayesian score.

Mahalanobis Distance: The Mahalanobis distance (MD) is the distance to the center of the training data. The larger the MD, the less trustworthy the prediction.

Mahalanobis Distance p-value: The p-value gives the fraction of training data with an MD greater than or equal to the one for the given sample, assuming normally distributed data. The smaller the p-value, the less trustworthy the prediction. For highly non-normal X properties (e.g., fingerprints), the MD p-value is wildly inaccurate.

## Structural Similar Compounds

| Name               | Reserpine                                                                           | Bromocriptine                                                                       | Itraconazole                                                                        |
|--------------------|-------------------------------------------------------------------------------------|-------------------------------------------------------------------------------------|-------------------------------------------------------------------------------------|
| Structure          | 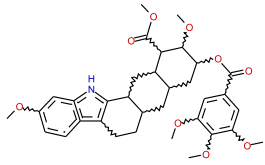 |  |  |
| Actual Endpoint    | Carcinogen                                                                          | Non-Carcinogen                                                                      | Non-Carcinogen                                                                      |
| Predicted Endpoint | Carcinogen                                                                          | Non-Carcinogen                                                                      | Non-Carcinogen                                                                      |
| Distance           | 0.783                                                                               | 0.847                                                                               | 0.870                                                                               |
| Reference          | US FDA (Centre for Drug Eval.& Res./Off. Testing & Res.) Sept. 1997                 | US FDA (Centre for Drug Eval.& Res./Off. Testing & Res.) Sept. 1997                 | US FDA (Centre for Drug Eval.& Res./Off. Testing & Res.) Sept. 1997                 |

## Model Applicability

Unknown features are fingerprint features in the query molecule, but not found in the training set.

- OPS PC4 out of range. Value: 5.1697. Training min, max, SD, explained variance: -4.7116, 4.7287, 2.103, 0.0450.
- OPS PC14 out of range. Value: -3.7168. Training min, max, SD, explained variance: -3.5274, 4.3994, 1.457, 0.0216.
- OPS PC17 out of range. Value: 3.3515. Training min, max, SD, explained variance: -4.7306, 3.3103, 1.364, 0.0189.
- Unknown ECFP\_2 feature: -309676563: [\*]N[C@]1(C[C@H]1[\*])C(=[\*])[\*]
- Unknown ECFP\_2 feature: -1049290660: [\*]C1([\*])C[C@H]1C=[\*]
- Unknown ECFP\_2 feature: 360408239: [\*]C\C=C/[\*]
- Unknown ECFP\_2 feature: 1616402542: [\*]CN(C)C(=[\*])[\*]
- Unknown ECFP\_2 feature: -1818486371: [\*]NC(=O)C1([\*])[\*][\*]1
- Unknown ECFP\_2 feature: 1310940530: [\*]C([\*])O[c](:[\*]):[\*]
- Unknown ECFP\_2 feature: -253227249: [\*]:[c](:[\*])[c]1:n[\*]:[\*]:s:1
- Unknown ECFP\_2 feature: 733491677: [\*]:[c](:[\*])C(C)C
- Unknown ECFP\_2 feature: 2121941848: [\*]NS(=O)(=O)C1[\*][\*]1
- Unknown ECFP\_2 feature: -622223421: [\*]S(=[\*])(=[\*])C1CC1

## Feature Contribution

Top features for positive contribution

| Fingerprint                            | Bit/Smiles  | Feature Structure                                                                                                                                      | Score  | Carcinogen in training set |
|----------------------------------------|-------------|--------------------------------------------------------------------------------------------------------------------------------------------------------|--------|----------------------------|
| ECFP_6                                 | -2095963820 | 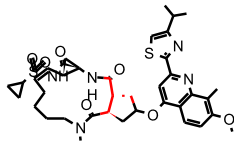<br><chem>[*][C@@H]1[*][*]C[C@H]1C(=*)[*]</chem>                    | 0.891  | 12 out of 14               |
| ECFP_6                                 | 2082767335  | <br><chem>[*][c](:[*]):[c]1:[cH]:[cH]:[c]([*]):[*]:[c]:1:[*]</chem> | 0.617  | 2 out of 2                 |
| ECFP_6                                 | -1331088410 | <br><chem>[*]CCC=[*]</chem>                                         | 0.442  | 2 out of 3                 |
| Top Features for negative contribution |             |                                                                                                                                                        |        |                            |
| Fingerprint                            | Bit/Smiles  | Feature Structure                                                                                                                                      | Score  | Carcinogen in training set |
| ECFP_6                                 | 2077607946  | <br><chem>[*]O[c]1:[cH]:[cH]:[c](:[*]):[*]:[c]:1[*]</chem>        | -1.152 | 0 out of 7                 |
|                                        |             |                                                                                                                                                        |        |                            |

|        |            |                                                                                                                                  |        |             |
|--------|------------|----------------------------------------------------------------------------------------------------------------------------------|--------|-------------|
| ECFP_6 | 1526862590 | 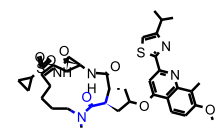<br><chem>[*]C([*])C(=O)N([*])[<br/>1]</chem> | -0.638 | 1 out of 9  |
| ECFP_6 | 1307307440 | <br><chem>[*]:[c](:[*])OC</chem>              | -0.558 | 4 out of 25 |

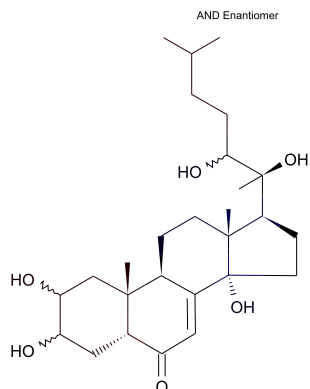
 $C_{27}H_{44}O_6$ 

Molecular Weight: 464.63466

ALogP: 2.489

Rotatable Bonds: 5

Acceptors: 6

Donors: 5

## Model Prediction

**Prediction: Multiple-Carcinogen**

Probability: 0.467

Enrichment: 1.139

Bayesian Score: 1.502

Mahalanobis Distance: 18.032

Mahalanobis Distance p-value: 2.27e-009

Prediction: Positive if the Bayesian score is above the estimated best cutoff value from minimizing the false positive and false negative rate.

Probability: The estimated probability that the sample is in the positive category. This assumes that the Bayesian score follows a normal distribution and is different from the prediction using a cutoff.

Enrichment: An estimate of enrichment, that is, the increased likelihood (versus random) of this sample being in the category.

Bayesian Score: The standard Laplacian-modified Bayesian score.

Mahalanobis Distance: The Mahalanobis distance (MD) is the distance to the center of the training data. The larger the MD, the less trustworthy the prediction.

Mahalanobis Distance p-value: The p-value gives the fraction of training data with an MD greater than or equal to the one for the given sample, assuming normally distributed data. The smaller the p-value, the less trustworthy the prediction. For highly non-normal X properties (e.g., fingerprints), the MD p-value is wildly inaccurate.

## Structural Similar Compounds

| Name               | Triamcinolone                                                       | Labetalol                                                           | Glimepiride                                                         |
|--------------------|---------------------------------------------------------------------|---------------------------------------------------------------------|---------------------------------------------------------------------|
| Structure          |                                                                     |                                                                     |                                                                     |
| Actual Endpoint    | Single-Carcinogen                                                   | Single-Carcinogen                                                   | Single-Carcinogen                                                   |
| Predicted Endpoint | Single-Carcinogen                                                   | Single-Carcinogen                                                   | Single-Carcinogen                                                   |
| Distance           | 0.747                                                               | 0.836                                                               | 0.863                                                               |
| Reference          | US FDA (Centre for Drug Eval.& Res./Off. Testing & Res.) Sept. 1997 | US FDA (Centre for Drug Eval.& Res./Off. Testing & Res.) Sept. 1997 | US FDA (Centre for Drug Eval.& Res./Off. Testing & Res.) Sept. 1997 |

## Model Applicability

Unknown features are fingerprint features in the query molecule, but not found in the training set.

1. All properties and OPS components are within expected ranges.
2. Unknown ECFP\_2 feature: 2025123907: [\*]C([\*])([\*])O
3. Unknown ECFP\_2 feature: -483166673: [\*]C(=[\*])[C@]1(O)C[\*][\*]C1([\*])[\*]
4. Unknown ECFP\_2 feature: -1049278438: [\*]C([\*])([\*])[C@H]1C[\*][\*]C1([\*])[\*]
5. Unknown ECFP\_2 feature: 333674688: [\*]C[C@@H](C(=[\*])([\*])C([\*])([\*])[\*])
6. Unknown ECFP\_2 feature: 1195714366: [\*]C([\*])C(C)(O)C([\*])[\*]
7. Unknown ECFP\_2 feature: -211745668: [\*]C([\*])C(=O)C=[\*]
8. Unknown ECFP\_2 feature: 80071435: [\*]CC(O)C([\*])([\*])[\*]

## Feature Contribution

### Top features for positive contribution

| Fingerprint | Bit/Smiles | Feature Structure | Score | Multiple-Carcinogen in training set |
|-------------|------------|-------------------|-------|-------------------------------------|
|-------------|------------|-------------------|-------|-------------------------------------|

|                                        |            |                                                                                                                                            |        |                                     |
|----------------------------------------|------------|--------------------------------------------------------------------------------------------------------------------------------------------|--------|-------------------------------------|
| ECFP_4                                 | -84975114  | 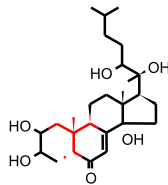 <chem>[*]CC(C)(C([*])[*])C([*])[*]</chem>               | 0.707  | 6 out of 6                          |
| ECFP_4                                 | 2024749573 |  <chem>[*]C([*])O</chem>                                | 0.494  | 8 out of 11                         |
| ECFP_4                                 | -801490360 |  <chem>[*]C([*])CC([*])[*]</chem>                       | 0.422  | 8 out of 12                         |
| Top Features for negative contribution |            |                                                                                                                                            |        |                                     |
| Fingerprint                            | Bit/Smiles | Feature Structure                                                                                                                          | Score  | Multiple-Carcinogen in training set |
| ECFP_4                                 | -565844211 |  <chem>[*]C@@H1[*]C@2([*])[*]C@H1(*)C@@2(C)CC1</chem> | -0.968 | 0 out of 4                          |
| ECFP_4                                 | 2018700401 |  <chem>[*]C([*])([*])O</chem>                         | -0.657 | 1 out of 7                          |

ECFP\_4

1908990050

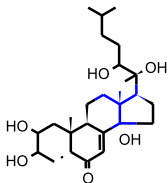

[\*]C[C@]1(C)[C@@H]([\*]  
)[\*][\*]C1([\*])[\*]

-0.545

1 out of 6

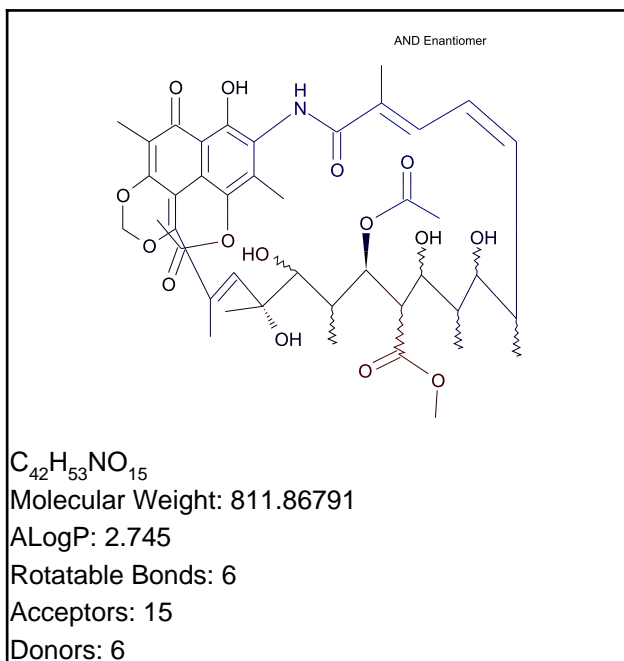

## Model Prediction

Prediction: Single-Carcinogen

Probability: 0.240

Enrichment: 0.585

Bayesian Score: -6.577

Mahalanobis Distance: 11.645

Mahalanobis Distance p-value: 0.000802

Prediction: Positive if the Bayesian score is above the estimated best cutoff value from minimizing the false positive and false negative rate.

Probability: The estimated probability that the sample is in the positive category. This assumes that the Bayesian score follows a normal distribution and is different from the prediction using a cutoff.

Enrichment: An estimate of enrichment, that is, the increased likelihood (versus random) of this sample being in the category. Bayesian Score: The standard Laplacian-modified Bayesian score.

Mahalanobis Distance: The Mahalanobis distance (MD) is the distance to the center of the training data. The larger the MD, the less trustworthy the prediction.

Mahalanobis Distance p-value: The p-value gives the fraction of training data with an MD greater than or equal to the one for the given sample, assuming normally distributed data. The smaller the p-value, the less trustworthy the prediction. For highly non-normal X properties (e.g., fingerprints), the MD p-value is wildly inaccurate.

## Structural Similar Compounds

| Name               | Rifampin                                                                            | Sulfasalazine                                                                       | Reserpine                                                                           |
|--------------------|-------------------------------------------------------------------------------------|-------------------------------------------------------------------------------------|-------------------------------------------------------------------------------------|
| Structure          | 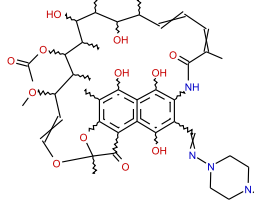 |  |  |
| Actual Endpoint    | Single-Carcinogen                                                                   | Single-Carcinogen                                                                   | Multiple-Carcinogen                                                                 |
| Predicted Endpoint | Single-Carcinogen                                                                   | Single-Carcinogen                                                                   | Multiple-Carcinogen                                                                 |
| Distance           | 0.412                                                                               | 1.574                                                                               | 1.596                                                                               |
| Reference          | US FDA (Centre for Drug Eval.& Res./Off. Testing & Res.) Sept. 1997                 | US FDA (Centre for Drug Eval.& Res./Off. Testing & Res.) Sept. 1997                 | US FDA (Centre for Drug Eval.& Res./Off. Testing & Res.) Sept. 1997                 |

## Model Applicability

Unknown features are fingerprint features in the query molecule, but not found in the training set.

- OPS PC7 out of range. Value: -4.1734. Training min, max, SD, explained variance: -4.1501, 4.2431, 1.518, 0.0422.
- OPS PC15 out of range. Value: -2.4651. Training min, max, SD, explained variance: -2.3157, 2.7205, 1.023, 0.0192.
- Unknown ECFP\_2 feature: -40769921: [\*]C([\*])(C@)(C)(O)C=[\*]
- Unknown ECFP\_2 feature: 464446479: [\*]C(=CC([\*])([\*])([\*]))[\*]
- Unknown ECFP\_2 feature: 1796421070: [\*]OC(=C([\*])([\*])C(=[\*])([\*]))
- Unknown ECFP\_2 feature: 1790105651: [\*]C(=C(C(=[\*])([\*])c([\*])([\*])([\*]))
- Unknown ECFP\_2 feature: 1792159373: [\*]C(=C(C)C(=[\*])([\*]))
- Unknown ECFP\_2 feature: -89681466: [\*]OCO[\*]
- Unknown ECFP\_2 feature: 1717462980: [\*]C(=[\*])C(=O)[c]([\*])([\*]):[\*]

## Feature Contribution

| Top features for positive contribution |            |                   |       |                                     |
|----------------------------------------|------------|-------------------|-------|-------------------------------------|
| Fingerprint                            | Bit/Smiles | Feature Structure | Score | Multiple-Carcinogen in training set |
|                                        |            |                   |       |                                     |

|                                        |             |                                                                                                                                 |        |                                     |
|----------------------------------------|-------------|---------------------------------------------------------------------------------------------------------------------------------|--------|-------------------------------------|
| ECFP_4                                 | -521596699  | 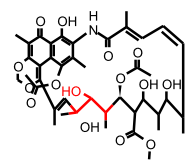<br><chem>[*]C([*])C(O)C([*])([*])[*]</chem> | 0.586  | 3 out of 3                          |
| ECFP_4                                 | -1683911134 | <br><chem>[*]OC(=O)C([*])([*])</chem>        | 0.501  | 2 out of 2                          |
| ECFP_4                                 | 2024749573  | <br><chem>[*]C([*])O</chem>                  | 0.494  | 8 out of 11                         |
| Top Features for negative contribution |             |                                                                                                                                 |        |                                     |
| Fingerprint                            | Bit/Smiles  | Feature Structure                                                                                                               | Score  | Multiple-Carcinogen in training set |
| ECFP_4                                 | 866218936   | <br><chem>[*]C(=[*])C</chem>               | -1.239 | 0 out of 6                          |
| ECFP_4                                 | -3067141    | <br><chem>[*]C=C(/C)C(=[*])([*])</chem>    | -0.968 | 0 out of 4                          |



ECFP\_4

-812320335

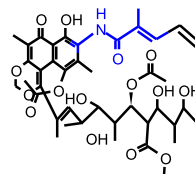

-0.800

0 out of 3

[\*]C=C(/C)C(=O)N[c]  
([\*])[\*]

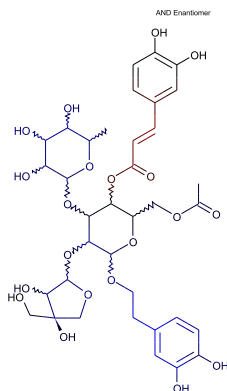

$C_{36}H_{46}O_{20}$

Molecular Weight: 798.73843

ALogP: -0.546

Rotatable Bonds: 16

Acceptors: 20

Donors: 10

## Model Prediction

Prediction: Non-Carcinogen

Probability: 0.129

Enrichment: 0.440

Bayesian Score: -11.300

Mahalanobis Distance: 15.541

Mahalanobis Distance p-value: 7.88e-009

Prediction: Positive if the Bayesian score is above the estimated best cutoff value from minimizing the false positive and false negative rate.

Probability: The estimated probability that the sample is in the positive category. This assumes that the Bayesian score follows a normal distribution and is different from the prediction using a cutoff.

Enrichment: An estimate of enrichment, that is, the increased likelihood (versus random) of this sample being in the category.

Bayesian Score: The standard Laplacian-modified Bayesian score.

Mahalanobis Distance: The Mahalanobis distance (MD) is the distance to the center of the training data. The larger the MD, the less trustworthy the prediction.

Mahalanobis Distance p-value: The p-value gives the fraction of training data with an MD greater than or equal to the one for the given sample, assuming normally distributed data. The smaller the p-value, the less trustworthy the prediction. For highly non-normal X properties (e.g., fingerprints), the MD p-value is wildly inaccurate.

## Structural Similar Compounds

| Name               | Rifampin                                                            | Netilmicin                                                          | Rifabutin                                                           |
|--------------------|---------------------------------------------------------------------|---------------------------------------------------------------------|---------------------------------------------------------------------|
| Structure          |                                                                     |                                                                     |                                                                     |
| Actual Endpoint    | Non-Carcinogen                                                      | Non-Carcinogen                                                      | Non-Carcinogen                                                      |
| Predicted Endpoint | Non-Carcinogen                                                      | Non-Carcinogen                                                      | Non-Carcinogen                                                      |
| Distance           | 1.501                                                               | 1.509                                                               | 1.647                                                               |
| Reference          | US FDA (Centre for Drug Eval.& Res./Off. Testing & Res.) Sept. 1997 | US FDA (Centre for Drug Eval.& Res./Off. Testing & Res.) Sept. 1997 | US FDA (Centre for Drug Eval.& Res./Off. Testing & Res.) Sept. 1997 |

## Model Applicability

Unknown features are fingerprint features in the query molecule, but not found in the training set.

1. Num\_H\_Donors out of range. Value: 10. Training min, max, mean, SD: 0, 8, 1.7342, 1.449.
2. Num\_H\_Acceptors out of range. Value: 20. Training min, max, mean, SD: 0, 15, 4.2627, 2.435.
3. OPS PC6 out of range. Value: 5.7174. Training min, max, SD, explained variance: -5.6153, 5.6497, 1.991, 0.0416.

## Feature Contribution

### Top features for positive contribution

| Fingerprint | Bit/Smiles | Feature Structure                                                                 | Score | Carcinogen in training set |
|-------------|------------|-----------------------------------------------------------------------------------|-------|----------------------------|
| FCFP_6      | -146015125 | <p>AND Enantiomer</p> <p><chem>[*]C(=[*])C=C\c([c]([cH]);[*]);[cH];[*]</chem></p> | 0.676 | 2 out of 2                 |

|                                        |             |                                                                                                                                                                    |        |                            |
|----------------------------------------|-------------|--------------------------------------------------------------------------------------------------------------------------------------------------------------------|--------|----------------------------|
| FCFP_6                                 | 451847724   | <p>AND Enantiomer</p> 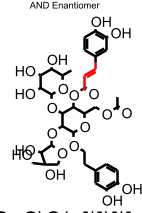 <p>[*]C=C\C(=[*])[*]</p>                                 | 0.479  | 21 out of 48               |
| FCFP_6                                 | -2132692875 | <p>AND Enantiomer</p>  <p>[*]OC(=O)\C=C\c([*]<br/>[*]):[*]</p>                  | 0.460  | 1 out of 1                 |
| Top Features for negative contribution |             |                                                                                                                                                                    |        |                            |
| Fingerprint                            | Bit/Smiles  | Feature Structure                                                                                                                                                  | Score  | Carcinogen in training set |
| FCFP_6                                 | -497728148  | <p>AND Enantiomer</p>  <p>[*]CC[c]1:[cH]:[cH]:[cH]:[<br/>*]:[c]([*]):[cH]:1</p> | -0.960 | 2 out of 26                |
| FCFP_6                                 | 699500266   | <p>AND Enantiomer</p>  <p>[*]OC(O[*])C([*])[*]</p>                             | -0.850 | 1 out of 14                |
| FCFP_6                                 | -2005207466 | <p>AND Enantiomer</p>  <p>[*]OCC[c](:[cH]:[*])<br/>[cH]:[*]</p>               | -0.582 | 0 out of 3                 |

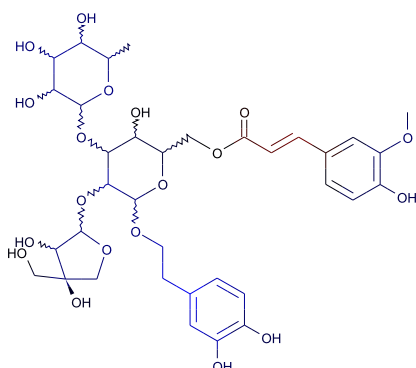
$$\text{C}_{35}\text{H}_{46}\text{O}_{19}$$

Molecular Weight: 770.72833

ALogP: -0.699

Rotatable Bonds: 15

Acceptors: 19

Donors: 10

## Model Prediction

**Prediction: Non-Carcinogen**

Probability: 0.105

Enrichment: 0.358

Bayesian Score: -13.549

Mahalanobis Distance: 16.254

Mahalanobis Distance p-value: 2.64e-010

Prediction: Positive if the Bayesian score is above the estimated best cutoff value from minimizing the false positive and false negative rate.

**Probability:** The estimated probability that the sample is in the positive category. This assumes that the Bayesian score follows a normal distribution and is different from the prediction using a cutoff.

Enrichment: An estimate of enrichment, that is, the increased likelihood (versus random) of this sample being in the category.  
Bayesian Score: The standard Laplacian-modified Bayesian score.

**Mahalanobis Distance:** The Mahalanobis distance (MD) is the distance to the center of the training data. The larger the MD, the less trustworthy the prediction.

Mahalanobis Distance p-value: The p-value gives the fraction of training data with an MD greater than or equal to the one for the given sample, assuming normally distributed data. The smaller the p-value, the less trustworthy the prediction. For highly non-normal X properties (e.g., fingerprints), the MD p-value is wildly inaccurate.

## Structural Similar Compounds

| Name               | Netilmicin                                                                          | Rifampin                                                                            | Rifabutin                                                                           |
|--------------------|-------------------------------------------------------------------------------------|-------------------------------------------------------------------------------------|-------------------------------------------------------------------------------------|
| Structure          | 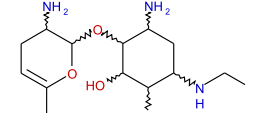 |  |  |
| Actual Endpoint    | Non-Carcinogen                                                                      | Non-Carcinogen                                                                      | Non-Carcinogen                                                                      |
| Predicted Endpoint | Non-Carcinogen                                                                      | Non-Carcinogen                                                                      | Non-Carcinogen                                                                      |
| Distance           | 1.402                                                                               | 1.437                                                                               | 1.586                                                                               |
| Reference          | US FDA (Centre for Drug Eval.& Res./Off. Testing & Res.) Sept. 1997                 | US FDA (Centre for Drug Eval.& Res./Off. Testing & Res.) Sept. 1997                 | US FDA (Centre for Drug Eval.& Res./Off. Testing & Res.) Sept. 1997                 |

## Model Applicability

Unknown features are fingerprint features in the query molecule, but not found in the training set.

1. Num\_H\_Donors out of range. Value: 10. Training min, max, mean, SD: 0, 8, 1.7342, 1.449.
2. Num\_H\_Acceptors out of range. Value: 19. Training min, max, mean, SD: 0, 15, 4.2627, 2.435.
3. OPS\_PC3 out of range. Value: 6.2187. Training min, max, SD, explained variance: -6.8858, 5.9444, 2.309, 0.0559.

## Feature Contribution

## Top features for positive contribution

| Fingerprint | Bit/Smiles | Feature Structure                                                                                                                                | Score | Carcinogen in training set |
|-------------|------------|--------------------------------------------------------------------------------------------------------------------------------------------------|-------|----------------------------|
| FCFP_6      | -146015125 | 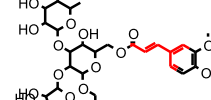<br><chem>[*]C(=[*])C=C[c]([*]:[*]c1ccccc1O):[*]:[*]</chem> | 0.676 | 2 out of 2                 |

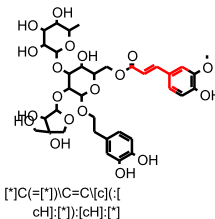

| FCFP_6                                 | 451847724   | 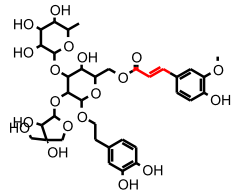<br><chem>[*]C=C(C(=[*]))[*]</chem>              | 0.479  | 21 out of 48               |
|----------------------------------------|-------------|-------------------------------------------------------------------------------------------------------------------------------------|--------|----------------------------|
| FCFP_6                                 | -1251367201 | <br><chem>[*]C=C(C(=O)OC([*]))[*]</chem>         | 0.460  | 1 out of 1                 |
| Top Features for negative contribution |             |                                                                                                                                     |        |                            |
| Fingerprint                            | Bit/Smiles  | Feature Structure                                                                                                                   | Score  | Carcinogen in training set |
| FCFP_6                                 | -497728148  | <br><chem>[*]CC[c]1:[cH]:[cH]:[cH]:[cH]:1</chem> | -0.960 | 2 out of 26                |
| FCFP_6                                 | 699500266   | <br><chem>[*]OC(O[*])C([*])[*]</chem>           | -0.850 | 1 out of 14                |
| FCFP_6                                 | 745786291   | <br><chem>[*]OC1OCc([*])([*])C1</chem>         | -0.582 | 0 out of 3                 |

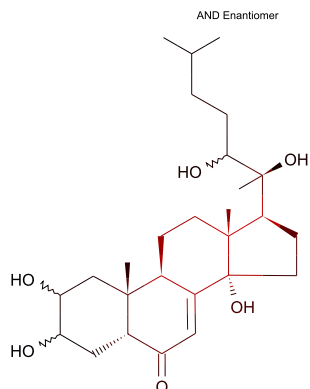
 $C_{27}H_{44}O_6$ 

Molecular Weight: 464.63466

ALogP: 2.489

Rotatable Bonds: 5

Acceptors: 6

Donors: 5

## Model Prediction

**Prediction: Carcinogen**

Probability: 0.457

Enrichment: 1.551

Bayesian Score: 4.542

Mahalanobis Distance: 10.822

Mahalanobis Distance p-value: 0.107

Prediction: Positive if the Bayesian score is above the estimated best cutoff value from minimizing the false positive and false negative rate.

Probability: The estimated probability that the sample is in the positive category. This assumes that the Bayesian score follows a normal distribution and is different from the prediction using a cutoff.

Enrichment: An estimate of enrichment, that is, the increased likelihood (versus random) of this sample being in the category.

Bayesian Score: The standard Laplacian-modified Bayesian score.

Mahalanobis Distance: The Mahalanobis distance (MD) is the distance to the center of the training data. The larger the MD, the less trustworthy the prediction.

Mahalanobis Distance p-value: The p-value gives the fraction of training data with an MD greater than or equal to the one for the given sample, assuming normally distributed data. The smaller the p-value, the less trustworthy the prediction. For highly non-normal X properties (e.g., fingerprints), the MD p-value is wildly inaccurate.

## Structural Similar Compounds

| Name               | Triamcinolone                                                       | Budesonide                                                          | Glimepiride                                                         |
|--------------------|---------------------------------------------------------------------|---------------------------------------------------------------------|---------------------------------------------------------------------|
| Structure          |                                                                     |                                                                     |                                                                     |
| Actual Endpoint    | Carcinogen                                                          | Non-Carcinogen                                                      | Carcinogen                                                          |
| Predicted Endpoint | Carcinogen                                                          | Non-Carcinogen                                                      | Carcinogen                                                          |
| Distance           | 0.721                                                               | 0.761                                                               | 0.793                                                               |
| Reference          | US FDA (Centre for Drug Eval.& Res./Off. Testing & Res.) Sept. 1997 | US FDA (Centre for Drug Eval.& Res./Off. Testing & Res.) Sept. 1997 | US FDA (Centre for Drug Eval.& Res./Off. Testing & Res.) Sept. 1997 |

## Model Applicability

Unknown features are fingerprint features in the query molecule, but not found in the training set.

1. All properties and OPS components are within expected ranges.

## Feature Contribution

### Top features for positive contribution

| Fingerprint | Bit/Smiles  | Feature Structure                                               | Score | Carcinogen in training set |
|-------------|-------------|-----------------------------------------------------------------|-------|----------------------------|
| FCFP_6      | -1742546106 | <br><chem>*[C@@H]1[C@@]2(*)[C@H]3[C@H]([C@@H]1*)C(=O)CC1</chem> | 0.748 | 10 out of 16               |

|                                        |             |                                                                                                                                                        |        |                            |
|----------------------------------------|-------------|--------------------------------------------------------------------------------------------------------------------------------------------------------|--------|----------------------------|
| FCFP_6                                 | -415245925  | 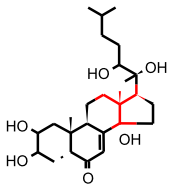<br><chem>[*]C[C@]1(C)[C@@H]([*])[*]C1([*])[*]</chem>                | 0.710  | 16 out of 28               |
| FCFP_6                                 | -145742489  | <br><chem>[*]C([*])([*])[C@H]1C[C@@@]2(O)C(=[*])[*]CC[C@]12C</chem> | 0.668  | 3 out of 4                 |
| Top Features for negative contribution |             |                                                                                                                                                        |        |                            |
| Fingerprint                            | Bit/Smiles  | Feature Structure                                                                                                                                      | Score  | Carcinogen in training set |
| FCFP_6                                 | 420514984   | <br><chem>[*]C1([*])[*]CC(O)C(O)C1</chem>                           | -0.233 | 0 out of 1                 |
| FCFP_6                                 | -415156552  | <br><chem>[*]C[C@@]1(O)C1[*]C1[*]</chem>                           | -0.217 | 7 out of 34                |
| FCFP_6                                 | -1043250487 | <br><chem>[*]C1[*]C([*])([*])C1O</chem>                           | -0.073 | 19 out of 78               |

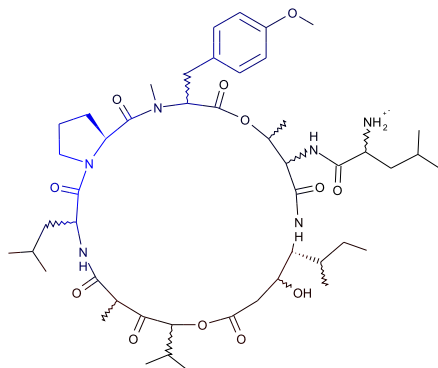

$C_{49}H_{79}N_6O_{12}$

Molecular Weight: 944.18455

ALogP: 3.176

Rotatable Bonds: 13

Acceptors: 12

Donors: 5

## Model Prediction

Prediction: Non-Carcinogen

Probability: 0.121

Enrichment: 0.411

Bayesian Score: -12.039

Mahalanobis Distance: 15.647

Mahalanobis Distance p-value: 4.82e-009

Prediction: Positive if the Bayesian score is above the estimated best cutoff value from minimizing the false positive and false negative rate.

Probability: The estimated probability that the sample is in the positive category. This assumes that the Bayesian score follows a normal distribution and is different from the prediction using a cutoff.

Enrichment: An estimate of enrichment, that is, the increased likelihood (versus random) of this sample being in the category.

Bayesian Score: The standard Laplacian-modified Bayesian score.

Mahalanobis Distance: The Mahalanobis distance (MD) is the distance to the center of the training data. The larger the MD, the less trustworthy the prediction.

Mahalanobis Distance p-value: The p-value gives the fraction of training data with an MD greater than or equal to the one for the given sample, assuming normally distributed data. The smaller the p-value, the less trustworthy the prediction. For highly non-normal X properties (e.g., fingerprints), the MD p-value is wildly inaccurate.

## Structural Similar Compounds

| Name               | Erythromycin                                                        | Rifabutin                                                           | Rifampin                                                            |
|--------------------|---------------------------------------------------------------------|---------------------------------------------------------------------|---------------------------------------------------------------------|
| Structure          |                                                                     |                                                                     |                                                                     |
| Actual Endpoint    | Non-Carcinogen                                                      | Non-Carcinogen                                                      | Non-Carcinogen                                                      |
| Predicted Endpoint | Non-Carcinogen                                                      | Non-Carcinogen                                                      | Non-Carcinogen                                                      |
| Distance           | 0.996                                                               | 0.996                                                               | 1.057                                                               |
| Reference          | US FDA (Centre for Drug Eval.& Res./Off. Testing & Res.) Sept. 1997 | US FDA (Centre for Drug Eval.& Res./Off. Testing & Res.) Sept. 1997 | US FDA (Centre for Drug Eval.& Res./Off. Testing & Res.) Sept. 1997 |

## Model Applicability

Unknown features are fingerprint features in the query molecule, but not found in the training set.

1. Molecular\_Weight out of range. Value: 944.18. Training min, max, mean, SD: 46.068, 847, 304.63, 118.9.
2. Unknown FCFP\_2 feature: 10: [\*][NH2+][\*]
3. Unknown FCFP\_2 feature: 18028531: [\*]C([\*])[NH2+]C
4. Unknown FCFP\_2 feature: -1817836174: [\*]CC([NH2+][\*])C(=[\*])[\*]
5. Unknown FCFP\_2 feature: 136418580: [\*][NH2+]C

## Feature Contribution

### Top features for positive contribution

| Fingerprint | Bit/Smiles | Feature Structure | Score | Carcinogen in training set |
|-------------|------------|-------------------|-------|----------------------------|
| FCFP_6      | 261084607  |                   | 0.676 | 2 out of 2                 |



| FCFP_6                                 | 61186801    | 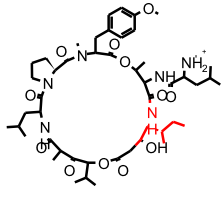<br><chem>[*]N[C@@H](C([*])([*])C(C)CC</chem>                       | 0.460  | 1 out of 1                 |
|----------------------------------------|-------------|--------------------------------------------------------------------------------------------------------------------------------------------------------|--------|----------------------------|
| FCFP_6                                 | 566058135   | <br><chem>[*]NC(=O)C([*])([*])</chem>                               | 0.447  | 17 out of 40               |
| Top Features for negative contribution |             |                                                                                                                                                        |        |                            |
| Fingerprint                            | Bit/Smiles  | Feature Structure                                                                                                                                      | Score  | Carcinogen in training set |
| FCFP_6                                 | 393220684   | <br><chem>[*]CC(N([*])C(=O)N1C[*])C([*])C@H1[*])</chem>             | -1.133 | 0 out of 8                 |
| FCFP_6                                 | -497728148  | <br><chem>[*]CC[c]1:[cH]:[cH]:[cH]:[cH]:[*]:[c]([*]):[cH]:1</chem> | -0.960 | 2 out of 26                |
| FCFP_6                                 | -1423737326 | <br><chem>[*]C([*])CC(NC(=[*])([*])C(=O)N([*])([*])</chem>        | -0.947 | 0 out of 6                 |

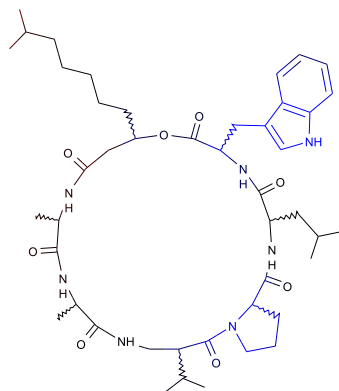

$C_{45}H_{69}N_7O_8$

Molecular Weight: 836.07145

ALogP: 4.986

Rotatable Bonds: 11

Acceptors: 8

Donors: 6

## Model Prediction

Prediction: Non-Carcinogen

Probability: 0.098

Enrichment: 0.331

Bayesian Score: -14.368

Mahalanobis Distance: 15.128

Mahalanobis Distance p-value: 5.24e-008

Prediction: Positive if the Bayesian score is above the estimated best cutoff value from minimizing the false positive and false negative rate.

Probability: The estimated probability that the sample is in the positive category. This assumes that the Bayesian score follows a normal distribution and is different from the prediction using a cutoff.

Enrichment: An estimate of enrichment, that is, the increased likelihood (versus random) of this sample being in the category.

Bayesian Score: The standard Laplacian-modified Bayesian score.

Mahalanobis Distance: The Mahalanobis distance (MD) is the distance to the center of the training data. The larger the MD, the less trustworthy the prediction.

Mahalanobis Distance p-value: The p-value gives the fraction of training data with an MD greater than or equal to the one for the given sample, assuming normally distributed data. The smaller the p-value, the less trustworthy the prediction. For highly non-normal X properties (e.g., fingerprints), the MD p-value is wildly inaccurate.

## Structural Similar Compounds

| Name               | Bromocriptine                                                       | Erythromycin                                                        | Rifabutin                                                           |
|--------------------|---------------------------------------------------------------------|---------------------------------------------------------------------|---------------------------------------------------------------------|
| Structure          |                                                                     |                                                                     |                                                                     |
| Actual Endpoint    | Non-Carcinogen                                                      | Non-Carcinogen                                                      | Non-Carcinogen                                                      |
| Predicted Endpoint | Non-Carcinogen                                                      | Non-Carcinogen                                                      | Non-Carcinogen                                                      |
| Distance           | 1.067                                                               | 1.082                                                               | 1.106                                                               |
| Reference          | US FDA (Centre for Drug Eval.& Res./Off. Testing & Res.) Sept. 1997 | US FDA (Centre for Drug Eval.& Res./Off. Testing & Res.) Sept. 1997 | US FDA (Centre for Drug Eval.& Res./Off. Testing & Res.) Sept. 1997 |

## Model Applicability

Unknown features are fingerprint features in the query molecule, but not found in the training set.

1. All properties and OPS components are within expected ranges.

## Feature Contribution

### Top features for positive contribution

| Fingerprint | Bit/Smiles | Feature Structure                                                 | Score | Carcinogen in training set |
|-------------|------------|-------------------------------------------------------------------|-------|----------------------------|
| FCFP_6      | -55265897  | <br><chem>[*]C([*])([*])([*])[C@H](C)CC([*])([*])[*]C1=[*]</chem> | 0.594 | 17 out of 34               |

| FCFP_6                                 | -1367722585 | 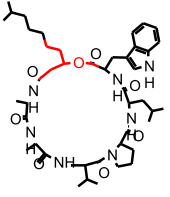<br><chem>[*]CCC(CC(=[*]))[*])OC(=[*])[*]</chem>                    | 0.547  | 3 out of 5                 |
|----------------------------------------|-------------|--------------------------------------------------------------------------------------------------------------------------------------------------------|--------|----------------------------|
| FCFP_6                                 | -387072142  | <br><chem>[*][c]1:[*]:[*]1:2:[*]:[cH]:[cH]:[cH]:[cH]:[c]:1:2</chem> | 0.477  | 4 out of 8                 |
| Top Features for negative contribution |             |                                                                                                                                                        |        |                            |
| Fingerprint                            | Bit/Smiles  | Feature Structure                                                                                                                                      | Score  | Carcinogen in training set |
| FCFP_6                                 | -1525101452 | <br><chem>[*]C([*])CCCCC([*])[*]</chem>                             | -1.133 | 0 out of 8                 |
| FCFP_6                                 | 392412010   | <br><chem>[*]CC(N[*])C(=O)OC([*])[*]</chem>                        | -0.947 | 0 out of 6                 |
| FCFP_6                                 | 852937099   | <br><chem>[*]C([*])C(=O)N1CCC[C@H]1C(=[*])[*]</chem>              | -0.839 | 0 out of 5                 |

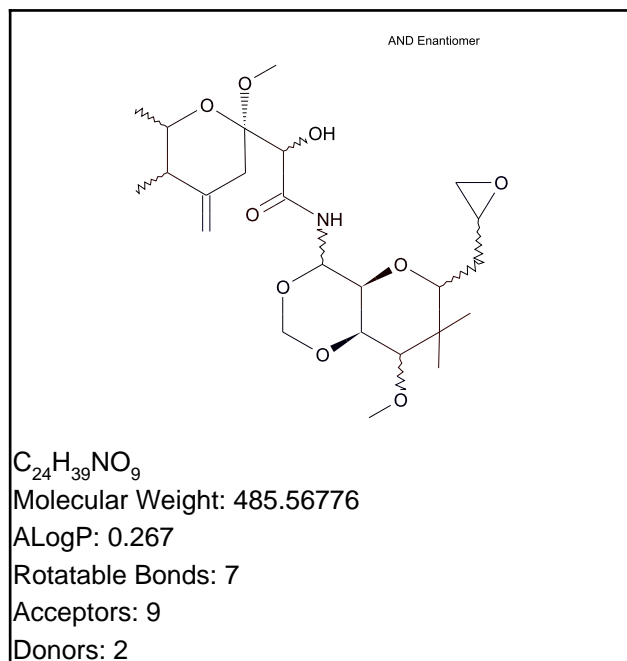

### Model Prediction

**Prediction: Carcinogen**

Probability: 0.283

Enrichment: 0.963

Bayesian Score: -0.860

Mahalanobis Distance: 12.892

Mahalanobis Distance p-value: 0.000406

Prediction: Positive if the Bayesian score is above the estimated best cutoff value from minimizing the false positive and false negative rate.

Probability: The estimated probability that the sample is in the positive category. This assumes that the Bayesian score follows a normal distribution and is different from the prediction using a cutoff.

Enrichment: An estimate of enrichment, that is, the increased likelihood (versus random) of this sample being in the category.

Bayesian Score: The standard Laplacian-modified Bayesian score.

Mahalanobis Distance: The Mahalanobis distance (MD) is the distance to the center of the training data. The larger the MD, the less trustworthy the prediction.

Mahalanobis Distance p-value: The p-value gives the fraction of training data with an MD greater than or equal to the one for the given sample, assuming normally distributed data. The smaller the p-value, the less trustworthy the prediction. For highly non-normal X properties (e.g., fingerprints), the MD p-value is wildly inaccurate.

### Structural Similar Compounds

| Name               | Bacampicillin                                                                       | Budesonide                                                                          | Amlodipine                                                                          |
|--------------------|-------------------------------------------------------------------------------------|-------------------------------------------------------------------------------------|-------------------------------------------------------------------------------------|
| Structure          | 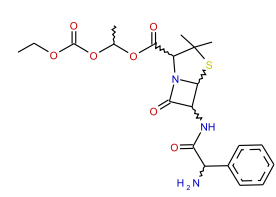 |  |  |
| Actual Endpoint    | Non-Carcinogen                                                                      | Non-Carcinogen                                                                      | Non-Carcinogen                                                                      |
| Predicted Endpoint | Non-Carcinogen                                                                      | Non-Carcinogen                                                                      | Non-Carcinogen                                                                      |
| Distance           | 0.706                                                                               | 0.754                                                                               | 0.756                                                                               |
| Reference          | US FDA (Centre for Drug Eval.& Res./Off. Testing & Res.) Sept. 1997                 | US FDA (Centre for Drug Eval.& Res./Off. Testing & Res.) Sept. 1997                 | US FDA (Centre for Drug Eval.& Res./Off. Testing & Res.) Sept. 1997                 |

### Model Applicability

Unknown features are fingerprint features in the query molecule, but not found in the training set.

1. All properties and OPS components are within expected ranges.

### Feature Contribution

#### Top features for positive contribution

| Fingerprint | Bit/Smiles | Feature Structure                                                                                                                  | Score | Carcinogen in training set |
|-------------|------------|------------------------------------------------------------------------------------------------------------------------------------|-------|----------------------------|
| FCFP_6      | -415245925 | 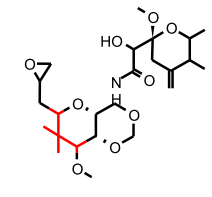<br>[*]C[C@]1(C)[C]C@@H1[*]<br>D[*]1C1(C)[*]1 | 0.710 | 16 out of 28               |

|                                        |             |                                                                                                                                              |        |                            |
|----------------------------------------|-------------|----------------------------------------------------------------------------------------------------------------------------------------------|--------|----------------------------|
| FCFP_6                                 | 566058135   | 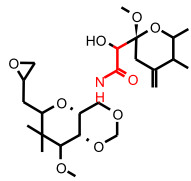<br><chem>[*]NC(=O)C([*])[*]</chem>                       | 0.447  | 17 out of 40               |
| FCFP_6                                 | -1043339860 | <br><chem>[*]C([*])([*])[C@H]1C<br/>[*]1C1([*])[*]</chem> | 0.383  | 24 out of 61               |
| Top Features for negative contribution |             |                                                                                                                                              |        |                            |
| Fingerprint                            | Bit/Smiles  | Feature Structure                                                                                                                            | Score  | Carcinogen in training set |
| FCFP_6                                 | 129344189   | <br><chem>[*]C(=C)[*]</chem>                              | -0.719 | 0 out of 4                 |
| FCFP_6                                 | 470041467   | <br><chem>[*]OCO[*]</chem>                               | -0.582 | 0 out of 3                 |
| FCFP_6                                 | -1043310069 | <br><chem>[*]OC(C([*])[*])C([*])<br/>[*])[*]</chem>     | -0.406 | 10 out of 59               |

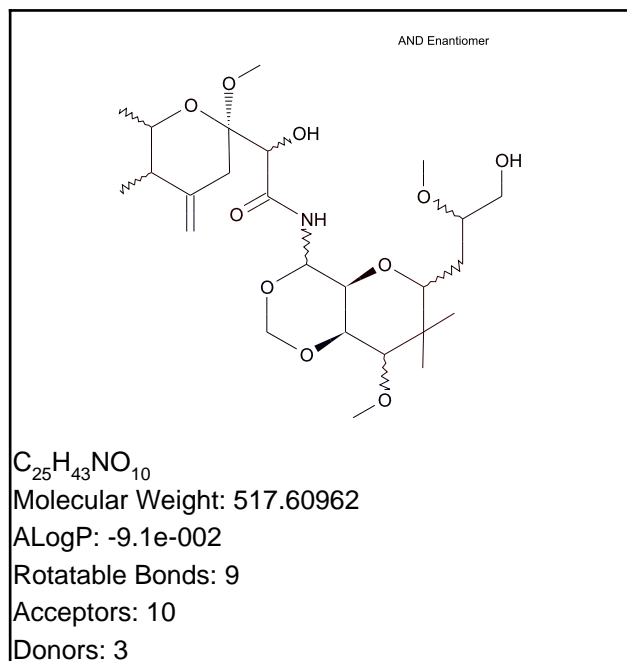

### Model Prediction

Prediction: Carcinogen

Probability: 0.273

Enrichment: 0.927

Bayesian Score: -1.285

Mahalanobis Distance: 12.566

Mahalanobis Distance p-value: 0.0012

Prediction: Positive if the Bayesian score is above the estimated best cutoff value from minimizing the false positive and false negative rate.

Probability: The estimated probability that the sample is in the positive category. This assumes that the Bayesian score follows a normal distribution and is different from the prediction using a cutoff.

Enrichment: An estimate of enrichment, that is, the increased likelihood (versus random) of this sample being in the category.

Bayesian Score: The standard Laplacian-modified Bayesian score.

Mahalanobis Distance: The Mahalanobis distance (MD) is the distance to the center of the training data. The larger the MD, the less trustworthy the prediction.

Mahalanobis Distance p-value: The p-value gives the fraction of training data with an MD greater than or equal to the one for the given sample, assuming normally distributed data. The smaller the p-value, the less trustworthy the prediction. For highly non-normal X properties (e.g., fingerprints), the MD p-value is wildly inaccurate.

### Structural Similar Compounds

| Name               | Bacampicillin                                                                       | Amlodipine                                                                          | Dipyridamole                                                                        |
|--------------------|-------------------------------------------------------------------------------------|-------------------------------------------------------------------------------------|-------------------------------------------------------------------------------------|
| Structure          | 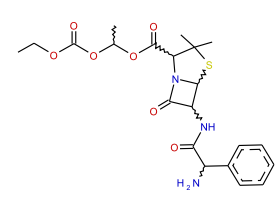 |  |  |
| Actual Endpoint    | Non-Carcinogen                                                                      | Non-Carcinogen                                                                      | Non-Carcinogen                                                                      |
| Predicted Endpoint | Non-Carcinogen                                                                      | Non-Carcinogen                                                                      | Non-Carcinogen                                                                      |
| Distance           | 0.728                                                                               | 0.832                                                                               | 0.844                                                                               |
| Reference          | US FDA (Centre for Drug Eval.& Res./Off. Testing & Res.) Sept. 1997                 | US FDA (Centre for Drug Eval.& Res./Off. Testing & Res.) Sept. 1997                 | US FDA (Centre for Drug Eval.& Res./Off. Testing & Res.) Sept. 1997                 |

### Model Applicability

Unknown features are fingerprint features in the query molecule, but not found in the training set.

1. All properties and OPS components are within expected ranges.

### Feature Contribution

#### Top features for positive contribution

| Fingerprint | Bit/Smiles | Feature Structure                                                                                                            | Score | Carcinogen in training set |
|-------------|------------|------------------------------------------------------------------------------------------------------------------------------|-------|----------------------------|
| FCFP_6      | -415245925 | 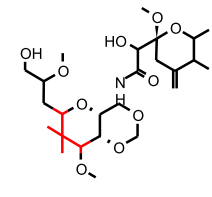<br>[*]C[C@]1(C)[C]C@@H([*])D1C1C1(*)C1 | 0.710 | 16 out of 28               |

|                                        |             |                                                                                                                                                                 |        |                            |
|----------------------------------------|-------------|-----------------------------------------------------------------------------------------------------------------------------------------------------------------|--------|----------------------------|
| FCFP_6                                 | 566058135   | 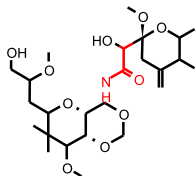<br><chem>[*]NC(=O)C([*])([*])</chem>                                        | 0.447  | 17 out of 40               |
| FCFP_6                                 | -1043339860 | <br><chem>[*]C([*])([*])([*])[C@H]1C</chem><br><chem>[*]1C1([*])([*])</chem> | 0.383  | 24 out of 61               |
| Top Features for negative contribution |             |                                                                                                                                                                 |        |                            |
| Fingerprint                            | Bit/Smiles  | Feature Structure                                                                                                                                               | Score  | Carcinogen in training set |
| FCFP_6                                 | 129344189   | <br><chem>[*]C(=C)[*]</chem>                                                 | -0.719 | 0 out of 4                 |
| FCFP_6                                 | 470041467   | <br><chem>[*]OCO[*]</chem>                                                  | -0.582 | 0 out of 3                 |
| FCFP_6                                 | -1043310069 | <br><chem>[*]OC(C([*])([*])C([*])</chem><br><chem>[*])</chem>              | -0.406 | 10 out of 59               |

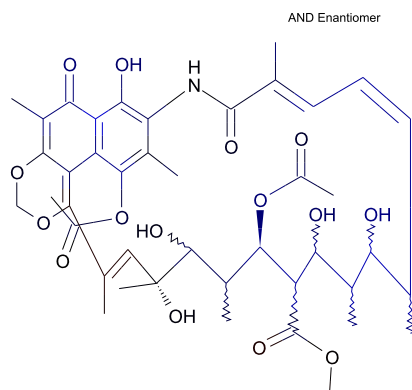
$$\text{C}_{42}\text{H}_{53}\text{NO}_{15}$$

Molecular Weight: 811.86791

ALogP: 2.745

Rotatable Bonds: 6

Acceptors: 15

Donors: 6

## Model Prediction

**Prediction: Non-Carcinogen**

Probability: 0.123

Enrichment: 0.418

Bayesian Score: -11.857

Mahalanobis Distance: 13.906

Mahalanobis Distance p-value: 9.48e-006

Prediction: Positive if the Bayesian score is above the estimated best cutoff value from minimizing the false positive and false negative rate.

**Probability:** The estimated probability that the sample is in the positive category. This assumes that the Bayesian score follows a normal distribution and is different from the prediction using a cutoff.

Enrichment: An estimate of enrichment, that is, the increased likelihood (versus random) of this sample being in the category.  
Bayesian Score: The standard Laplacian-modified Bayesian score.

**Mahalanobis Distance:** The Mahalanobis distance (MD) is the distance to the center of the training data. The larger the MD, the less trustworthy the prediction.

Mahalanobis Distance p-value: The p-value gives the fraction of training data with an MD greater than or equal to the one for the given sample, assuming normally distributed data. The smaller the p-value, the less trustworthy the prediction. For highly non-normal X properties (e.g., fingerprints), the MD p-value is wildly inaccurate.

## Structural Similar Compounds

| Name               | Rifampin                                                                            | Rifabutin                                                                           | Erythromycin                                                                        |
|--------------------|-------------------------------------------------------------------------------------|-------------------------------------------------------------------------------------|-------------------------------------------------------------------------------------|
| Structure          | 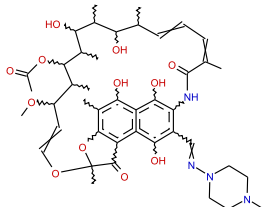 |  |  |
| Actual Endpoint    | Non-Carcinogen                                                                      | Non-Carcinogen                                                                      | Non-Carcinogen                                                                      |
| Predicted Endpoint | Non-Carcinogen                                                                      | Non-Carcinogen                                                                      | Non-Carcinogen                                                                      |
| Distance           | 0.431                                                                               | 0.594                                                                               | 0.827                                                                               |
| Reference          | US FDA (Centre for Drug Eval.& Res./Off. Testing & Res.) Sept. 1997                 | US FDA (Centre for Drug Eval.& Res./Off. Testing & Res.) Sept. 1997                 | US FDA (Centre for Drug Eval.& Res./Off. Testing & Res.) Sept. 1997                 |

## Model Applicability

Unknown features are fingerprint features in the query molecule, but not found in the training set.

1. All properties and OPS components are within expected ranges.

## Feature Contribution

### Top features for positive contribution

| Fingerprint | Bit/Smiles | Feature Structure                                                                                                                                                                                       | Score | Carcinogen in training set |
|-------------|------------|---------------------------------------------------------------------------------------------------------------------------------------------------------------------------------------------------------|-------|----------------------------|
| FCFP_6      | 1175665944 | 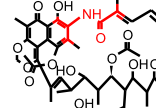<br><chem>[*]C(=O)N[C@@H](C(=O)O[C@H]1CC[C@@H]2[C@@H](CO[C@H]3[C@H]([C@@H](O[C@H]3C[C@H]2O)CO)O)C1=O)C(=O)O</chem> | 0.655 | 7 out of 12                |



|                                        |             |                                                                                                                                                                   |        |                            |
|----------------------------------------|-------------|-------------------------------------------------------------------------------------------------------------------------------------------------------------------|--------|----------------------------|
| FCFP_6                                 | 451847724   | 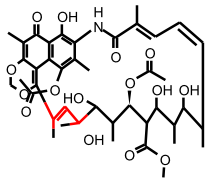<br><chem>[*]\C=C\C(=[*])[*]</chem>                                            | 0.479  | 21 out of 48               |
| FCFP_6                                 | 566058135   | <br><chem>[*]NC(=O)C([*])[*]</chem>                                            | 0.447  | 17 out of 40               |
| Top Features for negative contribution |             |                                                                                                                                                                   |        |                            |
| Fingerprint                            | Bit/Smiles  | Feature Structure                                                                                                                                                 | Score  | Carcinogen in training set |
| FCFP_6                                 | -1096767684 | <br><chem>[*]C(=[*])O([*])1:[c](C([*])1:[*])1:[*])1:[*]1C(=[*])[*]</chem>      | -0.947 | 0 out of 6                 |
| FCFP_6                                 | 449814859   | <br><chem>[*][c](:[*]):[c]1C(=O)C(=[*])[*][c]:1:[*])C</chem>                 | -0.947 | 0 out of 6                 |
| FCFP_6                                 | 524083277   | <br><chem>[*]C1=[*]C(=[*])[c]2:[c]([*]):[*]:[c]([*]):[c](O):[c]:2C1=O</chem> | -0.839 | 0 out of 5                 |

# Simeprevir

# TOPKAT\_Mouse\_Male\_FDA\_None\_vs\_Carcinogen

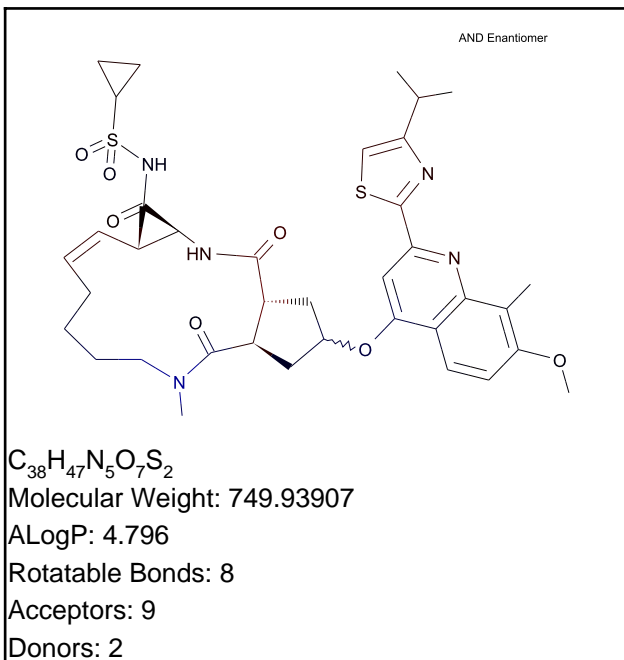

## Model Prediction

Prediction: Non-Carcinogen

Probability: 0.258

Enrichment: 0.877

Bayesian Score: -1.921

Mahalanobis Distance: 18.337

Mahalanobis Distance p-value: 6.22e-015

Prediction: Positive if the Bayesian score is above the estimated best cutoff value from minimizing the false positive and false negative rate.

Probability: The estimated probability that the sample is in the positive category. This assumes that the Bayesian score follows a normal distribution and is different from the prediction using a cutoff.

Enrichment: An estimate of enrichment, that is, the increased likelihood (versus random) of this sample being in the category.

Bayesian Score: The standard Laplacian-modified Bayesian score.

Mahalanobis Distance: The Mahalanobis distance (MD) is the distance to the center of the training data. The larger the MD, the less trustworthy the prediction.

Mahalanobis Distance p-value: The p-value gives the fraction of training data with an MD greater than or equal to the one for the given sample, assuming normally distributed data. The smaller the p-value, the less trustworthy the prediction. For highly non-normal X properties (e.g., fingerprints), the MD p-value is wildly inaccurate.

## Structural Similar Compounds

| Name               | Reserpine                                                                           | Bromocriptine                                                                       | Itraconazole                                                                        |
|--------------------|-------------------------------------------------------------------------------------|-------------------------------------------------------------------------------------|-------------------------------------------------------------------------------------|
| Structure          | 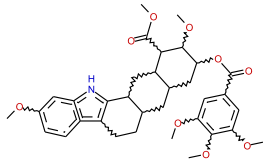 |  |  |
| Actual Endpoint    | Carcinogen                                                                          | Non-Carcinogen                                                                      | Non-Carcinogen                                                                      |
| Predicted Endpoint | Carcinogen                                                                          | Non-Carcinogen                                                                      | Non-Carcinogen                                                                      |
| Distance           | 0.775                                                                               | 0.832                                                                               | 0.865                                                                               |
| Reference          | US FDA (Centre for Drug Eval.& Res./Off. Testing & Res.) Sept. 1997                 | US FDA (Centre for Drug Eval.& Res./Off. Testing & Res.) Sept. 1997                 | US FDA (Centre for Drug Eval.& Res./Off. Testing & Res.) Sept. 1997                 |

## Model Applicability

Unknown features are fingerprint features in the query molecule, but not found in the training set.

- All properties and OPS components are within expected ranges.
- Unknown FCFP\_2 feature: 690481386: [\*]:[c](:[\*])[c]1:n:[\*]:[\*]:s:1

## Feature Contribution

### Top features for positive contribution

| Fingerprint | Bit/Smiles | Feature Structure                                                                                                                                           | Score | Carcinogen in training set |
|-------------|------------|-------------------------------------------------------------------------------------------------------------------------------------------------------------|-------|----------------------------|
| FCFP_6      | -55265897  | 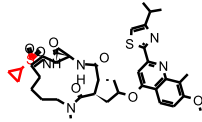<br><chem>*[C]([*])([*])[C@H]1C<br/>CC([*])([*])[*]C1=[*]<br/>]</chem> | 0.594 | 17 out of 34               |

| FCFP_6                                 | -1289661876 | 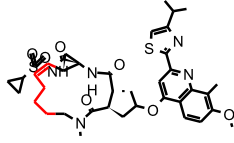<br><chem>[*]CCC\C=C/[*]</chem>                             | 0.517  | 2 out of 3                 |
|----------------------------------------|-------------|------------------------------------------------------------------------------------------------------------------------------------------------|--------|----------------------------|
| FCFP_6                                 | 451847724   | <br><chem>[*]\C=C\C(=[*])[*]</chem>                         | 0.479  | 21 out of 48               |
| Top Features for negative contribution |             |                                                                                                                                                |        |                            |
| Fingerprint                            | Bit/Smiles  | Feature Structure                                                                                                                              | Score  | Carcinogen in training set |
| FCFP_6                                 | -98332825   | <br><chem>[*][C@@H]1CCCN1[*]</chem>                         | -0.793 | 1 out of 13                |
| FCFP_6                                 | -1972798083 | <br><chem>[*]:[cH]:[c](OC1C[*][*]C1):[c](:[*]):[*]</chem> | -0.582 | 0 out of 3                 |
| FCFP_6                                 | -1553874037 | <br><chem>[*][C@@H]1[*][*]CN1C(=[*])[*]</chem>            | -0.450 | 5 out of 32                |

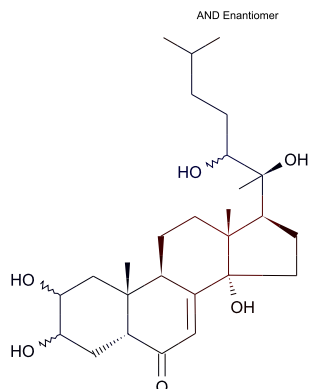

$C_{27}H_{44}O_6$

Molecular Weight: 464.63466

ALogP: 2.489

Rotatable Bonds: 5

Acceptors: 6

Donors: 5

## Model Prediction

**Prediction: Multiple-Carcinogen**

Probability: 0.242

Enrichment: 0.804

Bayesian Score: -0.642

Mahalanobis Distance: 9.663

Mahalanobis Distance p-value: 0.0309

Prediction: Positive if the Bayesian score is above the estimated best cutoff value from minimizing the false positive and false negative rate.

Probability: The estimated probability that the sample is in the positive category. This assumes that the Bayesian score follows a normal distribution and is different from the prediction using a cutoff.

Enrichment: An estimate of enrichment, that is, the increased likelihood (versus random) of this sample being in the category.

Bayesian Score: The standard Laplacian-modified Bayesian score.

Mahalanobis Distance: The Mahalanobis distance (MD) is the distance to the center of the training data. The larger the MD, the less trustworthy the prediction.

Mahalanobis Distance p-value: The p-value gives the fraction of training data with an MD greater than or equal to the one for the given sample, assuming normally distributed data. The smaller the p-value, the less trustworthy the prediction. For highly non-normal X properties (e.g., fingerprints), the MD p-value is wildly inaccurate.

## Structural Similar Compounds

| Name               | Triamcinolone                                                       | Glimepride                                                          | Sulfasalazine                                                       |
|--------------------|---------------------------------------------------------------------|---------------------------------------------------------------------|---------------------------------------------------------------------|
| Structure          |                                                                     |                                                                     |                                                                     |
| Actual Endpoint    | Single-Carcinogen                                                   | Single-Carcinogen                                                   | Single-Carcinogen                                                   |
| Predicted Endpoint | Single-Carcinogen                                                   | Single-Carcinogen                                                   | Single-Carcinogen                                                   |
| Distance           | 0.787                                                               | 0.898                                                               | 0.987                                                               |
| Reference          | US FDA (Centre for Drug Eval.& Res./Off. Testing & Res.) Sept. 1997 | US FDA (Centre for Drug Eval.& Res./Off. Testing & Res.) Sept. 1997 | US FDA (Centre for Drug Eval.& Res./Off. Testing & Res.) Sept. 1997 |

## Model Applicability

Unknown features are fingerprint features in the query molecule, but not found in the training set.

1. All properties and OPS components are within expected ranges.

## Feature Contribution

### Top features for positive contribution

| Fingerprint | Bit/Smiles  | Feature Structure                                                 | Score | Multiple-Carcinogen in training set |
|-------------|-------------|-------------------------------------------------------------------|-------|-------------------------------------|
| FCFP_12     | -1742546106 | <br><chem>*[C@@H]1[C@]2([C@@H]1[C@H]([C@@H]([C@@H]2O)O)O)O</chem> | 0.597 | 7 out of 10                         |

|                                        |             |                                                                                                                                              |        |                                     |
|----------------------------------------|-------------|----------------------------------------------------------------------------------------------------------------------------------------------|--------|-------------------------------------|
| FCFP_12                                | -415245925  | 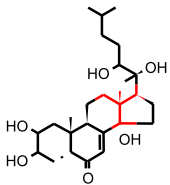<br><chem>[*]C[C@]1(C)[C@@H]([*])C1(C)[*]</chem>           | 0.535  | 10 out of 16                        |
| FCFP_12                                | -1870530637 | <br><chem>[*]CCC(C)C</chem>                               | 0.400  | 1 out of 1                          |
| Top Features for negative contribution |             |                                                                                                                                              |        |                                     |
| Fingerprint                            | Bit/Smiles  | Feature Structure                                                                                                                            | Score  | Multiple-Carcinogen in training set |
| FCFP_12                                | 354117335   | <br><chem>[*]C([*])CCC(O)C([*])</chem>                    | -0.859 | 0 out of 4                          |
| FCFP_12                                | 351491212   | <br><chem>[*]C([*])[C@@]1(C)CC(O)C([*])[C@H]1[*]</chem> | -0.519 | 0 out of 2                          |
| FCFP_12                                | 1970621279  | <br><chem>[*]CCC(O)[C@](C)(O)C([*])</chem>              | -0.293 | 0 out of 1                          |



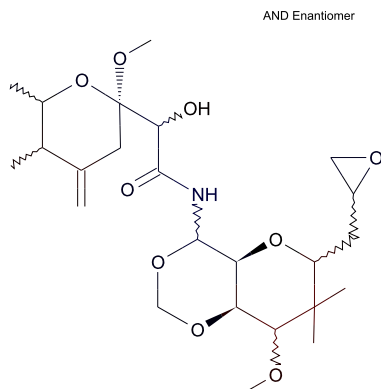
$$\text{C}_{24}\text{H}_{39}\text{NO}_9$$

Molecular Weight: 485.56776

|ALogP: 0.267

Rotatable Bonds: 7

Acceptors: 9

Donors: 2

## Model Prediction

**Prediction: Multiple-Carcinogen**

Probability: 0.234

Enrichment: 0.778

Bayesian Score: -0.949

Mahalanobis Distance: 13.752

Mahalanobis Distance p-value: 2.48e-005

Prediction: Positive if the Bayesian score is above the estimated best cutoff value from minimizing the false positive and false negative rate.

**Probability:** The estimated probability that the sample is in the positive category. This assumes that the Bayesian score follows a normal distribution and is different from the prediction using a cutoff.

Enrichment: An estimate of enrichment, that is, the increased likelihood (versus random) of this sample being in the category.  
Bayesian Score: The standard Laplacian-modified Bayesian score.

**Mahalanobis Distance:** The Mahalanobis distance (MD) is the distance to the center of the training data. The larger the MD, the less trustworthy the prediction.

Mahalanobis Distance p-value: The p-value gives the fraction of training data with an MD greater than or equal to the one for the given sample, assuming normally distributed data. The smaller the p-value, the less trustworthy the prediction. For highly non-normal X properties (e.g., fingerprints), the MD p-value is wildly inaccurate.

## Structural Similar Compounds

| Name               | Flunisolide                                                                         | Sulfasalazine                                                                       | Dihydroxymethylfuratrizine                                                          |
|--------------------|-------------------------------------------------------------------------------------|-------------------------------------------------------------------------------------|-------------------------------------------------------------------------------------|
| Structure          | 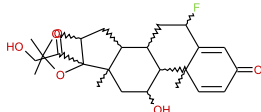 |  |  |
| Actual Endpoint    | Single-Carcinogen                                                                   | Single-Carcinogen                                                                   | Multiple-Carcinogen                                                                 |
| Predicted Endpoint | Single-Carcinogen                                                                   | Single-Carcinogen                                                                   | Multiple-Carcinogen                                                                 |
| Distance           | 0.918                                                                               | 0.928                                                                               | 0.958                                                                               |
| Reference          | US FDA (Centre for Drug Eval.& Res./Off. Testing & Res.) Sept. 1997                 | US FDA (Centre for Drug Eval.& Res./Off. Testing & Res.) Sept. 1997                 | US FDA (Centre for Drug Eval.& Res./Off. Testing & Res.) Sept. 1997                 |

### Model Applicability

Unknown features are fingerprint features in the query molecule, but not found in the training set.

1. All properties and OPS components are within expected ranges.
2. Unknown FCFP\_2 feature: 470041467: [\*]OCO[\*]
3. Unknown FCFP\_2 feature: 129344189: [\*]C(=C)[\*]

## Feature Contribution

## Top features for positive contribution

| Fingerprint | Bit/Smiles  | Feature Structure                                                                                                                     | Score | Multiple-Carcinogen in training set |
|-------------|-------------|---------------------------------------------------------------------------------------------------------------------------------------|-------|-------------------------------------|
| FCFP_12     | -1043310069 | 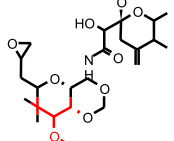 <chem>[*]OC(C([*])([*])C([*])X([*])D[*])</chem> | 0.597 | 7 out of 10                         |

$$[*]OC(C([*])([*])C([*])([*)][*])$$

|                                        |             |                                                                                                                       |        |                                     |
|----------------------------------------|-------------|-----------------------------------------------------------------------------------------------------------------------|--------|-------------------------------------|
| FCFP_12                                | -415245925  | 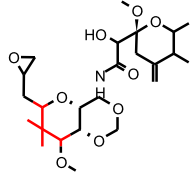<br>[*]C[C@]1(C)[C@H]([*])C1C1C1C1 | 0.535  | 10 out of 16                        |
| FCFP_12                                | 346066116   | <br>[*]C([*])C(OC)C([*])([*])[*]   | 0.400  | 1 out of 1                          |
| Top Features for negative contribution |             |                                                                                                                       |        |                                     |
| Fingerprint                            | Bit/Smiles  | Feature Structure                                                                                                     | Score  | Multiple-Carcinogen in training set |
| FCFP_12                                | 566058135   | <br>[*]NC(=O)C([*])[*]             | -0.528 | 3 out of 17                         |
| FCFP_12                                | 699559848   | <br>[*]NC(O[*])C([*])[*]         | -0.519 | 0 out of 2                          |
| FCFP_12                                | -1272768868 | <br>[*]C1CO1                     | -0.347 | 5 out of 22                         |





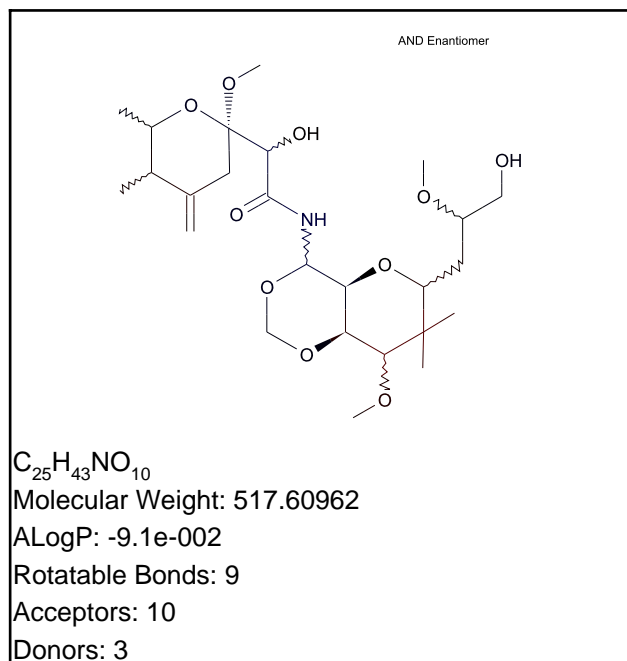

## Model Prediction

Prediction: Multiple-Carcinogen

Probability: 0.256

Enrichment: 0.850

Bayesian Score: -0.144

Mahalanobis Distance: 11.664

Mahalanobis Distance p-value: 0.0011

Prediction: Positive if the Bayesian score is above the estimated best cutoff value from minimizing the false positive and false negative rate.

Probability: The estimated probability that the sample is in the positive category. This assumes that the Bayesian score follows a normal distribution and is different from the prediction using a cutoff.

Enrichment: An estimate of enrichment, that is, the increased likelihood (versus random) of this sample being in the category.

Bayesian Score: The standard Laplacian-modified Bayesian score.

Mahalanobis Distance: The Mahalanobis distance (MD) is the distance to the center of the training data. The larger the MD, the less trustworthy the prediction.

Mahalanobis Distance p-value: The p-value gives the fraction of training data with an MD greater than or equal to the one for the given sample, assuming normally distributed data. The smaller the p-value, the less trustworthy the prediction. For highly non-normal X properties (e.g., fingerprints), the MD p-value is wildly inaccurate.

## Structural Similar Compounds

| Name               | Methotrexate                                                                        | Sulfasalazine                                                                       | Primidolol                                                                          |
|--------------------|-------------------------------------------------------------------------------------|-------------------------------------------------------------------------------------|-------------------------------------------------------------------------------------|
| Structure          | 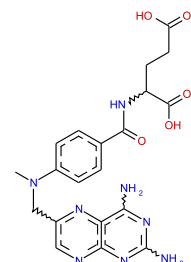 |  |  |
| Actual Endpoint    | Single-Carcinogen                                                                   | Single-Carcinogen                                                                   | Single-Carcinogen                                                                   |
| Predicted Endpoint | Single-Carcinogen                                                                   | Single-Carcinogen                                                                   | Single-Carcinogen                                                                   |
| Distance           | 0.993                                                                               | 0.996                                                                               | 1.083                                                                               |
| Reference          | US FDA (Centre for Drug Eval.& Res./Off. Testing & Res.) Sept. 1997                 | US FDA (Centre for Drug Eval.& Res./Off. Testing & Res.) Sept. 1997                 | US FDA (Centre for Drug Eval.& Res./Off. Testing & Res.) Sept. 1997                 |

## Model Applicability

Unknown features are fingerprint features in the query molecule, but not found in the training set.

1. All properties and OPS components are within expected ranges.
2. Unknown FCFP\_2 feature: 470041467: [\*]OCO[\*]
3. Unknown FCFP\_2 feature: 129344189: [\*]C(=C)[\*]

## Feature Contribution

### Top features for positive contribution

| Fingerprint | Bit/Smiles  | Feature Structure                                                                                                 | Score | Multiple-Carcinogen in training set |
|-------------|-------------|-------------------------------------------------------------------------------------------------------------------|-------|-------------------------------------|
| FCFP_12     | -1043310069 | 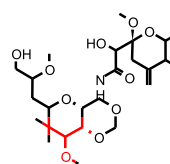<br>[*]OC(C(=O)O)C(=O)C(=O)O | 0.597 | 7 out of 10                         |

|                                        |            |                                                                                                                                         |        |                                     |
|----------------------------------------|------------|-----------------------------------------------------------------------------------------------------------------------------------------|--------|-------------------------------------|
| FCFP_12                                | -415245925 | 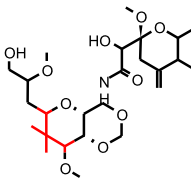<br><chem>[*]C[C@]1(C)C(C@@H)([*])C1C1([*])[*]</chem> | 0.535  | 10 out of 16                        |
| FCFP_12                                | 346066116  | <br><chem>[*]C([*])C(OC)C([*])([*])[*]</chem>        | 0.400  | 1 out of 1                          |
| Top Features for negative contribution |            |                                                                                                                                         |        |                                     |
| Fingerprint                            | Bit/Smiles | Feature Structure                                                                                                                       | Score  | Multiple-Carcinogen in training set |
| FCFP_12                                | 566058135  | <br><chem>[*]NC(=O)C([*])[*]</chem>                  | -0.528 | 3 out of 17                         |
| FCFP_12                                | 699559848  | <br><chem>[*]NC(O[*])C([*])[*]</chem>              | -0.519 | 0 out of 2                          |
| FCFP_12                                | -675291618 | <br><chem>[*]C([*])CC(CO)OC</chem>                 | -0.293 | 0 out of 1                          |



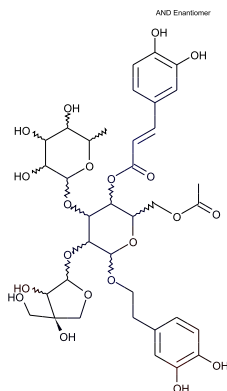
$$\text{C}_{36}\text{H}_{46}\text{O}_{20}$$

Molecular Weight: 798.73843

|ALogP: -0.546

Rotatable Bonds: 16

Acceptors: 20

Donors: 10

## Model Prediction

Prediction: Mild

Probability: 0.781

Enrichment: 1.134

Bayesian Score: -1.654

Mahalanobis Distance: 23.979

Mahalanobis Distance p-value: 4.97e-058

Prediction: Positive if the Bayesian score is above the estimated best cutoff value from minimizing the false positive and false negative rate.

Probability: The estimated probability that the sample is in the positive category. This assumes that the Bayesian score follows a normal distribution and is different from the prediction using a cutoff.

Enrichment: An estimate of enrichment, that is, the increased likelihood (versus random) of this sample being in the category.  
Bayesian Score: The standard Laplacian-modified Bayesian score.

**Mahalanobis Distance:** The Mahalanobis distance (MD) is the distance to the center of the training data. The larger the MD, the less trustworthy the prediction.

Mahalanobis Distance p-value: The p-value gives the fraction of training data with an MD greater than or equal to the one for the given sample, assuming normally distributed data. The smaller the p-value, the less trustworthy the prediction. For highly non-normal X properties (e.g., fingerprints), the MD p-value is wildly inaccurate.

## Structural Similar Compounds

| Name               | Methanol; (s-triazine-2;4;6-triyltrinitrilo)hexa-                                   | 2-Naphthalenesulfonic acid; 5;6'-iminobis(1-hydroxy-                                | 1;3;6-NAPHTHALENE TRISULFONIC ACID;7-AMINO-                                         |
|--------------------|-------------------------------------------------------------------------------------|-------------------------------------------------------------------------------------|-------------------------------------------------------------------------------------|
| Structure          | 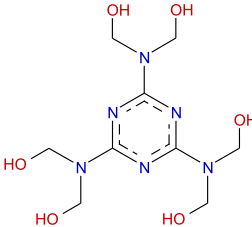 |  |  |
| Actual Endpoint    | Moderate_Severe                                                                     | Mild                                                                                | Mild                                                                                |
| Predicted Endpoint | Moderate_Severe                                                                     | Mild                                                                                | Mild                                                                                |
| Distance           | 1.957                                                                               | 2.188                                                                               | 2.360                                                                               |
| Reference          | Prehled Prumyslove Toxikologie; Organicke Latky; Marhold; J. -;876;86               | Prehled Prumyslove Toxikologie; Organicke Latky; Marhold; J. pp 1065;86             | 28ZPAK-;190;72                                                                      |

## Model Applicability

Unknown features are fingerprint features in the query molecule, but not found in the training set.

1. Num\_H\_Donors out of range. Value: 10. Training min, max, mean, SD: 0, 6, 0.71878, 0.8939.
2. Num\_H\_Acceptors out of range. Value: 20. Training min, max, mean, SD: 0, 19, 2.6994, 2.203.
3. OPS\_PC8 out of range. Value: -4.4632. Training min, max, SD, explained variance: -3.8477, 8.3204, 1.516, 0.0280.

## Feature Contribution

| <b>Top features for positive contribution</b> |                   |                                                                                     |              |                                            |
|-----------------------------------------------|-------------------|-------------------------------------------------------------------------------------|--------------|--------------------------------------------|
| <b>Fingerprint</b>                            | <b>Bit/Smiles</b> | <b>Feature Structure</b>                                                            | <b>Score</b> | <b>Moderate_Severe<br/>in training set</b> |
| FCFP_10                                       | -497728148        | <br>AND Enantiomer<br><chem>[*]CC([cH]:[cH]):[cH]![*]<br/>*: [c]([*]):[cH]:1</chem> | 0.356        | 24 out of 25                               |

| FCFP_10                                | -1272709286 | <p>AND Enantiomer</p> 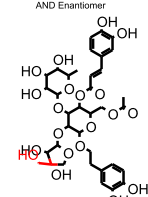 <p>[*]C([*])([*])CO</p>                                    | 0.285  | 234 out of 266                     |
|----------------------------------------|-------------|----------------------------------------------------------------------------------------------------------------------------------------------------------------------|--------|------------------------------------|
| FCFP_10                                | 1070061035  | <p>AND Enantiomer</p>  <p>[*]C([*])O</p>                                          | 0.239  | 284 out of 338                     |
| Top Features for negative contribution |             |                                                                                                                                                                      |        |                                    |
| Fingerprint                            | Bit/Smiles  | Feature Structure                                                                                                                                                    | Score  | Moderate_Severe<br>in training set |
| FCFP_10                                | -428284881  | <p>AND Enantiomer</p>  <p>[*]C([*])C(OC(=O)C=[*])C([*])C([*])C([*])</p>           | -0.580 | 4 out of 12                        |
| FCFP_10                                | 1132363037  | <p>AND Enantiomer</p>  <p>[*]OC1C([*])([*])C([*])C(O[*])C1OC([*])([*])C([*])</p> | -0.507 | 0 out of 1                         |
| FCFP_10                                | -146015125  | <p>AND Enantiomer</p>  <p>[*]C([*])C=C\c([*])cH\[*])cH\[*])</p>                 | -0.507 | 0 out of 1                         |

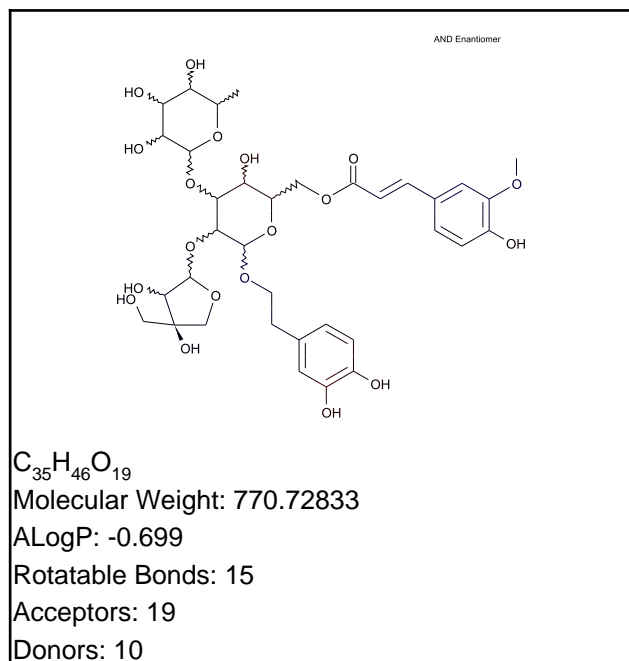

## Model Prediction

Prediction: Mild

Probability: 0.789

Enrichment: 1.145

Bayesian Score: -1.397

Mahalanobis Distance: 23.079

Mahalanobis Distance p-value: 1.07e-052

Prediction: Positive if the Bayesian score is above the estimated best cutoff value from minimizing the false positive and false negative rate.

Probability: The estimated probability that the sample is in the positive category. This assumes that the Bayesian score follows a normal distribution and is different from the prediction using a cutoff.

Enrichment: An estimate of enrichment, that is, the increased likelihood (versus random) of this sample being in the category. Bayesian Score: The standard Laplacian-modified Bayesian score.

Mahalanobis Distance: The Mahalanobis distance (MD) is the distance to the center of the training data. The larger the MD, the less trustworthy the prediction.

Mahalanobis Distance p-value: The p-value gives the fraction of training data with an MD greater than or equal to the one for the given sample, assuming normally distributed data. The smaller the p-value, the less trustworthy the prediction. For highly non-normal X properties (e.g., fingerprints), the MD p-value is wildly inaccurate.

## Structural Similar Compounds

| Name               | Methanol; (s-triazine-2;4;6-triyltrinitro)hexa-                                     | 2-Naphthalenesulfonic acid; 5,6'-iminobis(1-hydroxy-                                | 1;3;6-NAPHTHALENE TRISULFONIC ACID;7-AMINO-                                         |
|--------------------|-------------------------------------------------------------------------------------|-------------------------------------------------------------------------------------|-------------------------------------------------------------------------------------|
| Structure          | 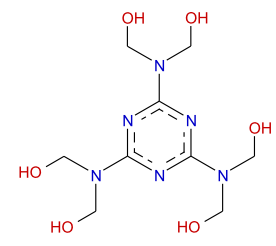 |  |  |
| Actual Endpoint    | Moderate_Severe                                                                     | Mild                                                                                | Mild                                                                                |
| Predicted Endpoint | Moderate_Severe                                                                     | Mild                                                                                | Mild                                                                                |
| Distance           | 1.882                                                                               | 2.119                                                                               | 2.297                                                                               |
| Reference          | Prehled Prumyslove Toxikologie; Organicke Latky; Marhold; J. -;876;86               | Prehled Prumyslove Toxikologie; Organicke Latky; Marhold; J. pp 1065;86             | 28ZPAK-;190;72                                                                      |

## Model Applicability

Unknown features are fingerprint features in the query molecule, but not found in the training set.

1. Num\_H\_Donors out of range. Value: 10. Training min, max, mean, SD: 0, 6, 0.71878, 0.8939.
2. OPS PC8 out of range. Value: -4.2603. Training min, max, SD, explained variance: -3.8477, 8.3204, 1.516, 0.0280.

## Feature Contribution

### Top features for positive contribution

| Fingerprint | Bit/Smiles | Feature Structure                                                                                                                | Score | Moderate_Severe in training set |
|-------------|------------|----------------------------------------------------------------------------------------------------------------------------------|-------|---------------------------------|
| FCFP_10     | -497728148 | 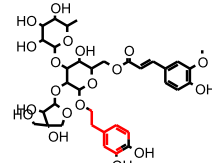<br>[*]CC[c]1:[cH]:[cH]:[*]:[c]([*]):[cH]:1 | 0.356 | 24 out of 25                    |

|                                        |             |                                                                                                                                    |        |                                 |
|----------------------------------------|-------------|------------------------------------------------------------------------------------------------------------------------------------|--------|---------------------------------|
| FCFP_10                                | -2106701143 | 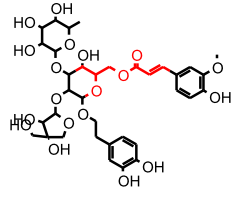<br><chem>[*]OC(COC(=O)C=C[*])C(=O)[*]</chem>   | 0.294  | 3 out of 3                      |
| FCFP_10                                | -1272709286 | <br><chem>[*]C([*])([*])CO</chem>               | 0.285  | 234 out of 266                  |
| Top Features for negative contribution |             |                                                                                                                                    |        |                                 |
| Fingerprint                            | Bit/Smiles  | Feature Structure                                                                                                                  | Score  | Moderate_Severe in training set |
| FCFP_10                                | -1977641857 | <br><chem>[*][c](:[*]):[c](OC):[cH]:[*]</chem>  | -0.780 | 4 out of 15                     |
| FCFP_10                                | -2005207466 | <br><chem>[*]OCC[c](:[cH]:[*]):[cH]:[*]</chem> | -0.507 | 0 out of 1                      |
| FCFP_10                                | 205247261   | <br><chem>[*]C([*])OCC[c](:[*]):[*]</chem>    | -0.507 | 0 out of 1                      |



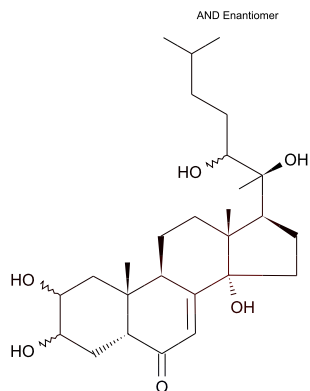
 $C_{27}H_{44}O_6$ 

Molecular Weight: 464.63466

ALogP: 2.489

Rotatable Bonds: 5

Acceptors: 6

Donors: 5

## Model Prediction

Prediction: Moderate\_Severe

Probability: 0.850

Enrichment: 1.233

Bayesian Score: 1.869

Mahalanobis Distance: 13.747

Mahalanobis Distance p-value: 1.98e-009

Prediction: Positive if the Bayesian score is above the estimated best cutoff value from minimizing the false positive and false negative rate.

Probability: The estimated probability that the sample is in the positive category. This assumes that the Bayesian score follows a normal distribution and is different from the prediction using a cutoff.

Enrichment: An estimate of enrichment, that is, the increased likelihood (versus random) of this sample being in the category.

Bayesian Score: The standard Laplacian-modified Bayesian score.

Mahalanobis Distance: The Mahalanobis distance (MD) is the distance to the center of the training data. The larger the MD, the less trustworthy the prediction.

Mahalanobis Distance p-value: The p-value gives the fraction of training data with an MD greater than or equal to the one for the given sample, assuming normally distributed data. The smaller the p-value, the less trustworthy the prediction. For highly non-normal X properties (e.g., fingerprints), the MD p-value is wildly inaccurate.

## Structural Similar Compounds

| Name               | ANTHRAQUINONE; 1;5-DIAMINO-4;8-DIHYDROXY-3-(p-METHOXYPHENYL)- | 2-Naphthalenesulfonic acid; 5;6'-iminobis(1-hydroxy-                    | 4;4'-DIAMINO-1;1'-DIANTHRIMIDE |
|--------------------|---------------------------------------------------------------|-------------------------------------------------------------------------|--------------------------------|
| Structure          |                                                               |                                                                         |                                |
| Actual Endpoint    | Mild                                                          | Mild                                                                    | Mild                           |
| Predicted Endpoint | Mild                                                          | Mild                                                                    | Mild                           |
| Distance           | 0.847                                                         | 0.902                                                                   | 0.990                          |
| Reference          | 28ZPAK 245;72                                                 | Prehled Prumyslove Toxikologie; Organické Latky; Marhold; J. pp 1065;86 | 28ZPAK-;125;72                 |

## Model Applicability

Unknown features are fingerprint features in the query molecule, but not found in the training set.

1. All properties and OPS components are within expected ranges.

## Feature Contribution

### Top features for positive contribution

| Fingerprint | Bit/Smiles  | Feature Structure                                                          | Score | Moderate_Severe in training set |
|-------------|-------------|----------------------------------------------------------------------------|-------|---------------------------------|
| FCFP_10     | -1742546106 | <br><chem>*[C@@H]1[C@@]2([C@@H]([C@H]1[C@@H]([C@@H]([C@H]2O)O)O)O)O</chem> | 0.317 | 4 out of 4                      |

|                                        |            |                                                                                                                                                     |        |                                 |
|----------------------------------------|------------|-----------------------------------------------------------------------------------------------------------------------------------------------------|--------|---------------------------------|
| FCFP_10                                | 1904223630 | 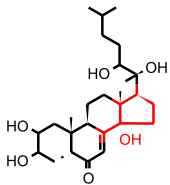<br><chem>[*][C@H]1CC[C@@](O)(C(=O)[*])C1([*])[*]</chem>          | 0.294  | 3 out of 3                      |
| FCFP_10                                | 1002543125 | <br><chem>[*][C@@H]1[*][C@@H]([*])C(=CC1=O)C([*])([*])[*]</chem> | 0.256  | 2 out of 2                      |
| Top Features for negative contribution |            |                                                                                                                                                     |        |                                 |
| Fingerprint                            | Bit/Smiles | Feature Structure                                                                                                                                   | Score  | Moderate_Severe in training set |
| FCFP_10                                | 565968762  | <br><chem>[*]C([*])C(=O)C=[*]</chem>                             | -0.372 | 17 out of 38                    |
| FCFP_10                                | 1872154524 | <br><chem>[*]C(=O)[*]</chem>                                    | -0.078 | 344 out of 563                  |
| FCFP_10                                | 136597326  | <br><chem>[*]C([*])C</chem>                                    | 0.000  | 422 out of 612                  |

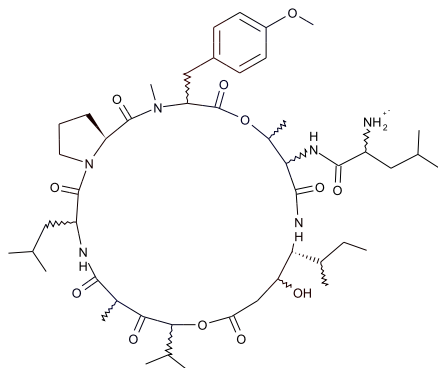
 $C_{49}H_{79}N_6O_{12}$ 

Molecular Weight: 944.18455

ALogP: 3.176

Rotatable Bonds: 13

Acceptors: 12

Donors: 5

## Model Prediction

Prediction: Moderate\_Severe

Probability: 0.817

Enrichment: 1.186

Bayesian Score: -0.256

Mahalanobis Distance: 23.061

Mahalanobis Distance p-value: 1.36e-052

Prediction: Positive if the Bayesian score is above the estimated best cutoff value from minimizing the false positive and false negative rate.

Probability: The estimated probability that the sample is in the positive category. This assumes that the Bayesian score follows a normal distribution and is different from the prediction using a cutoff.

Enrichment: An estimate of enrichment, that is, the increased likelihood (versus random) of this sample being in the category.

Bayesian Score: The standard Laplacian-modified Bayesian score.

Mahalanobis Distance: The Mahalanobis distance (MD) is the distance to the center of the training data. The larger the MD, the less trustworthy the prediction.

Mahalanobis Distance p-value: The p-value gives the fraction of training data with an MD greater than or equal to the one for the given sample, assuming normally distributed data. The smaller the p-value, the less trustworthy the prediction. For highly non-normal X properties (e.g., fingerprints), the MD p-value is wildly inaccurate.

## Structural Similar Compounds

| Name               | 2-Naphthalenesulfonic acid; 5;6'-iminobis(1-hydroxy-                    | 2;7-NAPHTHALENE DISULFONIC ACID;4-AMINO-5-HYDROXY-;P-TOLUENE SULFONATE (ESTER) | 2;7-Naphthalenedisulfonic acid;                                         |
|--------------------|-------------------------------------------------------------------------|--------------------------------------------------------------------------------|-------------------------------------------------------------------------|
| Structure          |                                                                         |                                                                                |                                                                         |
| Actual Endpoint    | Mild                                                                    | Moderate_Severe                                                                | Moderate_Severe                                                         |
| Predicted Endpoint | Mild                                                                    | Moderate_Severe                                                                | Moderate_Severe                                                         |
| Distance           | 1.447                                                                   | 1.525                                                                          | 1.527                                                                   |
| Reference          | Prehled Prumyslove Toxikologie; Organicke Latky; Marhold; J. pp 1065;86 | 28ZPAK-;194;72                                                                 | Prehled Prumyslove Toxikologie; Organicke Latky; Marhold; J. - ;1300;86 |

## Model Applicability

Unknown features are fingerprint features in the query molecule, but not found in the training set.

- OPS PC11 out of range. Value: 5.5126. Training min, max, SD, explained variance: -5.8277, 5.3336, 1.291, 0.0203.
- OPS PC18 out of range. Value: -4.5689. Training min, max, SD, explained variance: -4.1571, 3.8727, 1.069, 0.0139.
- Unknown FCFP\_2 feature: 10: [\*][NH2+][\*]
- Unknown FCFP\_2 feature: 18028531: [\*]C([\*])[NH2+]C
- Unknown FCFP\_2 feature: -1817836174: [\*]CC([NH2+][\*])C(=[\*])[\*]
- Unknown FCFP\_2 feature: 136418580: [\*][NH2+]C

## Feature Contribution

### Top features for positive contribution

| Fingerprint | Bit/Smiles | Feature Structure | Score | Moderate_Severe in training set |
|-------------|------------|-------------------|-------|---------------------------------|
|             |            |                   |       |                                 |

| FCFP_10                                | 1985089045  | 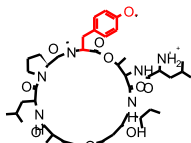<br><chem>[*]O[c]1:[cH]:[cH]:[c](CC([*])([*]):[cH]:[cH]):1</chem> | 0.385  | 16 out of 16                       |
|----------------------------------------|-------------|------------------------------------------------------------------------------------------------------------------------------------------------------|--------|------------------------------------|
| FCFP_10                                | -497728148  | <br><chem>[*]CC[c]1:[cH]:[cH]:[*]:[c]([*]):[cH]:1</chem>          | 0.356  | 24 out of 25                       |
| FCFP_10                                | -1034142694 | <br><chem>[*]C[c]1:[cH]:[cH]:[c](OC):[cH]:[cH]:1</chem>           | 0.338  | 18 out of 19                       |
| Top Features for negative contribution |             |                                                                                                                                                      |        |                                    |
| Fingerprint                            | Bit/Smiles  | Feature Structure                                                                                                                                    | Score  | Moderate_Severe<br>in training set |
| FCFP_10                                | -1977641857 | <br><chem>[*][c]([*]):[c](OC):[cH]:[*]</chem>                    | -0.780 | 4 out of 15                        |
| FCFP_10                                | -428284881  | <br><chem>[*]C([*])C(OC(=O)C=[*])C([*])[*]</chem>               | -0.580 | 4 out of 12                        |

|         |            |                                                                                                                                            |        |            |
|---------|------------|--------------------------------------------------------------------------------------------------------------------------------------------|--------|------------|
| FCFP_10 | -551279842 | 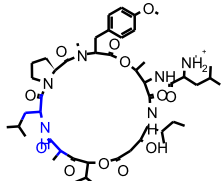 <p> <chem>[*]CC(NC(=O)C([*])[*])C(=[*])[*]</chem> </p> | -0.507 | 0 out of 1 |
|---------|------------|--------------------------------------------------------------------------------------------------------------------------------------------|--------|------------|

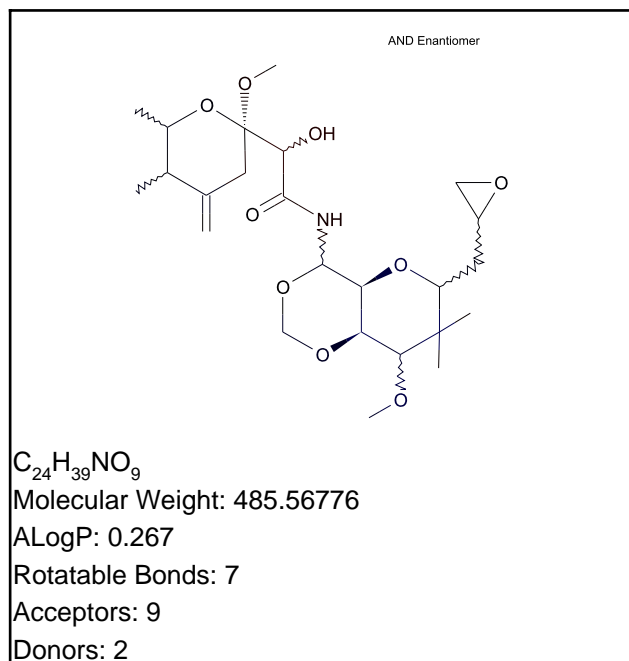

## Model Prediction

Prediction: Mild

Probability: 0.807

Enrichment: 1.171

Bayesian Score: -0.741

Mahalanobis Distance: 14.994

Mahalanobis Distance p-value: 1.61e-013

Prediction: Positive if the Bayesian score is above the estimated best cutoff value from minimizing the false positive and false negative rate.

Probability: The estimated probability that the sample is in the positive category. This assumes that the Bayesian score follows a normal distribution and is different from the prediction using a cutoff.

Enrichment: An estimate of enrichment, that is, the increased likelihood (versus random) of this sample being in the category.

Bayesian Score: The standard Laplacian-modified Bayesian score.

Mahalanobis Distance: The Mahalanobis distance (MD) is the distance to the center of the training data. The larger the MD, the less trustworthy the prediction.

Mahalanobis Distance p-value: The p-value gives the fraction of training data with an MD greater than or equal to the one for the given sample, assuming normally distributed data. The smaller the p-value, the less trustworthy the prediction. For highly non-normal X properties (e.g., fingerprints), the MD p-value is wildly inaccurate.

## Structural Similar Compounds

| Name               | Fumaric acid; bis(3-allyloxy-2-hydroxypropyl) ester                                 | COLCHICINE                                                                          | 2H-Naphtho(1;2-d)triazole-6;8-disulfonic acid;                                      |
|--------------------|-------------------------------------------------------------------------------------|-------------------------------------------------------------------------------------|-------------------------------------------------------------------------------------|
| Structure          | 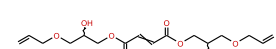 |  |  |
| Actual Endpoint    | Moderate_Severe                                                                     | Moderate_Severe                                                                     | Mild                                                                                |
| Predicted Endpoint | Moderate_Severe                                                                     | Moderate_Severe                                                                     | Mild                                                                                |
| Distance           | 0.841                                                                               | 0.876                                                                               | 0.883                                                                               |
| Reference          | Prehled Prumyslove Toxikologie; Organicke Latky; Marhold; J. -;646;86               | AJOPAA 31;837;48                                                                    | Prehled Prumyslove Toxikologie; Organicke Latky; Marhold; J. pp 1065;86             |

## Model Applicability

Unknown features are fingerprint features in the query molecule, but not found in the training set.

- All properties and OPS components are within expected ranges.

## Feature Contribution

### Top features for positive contribution

| Fingerprint | Bit/Smiles | Feature Structure                                                                                        | Score | Moderate_Severe in training set |
|-------------|------------|----------------------------------------------------------------------------------------------------------|-------|---------------------------------|
| FCFP_10     | 1657756157 | 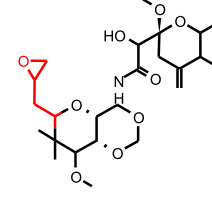<br>[*]C([*])CC1CO1 | 0.294 | 3 out of 3                      |

|                                        |            |                                                                                                                                                   |        |                                    |
|----------------------------------------|------------|---------------------------------------------------------------------------------------------------------------------------------------------------|--------|------------------------------------|
| FCFP_10                                | -885550502 | 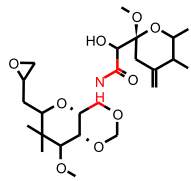<br><chem>[*]C([*])NC(=O)[*]</chem>                            | 0.239  | 54 out of 64                       |
| FCFP_10                                | 1070061035 | <br><chem>[*]C([*])O</chem>                                    | 0.239  | 284 out of 338                     |
| Top Features for negative contribution |            |                                                                                                                                                   |        |                                    |
| Fingerprint                            | Bit/Smiles | Feature Structure                                                                                                                                 | Score  | Moderate_Severe<br>in training set |
| FCFP_10                                | 1132363037 | <br><chem>[*]OC1C([*])[*]C([*])<br/>C(O[*])C1OC([*])[*]</chem> | -0.507 | 0 out of 1                         |
| FCFP_10                                | 638583477  | <br><chem>[*]C1([*])[*]C(=O)[*]C<br/>(C)C(C)O1</chem>         | -0.507 | 0 out of 1                         |
| FCFP_10                                | -987676025 | <br><chem>[*]OC(CC1CO1)C([*])([<br/>*])[*]</chem>            | -0.507 | 0 out of 1                         |

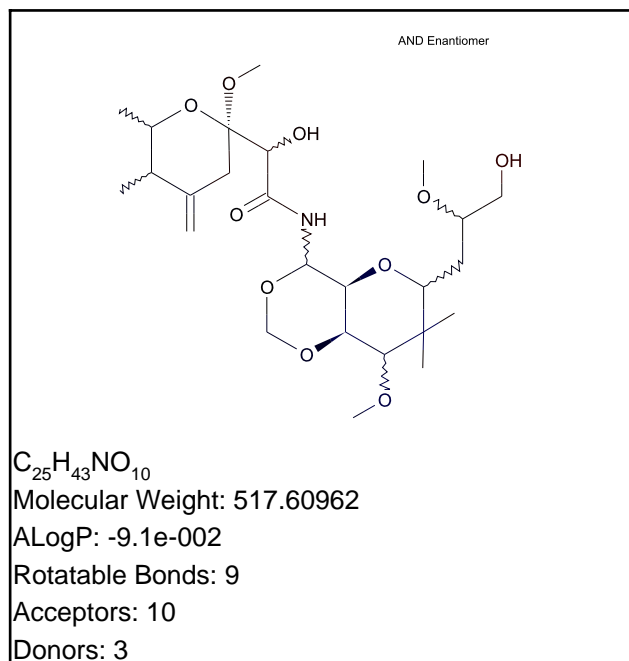

## Model Prediction

Prediction: Mild

Probability: 0.809

Enrichment: 1.174

Bayesian Score: -0.646

Mahalanobis Distance: 14.434

Mahalanobis Distance p-value: 1.34e-011

Prediction: Positive if the Bayesian score is above the estimated best cutoff value from minimizing the false positive and false negative rate.

Probability: The estimated probability that the sample is in the positive category. This assumes that the Bayesian score follows a normal distribution and is different from the prediction using a cutoff.

Enrichment: An estimate of enrichment, that is, the increased likelihood (versus random) of this sample being in the category.

Bayesian Score: The standard Laplacian-modified Bayesian score.

Mahalanobis Distance: The Mahalanobis distance (MD) is the distance to the center of the training data. The larger the MD, the less trustworthy the prediction.

Mahalanobis Distance p-value: The p-value gives the fraction of training data with an MD greater than or equal to the one for the given sample, assuming normally distributed data. The smaller the p-value, the less trustworthy the prediction. For highly non-normal X properties (e.g., fingerprints), the MD p-value is wildly inaccurate.

## Structural Similar Compounds

| Name               | Fumaric acid; bis(3-allyloxy-2-hydroxypropyl) ester                                 | 2:7-NAPHTHALENE DISULFONIC ACID;4-AMINO-5-HYDROXY-;P-TOLUENE SULFONATE (ESTER)      | 2:7-Naphthalenedisulfonic acid;                                                     |
|--------------------|-------------------------------------------------------------------------------------|-------------------------------------------------------------------------------------|-------------------------------------------------------------------------------------|
| Structure          | 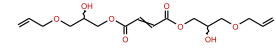 |  |  |
| Actual Endpoint    | Moderate_Severe                                                                     | Moderate_Severe                                                                     | Moderate_Severe                                                                     |
| Predicted Endpoint | Moderate_Severe                                                                     | Moderate_Severe                                                                     | Moderate_Severe                                                                     |
| Distance           | 0.942                                                                               | 0.943                                                                               | 0.994                                                                               |
| Reference          | Prehled Prumyslove Toxikologie; Organicke Latky; Marhold; J. -;646;86               | 28ZPAK-;194;72                                                                      | Prehled Prumyslove Toxikologie; Organicke Latky; Marhold; J. -;1300;86              |

## Model Applicability

Unknown features are fingerprint features in the query molecule, but not found in the training set.

1. All properties and OPS components are within expected ranges.

## Feature Contribution

### Top features for positive contribution

| Fingerprint | Bit/Smiles  | Feature Structure                                                                                         | Score | Moderate_Severe in training set |
|-------------|-------------|-----------------------------------------------------------------------------------------------------------|-------|---------------------------------|
| FCFP_10     | -1272709286 | 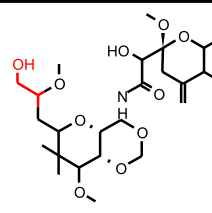<br>[*]C([*])([*])CO | 0.285 | 234 out of 266                  |



|                                        |            |                                                                                                                                                     |        |                                    |
|----------------------------------------|------------|-----------------------------------------------------------------------------------------------------------------------------------------------------|--------|------------------------------------|
| FCFP_10                                | -885550502 | 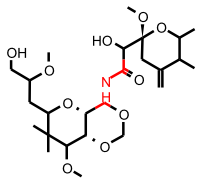<br><chem>[*]C([*])NC(=[*])[*]</chem>                            | 0.239  | 54 out of 64                       |
| FCFP_10                                | 1070061035 | <br><chem>[*]C([*])O</chem>                                      | 0.239  | 284 out of 338                     |
| Top Features for negative contribution |            |                                                                                                                                                     |        |                                    |
| Fingerprint                            | Bit/Smiles | Feature Structure                                                                                                                                   | Score  | Moderate_Severe<br>in training set |
| FCFP_10                                | 638583477  | <br><chem>[*]C1([*])[*]C(=[*])C<br/>(C)C(C)O1</chem>             | -0.507 | 0 out of 1                         |
| FCFP_10                                | -987676025 | <br><chem>[*]OC(CC1CO1)C([*])([<br/>*])[*]</chem>               | -0.507 | 0 out of 1                         |
| FCFP_10                                | 1132363037 | <br><chem>[*]OC1C([*])[*]C([*])<br/>C(O[*])C1OC([*])[*]</chem> | -0.507 | 0 out of 1                         |

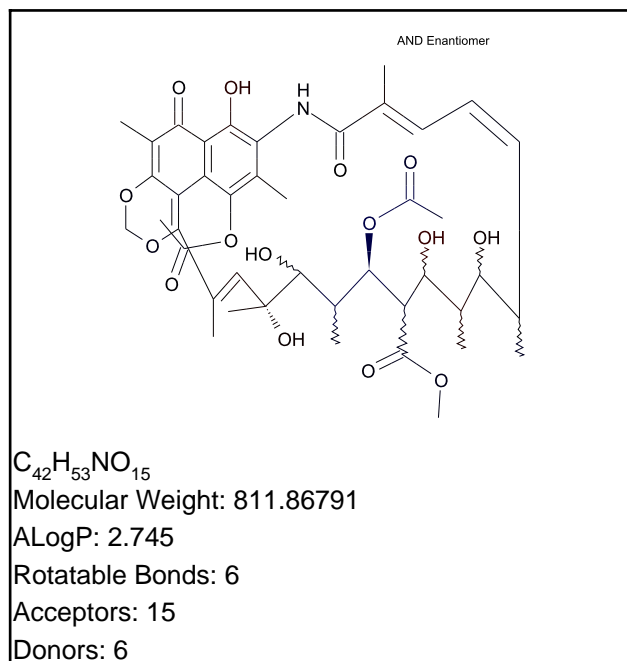

## Model Prediction

Prediction: Mild

Probability: 0.796

Enrichment: 1.155

Bayesian Score: -1.163

Mahalanobis Distance: 18.715

Mahalanobis Distance p-value: 3.08e-029

Prediction: Positive if the Bayesian score is above the estimated best cutoff value from minimizing the false positive and false negative rate.

Probability: The estimated probability that the sample is in the positive category. This assumes that the Bayesian score follows a normal distribution and is different from the prediction using a cutoff.

Enrichment: An estimate of enrichment, that is, the increased likelihood (versus random) of this sample being in the category.

Bayesian Score: The standard Laplacian-modified Bayesian score.

Mahalanobis Distance: The Mahalanobis distance (MD) is the distance to the center of the training data. The larger the MD, the less trustworthy the prediction.

Mahalanobis Distance p-value: The p-value gives the fraction of training data with an MD greater than or equal to the one for the given sample, assuming normally distributed data. The smaller the p-value, the less trustworthy the prediction. For highly non-normal X properties (e.g., fingerprints), the MD p-value is wildly inaccurate.

## Structural Similar Compounds

| Name               | 2-Naphthalenesulfonic acid; 5;6'-iminobis(1-hydroxy-                                | 2:7-NAPHTHALENE DISULFONIC ACID;4-AMINO-5-HYDROXY-;P-TOLUENE SULFONATE (ESTER)      | Methanol; (s-triazine-2;4;6-triyltrinitrilo)hexa-                                   |
|--------------------|-------------------------------------------------------------------------------------|-------------------------------------------------------------------------------------|-------------------------------------------------------------------------------------|
| Structure          | 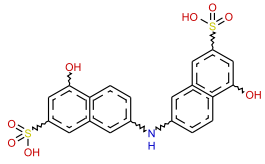 |  |  |
| Actual Endpoint    | Mild                                                                                | Moderate_Severe                                                                     | Moderate_Severe                                                                     |
| Predicted Endpoint | Mild                                                                                | Moderate_Severe                                                                     | Moderate_Severe                                                                     |
| Distance           | 1.359                                                                               | 1.530                                                                               | 1.538                                                                               |
| Reference          | Prehled Prumyslove Toxikologie; Organicke Latky; Marhold; J. pp 1065;86             | 28ZPAK-;194;72                                                                      | Prehled Prumyslove Toxikologie; Organicke Latky; Marhold; J. -;876;86               |

## Model Applicability

Unknown features are fingerprint features in the query molecule, but not found in the training set.

- OPS PC20 out of range. Value: -3.8503. Training min, max, SD, explained variance: -3.1294, 4.2413, 1.03, 0.0129.

## Feature Contribution

| Top features for positive contribution |            |                                                                                                                   |       |                                 |
|----------------------------------------|------------|-------------------------------------------------------------------------------------------------------------------|-------|---------------------------------|
| Fingerprint                            | Bit/Smiles | Feature Structure                                                                                                 | Score | Moderate_Severe in training set |
| FCFP_10                                | -525166915 | 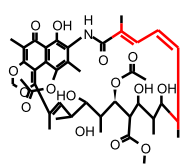<br>[*]C([*])C=C/C=C([*])[*] | 0.317 | 4 out of 4                      |

|                                        |             |                                                                                                                                                                       |        |                                    |
|----------------------------------------|-------------|-----------------------------------------------------------------------------------------------------------------------------------------------------------------------|--------|------------------------------------|
| FCFP_10                                | -1922181751 | 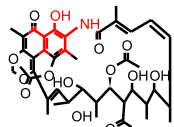<br><chem>[*]N[c]1:[c]([*]):[*]<br/>:[c]([*]):[c](C=[*]<br/>)[*]):[c]:1O</chem>    | 0.256  | 2 out of 2                         |
| FCFP_10                                | 56921271    | <br><chem>[*]C([*])C(O)C(C)C(O)<br/>C([*])[*]</chem>                               | 0.256  | 2 out of 2                         |
| Top Features for negative contribution |             |                                                                                                                                                                       |        |                                    |
| Fingerprint                            | Bit/Smiles  | Feature Structure                                                                                                                                                     | Score  | Moderate_Severe<br>in training set |
| FCFP_10                                | -528918648  | <br><chem>[*]C([*])C(C)C=C/C=[<br/>*]</chem>                                       | -0.651 | 4 out of 13                        |
| FCFP_10                                | -428284881  | <br><chem>[*]C([*])C(OC(=O)C=[*]<br/>)C([*])[*]</chem>                            | -0.580 | 4 out of 12                        |
| FCFP_10                                | -2052862541 | <br><chem>[*]C([*])C(C)C@@H)(O<br/>C(=[*])[*])C(C([*])<br/>[*])C(=[*])[*]</chem> | -0.507 | 0 out of 1                         |

# Simeprevir

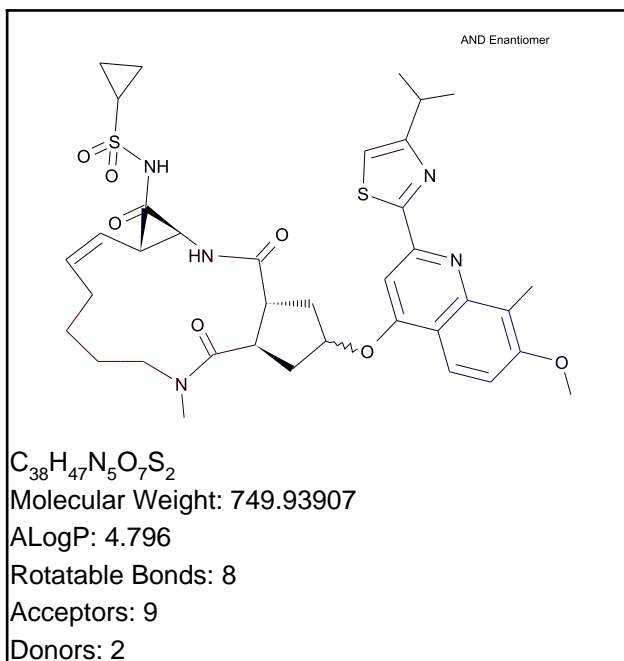

## Model Prediction

Prediction: Mild

Probability: 0.777

Enrichment: 1.128

Bayesian Score: -1.771

Mahalanobis Distance: 17.078

Mahalanobis Distance p-value: 9.74e-022

Prediction: Positive if the Bayesian score is above the estimated best cutoff value from minimizing the false positive and false negative rate.

Probability: The estimated probability that the sample is in the positive category. This assumes that the Bayesian score follows a normal distribution and is different from the prediction using a cutoff.

Enrichment: An estimate of enrichment, that is, the increased likelihood (versus random) of this sample being in the category.  
Bayesian Score: The standard Laplacian-modified Bayesian score.

**Mahalanobis Distance:** The Mahalanobis distance (MD) is the distance to the center of the training data. The larger the MD, the less trustworthy the prediction.

Mahalanobis Distance p-value: The p-value gives the fraction of training data with an MD greater than or equal to the one for the given sample, assuming normally distributed data. The smaller the p-value, the less trustworthy the prediction. For highly non-normal X properties (e.g., fingerprints), the MD p-value is wildly inaccurate.

## TOPKAT\_Ocular\_Irritancy\_Mild\_vs\_Moderate\_Severe

## Structural Similar Compounds

| Name               | Anthraquinone; 1;1'-<br>(anthraquinon-1;5-<br>ylenediimino)di-                      | Anthraquinone; 1;1'-<br>(anthraquinon-1;4-<br>ylenediimino)di-                      | 4;4'-DIAMINO-1;1'-<br>DIANTHRIMIDE                                                  |
|--------------------|-------------------------------------------------------------------------------------|-------------------------------------------------------------------------------------|-------------------------------------------------------------------------------------|
| Structure          | 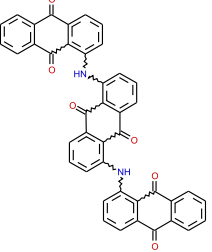 |  |  |
| Actual Endpoint    | Mild                                                                                | Mild                                                                                | Mild                                                                                |
| Predicted Endpoint | Mild                                                                                | Mild                                                                                | Mild                                                                                |
| Distance           | 0.875                                                                               | 0.875                                                                               | 1.102                                                                               |
| Reference          | Prehled Prumyslove<br>Toxikologie; Organicke<br>Latky; Marhold; J. pp<br>736:86     | Prehled Prumyslove<br>Toxikologie; Organicke<br>Latky; Marhold; J. pp<br>736:86     | 28ZPAK-;125;72                                                                      |

## Model Applicability

Unknown features are fingerprint features in the query molecule, but not found in the training set.

1. OPS PC15 out of range. Value: 5.5676. Training min, max, SD, explained variance: -4.4071, 5.1624, 1.138, 0.0158.

## Feature Contribution

### Top features for positive contribution

| Fingerprint | Bit/Smiles  | Feature Structure                                                                                                            | Score | Moderate_Severe<br>in training set |
|-------------|-------------|------------------------------------------------------------------------------------------------------------------------------|-------|------------------------------------|
| FCFP_10     | -2015019763 | 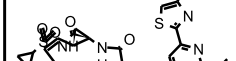<br><chem>[*]CCN(C)C(=O)C([*])C1</chem> | 0.294 | 3 out of 3                         |

[\*]CCN(C)C(=O)C([\*])[\*]

|                                        |             |                                                                                                                                       |        |                                 |
|----------------------------------------|-------------|---------------------------------------------------------------------------------------------------------------------------------------|--------|---------------------------------|
| FCFP_10                                | -124655670  | 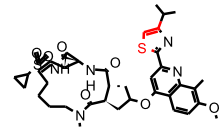<br><chem>[*][c]1:[*]:[*]:s:[cH]:1</chem>          | 0.259  | 14 out of 16                    |
| FCFP_10                                | -1474971978 | <br><chem>[*][C@@H]1CCCN1C(=[*])[*]</chem>         | 0.259  | 14 out of 16                    |
| Top Features for negative contribution |             |                                                                                                                                       |        |                                 |
| Fingerprint                            | Bit/Smiles  | Feature Structure                                                                                                                     | Score  | Moderate_Severe in training set |
| FCFP_10                                | -1977641857 | <br><chem>[*][c](:[*]):[c](OC):[cH]:[*]</chem>     | -0.780 | 4 out of 15                     |
| FCFP_10                                | -528918648  | <br><chem>[*]C([*])C(C)C=C/C=[*]</chem>           | -0.651 | 4 out of 13                     |
| FCFP_10                                | 690481386   | <br><chem>[*]:[c](:[*])[c]1:n:[*]:[*]:s:1</chem> | -0.600 | 1 out of 4                      |

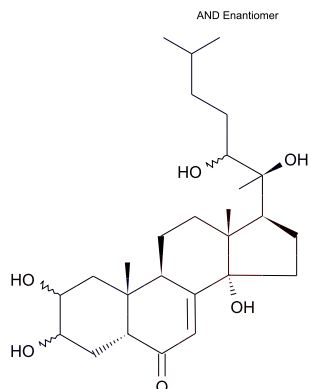
$$\text{C}_{27}\text{H}_{44}\text{O}_6$$

Molecular Weight: 464.63466

|ALogP: 2.489

Rotatable Bonds: 5

Acceptors: 6

Donors: 5

## Model Prediction

Prediction: Moderate

Probability: 0.664

Enrichment: 1.071

Bayesian Score: -0.774

Mahalanobis Distance: 14.969

Mahalanobis Distance p-value: 6.15e-014

Prediction: Positive if the Bayesian score is above the estimated best cutoff value from minimizing the false positive and false negative rate.

**Probability:** The estimated probability that the sample is in the positive category. This assumes that the Bayesian score follows a normal distribution and is different from the prediction using a cutoff.

Enrichment: An estimate of enrichment, that is, the increased likelihood (versus random) of this sample being in the category.  
Bayesian Score: The standard Laplacian-modified Bayesian score.

**Mahalanobis Distance:** The Mahalanobis distance (MD) is the distance to the center of the training data. The larger the MD, the less trustworthy the prediction.

Mahalanobis Distance p-value: The p-value gives the fraction of training data with an MD greater than or equal to the one for the given sample, assuming normally distributed data. The smaller the p-value, the less trustworthy the prediction. For highly non-normal X properties (e.g., fingerprints), the MD p-value is wildly inaccurate.

## Structural Similar Compounds

| Name               | SULFIDE;<br>BIS(DIHYDROXYPHENYL)                                                    | ANTHRACENE-9;10-DIOL;1;4-DIAMINO-                                                   | ANTHRAQUINONE;1;5-DIAMINO-4;8-DIHYDROXY-                                            |
|--------------------|-------------------------------------------------------------------------------------|-------------------------------------------------------------------------------------|-------------------------------------------------------------------------------------|
| Structure          | 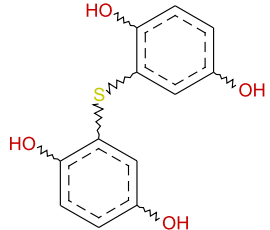 |  |  |
| Actual Endpoint    | Severe                                                                              | Moderate                                                                            | Moderate                                                                            |
| Predicted Endpoint | Severe                                                                              | Moderate                                                                            | Moderate                                                                            |
| Distance           | 1.045                                                                               | 1.058                                                                               | 1.085                                                                               |
| Reference          | IHFCA Y 6;1;67                                                                      | 28ZPAK-;112;72                                                                      | 28ZPAK-;103;72                                                                      |

## Model Applicability

Unknown features are fingerprint features in the query molecule, but not found in the training set.

1. All properties and OPS components are within expected ranges.

## Feature Contribution

### Top features for positive contribution

| Fingerprint | Bit/Smiles  | Feature Structure                                                                                                                               | Score | Severe in training set |
|-------------|-------------|-------------------------------------------------------------------------------------------------------------------------------------------------|-------|------------------------|
| SCFP_12     | -1742546106 | 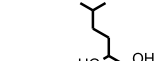<br><chem>[*]C@@H1[*]C@2([*])[*]C@H1([*])C@@2(C)CC1</chem> | 0.348 | 3 out of 3             |

|                                        |             |                                                                                                                                               |        |                        |
|----------------------------------------|-------------|-----------------------------------------------------------------------------------------------------------------------------------------------|--------|------------------------|
| SCFP_12                                | -415245925  | 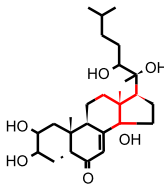<br><chem>[*]C[C@]1(C)[C@@H]([*])[*]C1([*])[*]</chem>       | 0.312  | 12 out of 14           |
| SCFP_12                                | 571795252   | <br><chem>[*]C([*])C(=O)C=[*]</chem>                       | 0.303  | 2 out of 2             |
| Top Features for negative contribution |             |                                                                                                                                               |        |                        |
| Fingerprint                            | Bit/Smiles  | Feature Structure                                                                                                                             | Score  | Severe in training set |
| SCFP_12                                | -1870530637 | <br><chem>[*]CCC(C)C</chem>                                | -0.653 | 3 out of 11            |
| SCFP_12                                | -1903488337 | <br><chem>[*]C1[*]C([*])([*])C@@H](CC1O)C(=[*])[*]</chem> | -0.475 | 0 out of 1             |
| SCFP_12                                | 1416196903  | <br><chem>[*]C([*])C(C)(O)C([*])[*]</chem>               | -0.383 | 3 out of 8             |

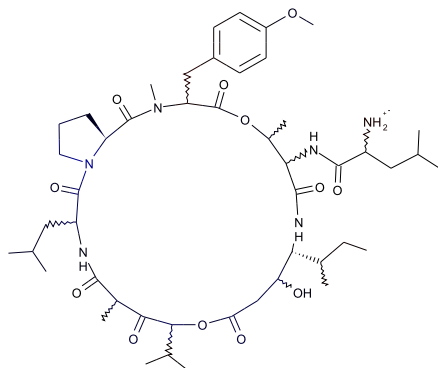

$C_{49}H_{79}N_6O_{12}$

Molecular Weight: 944.18455

ALogP: 3.176

Rotatable Bonds: 13

Acceptors: 12

Donors: 5

## Model Prediction

Prediction: Moderate

Probability: 0.325

Enrichment: 0.524

Bayesian Score: -6.874

Mahalanobis Distance: 22.527

Mahalanobis Distance p-value: 5.24e-047

Prediction: Positive if the Bayesian score is above the estimated best cutoff value from minimizing the false positive and false negative rate.

Probability: The estimated probability that the sample is in the positive category. This assumes that the Bayesian score follows a normal distribution and is different from the prediction using a cutoff.

Enrichment: An estimate of enrichment, that is, the increased likelihood (versus random) of this sample being in the category.

Bayesian Score: The standard Laplacian-modified Bayesian score.

Mahalanobis Distance: The Mahalanobis distance (MD) is the distance to the center of the training data. The larger the MD, the less trustworthy the prediction.

Mahalanobis Distance p-value: The p-value gives the fraction of training data with an MD greater than or equal to the one for the given sample, assuming normally distributed data. The smaller the p-value, the less trustworthy the prediction. For highly non-normal X properties (e.g., fingerprints), the MD p-value is wildly inaccurate.

## Structural Similar Compounds

| Name               | 2;7-NAPHTHALENE DISULFONIC ACID;4-AMINO-5-HYDROXY-;P-TOLUENE SULFONATE (ESTER) | 2;7-Naphthalenedisulfonic acid;                                         | Nonoxynol-10                       |
|--------------------|--------------------------------------------------------------------------------|-------------------------------------------------------------------------|------------------------------------|
| Structure          |                                                                                |                                                                         |                                    |
| Actual Endpoint    | Moderate                                                                       | Moderate                                                                | Severe                             |
| Predicted Endpoint | Moderate                                                                       | Moderate                                                                | Severe                             |
| Distance           | 1.539                                                                          | 1.555                                                                   | 1.717                              |
| Reference          | 28ZPAK-;194;72                                                                 | Prehled Prumyslove Toxikologie; Organické Latky; Marhold; J. - ;1300;86 | J. Am. Coll. Toxicol. 2(7):35;1983 |

## Model Applicability

Unknown features are fingerprint features in the query molecule, but not found in the training set.

1. Molecular\_Weight out of range. Value: 944.18. Training min, max, mean, SD: 30.026, 925.19, 182.4, 118.7.
2. OPS PC13 out of range. Value: 3.858. Training min, max, SD, explained variance: -4.8039, 3.7347, 1.133, 0.0169.
3. OPS PC17 out of range. Value: -3.6159. Training min, max, SD, explained variance: -3.5376, 3.4565, 1.013, 0.0135.

## Feature Contribution

### Top features for positive contribution

| Fingerprint | Bit/Smiles | Feature Structure | Score | Severe in training set |
|-------------|------------|-------------------|-------|------------------------|
|-------------|------------|-------------------|-------|------------------------|



|                                        |             |                                                                                                                                      |        |                        |
|----------------------------------------|-------------|--------------------------------------------------------------------------------------------------------------------------------------|--------|------------------------|
| SCFP_12                                | -1580903393 | 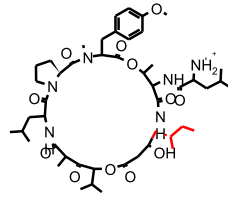<br><chem>[*]C([*])C(C)CC</chem>                  | 0.268  | 17 out of 21           |
| SCFP_12                                | -1272709286 | <br><chem>[*]C([*])C[c]([*]):[<br/>*]</chem>      | 0.231  | 24 out of 31           |
| SCFP_12                                | 136448371   | <br><chem>[*][NH2+]C</chem>                       | 0.218  | 1 out of 1             |
| Top Features for negative contribution |             |                                                                                                                                      |        |                        |
| Fingerprint                            | Bit/Smiles  | Feature Structure                                                                                                                    | Score  | Severe in training set |
| SCFP_12                                | 571765461   | <br><chem>[*]C([*])C(=O)C([*])[<br/>*]</chem>    | -1.017 | 2 out of 12            |
| SCFP_12                                | -1109046624 | <br><chem>[*]C([*])CC(=O)OC([*])<br/>[*]</chem> | -0.769 | 2 out of 9             |

|         |             |                                                                                                                                                                                                                                                                                                                                              |        |             |
|---------|-------------|----------------------------------------------------------------------------------------------------------------------------------------------------------------------------------------------------------------------------------------------------------------------------------------------------------------------------------------------|--------|-------------|
| SCFP_12 | -1343150366 | 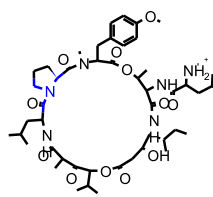 <p>Chemical structure of a macrocyclic peptide. The structure features a large ring with several amide bonds. A blue nitrogen atom is highlighted in the ring. A phenyl group is attached to the ring. The structure is shown in a 2D representation.</p> | -0.667 | 7 out of 24 |
|---------|-------------|----------------------------------------------------------------------------------------------------------------------------------------------------------------------------------------------------------------------------------------------------------------------------------------------------------------------------------------------|--------|-------------|

["][C@@H]1["][\*]CN1C(  
=["])["]

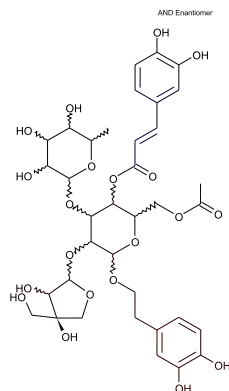
 $C_{36}H_{46}O_{20}$ 

Molecular Weight: 798.73843

ALogP: -0.546

Rotatable Bonds: 16

Acceptors: 20

Donors: 10

## Model Prediction

Prediction: Irritant

Probability: 1.000

Enrichment: 1.175

Bayesian Score: 0.772

Mahalanobis Distance: 22.937

Mahalanobis Distance p-value: 1.22e-053

Prediction: Positive if the Bayesian score is above the estimated best cutoff value from minimizing the false positive and false negative rate.

Probability: The estimated probability that the sample is in the positive category. This assumes that the Bayesian score follows a normal distribution and is different from the prediction using a cutoff.

Enrichment: An estimate of enrichment, that is, the increased likelihood (versus random) of this sample being in the category.

Bayesian Score: The standard Laplacian-modified Bayesian score.

Mahalanobis Distance: The Mahalanobis distance (MD) is the distance to the center of the training data. The larger the MD, the less trustworthy the prediction.

Mahalanobis Distance p-value: The p-value gives the fraction of training data with an MD greater than or equal to the one for the given sample, assuming normally distributed data. The smaller the p-value, the less trustworthy the prediction. For highly non-normal X properties (e.g., fingerprints), the MD p-value is wildly inaccurate.

## Structural Similar Compounds

| Name               | Methanol; (s-triazine-2;4;6-triyltrinitrilo)hexa-                     | 2-Naphthalenesulfonic acid; 5,6'-iminobis(1-hydroxy-                    | 1;3;6-NAPHTHALENE TRISULFONIC ACID;7-AMINO- |
|--------------------|-----------------------------------------------------------------------|-------------------------------------------------------------------------|---------------------------------------------|
| Structure          |                                                                       |                                                                         |                                             |
| Actual Endpoint    | Irritant                                                              | Irritant                                                                | Irritant                                    |
| Predicted Endpoint | Irritant                                                              | Irritant                                                                | Irritant                                    |
| Distance           | 1.918                                                                 | 2.143                                                                   | 2.327                                       |
| Reference          | Prehled Prumyslove Toxikologie; Organicke Latky; Marhold; J. -;876;86 | Prehled Prumyslove Toxikologie; Organicke Latky; Marhold; J. pp 1065;86 | 28ZPAK-;190;72                              |

## Model Applicability

Unknown features are fingerprint features in the query molecule, but not found in the training set.

1. Num\_H\_Donors out of range. Value: 10. Training min, max, mean, SD: 0, 6, 0.68472, 0.8931.
2. OPS PC7 out of range. Value: 9.7097. Training min, max, SD, explained variance: -6.07, 6.0201, 1.57, 0.0301.

## Feature Contribution

### Top features for positive contribution

| Fingerprint | Bit/Smiles | Feature Structure                                 | Score | Irritant in training set |
|-------------|------------|---------------------------------------------------|-------|--------------------------|
| FCFP_12     | -415156552 | <br>AND Enantiomer<br>[*]C[C@@]1(O)C[*]1C<br>1[*] | 0.184 | 7 out of 7               |

| FCFP_12                                | -204034463  | <p>AND Enantiomer</p> 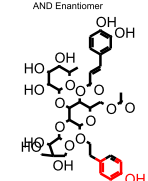 <p>[*][c]1:[*]:[cH]:[c](O):[c](O):[cH]:1</p>        | 0.175  | 5 out of 5               |
|----------------------------------------|-------------|---------------------------------------------------------------------------------------------------------------------------------------------------------------|--------|--------------------------|
| FCFP_12                                | 750347608   | <p>AND Enantiomer</p>  <p>[*]C([*])C(OC1O[*])[*]<br/>C1[*])C([*])[*]</p>   | 0.156  | 3 out of 3               |
| Top Features for negative contribution |             |                                                                                                                                                               |        |                          |
| Fingerprint                            | Bit/Smiles  | Feature Structure                                                                                                                                             | Score  | Irritant in training set |
| FCFP_12                                | -1078052987 | <p>AND Enantiomer</p>  <p>[*]C=C[c]1:[cH]:[cH]1<br/>[*][c]([*]):[cH]:1</p> | -0.344 | 2 out of 4               |
| FCFP_12                                | -146015125  | <p>AND Enantiomer</p>  <p>[*]C([*])C=C[c]([*])<br/>[cH]:[*]:[cH]:[*]</p>  | -0.268 | 1 out of 2               |
| FCFP_12                                | -432846198  | <p>AND Enantiomer</p>  <p>[*]C([*])COC(=O)C</p>                          | -0.229 | 91 out of 142            |

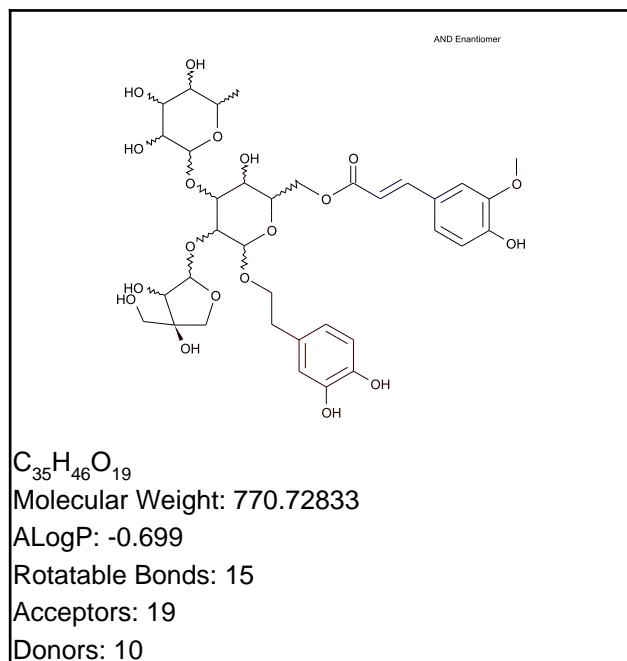

## Model Prediction

Prediction: Irritant

Probability: 1.000

Enrichment: 1.175

Bayesian Score: 1.187

Mahalanobis Distance: 21.625

Mahalanobis Distance p-value: 8.39e-046

Prediction: Positive if the Bayesian score is above the estimated best cutoff value from minimizing the false positive and false negative rate.

Probability: The estimated probability that the sample is in the positive category. This assumes that the Bayesian score follows a normal distribution and is different from the prediction using a cutoff.

Enrichment: An estimate of enrichment, that is, the increased likelihood (versus random) of this sample being in the category.

Bayesian Score: The standard Laplacian-modified Bayesian score.

Mahalanobis Distance: The Mahalanobis distance (MD) is the distance to the center of the training data. The larger the MD, the less trustworthy the prediction.

Mahalanobis Distance p-value: The p-value gives the fraction of training data with an MD greater than or equal to the one for the given sample, assuming normally distributed data. The smaller the p-value, the less trustworthy the prediction. For highly non-normal X properties (e.g., fingerprints), the MD p-value is wildly inaccurate.

## Structural Similar Compounds

| Name               | Methanol; (s-triazine-2;4;6-triyltrinitrilo)hexa-                                   | 2-Naphthalenesulfonic acid; 5,6'-iminobis(1-hydroxy-                                | 1;3;6-NAPHTHALENE TRISULFONIC ACID;7-AMINO-                                         |
|--------------------|-------------------------------------------------------------------------------------|-------------------------------------------------------------------------------------|-------------------------------------------------------------------------------------|
| Structure          | 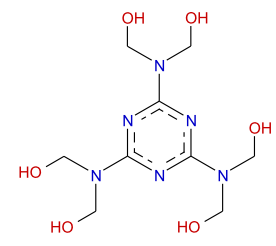 |  |  |
| Actual Endpoint    | Irritant                                                                            | Irritant                                                                            | Irritant                                                                            |
| Predicted Endpoint | Irritant                                                                            | Irritant                                                                            | Irritant                                                                            |
| Distance           | 1.848                                                                               | 2.078                                                                               | 2.269                                                                               |
| Reference          | Prehled Prumyslove Toxikologie; Organicke Latky; Marhold; J. -;876;86               | Prehled Prumyslove Toxikologie; Organicke Latky; Marhold; J. pp 1065;86             | 28ZPAK-;190;72                                                                      |

## Model Applicability

Unknown features are fingerprint features in the query molecule, but not found in the training set.

1. Num\_H\_Donors out of range. Value: 10. Training min, max, mean, SD: 0, 6, 0.68472, 0.8931.
2. OPS PC7 out of range. Value: 9.2397. Training min, max, SD, explained variance: -6.07, 6.0201, 1.57, 0.0301.
3. OPS PC15 out of range. Value: 5.2325. Training min, max, SD, explained variance: -4.342, 4.1881, 1.08, 0.0142.

## Feature Contribution

### Top features for positive contribution

| Fingerprint | Bit/Smiles | Feature Structure | Score | Irritant in training set |
|-------------|------------|-------------------|-------|--------------------------|
|             |            |                   |       |                          |

|                                        |             |                                                                                                                                                    |        |                          |
|----------------------------------------|-------------|----------------------------------------------------------------------------------------------------------------------------------------------------|--------|--------------------------|
| FCFP_12                                | -415156552  | 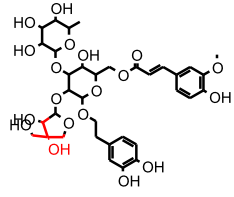<br><chem>[*]C(C@@)1(O)C[*]"[*]C1[*]</chem>                     | 0.184  | 7 out of 7               |
| FCFP_12                                | -204034463  | <br><chem>[*][c]1:[*]:[cH]:[c](O):[c](O):[cH]:1</chem>          | 0.175  | 5 out of 5               |
| FCFP_12                                | 750347608   | <br><chem>[*]C([*])C(OC1O[*]"[*]C1[*])C([*])[*]</chem>          | 0.156  | 3 out of 3               |
| Top Features for negative contribution |             |                                                                                                                                                    |        |                          |
| Fingerprint                            | Bit/Smiles  | Feature Structure                                                                                                                                  | Score  | Irritant in training set |
| FCFP_12                                | -1078052987 | <br><chem>[*]C=C[c]1:[cH]:[cH]:[c]([*]):[cH]:1</chem>          | -0.344 | 2 out of 4               |
| FCFP_12                                | -146015125  | <br><chem>[*]C(=[*])C=C[c]([*]):[cH]:[c]([*]):[cH]:[*]</chem> | -0.268 | 1 out of 2               |

|         |            |                                                                                                                       |        |               |
|---------|------------|-----------------------------------------------------------------------------------------------------------------------|--------|---------------|
| FCFP_12 | -432846198 | 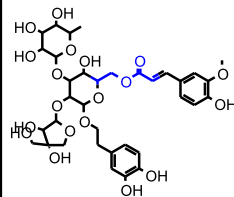<br><chem>[*]C([*])COC(=O)C</chem> | -0.229 | 91 out of 142 |
|---------|------------|-----------------------------------------------------------------------------------------------------------------------|--------|---------------|

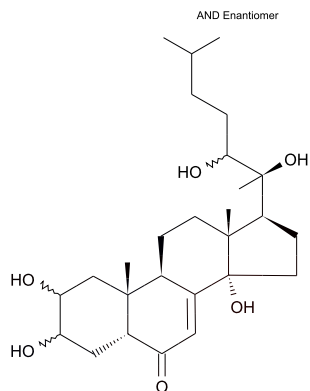
 $C_{27}H_{44}O_6$ 

Molecular Weight: 464.63466

ALogP: 2.489

Rotatable Bonds: 5

Acceptors: 6

Donors: 5

## Model Prediction

**Prediction:** Irritant

Probability: 1.000

Enrichment: 1.175

Bayesian Score: 0.431

Mahalanobis Distance: 13.037

Mahalanobis Distance p-value: 1.63e-007

Prediction: Positive if the Bayesian score is above the estimated best cutoff value from minimizing the false positive and false negative rate.

Probability: The estimated probability that the sample is in the positive category. This assumes that the Bayesian score follows a normal distribution and is different from the prediction using a cutoff.

Enrichment: An estimate of enrichment, that is, the increased likelihood (versus random) of this sample being in the category.

Bayesian Score: The standard Laplacian-modified Bayesian score.

Mahalanobis Distance: The Mahalanobis distance (MD) is the distance to the center of the training data. The larger the MD, the less trustworthy the prediction.

Mahalanobis Distance p-value: The p-value gives the fraction of training data with an MD greater than or equal to the one for the given sample, assuming normally distributed data. The smaller the p-value, the less trustworthy the prediction. For highly non-normal X properties (e.g., fingerprints), the MD p-value is wildly inaccurate.

## Structural Similar Compounds

| Name               | ANTHRAQUINONE; 1;5-DIAMINO-4;8-DIHYDROXY-3-(p-METHOXYPHENYL)- | 2-Naphthalenesulfonic acid; 5;6'-iminobis(1-hydroxy-                    | 4;4'-DIAMINO-1;1'-DIANTHRIMIDE |
|--------------------|---------------------------------------------------------------|-------------------------------------------------------------------------|--------------------------------|
| Structure          |                                                               |                                                                         |                                |
| Actual Endpoint    | Irritant                                                      | Irritant                                                                | Irritant                       |
| Predicted Endpoint | Irritant                                                      | Irritant                                                                | Irritant                       |
| Distance           | 0.843                                                         | 0.897                                                                   | 0.986                          |
| Reference          | 28ZPAK 245;72                                                 | Prehled Prumyslove Toxikologie; Organické Latky; Marhold; J. pp 1065;86 | 28ZPAK-;125;72                 |

## Model Applicability

Unknown features are fingerprint features in the query molecule, but not found in the training set.

1. All properties and OPS components are within expected ranges.

## Feature Contribution

### Top features for positive contribution

| Fingerprint | Bit/Smiles | Feature Structure           | Score | Irritant in training set |
|-------------|------------|-----------------------------|-------|--------------------------|
| FCFP_12     | -415156552 | <br>[*]C[C@@]1(O)C[*]1C1[*] | 0.184 | 7 out of 7               |



|                                        |             |                                                                                                                                                        |        |                          |
|----------------------------------------|-------------|--------------------------------------------------------------------------------------------------------------------------------------------------------|--------|--------------------------|
| FCFP_12                                | 1904223630  | 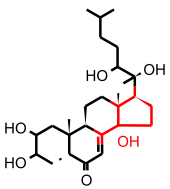<br><chem>[*][C@H]1CC[C@@](O)(C(=O)[*])C1([*])[*]</chem>             | 0.156  | 3 out of 3               |
| FCFP_12                                | 1002543125  | <br><chem>[*][C@@H]1[*][*][C@@H]([*])C(=CC1=O)C([*])([*])[*]</chem> | 0.137  | 2 out of 2               |
| Top Features for negative contribution |             |                                                                                                                                                        |        |                          |
| Fingerprint                            | Bit/Smiles  | Feature Structure                                                                                                                                      | Score  | Irritant in training set |
| FCFP_12                                | -59531427   | <br><chem>[*]C1[*]C([*])([*])[C@@H](CC1O)C(=O)[*]</chem>            | -0.156 | 4 out of 6               |
| FCFP_12                                | -55265897   | <br><chem>[*]C([*])([*])[*][C@H]1CC([*])([*])[*]C1=O</chem>        | -0.114 | 77 out of 107            |
| FCFP_12                                | -1870530637 | <br><chem>[*]CCC(C)C</chem>                                       | -0.070 | 18 out of 24             |

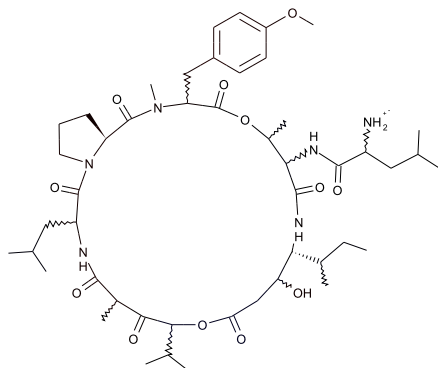
 $C_{49}H_{79}N_6O_{12}$ 

Molecular Weight: 944.18455

ALogP: 3.176

Rotatable Bonds: 13

Acceptors: 12

Donors: 5

## Model Prediction

**Prediction: Irritant**

Probability: 0.976

Enrichment: 1.147

Bayesian Score: 0.320

Mahalanobis Distance: 24.094

Mahalanobis Distance p-value: 7.42e-061

Prediction: Positive if the Bayesian score is above the estimated best cutoff value from minimizing the false positive and false negative rate.

Probability: The estimated probability that the sample is in the positive category. This assumes that the Bayesian score follows a normal distribution and is different from the prediction using a cutoff.

Enrichment: An estimate of enrichment, that is, the increased likelihood (versus random) of this sample being in the category.

Bayesian Score: The standard Laplacian-modified Bayesian score.

Mahalanobis Distance: The Mahalanobis distance (MD) is the distance to the center of the training data. The larger the MD, the less trustworthy the prediction.

Mahalanobis Distance p-value: The p-value gives the fraction of training data with an MD greater than or equal to the one for the given sample, assuming normally distributed data. The smaller the p-value, the less trustworthy the prediction. For highly non-normal X properties (e.g., fingerprints), the MD p-value is wildly inaccurate.

## Structural Similar Compounds

| Name               | 2-Naphthalenesulfonic acid; 5;6'-iminobis(1-hydroxy-                    | 2;7-NAPHTHALENE DISULFONIC ACID;4-AMINO-5-HYDROXY--P-TOLUENE SULFONATE (ESTER) | 2;7-Naphthalenedisulfonic acid;                                         |
|--------------------|-------------------------------------------------------------------------|--------------------------------------------------------------------------------|-------------------------------------------------------------------------|
| Structure          |                                                                         |                                                                                |                                                                         |
| Actual Endpoint    | Irritant                                                                | Irritant                                                                       | Irritant                                                                |
| Predicted Endpoint | Irritant                                                                | Irritant                                                                       | Irritant                                                                |
| Distance           | 1.404                                                                   | 1.491                                                                          | 1.501                                                                   |
| Reference          | Prehled Prumyslove Toxikologie; Organicke Latky; Marhold; J. pp 1065;86 | 28ZPAK-;194;72                                                                 | Prehled Prumyslove Toxikologie; Organicke Latky; Marhold; J. - ;1300;86 |

## Model Applicability

Unknown features are fingerprint features in the query molecule, but not found in the training set.

1. OPS PC15 out of range. Value: 4.7944. Training min, max, SD, explained variance: -4.342, 4.1881, 1.08, 0.0142.
2. Unknown FCFP\_2 feature: 10: [\*][NH2+][\*]
3. Unknown FCFP\_2 feature: 18028531: [\*]C([\*])[NH2+]C
4. Unknown FCFP\_2 feature: -1817836174: [\*]CC([NH2+][\*])C(=[\*])[\*]
5. Unknown FCFP\_2 feature: 136418580: [\*][NH2+]C

## Feature Contribution

| Top features for positive contribution |            |                   |       |                          |
|----------------------------------------|------------|-------------------|-------|--------------------------|
| Fingerprint                            | Bit/Smiles | Feature Structure | Score | Irritant in training set |
|                                        |            |                   |       |                          |

|                                        |             |                                                                                                                                   |        |                          |
|----------------------------------------|-------------|-----------------------------------------------------------------------------------------------------------------------------------|--------|--------------------------|
| FCFP_12                                | -885550502  | 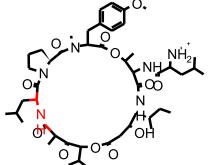<br><chem>[*]C([*])NC(=[*])[*]</chem>          | 0.180  | 64 out of 66             |
| FCFP_12                                | 566058135   | <br><chem>[*]NC(=O)C([*])[*]</chem>            | 0.163  | 23 out of 24             |
| FCFP_12                                | -1553874037 | <br><chem>[*][C@@H]1[*][*]CN1C(=[*])[*]</chem> | 0.163  | 42 out of 44             |
| Top Features for negative contribution |             |                                                                                                                                   |        |                          |
| Fingerprint                            | Bit/Smiles  | Feature Structure                                                                                                                 | Score  | Irritant in training set |
| FCFP_12                                | 1213932708  | <br><chem>[*]C([*])CC(=O)OC([*])[*]</chem>    | -0.671 | 28 out of 69             |
| FCFP_12                                | -1580903393 | <br><chem>[*]C([*])C(C)CC</chem>             | -0.284 | 35 out of 58             |
|                                        |             |                                                                                                                                   |        |                          |

|         |           |                                                                                                                                    |        |              |
|---------|-----------|------------------------------------------------------------------------------------------------------------------------------------|--------|--------------|
| FCFP_12 | 428284881 | 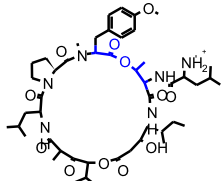<br><chem>*C([*])C(OC(=O)C=[*])C([*])[*]</chem> | -0.229 | 12 out of 19 |
|---------|-----------|------------------------------------------------------------------------------------------------------------------------------------|--------|--------------|

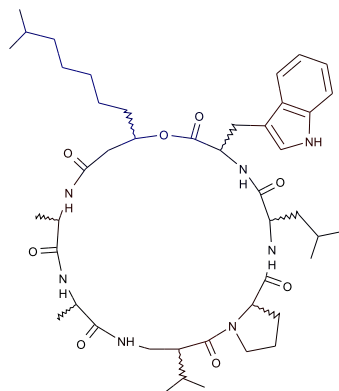

$C_{45}H_{69}N_7O_8$

Molecular Weight: 836.07145

ALogP: 4.986

Rotatable Bonds: 11

Acceptors: 8

Donors: 6

## Model Prediction

Prediction: Non-Irritant

Probability: 0.969

Enrichment: 1.140

Bayesian Score: -1.238

Mahalanobis Distance: 21.131

Mahalanobis Distance p-value: 5.83e-043

Prediction: Positive if the Bayesian score is above the estimated best cutoff value from minimizing the false positive and false negative rate.

Probability: The estimated probability that the sample is in the positive category. This assumes that the Bayesian score follows a normal distribution and is different from the prediction using a cutoff.

Enrichment: An estimate of enrichment, that is, the increased likelihood (versus random) of this sample being in the category.

Bayesian Score: The standard Laplacian-modified Bayesian score.

Mahalanobis Distance: The Mahalanobis distance (MD) is the distance to the center of the training data. The larger the MD, the less trustworthy the prediction.

Mahalanobis Distance p-value: The p-value gives the fraction of training data with an MD greater than or equal to the one for the given sample, assuming normally distributed data. The smaller the p-value, the less trustworthy the prediction. For highly non-normal X properties (e.g., fingerprints), the MD p-value is wildly inaccurate.

## Structural Similar Compounds

| Name               | 2-Naphthalenesulfonic acid; 5,6'-iminobis(1-hydroxy-                    | 4,4'-DIAMINO-1,1'-DIANTHRIMIDE | ANTHRAQUINONE; 1,5-DIAMINO-4,8-DIHYDROXY-3-(p-METHOXYPHENYL)- |
|--------------------|-------------------------------------------------------------------------|--------------------------------|---------------------------------------------------------------|
| Structure          |                                                                         |                                |                                                               |
| Actual Endpoint    | Irritant                                                                | Irritant                       | Irritant                                                      |
| Predicted Endpoint | Irritant                                                                | Irritant                       | Irritant                                                      |
| Distance           | 1.247                                                                   | 1.451                          | 1.454                                                         |
| Reference          | Prehled Prumyslove Toxikologie; Organické Latky; Marhold; J. pp 1065;86 | 28ZPAK-;125;72                 | 28ZPAK 245;72                                                 |

## Model Applicability

Unknown features are fingerprint features in the query molecule, but not found in the training set.

1. All properties and OPS components are within expected ranges.

## Feature Contribution

### Top features for positive contribution

| Fingerprint | Bit/Smiles | Feature Structure                             | Score | Irritant in training set |
|-------------|------------|-----------------------------------------------|-------|--------------------------|
| FCFP_12     | -16162548  | <br>[*]CC(C([*])([*])C(=O)N1C([*])([*])C1[*]) | 0.187 | 8 out of 8               |

| FCFP_12                                | -885550502 | 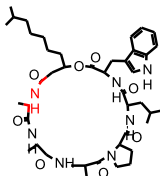<br><chem>[*]C([*])NC(=[*])[*]</chem>                    | 0.180  | 64 out of 66             |
|----------------------------------------|------------|---------------------------------------------------------------------------------------------------------------------------------------------|--------|--------------------------|
| FCFP_12                                | -416918913 | <br><chem>[*]C([*])C(CNC(=[*])[*])C(=[*])[*])</chem>     | 0.175  | 5 out of 5               |
| Top Features for negative contribution |            |                                                                                                                                             |        |                          |
| Fingerprint                            | Bit/Smiles | Feature Structure                                                                                                                           | Score  | Irritant in training set |
| FCFP_12                                | -631749136 | <br><chem>[*]C([*])CCCCC(Cc(=[*])[*])OC(=[*])[*])</chem> | -0.961 | 0 out of 2               |
| FCFP_12                                | 392412010  | <br><chem>[*]CC(N[*])C(=O)OC([*])[*]</chem>             | -0.537 | 1 out of 3               |
| FCFP_12                                | -154166589 | <br><chem>[*]CCCCC(C)C</chem>                          | -0.344 | 2 out of 4               |

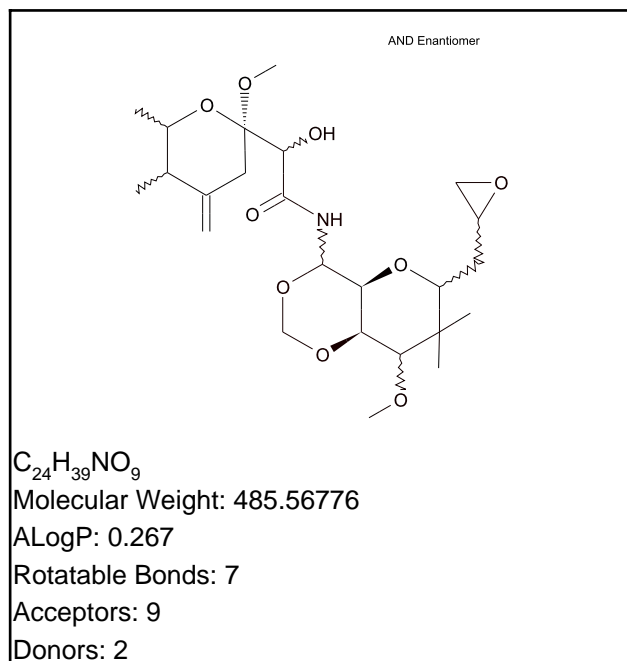

## Model Prediction

Prediction: Irritant

Probability: 1.000

Enrichment: 1.176

Bayesian Score: 1.658

Mahalanobis Distance: 14.637

Mahalanobis Distance p-value: 1.73e-012

Prediction: Positive if the Bayesian score is above the estimated best cutoff value from minimizing the false positive and false negative rate.

Probability: The estimated probability that the sample is in the positive category. This assumes that the Bayesian score follows a normal distribution and is different from the prediction using a cutoff.

Enrichment: An estimate of enrichment, that is, the increased likelihood (versus random) of this sample being in the category.

Bayesian Score: The standard Laplacian-modified Bayesian score.

Mahalanobis Distance: The Mahalanobis distance (MD) is the distance to the center of the training data. The larger the MD, the less trustworthy the prediction.

Mahalanobis Distance p-value: The p-value gives the fraction of training data with an MD greater than or equal to the one for the given sample, assuming normally distributed data. The smaller the p-value, the less trustworthy the prediction. For highly non-normal X properties (e.g., fingerprints), the MD p-value is wildly inaccurate.

## Structural Similar Compounds

| Name               | Fumaric acid; bis(3-allyloxy-2-hydroxypropyl) ester                                 | COLCHICINE                                                                          | 2H-Naphtho(1;2-d)triazole-6;8-disulfonic acid;                                      |
|--------------------|-------------------------------------------------------------------------------------|-------------------------------------------------------------------------------------|-------------------------------------------------------------------------------------|
| Structure          | 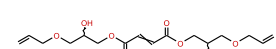 |  |  |
| Actual Endpoint    | Irritant                                                                            | Irritant                                                                            | Irritant                                                                            |
| Predicted Endpoint | Irritant                                                                            | Irritant                                                                            | Irritant                                                                            |
| Distance           | 0.818                                                                               | 0.858                                                                               | 0.879                                                                               |
| Reference          | Prehled Prumyslove Toxikologie; Organicke Latky; Marhold; J. -;646;86               | AJOPAA 31;837;48                                                                    | Prehled Prumyslove Toxikologie; Organicke Latky; Marhold; J. pp 1065;86             |

## Model Applicability

Unknown features are fingerprint features in the query molecule, but not found in the training set.

- All properties and OPS components are within expected ranges.

## Feature Contribution

### Top features for positive contribution

| Fingerprint | Bit/Smiles | Feature Structure                                                                                  | Score | Irritant in training set |
|-------------|------------|----------------------------------------------------------------------------------------------------|-------|--------------------------|
| FCFP_12     | 470041467  | 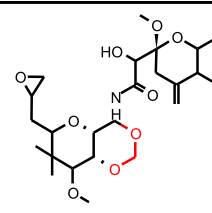<br>[*]OCO[*] | 0.187 | 8 out of 8               |

|                                        |             |                                                                                                                                                     |        |                          |
|----------------------------------------|-------------|-----------------------------------------------------------------------------------------------------------------------------------------------------|--------|--------------------------|
| FCFP_12                                | 346066116   | 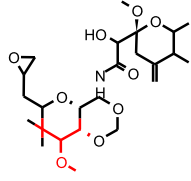<br>[*]C([*])C(OC)C([*])(<br>[*])[*]                             | 0.187  | 8 out of 8               |
| FCFP_12                                | 648139160   | <br>[*][C@@H]1[*]C([*])OC<br>O1                                  | 0.180  | 6 out of 6               |
| Top Features for negative contribution |             |                                                                                                                                                     |        |                          |
| Fingerprint                            | Bit/Smiles  | Feature Structure                                                                                                                                   | Score  | Irritant in training set |
| FCFP_12                                | 1327594201  | <br>[*]CC([*])([*])C([*]<br>[*])[*]                              | -0.140 | 9 out of 13              |
| FCFP_12                                | -1682848062 | <br>[*]CC1O[C@H](C([*])[*]<br>[*])C@H]([*])[*]C1([*]<br>[*])[*] | -0.086 | 14 out of 19             |
| FCFP_12                                | 136597326   | <br>[*]C([*])C                                                 | 0.000  | 612 out of 753           |



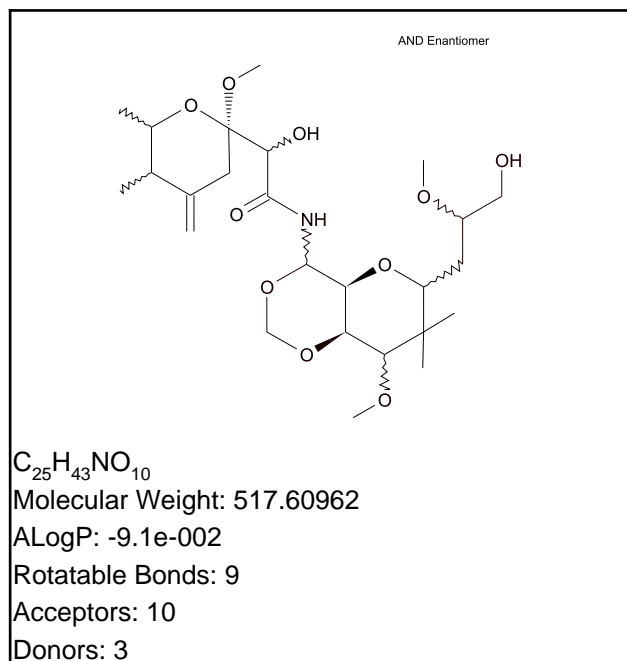

## Model Prediction

Prediction: Irritant

Probability: 1.000

Enrichment: 1.176

Bayesian Score: 1.690

Mahalanobis Distance: 15.146

Mahalanobis Distance p-value: 2.57e-014

Prediction: Positive if the Bayesian score is above the estimated best cutoff value from minimizing the false positive and false negative rate.

Probability: The estimated probability that the sample is in the positive category. This assumes that the Bayesian score follows a normal distribution and is different from the prediction using a cutoff.

Enrichment: An estimate of enrichment, that is, the increased likelihood (versus random) of this sample being in the category.

Bayesian Score: The standard Laplacian-modified Bayesian score.

Mahalanobis Distance: The Mahalanobis distance (MD) is the distance to the center of the training data. The larger the MD, the less trustworthy the prediction.

Mahalanobis Distance p-value: The p-value gives the fraction of training data with an MD greater than or equal to the one for the given sample, assuming normally distributed data. The smaller the p-value, the less trustworthy the prediction. For highly non-normal X properties (e.g., fingerprints), the MD p-value is wildly inaccurate.

## Structural Similar Compounds

| Name               | Fumaric acid; bis(3-allyloxy-2-hydroxypropyl) ester                                 | 2:7-NAPHTHALENE DISULFONIC ACID;4-AMINO-5-HYDROXY-P-TOLUENE SULFONATE (ESTER)       | 4;4'-DIAMINO-1;1'-DIANTHRIMIDE                                                      |
|--------------------|-------------------------------------------------------------------------------------|-------------------------------------------------------------------------------------|-------------------------------------------------------------------------------------|
| Structure          | 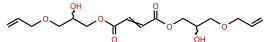 |  |  |
| Actual Endpoint    | Irritant                                                                            | Irritant                                                                            | Irritant                                                                            |
| Predicted Endpoint | Irritant                                                                            | Irritant                                                                            | Irritant                                                                            |
| Distance           | 0.924                                                                               | 0.929                                                                               | 0.985                                                                               |
| Reference          | Prehled Prumyslove Toxikologie; Organicke Latky; Marhold; J. -;646;86               | 28ZPAK-;194;72                                                                      | 28ZPAK-;125;72                                                                      |

## Model Applicability

Unknown features are fingerprint features in the query molecule, but not found in the training set.

1. All properties and OPS components are within expected ranges.

## Feature Contribution

### Top features for positive contribution

| Fingerprint | Bit/Smiles  | Feature Structure                                                                                      | Score | Irritant in training set |
|-------------|-------------|--------------------------------------------------------------------------------------------------------|-------|--------------------------|
| FCFP_12     | -2091721556 | 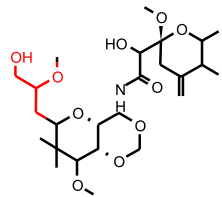<br>[*]CC(CO)O[*] | 0.187 | 8 out of 8               |

| FCFP_12                                | 470041467   | 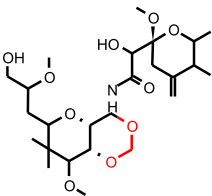    | 0.187  | 8 out of 8               |
|----------------------------------------|-------------|---------------------------------------------------------------------------------------|--------|--------------------------|
| FCFP_12                                | 346066116   |    | 0.187  | 8 out of 8               |
| Top Features for negative contribution |             |                                                                                       |        |                          |
| Fingerprint                            | Bit/Smiles  | Feature Structure                                                                     | Score  | Irritant in training set |
| FCFP_12                                | 1327594201  |    | -0.140 | 9 out of 13              |
| FCFP_12                                | -1682848062 |   | -0.086 | 14 out of 19             |
| FCFP_12                                | 1           |  | 0.000  | 872 out of 1051          |

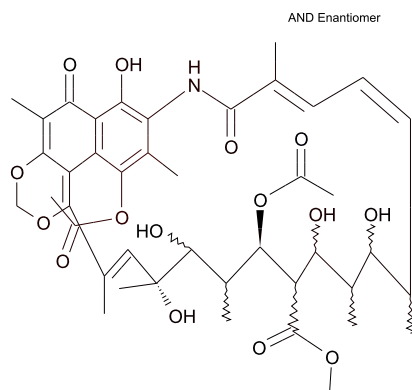
$$\text{C}_{42}\text{H}_{53}\text{NO}_{15}$$

Molecular Weight: 811.86791

ALogP: 2.745

Rotatable Bonds: 6

Acceptors: 15

Donors: 6

## Model Prediction

**Prediction: Irritant**

Probability: 1.000

Enrichment: 1.176

Bayesian Score: 3.446

Mahalanobis Distance: 20.122

Mahalanobis Distance p-value: 2.44e-037

Prediction: Positive if the Bayesian score is above the estimated best cutoff value from minimizing the false positive and false negative rate.

**Probability:** The estimated probability that the sample is in the positive category. This assumes that the Bayesian score follows a normal distribution and is different from the prediction using a cutoff.

Enrichment: An estimate of enrichment, that is, the increased likelihood (versus random) of this sample being in the category.  
Bayesian Score: The standard Laplacian-modified Bayesian score.

**Mahalanobis Distance:** The Mahalanobis distance (MD) is the distance to the center of the training data. The larger the MD, the less trustworthy the prediction.

Mahalanobis Distance p-value: The p-value gives the fraction of training data with an MD greater than or equal to the one for the given sample, assuming normally distributed data. The smaller the p-value, the less trustworthy the prediction. For highly non-normal X properties (e.g., fingerprints), the MD p-value is wildly inaccurate.

## Structural Similar Compounds

|                    |                                                                         |                                                                       |                                                                                |
|--------------------|-------------------------------------------------------------------------|-----------------------------------------------------------------------|--------------------------------------------------------------------------------|
| Name               | 2-Naphthalenesulfonic acid; 5,6'-iminobis(1-hydroxy-                    | Methanol; (s-triazine-2;4;6-triyltrinitrilo)hexa-                     | 2;7-NAPHTHALENE DISULFONIC ACID;4-AMINO-5-HYDROXY-;P-TOLUENE SULFONATE (ESTER) |
| Structure          |                                                                         |                                                                       |                                                                                |
| Actual Endpoint    | Irritant                                                                | Irritant                                                              | Irritant                                                                       |
| Predicted Endpoint | Irritant                                                                | Irritant                                                              | Irritant                                                                       |
| Distance           | 1.329                                                                   | 1.480                                                                 | 1.511                                                                          |
| Reference          | Prehled Prumyslove Toxikologie; Organicke Latky; Marhold; J. pp 1065:86 | Prehled Prumyslove Toxikologie; Organicke Latky; Marhold; J. -:876;86 | 28ZPAK-;194;72                                                                 |

## Model Applicability

Unknown features are fingerprint features in the query molecule, but not found in the training set.

1. OPS PC7 out of range. Value: 6.0687. Training min, max, SD, explained variance: -6.07, 6.0201, 1.57, 0.0301.

### Feature Contribution

| Top features for positive contribution |            |                                                                                                                                                             |       |                          |
|----------------------------------------|------------|-------------------------------------------------------------------------------------------------------------------------------------------------------------|-------|--------------------------|
| Fingerprint                            | Bit/Smiles | Feature Structure                                                                                                                                           | Score | Irritant in training set |
| FCFP_12                                | 1175665944 | 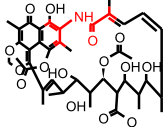<br><chem>[*]C(=[*])C(=O)N[C]([*])([C]([*])([*])):[C]([*])([O])</chem> | 0.198 | 14 out of 14             |

|                                        |             |                                                                                                                                            |        |                          |
|----------------------------------------|-------------|--------------------------------------------------------------------------------------------------------------------------------------------|--------|--------------------------|
| FCFP_12                                | -1979033238 | 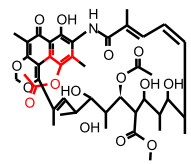<br><chem>[*][c](:[*]):[c](OC(=O)C):[c]([*]):[*]</chem> | 0.192  | 10 out of 10             |
| FCFP_12                                | -1539730963 | <br><chem>[*]:[c](:[*])OC(=O)C</chem>                   | 0.190  | 9 out of 9               |
| Top Features for negative contribution |             |                                                                                                                                            |        |                          |
| Fingerprint                            | Bit/Smiles  | Feature Structure                                                                                                                          | Score  | Irritant in training set |
| FCFP_12                                | -428284881  | <br><chem>[*]C([*])C(OC(=O)C=[*])C([*])[*]</chem>       | -0.229 | 12 out of 19             |
| FCFP_12                                | 565998553   | <br><chem>[*]OC(=O)C=[*]</chem>                        | -0.066 | 198 out of 262           |
| FCFP_12                                | -1678275541 | <br><chem>[*]C(=C(C(=[*])[*])[c]([*])[*])[*])</chem>  | -0.056 | 3 out of 4               |

# Simeprevir

# TOPKAT\_Ocular\_Irritancy\_None\_vs\_Irritant

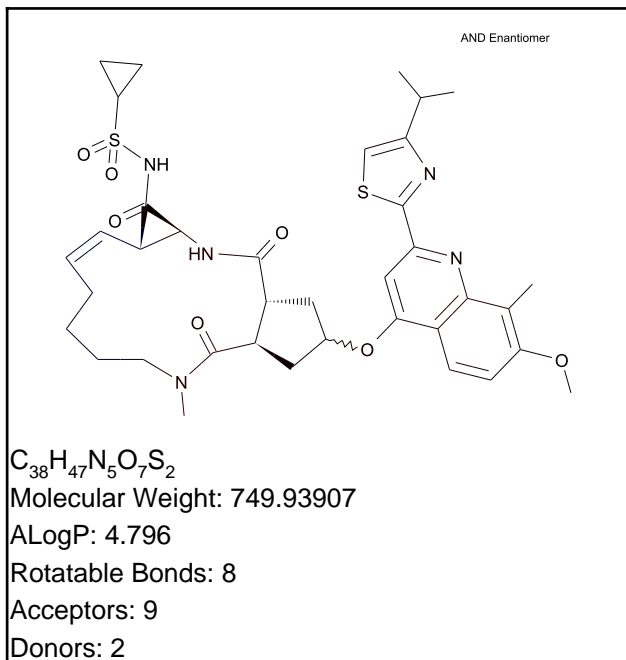

## Model Prediction

Prediction: Irritant

Probability: 1.000

Enrichment: 1.176

Bayesian Score: 1.806

Mahalanobis Distance: 16.456

Mahalanobis Distance p-value: 1.62e-019

Prediction: Positive if the Bayesian score is above the estimated best cutoff value from minimizing the false positive and false negative rate.

Probability: The estimated probability that the sample is in the positive category. This assumes that the Bayesian score follows a normal distribution and is different from the prediction using a cutoff.

Enrichment: An estimate of enrichment, that is, the increased likelihood (versus random) of this sample being in the category. Bayesian Score: The standard Laplacian-modified Bayesian score.

Mahalanobis Distance: The Mahalanobis distance (MD) is the distance to the center of the training data. The larger the MD, the less trustworthy the prediction.

Mahalanobis Distance p-value: The p-value gives the fraction of training data with an MD greater than or equal to the one for the given sample, assuming normally distributed data. The smaller the p-value, the less trustworthy the prediction. For highly non-normal X properties (e.g., fingerprints), the MD p-value is wildly inaccurate.

## Structural Similar Compounds

| Name               | Anthraquinone; 1;1'-(anthraquinon-1;5-ylenediimino)di-                              | Anthraquinone; 1;1'-(anthraquinon-1;4-ylenediimino)di-                              | ANILINE;N;N'-1;4-ANTHRAQUINONYLENEBIS(4-PHENOXY)-                                   |
|--------------------|-------------------------------------------------------------------------------------|-------------------------------------------------------------------------------------|-------------------------------------------------------------------------------------|
| Structure          | 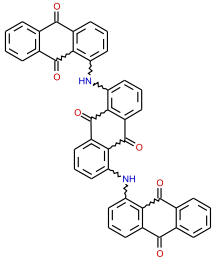 |  |  |
| Actual Endpoint    | Irritant                                                                            | Irritant                                                                            | Non-Irritant                                                                        |
| Predicted Endpoint | Irritant                                                                            | Irritant                                                                            | Non-Irritant                                                                        |
| Distance           | 0.837                                                                               | 0.838                                                                               | 1.053                                                                               |
| Reference          | Prehled Prumyslove Toxikologie; Organicke Latky; Marhold; J. pp 736;86              | Prehled Prumyslove Toxikologie; Organicke Latky; Marhold; J. pp 736;86              | 28ZPAK-;114;72                                                                      |

## Model Applicability

Unknown features are fingerprint features in the query molecule, but not found in the training set.

- All properties and OPS components are within expected ranges.

## Feature Contribution

### Top features for positive contribution

| Fingerprint | Bit/Smiles | Feature Structure                                                                                                     | Score | Irritant in training set |
|-------------|------------|-----------------------------------------------------------------------------------------------------------------------|-------|--------------------------|
| FCFP_12     | 1747237384 | 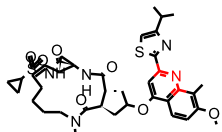<br>[*][c](:[*]):n:[c](:[*]):[*] | 0.208 | 44 out of 44             |

|                                        |             |                                                                                                                                            |        |                          |
|----------------------------------------|-------------|--------------------------------------------------------------------------------------------------------------------------------------------|--------|--------------------------|
| FCFP_12                                | 178336375   | 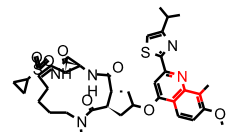<br><chem>[*][c](:[*]):[c](:n:[*]):[c](:[*]):[*]</chem> | 0.202  | 19 out of 19             |
| FCFP_12                                | -124655670  | <br><chem>[*][c]1:[*]:[*]:s:[cH]:1</chem>               | 0.200  | 16 out of 16             |
| Top Features for negative contribution |             |                                                                                                                                            |        |                          |
| Fingerprint                            | Bit/Smiles  | Feature Structure                                                                                                                          | Score  | Irritant in training set |
| FCFP_12                                | -1812846456 | <br><chem>[*]CCCCC=C/C1[*][*]1</chem>                   | -1.014 | 2 out of 9               |
| FCFP_12                                | 690511177   | <br><chem>[*]:[cH]:[c](:n:[*])[c](:[*]):[*]</chem>    | -0.268 | 1 out of 2               |
| FCFP_12                                | 1175638033  | <br><chem>[*]CCCCC([*])[*]</chem>                     | -0.133 | 207 out of 293           |

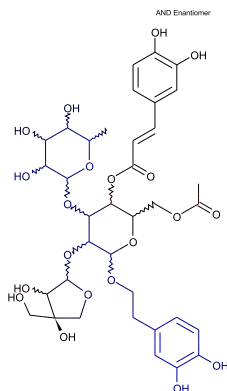

$C_{36}H_{46}O_{20}$

Molecular Weight: 798.73843

ALogP: -0.546

Rotatable Bonds: 16

Acceptors: 20

Donors: 10

## Model Prediction

Prediction: Non-Carcinogen

Probability: 0.180

Enrichment: 0.559

Bayesian Score: -10.360

Mahalanobis Distance: 19.004

Mahalanobis Distance p-value: 1.85e-018

Prediction: Positive if the Bayesian score is above the estimated best cutoff value from minimizing the false positive and false negative rate.

Probability: The estimated probability that the sample is in the positive category. This assumes that the Bayesian score follows a normal distribution and is different from the prediction using a cutoff.

Enrichment: An estimate of enrichment, that is, the increased likelihood (versus random) of this sample being in the category. Bayesian Score: The standard Laplacian-modified Bayesian score.

Mahalanobis Distance: The Mahalanobis distance (MD) is the distance to the center of the training data. The larger the MD, the less trustworthy the prediction.

Mahalanobis Distance p-value: The p-value gives the fraction of training data with an MD greater than or equal to the one for the given sample, assuming normally distributed data. The smaller the p-value, the less trustworthy the prediction. For highly non-normal X properties (e.g., fingerprints), the MD p-value is wildly inaccurate.

## Structural Similar Compounds

| Name               | Rifampin                                                            | Natamycin                                                           | Netilmicin                                                          |
|--------------------|---------------------------------------------------------------------|---------------------------------------------------------------------|---------------------------------------------------------------------|
| Structure          |                                                                     |                                                                     |                                                                     |
| Actual Endpoint    | Non-Carcinogen                                                      | Non-Carcinogen                                                      | Non-Carcinogen                                                      |
| Predicted Endpoint | Non-Carcinogen                                                      | Non-Carcinogen                                                      | Non-Carcinogen                                                      |
| Distance           | 1.538                                                               | 1.559                                                               | 1.576                                                               |
| Reference          | US FDA (Centre for Drug Eval.& Res./Off. Testing & Res.) Sept. 1997 | US FDA (Centre for Drug Eval.& Res./Off. Testing & Res.) Sept. 1997 | US FDA (Centre for Drug Eval.& Res./Off. Testing & Res.) Sept. 1997 |

## Model Applicability

Unknown features are fingerprint features in the query molecule, but not found in the training set.

1. Num\_H\_Acceptors out of range. Value: 20. Training min, max, mean, SD: 0, 15, 4.2304, 2.314.
2. OPS PC3 out of range. Value: 5.9163. Training min, max, SD, explained variance: -7.6052, 5.6498, 2.401, 0.0605.
3. OPS PC4 out of range. Value: 5.1678. Training min, max, SD, explained variance: -5.3573, 4.9476, 2.055, 0.0443.
4. Unknown ECFP\_2 feature: 1953003528: [\*]C[C@@]1(O)C[\*][\*]C1[\*]
5. Unknown ECFP\_2 feature: -176483725: [\*]=C[c](:c:[\*]):c:[\*]

## Feature Contribution

### Top features for positive contribution

| Fingerprint | Bit/Smiles | Feature Structure | Score | Carcinogen in training set |
|-------------|------------|-------------------|-------|----------------------------|
|-------------|------------|-------------------|-------|----------------------------|

|                                        |             |                                                                                                                                             |        |                            |
|----------------------------------------|-------------|---------------------------------------------------------------------------------------------------------------------------------------------|--------|----------------------------|
| ECFP_12                                | -553149446  | <p>AND Enantiomer</p> 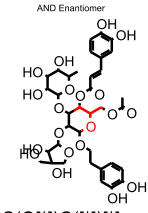 <p>[*]CC(O[*])C([*])([*])</p>     | 0.575  | 3 out of 4                 |
| ECFP_12                                | -521596699  | <p>AND Enantiomer</p>  <p>[*]C1[*][*]C([*])C([*])C1O</p> | 0.445  | 3 out of 5                 |
| ECFP_12                                | -1925046727 | <p>AND Enantiomer</p>  <p>[*]C=[*]</p>                   | 0.407  | 16 out of 33               |
| Top Features for negative contribution |             |                                                                                                                                             |        |                            |
| Fingerprint                            | Bit/Smiles  | Feature Structure                                                                                                                           | Score  | Carcinogen in training set |
| ECFP_12                                | -2060414325 | <p>AND Enantiomer</p>  <p>[*]OC(O[*])C([*])([*])</p>    | -0.811 | 0 out of 4                 |
| ECFP_12                                | 456242574   | <p>AND Enantiomer</p>  <p>[*]C([*])OC([*])([*])</p>    | -0.811 | 0 out of 4                 |



|         |            |                                                                                                                                                             |        |            |
|---------|------------|-------------------------------------------------------------------------------------------------------------------------------------------------------------|--------|------------|
| ECFP_12 | -770374390 | <p>AND Enantiomer</p> 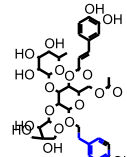 <p>[*]C[c]1:[cH]:[*]c<br/>([*]):[c](O):[cH]:1</p> | -0.661 | 0 out of 3 |
|---------|------------|-------------------------------------------------------------------------------------------------------------------------------------------------------------|--------|------------|

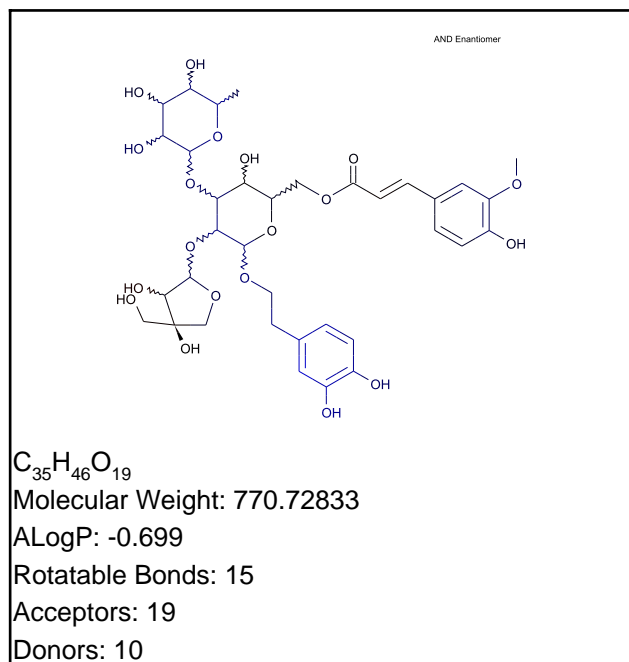

## Model Prediction

Prediction: Non-Carcinogen

Probability: 0.171

Enrichment: 0.532

Bayesian Score: -12.945

Mahalanobis Distance: 19.251

Mahalanobis Distance p-value: 3.88e-019

Prediction: Positive if the Bayesian score is above the estimated best cutoff value from minimizing the false positive and false negative rate.

Probability: The estimated probability that the sample is in the positive category. This assumes that the Bayesian score follows a normal distribution and is different from the prediction using a cutoff.

Enrichment: An estimate of enrichment, that is, the increased likelihood (versus random) of this sample being in the category.

Bayesian Score: The standard Laplacian-modified Bayesian score.

Mahalanobis Distance: The Mahalanobis distance (MD) is the distance to the center of the training data. The larger the MD, the less trustworthy the prediction.

Mahalanobis Distance p-value: The p-value gives the fraction of training data with an MD greater than or equal to the one for the given sample, assuming normally distributed data. The smaller the p-value, the less trustworthy the prediction. For highly non-normal X properties (e.g., fingerprints), the MD p-value is wildly inaccurate.

## Structural Similar Compounds

| Name               | Natamycin                                                                           | Netilmicin                                                                          | Rifampin                                                                            |
|--------------------|-------------------------------------------------------------------------------------|-------------------------------------------------------------------------------------|-------------------------------------------------------------------------------------|
| Structure          | 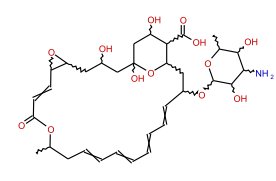 |  |  |
| Actual Endpoint    | Non-Carcinogen                                                                      | Non-Carcinogen                                                                      | Non-Carcinogen                                                                      |
| Predicted Endpoint | Non-Carcinogen                                                                      | Non-Carcinogen                                                                      | Non-Carcinogen                                                                      |
| Distance           | 1.460                                                                               | 1.466                                                                               | 1.475                                                                               |
| Reference          | US FDA (Centre for Drug Eval.& Res./Off. Testing & Res.) Sept. 1997                 | US FDA (Centre for Drug Eval.& Res./Off. Testing & Res.) Sept. 1997                 | US FDA (Centre for Drug Eval.& Res./Off. Testing & Res.) Sept. 1997                 |

## Model Applicability

Unknown features are fingerprint features in the query molecule, but not found in the training set.

1. Num\_H\_Acceptors out of range. Value: 19. Training min, max, mean, SD: 0, 15, 4.2304, 2.314.
2. OPS PC3 out of range. Value: 5.741. Training min, max, SD, explained variance: -7.6052, 5.6498, 2.401, 0.0605.
3. OPS PC4 out of range. Value: 5.2611. Training min, max, SD, explained variance: -5.3573, 4.9476, 2.055, 0.0443.
4. OPS PC13 out of range. Value: -3.0474. Training min, max, SD, explained variance: -2.9848, 6.2909, 1.429, 0.0214.
5. Unknown ECFP\_2 feature: 1953003528: [\*]C[C@@]1(O)C[\*]][\*]C1[\*]
6. Unknown ECFP\_2 feature: -176483725: [\*]=C[c](:c:[\*]):c:[\*]

## Feature Contribution

### Top features for positive contribution

| Fingerprint | Bit/Smiles | Feature Structure | Score | Carcinogen in training set |
|-------------|------------|-------------------|-------|----------------------------|
|-------------|------------|-------------------|-------|----------------------------|

| ECFP_12                                | -553149446  | 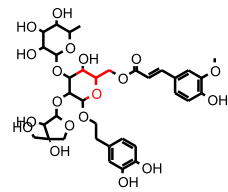<br><chem>[*]CC(O[*])C([*])[*]</chem>      | 0.575  | 3 out of 4                 |
|----------------------------------------|-------------|-------------------------------------------------------------------------------------------------------------------------------|--------|----------------------------|
| ECFP_12                                | -521596699  | <br><chem>[*]C1[*][*]C([*])([*])C1O</chem> | 0.445  | 3 out of 5                 |
| ECFP_12                                | -1925046727 | <br><chem>[*]C=[*]</chem>                  | 0.407  | 16 out of 33               |
| Top Features for negative contribution |             |                                                                                                                               |        |                            |
| Fingerprint                            | Bit/Smiles  | Feature Structure                                                                                                             | Score  | Carcinogen in training set |
| ECFP_12                                | -2060414325 | <br><chem>[*]OC(O[*])C([*])[*]</chem>     | -0.811 | 0 out of 4                 |
| ECFP_12                                | 456242574   | <br><chem>[*]C([*])OC([*])[*]</chem>     | -0.811 | 0 out of 4                 |

ECFP\_12

-770374390

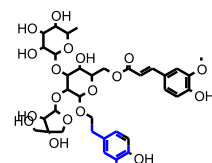

-0.661

0 out of 3

[\*]C[c]1:[cH]:[\*]:[c]  
([\*]):[c](O):[cH]:1

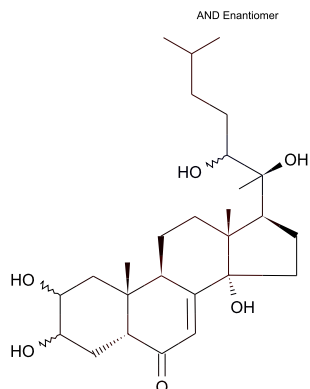
 $C_{27}H_{44}O_6$ 

Molecular Weight: 464.63466

ALogP: 2.489

Rotatable Bonds: 5

Acceptors: 6

Donors: 5

## Model Prediction

**Prediction: Carcinogen**

Probability: 0.335

Enrichment: 1.041

Bayesian Score: 1.667

Mahalanobis Distance: 15.692

Mahalanobis Distance p-value: 5.3e-010

Prediction: Positive if the Bayesian score is above the estimated best cutoff value from minimizing the false positive and false negative rate.

Probability: The estimated probability that the sample is in the positive category. This assumes that the Bayesian score follows a normal distribution and is different from the prediction using a cutoff.

Enrichment: An estimate of enrichment, that is, the increased likelihood (versus random) of this sample being in the category.

Bayesian Score: The standard Laplacian-modified Bayesian score.

Mahalanobis Distance: The Mahalanobis distance (MD) is the distance to the center of the training data. The larger the MD, the less trustworthy the prediction.

Mahalanobis Distance p-value: The p-value gives the fraction of training data with an MD greater than or equal to the one for the given sample, assuming normally distributed data. The smaller the p-value, the less trustworthy the prediction. For highly non-normal X properties (e.g., fingerprints), the MD p-value is wildly inaccurate.

## Structural Similar Compounds

| Name               | Triamcinolone                                                       | Mesuprine                                                           | Budesonide                                                          |
|--------------------|---------------------------------------------------------------------|---------------------------------------------------------------------|---------------------------------------------------------------------|
| Structure          |                                                                     |                                                                     |                                                                     |
| Actual Endpoint    | Non-Carcinogen                                                      | Carcinogen                                                          | Non-Carcinogen                                                      |
| Predicted Endpoint | Non-Carcinogen                                                      | Carcinogen                                                          | Non-Carcinogen                                                      |
| Distance           | 0.789                                                               | 0.798                                                               | 0.808                                                               |
| Reference          | US FDA (Centre for Drug Eval.& Res./Off. Testing & Res.) Sept. 1997 | US FDA (Centre for Drug Eval.& Res./Off. Testing & Res.) Sept. 1997 | US FDA (Centre for Drug Eval.& Res./Off. Testing & Res.) Sept. 1997 |

## Model Applicability

Unknown features are fingerprint features in the query molecule, but not found in the training set.

1. All properties and OPS components are within expected ranges.
2. Unknown ECFP\_2 feature: -483166673: [\*]C(=[\*])[C@]1(O)C[\*][\*]C1([\*])[\*]
3. Unknown ECFP\_2 feature: -1049278438: [\*]C([\*])([\*])[C@H]1C[\*][\*]C1([\*])[\*]
4. Unknown ECFP\_2 feature: 1195714366: [\*]C([\*])C(C)(O)C([\*])[\*]
5. Unknown ECFP\_2 feature: -211745668: [\*]C([\*])C(=O)C=[\*]
6. Unknown ECFP\_2 feature: 80071435: [\*]CC(O)C([\*])([\*])[\*]

## Feature Contribution

### Top features for positive contribution

| Fingerprint | Bit/Smiles | Feature Structure | Score | Carcinogen in training set |
|-------------|------------|-------------------|-------|----------------------------|
| ECFP_12     | 1035165602 | <br>[*]CC(C)C     | 0.575 | 3 out of 4                 |

|                                        |             |                                                                                                                                          |        |                            |
|----------------------------------------|-------------|------------------------------------------------------------------------------------------------------------------------------------------|--------|----------------------------|
| ECFP_12                                | -84975114   | 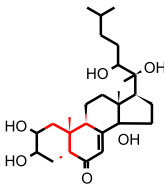 <chem>[*]CC(C)(C([*])([*])C([*])([*])</chem>          | 0.539  | 5 out of 8                 |
| ECFP_12                                | 1908695621  |  <chem>[*]C=C(C([*])([*])C([*])([*])([*])</chem>      | 0.421  | 1 out of 1                 |
| Top Features for negative contribution |             |                                                                                                                                          |        |                            |
| Fingerprint                            | Bit/Smiles  | Feature Structure                                                                                                                        | Score  | Carcinogen in training set |
| ECFP_12                                | 333674688   |  <chem>[*]C[C@@H](C(=[*])([*])C([*])([*])([*])</chem> | -0.272 | 0 out of 1                 |
| ECFP_12                                | 2023785560  |  <chem>[*]C([*])O</chem>                             | -0.253 | 9 out of 38                |
| ECFP_12                                | -1910270391 |  <chem>[*]C([*])([*])</chem>                        | -0.216 | 26 out of 104              |

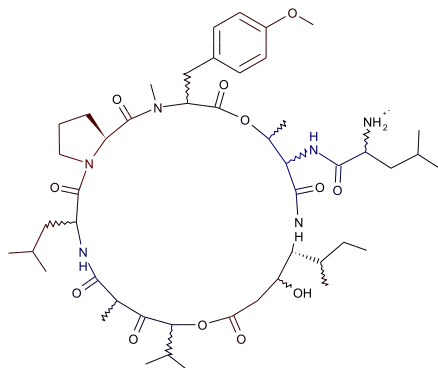

$C_{49}H_{79}N_6O_{12}$

Molecular Weight: 944.18455

ALogP: 3.176

Rotatable Bonds: 13

Acceptors: 12

Donors: 5

## Model Prediction

Prediction: Non-Carcinogen

Probability: 0.253

Enrichment: 0.784

Bayesian Score: -2.607

Mahalanobis Distance: 16.345

Mahalanobis Distance p-value: 1.49e-011

Prediction: Positive if the Bayesian score is above the estimated best cutoff value from minimizing the false positive and false negative rate.

Probability: The estimated probability that the sample is in the positive category. This assumes that the Bayesian score follows a normal distribution and is different from the prediction using a cutoff.

Enrichment: An estimate of enrichment, that is, the increased likelihood (versus random) of this sample being in the category.

Bayesian Score: The standard Laplacian-modified Bayesian score.

Mahalanobis Distance: The Mahalanobis distance (MD) is the distance to the center of the training data. The larger the MD, the less trustworthy the prediction.

Mahalanobis Distance p-value: The p-value gives the fraction of training data with an MD greater than or equal to the one for the given sample, assuming normally distributed data. The smaller the p-value, the less trustworthy the prediction. For highly non-normal X properties (e.g., fingerprints), the MD p-value is wildly inaccurate.

## Structural Similar Compounds

| Name               | Erythromycin                                                        | Rifabutin                                                           | Rifampin                                                            |
|--------------------|---------------------------------------------------------------------|---------------------------------------------------------------------|---------------------------------------------------------------------|
| Structure          |                                                                     |                                                                     |                                                                     |
| Actual Endpoint    | Non-Carcinogen                                                      | Non-Carcinogen                                                      | Non-Carcinogen                                                      |
| Predicted Endpoint | Non-Carcinogen                                                      | Non-Carcinogen                                                      | Non-Carcinogen                                                      |
| Distance           | 1.025                                                               | 1.034                                                               | 1.090                                                               |
| Reference          | US FDA (Centre for Drug Eval.& Res./Off. Testing & Res.) Sept. 1997 | US FDA (Centre for Drug Eval.& Res./Off. Testing & Res.) Sept. 1997 | US FDA (Centre for Drug Eval.& Res./Off. Testing & Res.) Sept. 1997 |

## Model Applicability

Unknown features are fingerprint features in the query molecule, but not found in the training set.

1. Molecular\_Weight out of range. Value: 944.18. Training min, max, mean, SD: 46.068, 847, 306.62, 116.4.
2. Unknown ECFP\_2 feature: -591526139: [\*][NH2+][\*]
3. Unknown ECFP\_2 feature: 1352327988: [\*]C([\*])[NH2+]C
4. Unknown ECFP\_2 feature: 1691770380: [\*]NC(C([\*])[\*])C([\*])[\*]
5. Unknown ECFP\_2 feature: 771121623: [\*]C([\*])C[c]([\*]):[\*]:[\*]
6. Unknown ECFP\_2 feature: -714938792: [\*]C(=[\*])C(C)C(=[\*])[\*]
7. Unknown ECFP\_2 feature: 20550775: [\*]CC([NH2+][\*])C(=[\*])[\*]
8. Unknown ECFP\_2 feature: 866401773: [\*][NH2+]C

## Feature Contribution

### Top features for positive contribution

| Fingerprint | Bit/Smiles | Feature Structure | Score | Carcinogen in training set |
|-------------|------------|-------------------|-------|----------------------------|
|-------------|------------|-------------------|-------|----------------------------|

|         |            |                                                                                                                            |       |             |
|---------|------------|----------------------------------------------------------------------------------------------------------------------------|-------|-------------|
| ECFP_12 | 1038798692 | 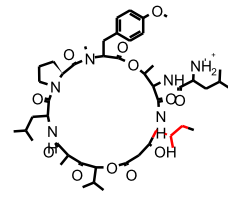<br><chem>[*]CC(C)C([*])([*])</chem>    | 0.613 | 2 out of 2  |
| ECFP_12 | 1035165602 | <br><chem>[*]CC(C)C</chem>              | 0.575 | 3 out of 4  |
| ECFP_12 | 53207596   | <br><chem>[*]C([*])CC(=[*])([*])</chem> | 0.459 | 8 out of 15 |

### Top Features for negative contribution

| Fingerprint | Bit/Smiles  | Feature Structure                                                                                                                   | Score  | Carcinogen in training set |
|-------------|-------------|-------------------------------------------------------------------------------------------------------------------------------------|--------|----------------------------|
| ECFP_12     | -1567199489 | 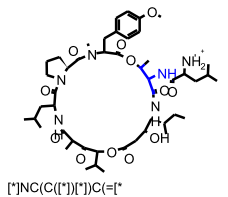<br><chem>[*]NC(C([*])([*])C(=[*]))([*])</chem> | -0.811 | 0 out of 4                 |
| ECFP_12     | -949992060  | <br><chem>[*]C([*])CC</chem>                   | -0.811 | 0 out of 4                 |



ECFP\_12

-1693599735

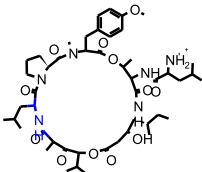

[\*]C([\*])NC(=[\*])[\*]

-0.661

0 out of 3

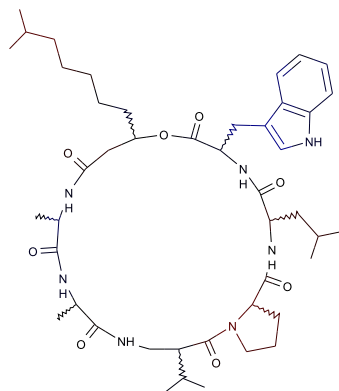

$C_{45}H_{69}N_7O_8$

Molecular Weight: 836.07145

ALogP: 4.986

Rotatable Bonds: 11

Acceptors: 8

Donors: 6

## Model Prediction

Prediction: Carcinogen

Probability: 0.305

Enrichment: 0.949

Bayesian Score: 0.338

Mahalanobis Distance: 14.665

Mahalanobis Distance p-value: 1e-007

Prediction: Positive if the Bayesian score is above the estimated best cutoff value from minimizing the false positive and false negative rate.

Probability: The estimated probability that the sample is in the positive category. This assumes that the Bayesian score follows a normal distribution and is different from the prediction using a cutoff.

Enrichment: An estimate of enrichment, that is, the increased likelihood (versus random) of this sample being in the category.

Bayesian Score: The standard Laplacian-modified Bayesian score.

Mahalanobis Distance: The Mahalanobis distance (MD) is the distance to the center of the training data. The larger the MD, the less trustworthy the prediction.

Mahalanobis Distance p-value: The p-value gives the fraction of training data with an MD greater than or equal to the one for the given sample, assuming normally distributed data. The smaller the p-value, the less trustworthy the prediction. For highly non-normal X properties (e.g., fingerprints), the MD p-value is wildly inaccurate.

## Structural Similar Compounds

| Name               | Erythromycin                                                        | Bromocriptine                                                       | Rifabutin                                                           |
|--------------------|---------------------------------------------------------------------|---------------------------------------------------------------------|---------------------------------------------------------------------|
| Structure          |                                                                     |                                                                     |                                                                     |
| Actual Endpoint    | Non-Carcinogen                                                      | Carcinogen                                                          | Non-Carcinogen                                                      |
| Predicted Endpoint | Non-Carcinogen                                                      | Carcinogen                                                          | Non-Carcinogen                                                      |
| Distance           | 1.120                                                               | 1.132                                                               | 1.144                                                               |
| Reference          | US FDA (Centre for Drug Eval.& Res./Off. Testing & Res.) Sept. 1997 | US FDA (Centre for Drug Eval.& Res./Off. Testing & Res.) Sept. 1997 | US FDA (Centre for Drug Eval.& Res./Off. Testing & Res.) Sept. 1997 |

## Model Applicability

Unknown features are fingerprint features in the query molecule, but not found in the training set.

1. All properties and OPS components are within expected ranges.
2. Unknown ECFP\_2 feature: 771121623: [\*]C([\*])C[c](:[\*]):[\*]
3. Unknown ECFP\_2 feature: 1863041499: [\*]NC(C)C(=[\*])[\*]
4. Unknown ECFP\_2 feature: -2096927833: [\*]CC(C([\*])[\*])C(=[\*])[\*]

## Feature Contribution

### Top features for positive contribution

| Fingerprint | Bit/Smiles | Feature Structure | Score | Carcinogen in training set |
|-------------|------------|-------------------|-------|----------------------------|
| ECFP_12     | 1035165602 | <br>[*]CC(C)C     | 0.575 | 3 out of 4                 |

| ECFP_12                                | 53207596    | 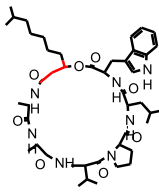<br><chem>[*]C([*])CC(=[*])[*]</chem>                                        | 0.459  | 8 out of 15                |
|----------------------------------------|-------------|-----------------------------------------------------------------------------------------------------------------------------------------------------------------|--------|----------------------------|
| ECFP_12                                | 1099224616  | <br><chem>[*]:[cH]:[c]1:[hH]:[*]<br/>:[*]:[c]:1:[*]</chem>                   | 0.456  | 6 out of 11                |
| Top Features for negative contribution |             |                                                                                                                                                                 |        |                            |
| Fingerprint                            | Bit/Smiles  | Feature Structure                                                                                                                                               | Score  | Carcinogen in training set |
| ECFP_12                                | -1659633832 | <br><chem>[*][c]1:[cH]:[c]1:[c]<br/>2:[cH]:[cH]:[*]:[cH]<br/>:[c]:1:2</chem> | -0.661 | 0 out of 3                 |
| ECFP_12                                | -1693599735 | <br><chem>[*]C([*])NC(=[*])[*]</chem>                                       | -0.661 | 0 out of 3                 |
| ECFP_12                                | -867777309  | <br><chem>[*]NC(=O)C([*])[*]</chem>                                        | -0.661 | 0 out of 3                 |

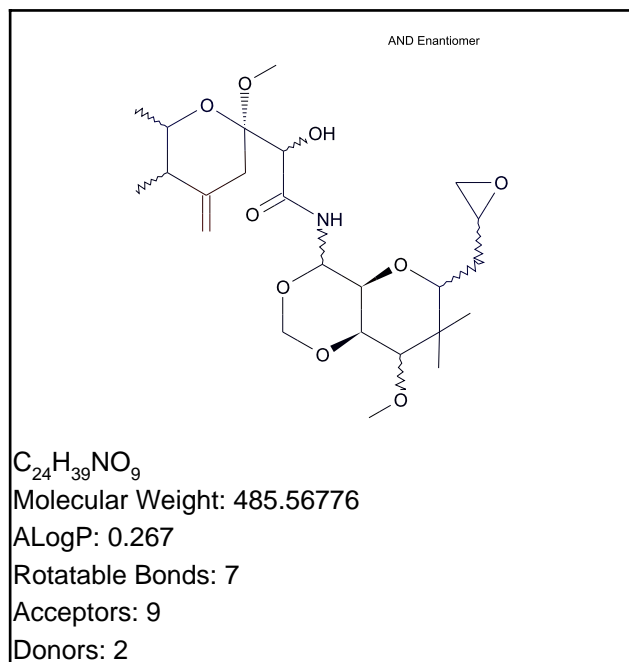

## Model Prediction

Prediction: Non-Carcinogen

Probability: 0.215

Enrichment: 0.668

Bayesian Score: -5.561

Mahalanobis Distance: 14.930

Mahalanobis Distance p-value: 2.72e-008

Prediction: Positive if the Bayesian score is above the estimated best cutoff value from minimizing the false positive and false negative rate.

Probability: The estimated probability that the sample is in the positive category. This assumes that the Bayesian score follows a normal distribution and is different from the prediction using a cutoff.

Enrichment: An estimate of enrichment, that is, the increased likelihood (versus random) of this sample being in the category.

Bayesian Score: The standard Laplacian-modified Bayesian score.

Mahalanobis Distance: The Mahalanobis distance (MD) is the distance to the center of the training data. The larger the MD, the less trustworthy the prediction.

Mahalanobis Distance p-value: The p-value gives the fraction of training data with an MD greater than or equal to the one for the given sample, assuming normally distributed data. The smaller the p-value, the less trustworthy the prediction. For highly non-normal X properties (e.g., fingerprints), the MD p-value is wildly inaccurate.

## Structural Similar Compounds

| Name               | Bacampicillin                                                                       | Lasiocarpine                                                                        | Budesonide                                                                          |
|--------------------|-------------------------------------------------------------------------------------|-------------------------------------------------------------------------------------|-------------------------------------------------------------------------------------|
| Structure          | 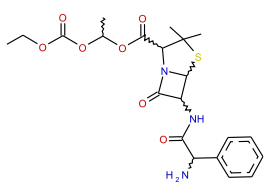 |  |  |
| Actual Endpoint    | Non-Carcinogen                                                                      | Carcinogen                                                                          | Non-Carcinogen                                                                      |
| Predicted Endpoint | Non-Carcinogen                                                                      | Carcinogen                                                                          | Non-Carcinogen                                                                      |
| Distance           | 0.728                                                                               | 0.735                                                                               | 0.784                                                                               |
| Reference          | US FDA (Centre for Drug Eval.& Res./Off. Testing & Res.) Sept. 1997                 | US FDA (Centre for Drug Eval.& Res./Off. Testing & Res.) Sept. 1997                 | US FDA (Centre for Drug Eval.& Res./Off. Testing & Res.) Sept. 1997                 |

## Model Applicability

Unknown features are fingerprint features in the query molecule, but not found in the training set.

1. All properties and OPS components are within expected ranges.
2. Unknown ECFP\_2 feature: -457637478: [\*]NC(O[\*])C([\*])[\*]
3. Unknown ECFP\_2 feature: 837844420: [\*]CC(O[\*])(O[\*])C([\*])[\*]
4. Unknown ECFP\_2 feature: 825070174: [\*]C(=[\*])C(O)C([\*])([\*])[\*]

## Feature Contribution

### Top features for positive contribution

| Fingerprint | Bit/Smiles  | Feature Structure                                                                                                 | Score | Carcinogen in training set |
|-------------|-------------|-------------------------------------------------------------------------------------------------------------------|-------|----------------------------|
| ECFP_12     | -2085781978 | 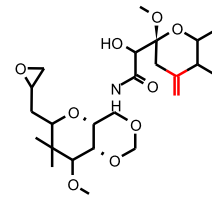<br><chem>[*]C(=C)[*]</chem> | 0.613 | 2 out of 2                 |

| ECFP_12                                | 1377749300 | 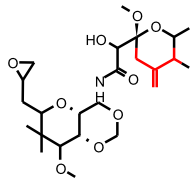<br><chem>[*]CC(=C)C([*])([*])</chem>    | 0.421  | 1 out of 1                 |
|----------------------------------------|------------|-----------------------------------------------------------------------------------------------------------------------------|--------|----------------------------|
| ECFP_12                                | 683445015  | <br><chem>[*]O[*]</chem>                 | 0.294  | 28 out of 66               |
| Top Features for negative contribution |            |                                                                                                                             |        |                            |
| Fingerprint                            | Bit/Smiles | Feature Structure                                                                                                           | Score  | Carcinogen in training set |
| ECFP_12                                | 1535429263 | <br><chem>[*]OC(C)C([*])([*])</chem>     | -0.485 | 0 out of 2                 |
| ECFP_12                                | 1067196438 | <br><chem>[*]C([*])C(C)(O)C([*])</chem> | -0.485 | 0 out of 2                 |
| ECFP_12                                | -194719409 | <br><chem>[*]C([*])OC([*])([*])</chem> | -0.466 | 1 out of 7                 |

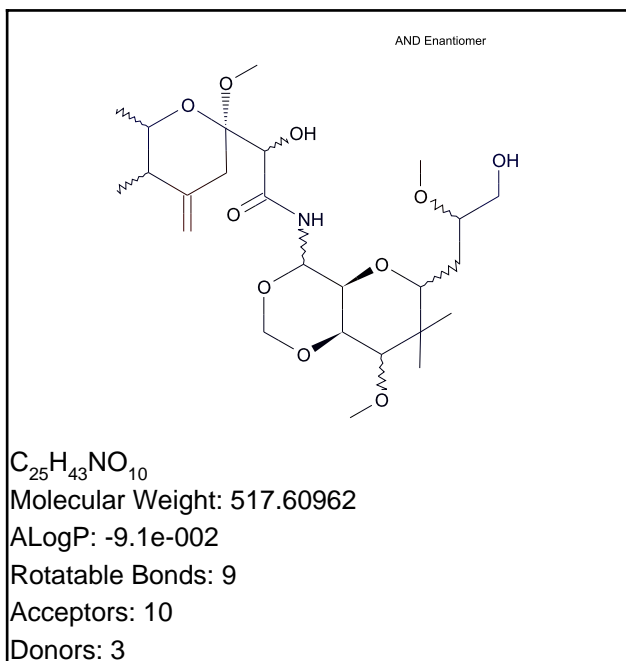

## Model Prediction

Prediction: Non-Carcinogen

Probability: 0.220

Enrichment: 0.682

Bayesian Score: -5.128

Mahalanobis Distance: 14.718

Mahalanobis Distance p-value: 7.74e-008

Prediction: Positive if the Bayesian score is above the estimated best cutoff value from minimizing the false positive and false negative rate.

Probability: The estimated probability that the sample is in the positive category. This assumes that the Bayesian score follows a normal distribution and is different from the prediction using a cutoff.

Enrichment: An estimate of enrichment, that is, the increased likelihood (versus random) of this sample being in the category.

Bayesian Score: The standard Laplacian-modified Bayesian score.

Mahalanobis Distance: The Mahalanobis distance (MD) is the distance to the center of the training data. The larger the MD, the less trustworthy the prediction.

Mahalanobis Distance p-value: The p-value gives the fraction of training data with an MD greater than or equal to the one for the given sample, assuming normally distributed data. The smaller the p-value, the less trustworthy the prediction. For highly non-normal X properties (e.g., fingerprints), the MD p-value is wildly inaccurate.

## Structural Similar Compounds

| Name               | Bacampicillin                                                                       | Lasiocarpine                                                                        | Dipyridamole                                                                        |
|--------------------|-------------------------------------------------------------------------------------|-------------------------------------------------------------------------------------|-------------------------------------------------------------------------------------|
| Structure          | 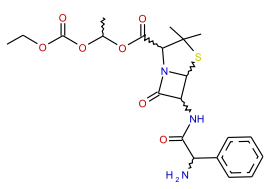 |  |  |
| Actual Endpoint    | Non-Carcinogen                                                                      | Carcinogen                                                                          | Non-Carcinogen                                                                      |
| Predicted Endpoint | Non-Carcinogen                                                                      | Carcinogen                                                                          | Non-Carcinogen                                                                      |
| Distance           | 0.748                                                                               | 0.800                                                                               | 0.867                                                                               |
| Reference          | US FDA (Centre for Drug Eval.& Res./Off. Testing & Res.) Sept. 1997                 | US FDA (Centre for Drug Eval.& Res./Off. Testing & Res.) Sept. 1997                 | US FDA (Centre for Drug Eval.& Res./Off. Testing & Res.) Sept. 1997                 |

## Model Applicability

Unknown features are fingerprint features in the query molecule, but not found in the training set.

1. All properties and OPS components are within expected ranges.
2. Unknown ECFP\_2 feature: -457637478: [\*]NC(O[\*])C([\*])[\*]
3. Unknown ECFP\_2 feature: 837844420: [\*]CC(O[\*])(O[\*])C([\*])[\*]
4. Unknown ECFP\_2 feature: 825070174: [\*]C(=[\*])C(O)C([\*])([\*])[\*]

## Feature Contribution

### Top features for positive contribution

| Fingerprint | Bit/Smiles  | Feature Structure                                                                                    | Score | Carcinogen in training set |
|-------------|-------------|------------------------------------------------------------------------------------------------------|-------|----------------------------|
| ECFP_12     | -2085781978 | 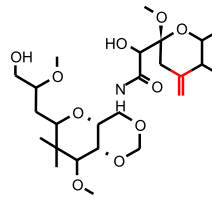<br>[*]C(=C)[*] | 0.613 | 2 out of 2                 |

| ECFP_12                                | 1377749300  | 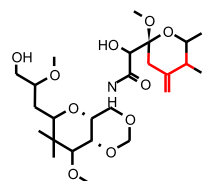<br><chem>[*]CC(=C)C([*])([*])</chem>     | 0.421  | 1 out of 1                 |
|----------------------------------------|-------------|------------------------------------------------------------------------------------------------------------------------------|--------|----------------------------|
| ECFP_12                                | -410173153  | <br><chem>[*]C([*])OC</chem>              | 0.421  | 1 out of 1                 |
| Top Features for negative contribution |             |                                                                                                                              |        |                            |
| Fingerprint                            | Bit/Smiles  | Feature Structure                                                                                                            | Score  | Carcinogen in training set |
| ECFP_12                                | -1909093651 | <br><chem>[*]C([*])CO</chem>              | -1.056 | 0 out of 6                 |
| ECFP_12                                | 1535429263  | <br><chem>[*]OC(C)C([*])([*])</chem>     | -0.485 | 0 out of 2                 |
| ECFP_12                                | 1067196438  | <br><chem>[*]C([*])C(C)(C)C([*])</chem> | -0.485 | 0 out of 2                 |

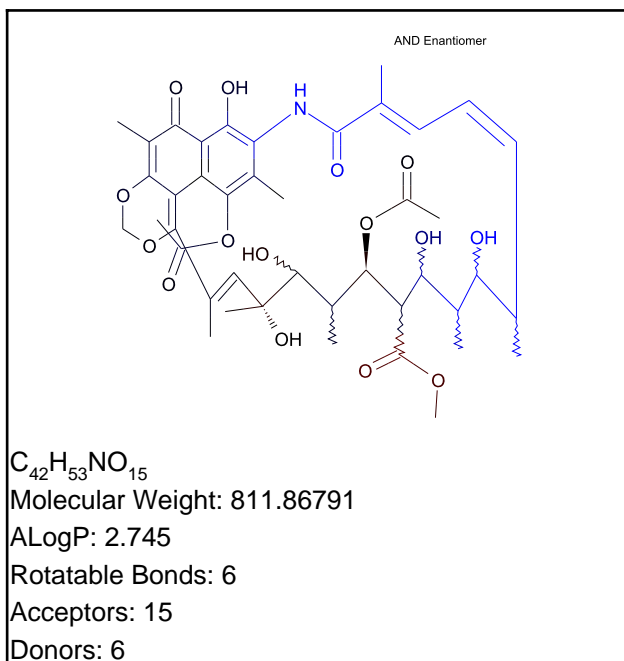

## Model Prediction

Prediction: Non-Carcinogen

Probability: 0.152

Enrichment: 0.471

Bayesian Score: -16.239

Mahalanobis Distance: 11.987

Mahalanobis Distance p-value: 0.00495

Prediction: Positive if the Bayesian score is above the estimated best cutoff value from minimizing the false positive and false negative rate.

Probability: The estimated probability that the sample is in the positive category. This assumes that the Bayesian score follows a normal distribution and is different from the prediction using a cutoff.

Enrichment: An estimate of enrichment, that is, the increased likelihood (versus random) of this sample being in the category.

Bayesian Score: The standard Laplacian-modified Bayesian score.

Mahalanobis Distance: The Mahalanobis distance (MD) is the distance to the center of the training data. The larger the MD, the less trustworthy the prediction.

Mahalanobis Distance p-value: The p-value gives the fraction of training data with an MD greater than or equal to the one for the given sample, assuming normally distributed data. The smaller the p-value, the less trustworthy the prediction. For highly non-normal X properties (e.g., fingerprints), the MD p-value is wildly inaccurate.

## Structural Similar Compounds

| Name               | Rifampin                                                                            | Rifabutin                                                                           | Erythromycin                                                                        |
|--------------------|-------------------------------------------------------------------------------------|-------------------------------------------------------------------------------------|-------------------------------------------------------------------------------------|
| Structure          | 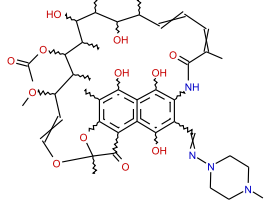 |  |  |
| Actual Endpoint    | Non-Carcinogen                                                                      | Non-Carcinogen                                                                      | Non-Carcinogen                                                                      |
| Predicted Endpoint | Non-Carcinogen                                                                      | Non-Carcinogen                                                                      | Non-Carcinogen                                                                      |
| Distance           | 0.505                                                                               | 0.679                                                                               | 0.854                                                                               |
| Reference          | US FDA (Centre for Drug Eval.& Res./Off. Testing & Res.) Sept. 1997                 | US FDA (Centre for Drug Eval.& Res./Off. Testing & Res.) Sept. 1997                 | US FDA (Centre for Drug Eval.& Res./Off. Testing & Res.) Sept. 1997                 |

## Model Applicability

Unknown features are fingerprint features in the query molecule, but not found in the training set.

1. All properties and OPS components are within expected ranges.
2. Unknown ECFP\_2 feature: -40769921: [\*]C([\*])[C@](C)(O)C=[\*]
3. Unknown ECFP\_2 feature: 464446479: [\*]C(=CC([\*])([\*])[\*])[\*]

## Feature Contribution

### Top features for positive contribution

| Fingerprint | Bit/Smiles | Feature Structure                                                                                                      | Score | Carcinogen in training set |
|-------------|------------|------------------------------------------------------------------------------------------------------------------------|-------|----------------------------|
| ECFP_12     | -954757448 | 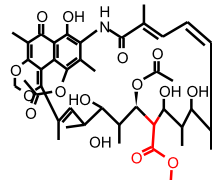<br><chem>[*]C([*])C(=O)OC</chem> | 0.613 | 2 out of 2                 |



|                                        |             |                                                                                                                                         |        |                            |
|----------------------------------------|-------------|-----------------------------------------------------------------------------------------------------------------------------------------|--------|----------------------------|
| ECFP_12                                | 706080645   | 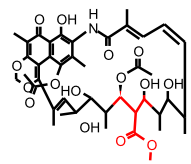<br><chem>[*]C([*])C(C([*])([*])C(=O)OC</chem>       | 0.613  | 2 out of 2                 |
| ECFP_12                                | -1531301414 | <br><chem>[*]O[c](:[c]([*]):[*]):[c]([*]):[*]</chem> | 0.454  | 5 out of 9                 |
| Top Features for negative contribution |             |                                                                                                                                         |        |                            |
| Fingerprint                            | Bit/Smiles  | Feature Structure                                                                                                                       | Score  | Carcinogen in training set |
| ECFP_12                                | -1660913849 | <br><chem>[*][c](:[*]):[c](O):[c]([*]):[*]</chem>    | -0.941 | 0 out of 5                 |
| ECFP_12                                | 1311676480  | <br><chem>[*]C(=[*])O[c]([*]):[*]</chem>           | -0.811 | 0 out of 4                 |
| ECFP_12                                | 824248976   | <br><chem>[*]C([*])C(C)C([*])[*]</chem>            | -0.661 | 0 out of 3                 |

# Simeprevir

# TOPKAT\_Rat\_Female\_FDA\_None\_vs\_Carcinogen

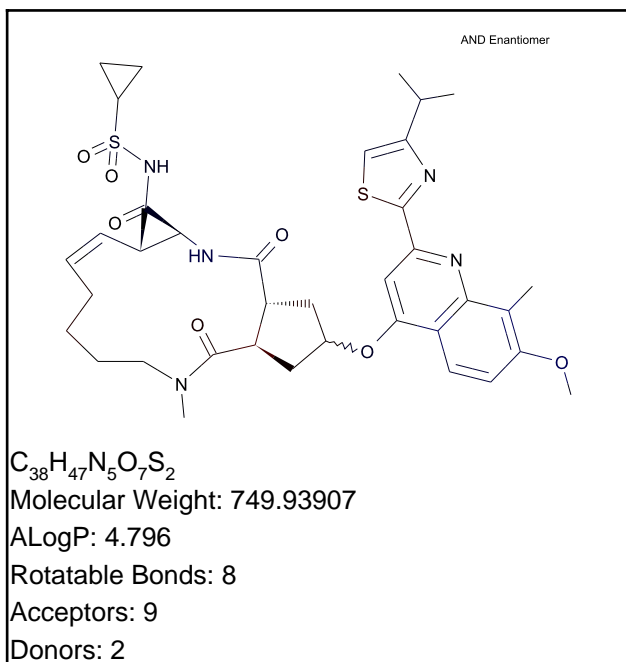

## Model Prediction

Prediction: Non-Carcinogen

Probability: 0.231

Enrichment: 0.719

Bayesian Score: -4.130

Mahalanobis Distance: 14.568

Mahalanobis Distance p-value: 1.6e-007

Prediction: Positive if the Bayesian score is above the estimated best cutoff value from minimizing the false positive and false negative rate.

Probability: The estimated probability that the sample is in the positive category. This assumes that the Bayesian score follows a normal distribution and is different from the prediction using a cutoff.

Enrichment: An estimate of enrichment, that is, the increased likelihood (versus random) of this sample being in the category.

Bayesian Score: The standard Laplacian-modified Bayesian score.

Mahalanobis Distance: The Mahalanobis distance (MD) is the distance to the center of the training data. The larger the MD, the less trustworthy the prediction.

Mahalanobis Distance p-value: The p-value gives the fraction of training data with an MD greater than or equal to the one for the given sample, assuming normally distributed data. The smaller the p-value, the less trustworthy the prediction. For highly non-normal X properties (e.g., fingerprints), the MD p-value is wildly inaccurate.

## Structural Similar Compounds

| Name               | Reserpine                                                                           | Deserpidine                                                                         | Bromocriptine                                                                       |
|--------------------|-------------------------------------------------------------------------------------|-------------------------------------------------------------------------------------|-------------------------------------------------------------------------------------|
| Structure          | 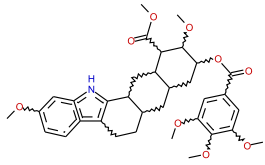 |  |  |
| Actual Endpoint    | Carcinogen                                                                          | Carcinogen                                                                          | Carcinogen                                                                          |
| Predicted Endpoint | Carcinogen                                                                          | Carcinogen                                                                          | Carcinogen                                                                          |
| Distance           | 0.807                                                                               | 0.846                                                                               | 0.874                                                                               |
| Reference          | US FDA (Centre for Drug Eval.& Res./Off. Testing & Res.) Sept. 1997                 | US FDA (Centre for Drug Eval.& Res./Off. Testing & Res.) Sept. 1997                 | US FDA (Centre for Drug Eval.& Res./Off. Testing & Res.) Sept. 1997                 |

## Model Applicability

Unknown features are fingerprint features in the query molecule, but not found in the training set.

1. All properties and OPS components are within expected ranges.
2. Unknown ECFP\_2 feature: -309676563: [\*]N[C@]1(C[C@H]1[\*])C(=[\*])[\*]
3. Unknown ECFP\_2 feature: -1049290660: [\*]C1([\*])C[C@H]1C=[\*]
4. Unknown ECFP\_2 feature: 1616402542: [\*]CN(C)C(=[\*])[\*]
5. Unknown ECFP\_2 feature: -1818486371: [\*]NC(=O)C1([\*])[\*][\*]1
6. Unknown ECFP\_2 feature: 1310940530: [\*]C([\*])O[c](:[\*]):[\*]
7. Unknown ECFP\_2 feature: 733491677: [\*]:c](:[\*])C(C)C
8. Unknown ECFP\_2 feature: 2121941848: [\*]NS(=O)(=O)C1[\*][\*]1
9. Unknown ECFP\_2 feature: -622223421: [\*]S(=[\*])(=[\*])C1CC1

## Feature Contribution

### Top features for positive contribution

| Fingerprint | Bit/Smiles | Feature Structure | Score | Carcinogen in training set |
|-------------|------------|-------------------|-------|----------------------------|
|-------------|------------|-------------------|-------|----------------------------|

|                                        |             |                                                                                                                                                  |        |                            |
|----------------------------------------|-------------|--------------------------------------------------------------------------------------------------------------------------------------------------|--------|----------------------------|
| ECFP_12                                | -1331088410 | 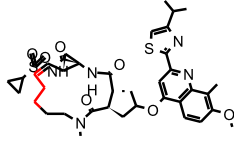<br><chem>[*]CCC=[*]</chem>                                   | 0.725  | 3 out of 3                 |
| ECFP_12                                | -2095963820 | <br><chem>[*]C@@H1[*]1[*]C[C@H]1C(=[*])[*]</chem>             | 0.722  | 12 out of 17               |
| ECFP_12                                | 914325265   | <br><chem>[*]:s:[*]</chem>                                    | 0.516  | 8 out of 14                |
| Top Features for negative contribution |             |                                                                                                                                                  |        |                            |
| Fingerprint                            | Bit/Smiles  | Feature Structure                                                                                                                                | Score  | Carcinogen in training set |
| ECFP_12                                | 2077607946  | <br><chem>[*]O[c]1:[cH]:[cH]:[c]1(:[*]):[*]:[c]:1[*]</chem> | -1.253 | 0 out of 8                 |
| ECFP_12                                | -867777309  | <br><chem>[*]NC(=O)C([*])[*]</chem>                         | -0.661 | 0 out of 3                 |

ECFP\_12

1408898974

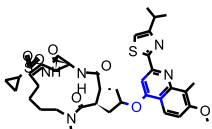

[\*]O[c](:[cH]:[\*]):[c]  
[(\*):[\*]]

-0.517

5 out of 29

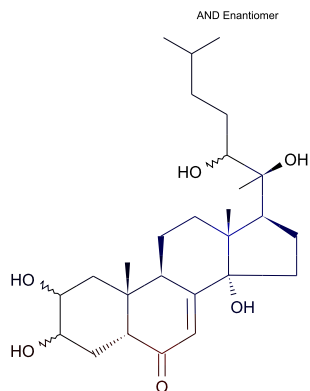
 $C_{27}H_{44}O_6$ 

Molecular Weight: 464.63466

ALogP: 2.489

Rotatable Bonds: 5

Acceptors: 6

Donors: 5

## Model Prediction

Prediction: Single-Carcinogen

Probability: 0.425

Enrichment: 1.138

Bayesian Score: -2.582

Mahalanobis Distance: 15.663

Mahalanobis Distance p-value: 6.91e-007

Prediction: Positive if the Bayesian score is above the estimated best cutoff value from minimizing the false positive and false negative rate.

Probability: The estimated probability that the sample is in the positive category. This assumes that the Bayesian score follows a normal distribution and is different from the prediction using a cutoff.

Enrichment: An estimate of enrichment, that is, the increased likelihood (versus random) of this sample being in the category.

Bayesian Score: The standard Laplacian-modified Bayesian score.

Mahalanobis Distance: The Mahalanobis distance (MD) is the distance to the center of the training data. The larger the MD, the less trustworthy the prediction.

Mahalanobis Distance p-value: The p-value gives the fraction of training data with an MD greater than or equal to the one for the given sample, assuming normally distributed data. The smaller the p-value, the less trustworthy the prediction. For highly non-normal X properties (e.g., fingerprints), the MD p-value is wildly inaccurate.

## Structural Similar Compounds

| Name               | Mesuprine                                                           | Ursodiol                                                            | Minocycline                                                         |
|--------------------|---------------------------------------------------------------------|---------------------------------------------------------------------|---------------------------------------------------------------------|
| Structure          |                                                                     |                                                                     |                                                                     |
| Actual Endpoint    | Single-Carcinogen                                                   | Single-Carcinogen                                                   | Single-Carcinogen                                                   |
| Predicted Endpoint | Single-Carcinogen                                                   | Single-Carcinogen                                                   | Single-Carcinogen                                                   |
| Distance           | 0.798                                                               | 0.821                                                               | 0.860                                                               |
| Reference          | US FDA (Centre for Drug Eval.& Res./Off. Testing & Res.) Sept. 1997 | US FDA (Centre for Drug Eval.& Res./Off. Testing & Res.) Sept. 1997 | US FDA (Centre for Drug Eval.& Res./Off. Testing & Res.) Sept. 1997 |

## Model Applicability

Unknown features are fingerprint features in the query molecule, but not found in the training set.

1. All properties and OPS components are within expected ranges.

## Feature Contribution

### Top features for positive contribution

| Fingerprint | Bit/Smiles | Feature Structure                                   | Score | Multiple-Carcinogen in training set |
|-------------|------------|-----------------------------------------------------|-------|-------------------------------------|
| SCFP_4      | -973999932 | <br>[*][C@@H]1[*][C@@H]([*])C(=CC1=O)C([*])([*])[*] | 0.610 | 2 out of 2                          |

|                                        |             |                                                                                                                                                          |        |                                     |
|----------------------------------------|-------------|----------------------------------------------------------------------------------------------------------------------------------------------------------|--------|-------------------------------------|
| SCFP_4                                 | -1903488337 | 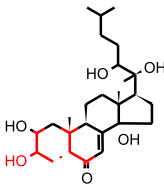<br><chem>[*]C1[*]C([*])([*])C@@H](CC1O)C(=[*])[*]</chem>              | 0.419  | 1 out of 1                          |
| SCFP_4                                 | -1971196727 | <br><chem>[*]C(=CC(=[*])[*])[*]</chem>                                | 0.295  | 5 out of 11                         |
| Top Features for negative contribution |             |                                                                                                                                                          |        |                                     |
| Fingerprint                            | Bit/Smiles  | Feature Structure                                                                                                                                        | Score  | Multiple-Carcinogen in training set |
| SCFP_4                                 | -1043339860 | <br><chem>[*]C([*])([*])[C@H]1C[*]1C1([*])[*]</chem>                  | -0.675 | 4 out of 28                         |
| SCFP_4                                 | -1870530637 | <br><chem>[*]CCC(C)C</chem>                                         | -0.489 | 0 out of 2                          |
| SCFP_4                                 | -511672165  | <br><chem>[*]C([*])([*])[C@H]1C[C@@@]2(O)C(=[*])[*]CC[C@]12C</chem> | -0.489 | 0 out of 2                          |



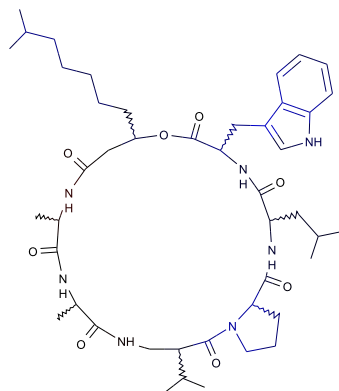

$C_{45}H_{69}N_7O_8$

Molecular Weight: 836.07145

ALogP: 4.986

Rotatable Bonds: 11

Acceptors: 8

Donors: 6

## Model Prediction

Prediction: Single-Carcinogen

Probability: 0.018

Enrichment: 0.048

Bayesian Score: -13.077

Mahalanobis Distance: 20.115

Mahalanobis Distance p-value: 4.33e-011

Prediction: Positive if the Bayesian score is above the estimated best cutoff value from minimizing the false positive and false negative rate.

Probability: The estimated probability that the sample is in the positive category. This assumes that the Bayesian score follows a normal distribution and is different from the prediction using a cutoff.

Enrichment: An estimate of enrichment, that is, the increased likelihood (versus random) of this sample being in the category.

Bayesian Score: The standard Laplacian-modified Bayesian score.

Mahalanobis Distance: The Mahalanobis distance (MD) is the distance to the center of the training data. The larger the MD, the less trustworthy the prediction.

Mahalanobis Distance p-value: The p-value gives the fraction of training data with an MD greater than or equal to the one for the given sample, assuming normally distributed data. The smaller the p-value, the less trustworthy the prediction. For highly non-normal X properties (e.g., fingerprints), the MD p-value is wildly inaccurate.

## Structural Similar Compounds

| Name               | Bromocriptine                                                       | Prednimustine                                                       | Salmeterol                                                          |
|--------------------|---------------------------------------------------------------------|---------------------------------------------------------------------|---------------------------------------------------------------------|
| Structure          |                                                                     |                                                                     |                                                                     |
| Actual Endpoint    | Single-Carcinogen                                                   | Single-Carcinogen                                                   | Single-Carcinogen                                                   |
| Predicted Endpoint | Single-Carcinogen                                                   | Single-Carcinogen                                                   | Single-Carcinogen                                                   |
| Distance           | 1.103                                                               | 1.232                                                               | 1.366                                                               |
| Reference          | US FDA (Centre for Drug Eval.& Res./Off. Testing & Res.) Sept. 1997 | US FDA (Centre for Drug Eval.& Res./Off. Testing & Res.) Sept. 1997 | US FDA (Centre for Drug Eval.& Res./Off. Testing & Res.) Sept. 1997 |

## Model Applicability

Unknown features are fingerprint features in the query molecule, but not found in the training set.

1. Molecular\_Weight out of range. Value: 836.07. Training min, max, mean, SD: 59.067, 654.59, 292.9, 119.1.
2. Num\_H\_Donors out of range. Value: 6. Training min, max, mean, SD: 0, 5, 1.3902, 1.143.
3. OPS PC8 out of range. Value: 5.542. Training min, max, SD, explained variance: -3.3768, 4.2738, 1.554, 0.0358.

## Feature Contribution

| Top features for positive contribution |            |                                       |       |                                     |
|----------------------------------------|------------|---------------------------------------|-------|-------------------------------------|
| Fingerprint                            | Bit/Smiles | Feature Structure                     | Score | Multiple-Carcinogen in training set |
| SCFP_4                                 | -111024397 | <br><chem>*[C]([*])NC(=[*])[*]</chem> | 0.351 | 4 out of 8                          |



| SCFP_4                                 | 1256995004  | 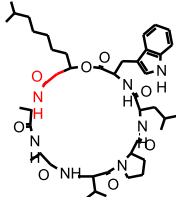<br><chem>[*]CC(=O)N[*]</chem>                     | 0.327  | 10 out of 22                        |
|----------------------------------------|-------------|---------------------------------------------------------------------------------------------------------------------------------------|--------|-------------------------------------|
| SCFP_4                                 | 149003983   | <br><chem>[*]:[c]1:[*]:[*]:[cH]<br/>:[nH]:1</chem> | 0.266  | 11 out of 26                        |
| Top Features for negative contribution |             |                                                                                                                                       |        |                                     |
| Fingerprint                            | Bit/Smiles  | Feature Structure                                                                                                                     | Score  | Multiple-Carcinogen in training set |
| SCFP_4                                 | 1175638033  | <br><chem>[*]CCCCC([*])[*]</chem>                  | -1.165 | 0 out of 7                          |
| SCFP_4                                 | -1272709286 | <br><chem>[*]C([*])C[c]([*]):[<br/>*]</chem>     | -1.157 | 1 out of 17                         |
| SCFP_4                                 | -1343150366 | <br><chem>[*]C1[*][*]CN1C(=[*])<br/>[*]</chem>   | -0.946 | 0 out of 5                          |



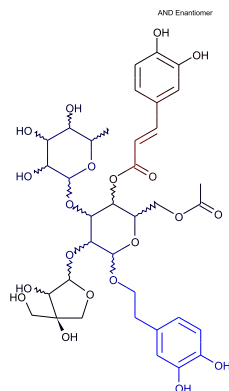

$C_{36}H_{46}O_{20}$

Molecular Weight: 798.73843

ALogP: -0.546

Rotatable Bonds: 16

Acceptors: 20

Donors: 10

## Model Prediction

Prediction: Non-Carcinogen

Probability: 0.139

Enrichment: 0.416

Bayesian Score: -11.931

Mahalanobis Distance: 19.254

Mahalanobis Distance p-value: 8.18e-017

Prediction: Positive if the Bayesian score is above the estimated best cutoff value from minimizing the false positive and false negative rate.

Probability: The estimated probability that the sample is in the positive category. This assumes that the Bayesian score follows a normal distribution and is different from the prediction using a cutoff.

Enrichment: An estimate of enrichment, that is, the increased likelihood (versus random) of this sample being in the category.

Bayesian Score: The standard Laplacian-modified Bayesian score.

Mahalanobis Distance: The Mahalanobis distance (MD) is the distance to the center of the training data. The larger the MD, the less trustworthy the prediction.

Mahalanobis Distance p-value: The p-value gives the fraction of training data with an MD greater than or equal to the one for the given sample, assuming normally distributed data. The smaller the p-value, the less trustworthy the prediction. For highly non-normal X properties (e.g., fingerprints), the MD p-value is wildly inaccurate.

## Structural Similar Compounds

| Name               | Rifampin                                                            | Natamycin                                                           | Netilmicin                                                          |
|--------------------|---------------------------------------------------------------------|---------------------------------------------------------------------|---------------------------------------------------------------------|
| Structure          |                                                                     |                                                                     |                                                                     |
| Actual Endpoint    | Non-Carcinogen                                                      | Non-Carcinogen                                                      | Non-Carcinogen                                                      |
| Predicted Endpoint | Non-Carcinogen                                                      | Non-Carcinogen                                                      | Non-Carcinogen                                                      |
| Distance           | 1.506                                                               | 1.523                                                               | 1.547                                                               |
| Reference          | US FDA (Centre for Drug Eval.& Res./Off. Testing & Res.) Sept. 1997 | US FDA (Centre for Drug Eval.& Res./Off. Testing & Res.) Sept. 1997 | US FDA (Centre for Drug Eval.& Res./Off. Testing & Res.) Sept. 1997 |

## Model Applicability

Unknown features are fingerprint features in the query molecule, but not found in the training set.

1. Num\_H\_Acceptors out of range. Value: 20. Training min, max, mean, SD: 0, 15, 4.1723, 2.348.
2. OPS PC10 out of range. Value: -5.0703. Training min, max, SD, explained variance: -4.2502, 5.657, 1.784, 0.0297.

## Feature Contribution

### Top features for positive contribution

| Fingerprint | Bit/Smiles | Feature Structure                                 | Score | Carcinogen in training set |
|-------------|------------|---------------------------------------------------|-------|----------------------------|
| SCFP_6      | 1590423958 | <br><chem>[*]C([*])C(OC(=O)C=[*])C([*])[*]</chem> | 0.675 | 6 out of 8                 |

|                                        |             |                                                                                                                                                                |        |                            |
|----------------------------------------|-------------|----------------------------------------------------------------------------------------------------------------------------------------------------------------|--------|----------------------------|
| SCFP_6                                 | -1971137145 | <p>AND Enantiomer</p> 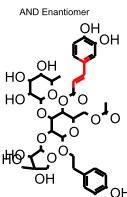 <p>[*]C=C\[c](:[*]):[*]</p>                          | 0.434  | 5 out of 9                 |
| SCFP_6                                 | -1977229858 | <p>AND Enantiomer</p>  <p>[*]C(=[*])C=C\[c](:[cH]:[*]):[cH]:[*]</p>         | 0.425  | 2 out of 3                 |
| Top Features for negative contribution |             |                                                                                                                                                                |        |                            |
| Fingerprint                            | Bit/Smiles  | Feature Structure                                                                                                                                              | Score  | Carcinogen in training set |
| SCFP_6                                 | -1642341584 | <p>AND Enantiomer</p>  <p>[*]CC[c]1:[cH]:[cH]!:[c]([O]):[c]([*]):[cH]:1</p> | -1.271 | 0 out of 8                 |
| SCFP_6                                 | -1211866396 | <p>AND Enantiomer</p>  <p>[*]CC[c]1:[cH]:[cH]!:[*]:[c]([*]):[cH]:1</p>     | -1.101 | 2 out of 25                |
| SCFP_6                                 | -820970991  | <p>AND Enantiomer</p>  <p>[*]COC1OC([*])[*]C([*])C1O[*]</p>               | -0.825 | 0 out of 4                 |

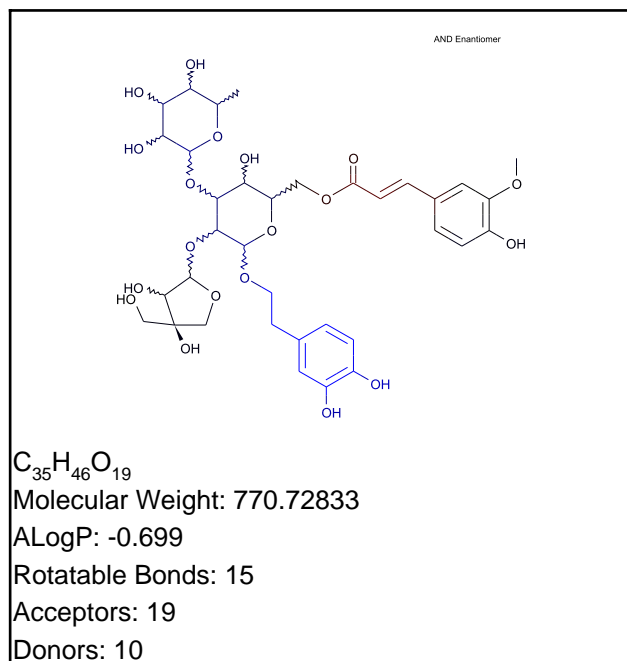

## Model Prediction

Prediction: Non-Carcinogen

Probability: 0.135

Enrichment: 0.405

Bayesian Score: -12.223

Mahalanobis Distance: 18.658

Mahalanobis Distance p-value: 2.73e-015

Prediction: Positive if the Bayesian score is above the estimated best cutoff value from minimizing the false positive and false negative rate.

Probability: The estimated probability that the sample is in the positive category. This assumes that the Bayesian score follows a normal distribution and is different from the prediction using a cutoff.

Enrichment: An estimate of enrichment, that is, the increased likelihood (versus random) of this sample being in the category.

Bayesian Score: The standard Laplacian-modified Bayesian score.

Mahalanobis Distance: The Mahalanobis distance (MD) is the distance to the center of the training data. The larger the MD, the less trustworthy the prediction.

Mahalanobis Distance p-value: The p-value gives the fraction of training data with an MD greater than or equal to the one for the given sample, assuming normally distributed data. The smaller the p-value, the less trustworthy the prediction. For highly non-normal X properties (e.g., fingerprints), the MD p-value is wildly inaccurate.

## Structural Similar Compounds

| Name               | Natamycin                                                                           | Netilmicin                                                                          | Rifampin                                                                            |
|--------------------|-------------------------------------------------------------------------------------|-------------------------------------------------------------------------------------|-------------------------------------------------------------------------------------|
| Structure          | 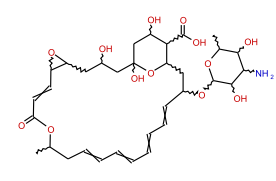 |  |  |
| Actual Endpoint    | Non-Carcinogen                                                                      | Non-Carcinogen                                                                      | Non-Carcinogen                                                                      |
| Predicted Endpoint | Non-Carcinogen                                                                      | Non-Carcinogen                                                                      | Non-Carcinogen                                                                      |
| Distance           | 1.431                                                                               | 1.436                                                                               | 1.443                                                                               |
| Reference          | US FDA (Centre for Drug Eval.& Res./Off. Testing & Res.) Sept. 1997                 | US FDA (Centre for Drug Eval.& Res./Off. Testing & Res.) Sept. 1997                 | US FDA (Centre for Drug Eval.& Res./Off. Testing & Res.) Sept. 1997                 |

## Model Applicability

Unknown features are fingerprint features in the query molecule, but not found in the training set.

1. Num\_H\_Acceptors out of range. Value: 19. Training min, max, mean, SD: 0, 15, 4.1723, 2.348.
2. OPS PC10 out of range. Value: -4.967. Training min, max, SD, explained variance: -4.2502, 5.657, 1.784, 0.0297.

## Feature Contribution

### Top features for positive contribution

| Fingerprint | Bit/Smiles  | Feature Structure                                                                                                | Score | Carcinogen in training set |
|-------------|-------------|------------------------------------------------------------------------------------------------------------------|-------|----------------------------|
| SCFP_6      | -1971137145 | 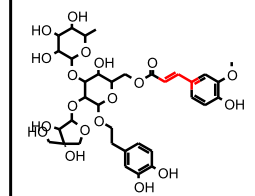<br>[*]C=C\[c]([*]):[*]:[*] | 0.434 | 5 out of 9                 |

|                                        |             |                                                                                                                                                    |        |                            |
|----------------------------------------|-------------|----------------------------------------------------------------------------------------------------------------------------------------------------|--------|----------------------------|
| SCFP_6                                 | -1977229858 | 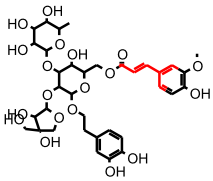<br><chem>[*]C(=[*])C=C[c]([c]([cH])([*])([*])[cH])([*])</chem> | 0.425  | 2 out of 3                 |
| SCFP_6                                 | 1284965536  | <br><chem>[*]OC(=O)C=C[c]([c]([*])):[*]</chem>                  | 0.425  | 2 out of 3                 |
| Top Features for negative contribution |             |                                                                                                                                                    |        |                            |
| Fingerprint                            | Bit/Smiles  | Feature Structure                                                                                                                                  | Score  | Carcinogen in training set |
| SCFP_6                                 | -1642341584 | <br><chem>[*]CC[c]1:[cH]([cH]):[c](O):[c]([*]):[cH]:1</chem>    | -1.271 | 0 out of 8                 |
| SCFP_6                                 | -1211866396 | <br><chem>[*]CC[c]1:[cH]([cH]):[*]:[c]([*]):[cH]:1</chem>     | -1.101 | 2 out of 25                |
| SCFP_6                                 | 2116304939  | <br><chem>[*][c]1:[*]:[cH]([c](O):[c](O):[cH]:1</chem>        | -0.825 | 0 out of 4                 |

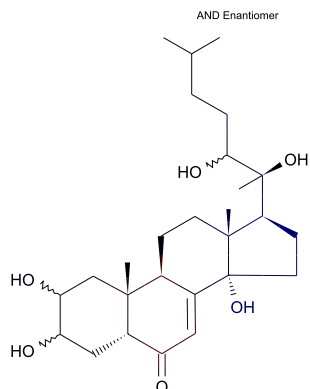
 $C_{27}H_{44}O_6$ 

Molecular Weight: 464.63466

ALogP: 2.489

Rotatable Bonds: 5

Acceptors: 6

Donors: 5

## Model Prediction

Prediction: Non-Carcinogen

Probability: 0.298

Enrichment: 0.893

Bayesian Score: -2.193

Mahalanobis Distance: 16.132

Mahalanobis Distance p-value: 2.72e-009

Prediction: Positive if the Bayesian score is above the estimated best cutoff value from minimizing the false positive and false negative rate.

Probability: The estimated probability that the sample is in the positive category. This assumes that the Bayesian score follows a normal distribution and is different from the prediction using a cutoff.

Enrichment: An estimate of enrichment, that is, the increased likelihood (versus random) of this sample being in the category.

Bayesian Score: The standard Laplacian-modified Bayesian score.

Mahalanobis Distance: The Mahalanobis distance (MD) is the distance to the center of the training data. The larger the MD, the less trustworthy the prediction.

Mahalanobis Distance p-value: The p-value gives the fraction of training data with an MD greater than or equal to the one for the given sample, assuming normally distributed data. The smaller the p-value, the less trustworthy the prediction. For highly non-normal X properties (e.g., fingerprints), the MD p-value is wildly inaccurate.

## Structural Similar Compounds

| Name               | Triamcinolone                                                       | Budesonide                                                          | Beclomethasone                                                      |
|--------------------|---------------------------------------------------------------------|---------------------------------------------------------------------|---------------------------------------------------------------------|
| Structure          |                                                                     |                                                                     |                                                                     |
| Actual Endpoint    | Non-Carcinogen                                                      | Carcinogen                                                          | Non-Carcinogen                                                      |
| Predicted Endpoint | Non-Carcinogen                                                      | Carcinogen                                                          | Non-Carcinogen                                                      |
| Distance           | 0.756                                                               | 0.771                                                               | 0.783                                                               |
| Reference          | US FDA (Centre for Drug Eval.& Res./Off. Testing & Res.) Sept. 1997 | US FDA (Centre for Drug Eval.& Res./Off. Testing & Res.) Sept. 1997 | US FDA (Centre for Drug Eval.& Res./Off. Testing & Res.) Sept. 1997 |

## Model Applicability

Unknown features are fingerprint features in the query molecule, but not found in the training set.

1. All properties and OPS components are within expected ranges.

## Feature Contribution

### Top features for positive contribution

| Fingerprint | Bit/Smiles  | Feature Structure                               | Score | Carcinogen in training set |
|-------------|-------------|-------------------------------------------------|-------|----------------------------|
| SCFP_6      | -1903488337 | <br>[*]C1[*]C([*])([*])C<br>@H1(CC1O)C(=O)C1[*] | 0.603 | 2 out of 2                 |

|                                        |             |                                                                                                                                                          |        |                            |
|----------------------------------------|-------------|----------------------------------------------------------------------------------------------------------------------------------------------------------|--------|----------------------------|
| SCFP_6                                 | 1416226694  | 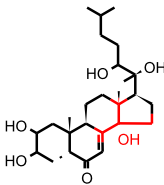<br><chem>[*]C(=[*])([C@]1(O)C[*]1)[*]C1([*])[*]</chem>                | 0.438  | 8 out of 15                |
| SCFP_6                                 | -1971196727 | <br><chem>[*]\C=C\C(=[*])[*]</chem>                                   | 0.361  | 17 out of 36               |
| Top Features for negative contribution |             |                                                                                                                                                          |        |                            |
| Fingerprint                            | Bit/Smiles  | Feature Structure                                                                                                                                        | Score  | Carcinogen in training set |
| SCFP_6                                 | -511672165  | <br><chem>[*]C([*])([*])[C@H]1C C[C@@]2(O)C(=[*])[*] CC[C@]12C</chem> | -1.177 | 0 out of 7                 |
| SCFP_6                                 | -1546614078 | <br><chem>[*][C@H]1CC[C@@](O)(C(=[*])[*])C1([*])[*]</chem>           | -0.825 | 0 out of 4                 |
| SCFP_6                                 | -1870530637 | <br><chem>[*]CCC(C)C</chem>                                         | -0.674 | 0 out of 3                 |



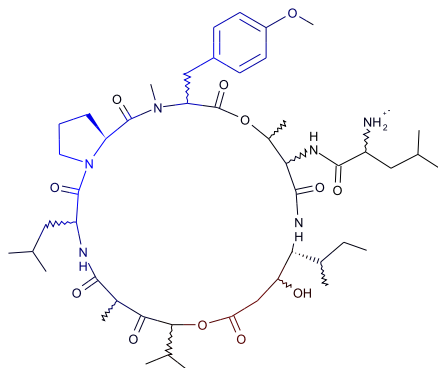

$C_{49}H_{79}N_6O_{12}$

Molecular Weight: 944.18455

ALogP: 3.176

Rotatable Bonds: 13

Acceptors: 12

Donors: 5

## Model Prediction

Prediction: Non-Carcinogen

Probability: 0.099

Enrichment: 0.295

Bayesian Score: -15.536

Mahalanobis Distance: 16.154

Mahalanobis Distance p-value: 2.43e-009

Prediction: Positive if the Bayesian score is above the estimated best cutoff value from minimizing the false positive and false negative rate.

Probability: The estimated probability that the sample is in the positive category. This assumes that the Bayesian score follows a normal distribution and is different from the prediction using a cutoff.

Enrichment: An estimate of enrichment, that is, the increased likelihood (versus random) of this sample being in the category.

Bayesian Score: The standard Laplacian-modified Bayesian score.

Mahalanobis Distance: The Mahalanobis distance (MD) is the distance to the center of the training data. The larger the MD, the less trustworthy the prediction.

Mahalanobis Distance p-value: The p-value gives the fraction of training data with an MD greater than or equal to the one for the given sample, assuming normally distributed data. The smaller the p-value, the less trustworthy the prediction. For highly non-normal X properties (e.g., fingerprints), the MD p-value is wildly inaccurate.

## Structural Similar Compounds

| Name               | Rifabutin                                                           | Erythromycin                                                        | Rifampin                                                            |
|--------------------|---------------------------------------------------------------------|---------------------------------------------------------------------|---------------------------------------------------------------------|
| Structure          |                                                                     |                                                                     |                                                                     |
| Actual Endpoint    | Non-Carcinogen                                                      | Non-Carcinogen                                                      | Non-Carcinogen                                                      |
| Predicted Endpoint | Non-Carcinogen                                                      | Non-Carcinogen                                                      | Non-Carcinogen                                                      |
| Distance           | 1.003                                                               | 1.008                                                               | 1.064                                                               |
| Reference          | US FDA (Centre for Drug Eval.& Res./Off. Testing & Res.) Sept. 1997 | US FDA (Centre for Drug Eval.& Res./Off. Testing & Res.) Sept. 1997 | US FDA (Centre for Drug Eval.& Res./Off. Testing & Res.) Sept. 1997 |

## Model Applicability

Unknown features are fingerprint features in the query molecule, but not found in the training set.

1. Molecular\_Weight out of range. Value: 944.18. Training min, max, mean, SD: 46.068, 847, 305.01, 115.4.

## Feature Contribution

### Top features for positive contribution

| Fingerprint | Bit/Smiles | Feature Structure           | Score | Carcinogen in training set |
|-------------|------------|-----------------------------|-------|----------------------------|
| SCFP_6      | 2140026027 | <br>[*]OC(=O)CC(O)C([*])[*] | 0.784 | 4 out of 4                 |

| SCFP_6                                 | -1109046624 | 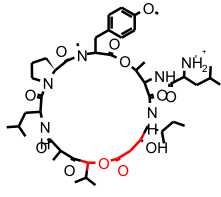<br><chem>[*]C([*])CC(=O)OC([*])</chem>                     | 0.675  | 6 out of 8                 |
|----------------------------------------|-------------|------------------------------------------------------------------------------------------------------------------------------------------------|--------|----------------------------|
| SCFP_6                                 | 276223760   | <br><chem>[*]C([*])OC(=O)[*]</chem>                         | 0.243  | 24 out of 58               |
| Top Features for negative contribution |             |                                                                                                                                                |        |                            |
| Fingerprint                            | Bit/Smiles  | Feature Structure                                                                                                                              | Score  | Carcinogen in training set |
| SCFP_6                                 | -1642341584 | <br><chem>[*]CC[c]1:[cH]:[cH]:[c](O):[c]([*]):[cH]:1</chem> | -1.271 | 0 out of 8                 |
| SCFP_6                                 | -1211866396 | <br><chem>[*]CC[c]1:[cH]:[cH]:[*]:[c]([*]):[cH]:1</chem>   | -1.101 | 2 out of 25                |
| SCFP_6                                 | -1316367761 | <br><chem>[*]CC(N[*])C(=O)N1C[*]</chem>                   | -0.957 | 0 out of 5                 |

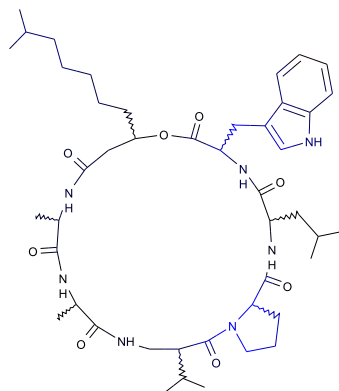
$$\text{C}_{45}\text{H}_{69}\text{N}_7\text{O}_8$$

Molecular Weight: 836.07145

|ALogP: 4.986

Rotatable Bonds: 11

Acceptors: 8

Donors: 6

## Model Prediction

**Prediction: Non-Carcinogen**

Probability: 0.141

Enrichment: 0.423

Bayesian Score: -11.745

Mahalanobis Distance: 16.365

Mahalanobis Distance p-value: 8.3e-010

Prediction: Positive if the Bayesian score is above the estimated best cutoff value from minimizing the false positive and false negative rate.

Probability: The estimated probability that the sample is in the positive category. This assumes that the Bayesian score follows a normal distribution and is different from the prediction using a cutoff.

Enrichment: An estimate of enrichment, that is, the increased likelihood (versus random) of this sample being in the category.  
Bayesian Score: The standard Laplacian-modified Bayesian score.

**Mahalanobis Distance:** The Mahalanobis distance (MD) is the distance to the center of the training data. The larger the MD, the less trustworthy the prediction.

Mahalanobis Distance p-value: The p-value gives the fraction of training data with an MD greater than or equal to the one for the given sample, assuming normally distributed data. The smaller the p-value, the less trustworthy the prediction. For highly non-normal X properties (e.g., fingerprints), the MD p-value is wildly inaccurate.

## Structural Similar Compounds

| Name               | Bromocriptine                                                                       | Erythromycin                                                                        | Rifabutin                                                                           |
|--------------------|-------------------------------------------------------------------------------------|-------------------------------------------------------------------------------------|-------------------------------------------------------------------------------------|
| Structure          | 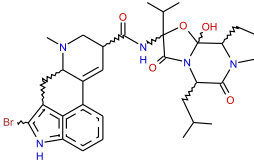 |  |  |
| Actual Endpoint    | Non-Carcinogen                                                                      | Non-Carcinogen                                                                      | Non-Carcinogen                                                                      |
| Predicted Endpoint | Non-Carcinogen                                                                      | Non-Carcinogen                                                                      | Non-Carcinogen                                                                      |
| Distance           | 1.080                                                                               | 1.090                                                                               | 1.122                                                                               |
| Reference          | US FDA (Centre for Drug Eval.& Res./Off. Testing & Res.) Sept. 1997                 | US FDA (Centre for Drug Eval.& Res./Off. Testing & Res.) Sept. 1997                 | US FDA (Centre for Drug Eval.& Res./Off. Testing & Res.) Sept. 1997                 |

## Model Applicability

Unknown features are fingerprint features in the query molecule, but not found in the training set.

1. All properties and OPS components are within expected ranges.

## Feature Contribution

### Top features for positive contribution

| Fingerprint | Bit/Smiles | Feature Structure                                                                                                                                                                                | Score | Carcinogen in training set |
|-------------|------------|--------------------------------------------------------------------------------------------------------------------------------------------------------------------------------------------------|-------|----------------------------|
| SCFP_6      | 1651620003 |  <p> <chem>[*][c]1:[*]:[1]162:</chem><br/> <chem>[cH]:[cH]:[cH]:[cH]:</chem><br/> <chem>[c]:1:2</chem> </p> | 0.643 | 7 out of 10                |

[\*][c]1:[\*]:[\*]2:  
[cH]:[cH]:[cH]:[cH]:  
[c]:1:2

| SCFP_6                                 | -1379673609 | 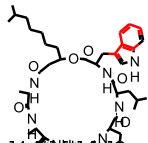<br><chem>[*][c]1:[*]:[N]1:[c]2:[*]:[cH]:[cH]:[cH]:[c]:1:2</chem> | 0.526  | 11 out of 19               |
|----------------------------------------|-------------|------------------------------------------------------------------------------------------------------------------------------------------------------|--------|----------------------------|
| SCFP_6                                 | 1655199790  | <br><chem>[*]1:[*]:[c]2:[cH]:[cH]:[cH]:[c]:2:[nH]:1</chem>        | 0.520  | 5 out of 8                 |
| Top Features for negative contribution |             |                                                                                                                                                      |        |                            |
| Fingerprint                            | Bit/Smiles  | Feature Structure                                                                                                                                    | Score  | Carcinogen in training set |
| SCFP_6                                 | -1946889102 | <br><chem>[*]N1[*][*]C[C@H]1C(=[*])[*]</chem>                     | -0.885 | 1 out of 12                |
| SCFP_6                                 | 2002926168  | <br><chem>[*]CC(NC(=O)C([*])[*])C(=[*])[*]</chem>                | -0.825 | 0 out of 4                 |
| SCFP_6                                 | 306578635   | <br><chem>[*][C@@H]1CCCN1C(=[*])[*]</chem>                      | -0.825 | 0 out of 4                 |

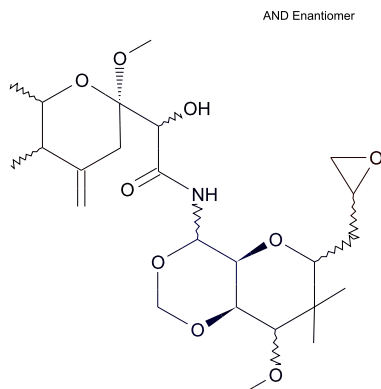

C<sub>24</sub>H<sub>39</sub>NO<sub>9</sub>  
Molecular Weight: 485.56776  
ALogP: 0.267  
Rotatable Bonds: 7  
Acceptors: 9  
Donors: 2

## Model Prediction

**Prediction: Non-Carcinogen**

Probability: 0.300

Enrichment: 0.898

Bayesian Score: -2.113

Mahalanobis Distance: 17.231

Mahalanobis Distance p-value: 8.52e-012

Prediction: Positive if the Bayesian score is above the estimated best cutoff value from minimizing the false positive and false negative rate.

**Probability:** The estimated probability that the sample is in the positive category. This assumes that the Bayesian score follows a normal distribution and is different from the prediction using a cutoff.

Enrichment: An estimate of enrichment, that is, the increased likelihood (versus random) of this sample being in the category.  
Bayesian Score: The standard Laplacian-modified Bayesian score.

**Mahalanobis Distance:** The Mahalanobis distance (MD) is the distance to the center of the training data. The larger the MD, the less trustworthy the prediction.

Mahalanobis Distance p-value: The p-value gives the fraction of training data with an MD greater than or equal to the one for the given sample, assuming normally distributed data. The smaller the p-value, the less trustworthy the prediction. For highly non-normal X properties (e.g., fingerprints), the MD p-value is wildly inaccurate.

## Structural Similar Compounds

| Name               | Lasiocarpine                                                                        | Bacampicillin                                                                       | Budesonide                                                                          |
|--------------------|-------------------------------------------------------------------------------------|-------------------------------------------------------------------------------------|-------------------------------------------------------------------------------------|
| Structure          | 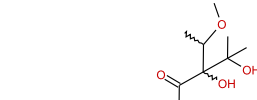 |  |  |
| Actual Endpoint    | Carcinogen                                                                          | Non-Carcinogen                                                                      | Carcinogen                                                                          |
| Predicted Endpoint | Carcinogen                                                                          | Non-Carcinogen                                                                      | Carcinogen                                                                          |
| Distance           | 0.707                                                                               | 0.718                                                                               | 0.760                                                                               |
| Reference          | US FDA (Centre for Drug Eval.& Res./Off. Testing & Res.) Sept. 1997                 | US FDA (Centre for Drug Eval.& Res./Off. Testing & Res.) Sept. 1997                 | US FDA (Centre for Drug Eval.& Res./Off. Testing & Res.) Sept. 1997                 |

## Model Applicability

Unknown features are fingerprint features in the query molecule, but not found in the training set.

1. All properties and OPS components are within expected ranges.

## Feature Contribution

### Top features for positive contribution

| Fingerprint | Bit/Smiles | Feature Structure                                                                                                                  | Score | Carcinogen in training set |
|-------------|------------|------------------------------------------------------------------------------------------------------------------------------------|-------|----------------------------|
| SCFP_6      | -37603133  | 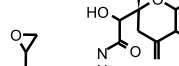<br><chem>[*]C([*])C(OC)C([*])([*])[*]</chem> | 0.561 | 3 out of 4                 |

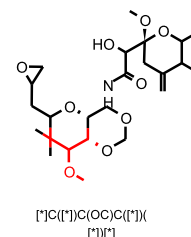

|                                        |             |                                                                                                                                       |        |                            |
|----------------------------------------|-------------|---------------------------------------------------------------------------------------------------------------------------------------|--------|----------------------------|
| SCFP_6                                 | -1905051945 | 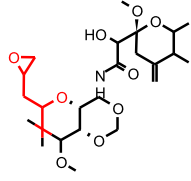<br>[*]OC(CC1CO1)C([*])([*])[*]                    | 0.561  | 3 out of 4                 |
| SCFP_6                                 | 55434585    | <br>[*]C=C(/C([*])([*])C([*])([*])([*])C           | 0.331  | 12 out of 26               |
| Top Features for negative contribution |             |                                                                                                                                       |        |                            |
| Fingerprint                            | Bit/Smiles  | Feature Structure                                                                                                                     | Score  | Carcinogen in training set |
| SCFP_6                                 | -1485821968 | <br>[*]OC1C([*])([*])C([*])C(O1[*])C1OC([*])([*])C | -0.674 | 0 out of 3                 |
| SCFP_6                                 | -712043691  | <br>[*]OCO[*]                                     | -0.278 | 0 out of 1                 |
| SCFP_6                                 | 312169906   | <br>[*]CC1O[*][C@H]([*])C(O1[*])C1(C)C           | -0.278 | 0 out of 1                 |

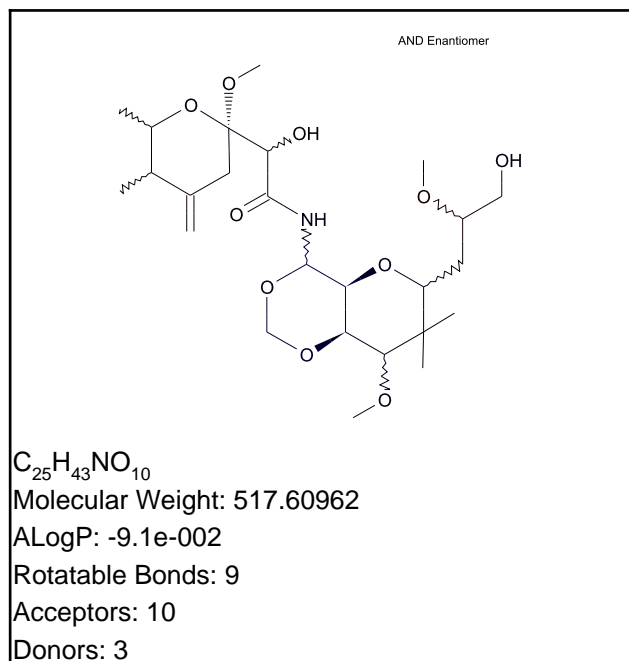

### Model Prediction

Prediction: Non-Carcinogen

Probability: 0.291

Enrichment: 0.871

Bayesian Score: -2.496

Mahalanobis Distance: 17.143

Mahalanobis Distance p-value: 1.37e-011

Prediction: Positive if the Bayesian score is above the estimated best cutoff value from minimizing the false positive and false negative rate.

Probability: The estimated probability that the sample is in the positive category. This assumes that the Bayesian score follows a normal distribution and is different from the prediction using a cutoff.

Enrichment: An estimate of enrichment, that is, the increased likelihood (versus random) of this sample being in the category.

Bayesian Score: The standard Laplacian-modified Bayesian score.

Mahalanobis Distance: The Mahalanobis distance (MD) is the distance to the center of the training data. The larger the MD, the less trustworthy the prediction.

Mahalanobis Distance p-value: The p-value gives the fraction of training data with an MD greater than or equal to the one for the given sample, assuming normally distributed data. The smaller the p-value, the less trustworthy the prediction. For highly non-normal X properties (e.g., fingerprints), the MD p-value is wildly inaccurate.

### Structural Similar Compounds

| Name               | Bacampicillin                                                                       | Lasiocarpine                                                                        | Dipyridamole                                                                        |
|--------------------|-------------------------------------------------------------------------------------|-------------------------------------------------------------------------------------|-------------------------------------------------------------------------------------|
| Structure          | 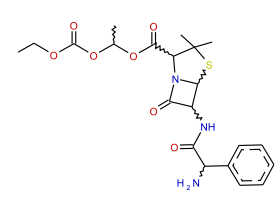 |  |  |
| Actual Endpoint    | Non-Carcinogen                                                                      | Carcinogen                                                                          | Non-Carcinogen                                                                      |
| Predicted Endpoint | Non-Carcinogen                                                                      | Carcinogen                                                                          | Non-Carcinogen                                                                      |
| Distance           | 0.736                                                                               | 0.772                                                                               | 0.853                                                                               |
| Reference          | US FDA (Centre for Drug Eval.& Res./Off. Testing & Res.) Sept. 1997                 | US FDA (Centre for Drug Eval.& Res./Off. Testing & Res.) Sept. 1997                 | US FDA (Centre for Drug Eval.& Res./Off. Testing & Res.) Sept. 1997                 |

### Model Applicability

Unknown features are fingerprint features in the query molecule, but not found in the training set.

1. All properties and OPS components are within expected ranges.

### Feature Contribution

#### Top features for positive contribution

| Fingerprint | Bit/Smiles | Feature Structure                                                                                                     | Score | Carcinogen in training set |
|-------------|------------|-----------------------------------------------------------------------------------------------------------------------|-------|----------------------------|
| SCFP_6      | -37603133  | 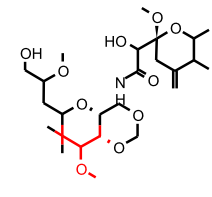<br>[*]C([*])C(OC)C([*])([*])[*] | 0.561 | 3 out of 4                 |

|                                        |             |                                                                                                                                             |        |                            |
|----------------------------------------|-------------|---------------------------------------------------------------------------------------------------------------------------------------------|--------|----------------------------|
| SCFP_6                                 | -1905051945 | 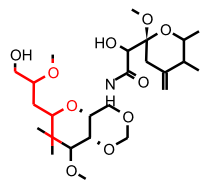 <chem>[*]OC(CC1CO1)C([*])([*])[*]</chem>                 | 0.561  | 3 out of 4                 |
| SCFP_6                                 | 55434585    |  <chem>[*]C=C(/C([*])([*])C([*])([*])([*])[*])C</chem>   | 0.331  | 12 out of 26               |
| Top Features for negative contribution |             |                                                                                                                                             |        |                            |
| Fingerprint                            | Bit/Smiles  | Feature Structure                                                                                                                           | Score  | Carcinogen in training set |
| SCFP_6                                 | -1485821968 |  <chem>[*]OC1C([*])([*])C([*])C(O[*])C1OC([*])[*]</chem> | -0.674 | 0 out of 3                 |
| SCFP_6                                 | 312169906   |  <chem>[*]CC1O[*][*]C@H]([*])C(O[*])C1(C)C</chem>       | -0.278 | 0 out of 1                 |
| SCFP_6                                 | -503761529  |  <chem>[*]C1[*]C([*])([*])CC(=C)C1C</chem>             | -0.278 | 0 out of 1                 |



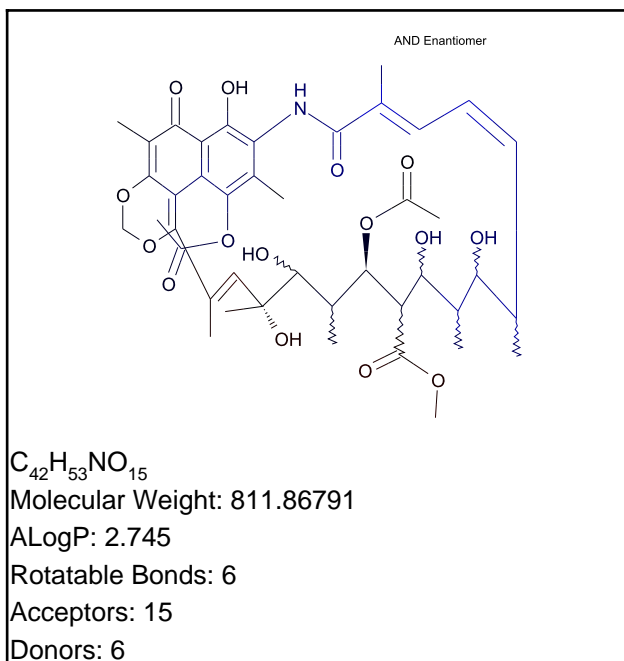

### Model Prediction

Prediction: Non-Carcinogen

Probability: 0.184

Enrichment: 0.550

Bayesian Score: -8.510

Mahalanobis Distance: 16.141

Mahalanobis Distance p-value: 2.6e-009

Prediction: Positive if the Bayesian score is above the estimated best cutoff value from minimizing the false positive and false negative rate.

Probability: The estimated probability that the sample is in the positive category. This assumes that the Bayesian score follows a normal distribution and is different from the prediction using a cutoff.

Enrichment: An estimate of enrichment, that is, the increased likelihood (versus random) of this sample being in the category.

Bayesian Score: The standard Laplacian-modified Bayesian score.

Mahalanobis Distance: The Mahalanobis distance (MD) is the distance to the center of the training data. The larger the MD, the less trustworthy the prediction.

Mahalanobis Distance p-value: The p-value gives the fraction of training data with an MD greater than or equal to the one for the given sample, assuming normally distributed data. The smaller the p-value, the less trustworthy the prediction. For highly non-normal X properties (e.g., fingerprints), the MD p-value is wildly inaccurate.

### Structural Similar Compounds

| Name               | Rifampin                                                                            | Rifabutin                                                                           | Erythromycin                                                                        |
|--------------------|-------------------------------------------------------------------------------------|-------------------------------------------------------------------------------------|-------------------------------------------------------------------------------------|
| Structure          | 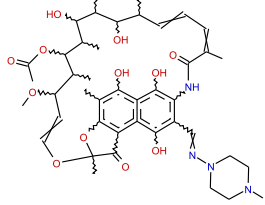 |  |  |
| Actual Endpoint    | Non-Carcinogen                                                                      | Non-Carcinogen                                                                      | Non-Carcinogen                                                                      |
| Predicted Endpoint | Non-Carcinogen                                                                      | Non-Carcinogen                                                                      | Non-Carcinogen                                                                      |
| Distance           | 0.461                                                                               | 0.615                                                                               | 0.829                                                                               |
| Reference          | US FDA (Centre for Drug Eval.& Res./Off. Testing & Res.) Sept. 1997                 | US FDA (Centre for Drug Eval.& Res./Off. Testing & Res.) Sept. 1997                 | US FDA (Centre for Drug Eval.& Res./Off. Testing & Res.) Sept. 1997                 |

### Model Applicability

Unknown features are fingerprint features in the query molecule, but not found in the training set.

1. All properties and OPS components are within expected ranges.

### Feature Contribution

#### Top features for positive contribution

| Fingerprint | Bit/Smiles  | Feature Structure                                                                                                                 | Score | Carcinogen in training set |
|-------------|-------------|-----------------------------------------------------------------------------------------------------------------------------------|-------|----------------------------|
| SCFP_6      | -1104485307 | 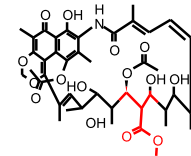<br><chem>*C([*])C(C([*])([*])C(=O)OC</chem> | 0.615 | 5 out of 7                 |

| SCFP_6                                 | 97110830    | 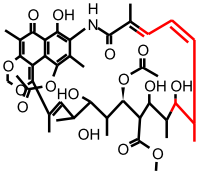<br><chem>[*]C([*])C(C)C=C/C=[*]</chem>                                  | 0.536  | 4 out of 6                 |
|----------------------------------------|-------------|-------------------------------------------------------------------------------------------------------------------------------------------------------------|--------|----------------------------|
| SCFP_6                                 | 1416226694  | <br><chem>[*]C(=[*])(C@)1(O)C[*]<br/>[*]C1([*])[*]</chem>                | 0.438  | 8 out of 15                |
| Top Features for negative contribution |             |                                                                                                                                                             |        |                            |
| Fingerprint                            | Bit/Smiles  | Feature Structure                                                                                                                                           | Score  | Carcinogen in training set |
| SCFP_6                                 | -92192314   | <br><chem>[*]C([*])C=C/C=C/C([*])<br/>[*]</chem>                         | -0.674 | 0 out of 3                 |
| SCFP_6                                 | -2042331623 | <br><chem>[*]C([*])C(C)C(O)C(C(<br/>[*])[*])C(=[*])[*]</chem>           | -0.674 | 0 out of 3                 |
| SCFP_6                                 | 876914673   | <br><chem>[*]O[C@@H](C([*])[*])<br/>C(C)C(O)C([*])([*])<br/>[*]</chem> | -0.674 | 0 out of 3                 |

# Simeprevir

# TOPKAT\_Rat\_Male\_FDA\_None\_vs\_Carcinogen

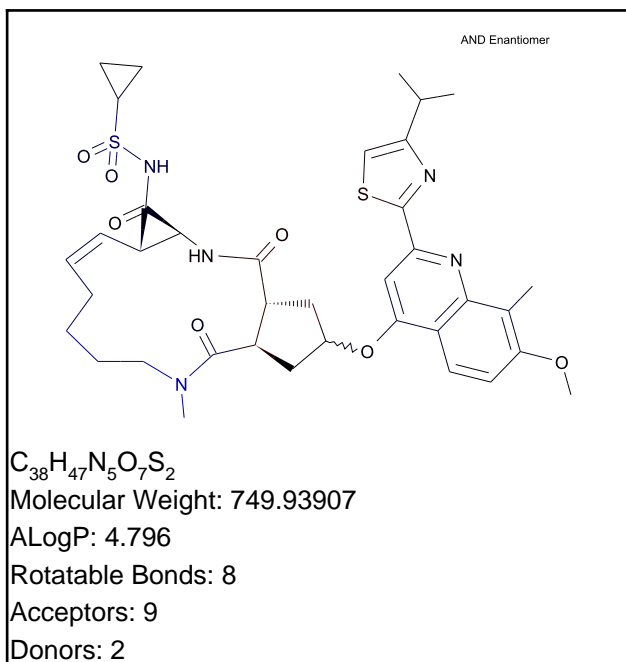

## Model Prediction

Prediction: Non-Carcinogen

Probability: 0.231

Enrichment: 0.690

Bayesian Score: -5.429

Mahalanobis Distance: 20.335

Mahalanobis Distance p-value: 1.2e-019

Prediction: Positive if the Bayesian score is above the estimated best cutoff value from minimizing the false positive and false negative rate.

Probability: The estimated probability that the sample is in the positive category. This assumes that the Bayesian score follows a normal distribution and is different from the prediction using a cutoff.

Enrichment: An estimate of enrichment, that is, the increased likelihood (versus random) of this sample being in the category.

Bayesian Score: The standard Laplacian-modified Bayesian score.

Mahalanobis Distance: The Mahalanobis distance (MD) is the distance to the center of the training data. The larger the MD, the less trustworthy the prediction.

Mahalanobis Distance p-value: The p-value gives the fraction of training data with an MD greater than or equal to the one for the given sample, assuming normally distributed data. The smaller the p-value, the less trustworthy the prediction. For highly non-normal X properties (e.g., fingerprints), the MD p-value is wildly inaccurate.

## Structural Similar Compounds

| Name               | Reserpine                                                                           | Deserpidine                                                                         | Bromocriptine                                                                       |
|--------------------|-------------------------------------------------------------------------------------|-------------------------------------------------------------------------------------|-------------------------------------------------------------------------------------|
| Structure          | 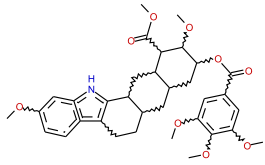 |  |  |
| Actual Endpoint    | Carcinogen                                                                          | Carcinogen                                                                          | Non-Carcinogen                                                                      |
| Predicted Endpoint | Carcinogen                                                                          | Carcinogen                                                                          | Non-Carcinogen                                                                      |
| Distance           | 0.771                                                                               | 0.812                                                                               | 0.842                                                                               |
| Reference          | US FDA (Centre for Drug Eval.& Res./Off. Testing & Res.) Sept. 1997                 | US FDA (Centre for Drug Eval.& Res./Off. Testing & Res.) Sept. 1997                 | US FDA (Centre for Drug Eval.& Res./Off. Testing & Res.) Sept. 1997                 |

## Model Applicability

Unknown features are fingerprint features in the query molecule, but not found in the training set.

- OPS PC5 out of range. Value: 7.7766. Training min, max, SD, explained variance: -4.0702, 6.5927, 2.146, 0.0429.
- OPS PC22 out of range. Value: 3.5288. Training min, max, SD, explained variance: -3.2994, 3.2573, 1.197, 0.0134.

## Feature Contribution

| Top features for positive contribution |             |                                                                                                                                      |       |                            |
|----------------------------------------|-------------|--------------------------------------------------------------------------------------------------------------------------------------|-------|----------------------------|
| Fingerprint                            | Bit/Smiles  | Feature Structure                                                                                                                    | Score | Carcinogen in training set |
| SCFP_6                                 | -1903488337 | 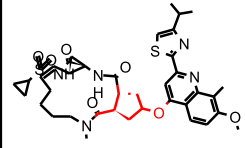<br>[*]C1[*]C([*])([*])C<br>@@H[CC1O)C(=[*])[*] | 0.603 | 2 out of 2                 |

| SCFP_6                                 | -1379673609 | 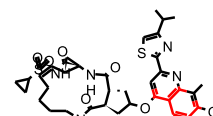<br><chem>[*][c]1:[*]:[*]:[c]2:[*]:[cH]:[cH]:[cH]:[c]:1:2</chem> | 0.526  | 11 out of 19               |
|----------------------------------------|-------------|-----------------------------------------------------------------------------------------------------------------------------------------------------|--------|----------------------------|
| SCFP_6                                 | 1310748454  | <br><chem>[*][c]1:[*]:[*]:[cH]:s:1</chem>                        | 0.437  | 7 out of 13                |
| Top Features for negative contribution |             |                                                                                                                                                     |        |                            |
| Fingerprint                            | Bit/Smiles  | Feature Structure                                                                                                                                   | Score  | Carcinogen in training set |
| SCFP_6                                 | 182902497   | <br><chem>[*]NS(=O)(=O)C1[*]1</chem>                             | -0.825 | 0 out of 4                 |
| SCFP_6                                 | 306578635   | <br><chem>[*]!C@@H]1CCCN1C(=[*])[*]</chem>                     | -0.825 | 0 out of 4                 |
| SCFP_6                                 | 1260369147  | <br><chem>[*]CCC\C=C/[*]</chem>                                | -0.674 | 0 out of 3                 |

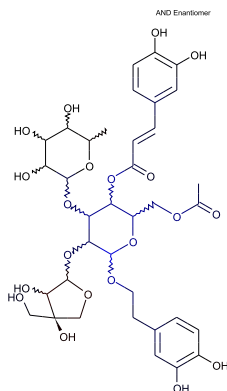
 $C_{36}H_{46}O_{20}$ 

Molecular Weight: 798.73843

ALogP: -0.546

Rotatable Bonds: 16

Acceptors: 20

Donors: 10

## Model Prediction

Prediction: Mild

Probability: 0.063

Enrichment: 0.172

Bayesian Score: -10.100

Mahalanobis Distance: 20.805

Mahalanobis Distance p-value: 9.44e-040

Prediction: Positive if the Bayesian score is above the estimated best cutoff value from minimizing the false positive and false negative rate.

Probability: The estimated probability that the sample is in the positive category. This assumes that the Bayesian score follows a normal distribution and is different from the prediction using a cutoff.

Enrichment: An estimate of enrichment, that is, the increased likelihood (versus random) of this sample being in the category.

Bayesian Score: The standard Laplacian-modified Bayesian score.

Mahalanobis Distance: The Mahalanobis distance (MD) is the distance to the center of the training data. The larger the MD, the less trustworthy the prediction.

Mahalanobis Distance p-value: The p-value gives the fraction of training data with an MD greater than or equal to the one for the given sample, assuming normally distributed data. The smaller the p-value, the less trustworthy the prediction. For highly non-normal X properties (e.g., fingerprints), the MD p-value is wildly inaccurate.

## Structural Similar Compounds

| Name               | 2,2'-Stilbenedisulfonic acid, 4,4'-bis((4-(2-hydroxyethyl)amino-6-(p-sulfoanilino)-s-triazin-2-yl)amino)-, tetrasodium salt | 1,5-Naphthalenedisulfonic acid, 2-(6-(4,6-dichloro-s-triazinyl)methylamino-1-hydroxy-3-sulfonaphthylazo)-                                                                                                          | 2,7-Naphthalenedisulfonic acid, 4-(4,6-dichloro-s-triazin-2-ylamino)-5-hydroxy-6-(2-hydroxy-5-nitrophenylazo)-                                                                                                     |
|--------------------|-----------------------------------------------------------------------------------------------------------------------------|--------------------------------------------------------------------------------------------------------------------------------------------------------------------------------------------------------------------|--------------------------------------------------------------------------------------------------------------------------------------------------------------------------------------------------------------------|
| Structure          |                                                                                                                             |                                                                                                                                                                                                                    |                                                                                                                                                                                                                    |
| Actual Endpoint    | Mild                                                                                                                        | Mild                                                                                                                                                                                                               | Mild                                                                                                                                                                                                               |
| Predicted Endpoint | Mild                                                                                                                        | Mild                                                                                                                                                                                                               | Mild                                                                                                                                                                                                               |
| Distance           | 1.634                                                                                                                       | 1.729                                                                                                                                                                                                              | 1.827                                                                                                                                                                                                              |
| Reference          | MVCB3 MVC-Report. (Stockholm, Sweden) No.1-2, 1972-73. Discontinued. Volume(issue)/page/year: 2,193,1973                    | 28ZPAK "Sbornik Vysledku Toxikologickeho Vysetreni Latek A Pripravku," Marhol d, J.V., Institut Pro Vychovu Vedoucich Pracovniku Chemickeho Prumyclu Praha, Cz echoslovakia, 1972 Volume(issue)/page/year: -,237,1 | 28ZPAK "Sbornik Vysledku Toxikologickeho Vysetreni Latek A Pripravku," Marhol d, J.V., Institut Pro Vychovu Vedoucich Pracovniku Chemickeho Prumyclu Praha, Cz echoslovakia, 1972 Volume(issue)/page/year: -,234,1 |

## Model Applicability

Unknown features are fingerprint features in the query molecule, but not found in the training set.

- OPS PC3 out of range. Value: 9.2098. Training min, max, SD, explained variance: -6.5795, 8.8354, 2.007, 0.0544.
- OPS PC7 out of range. Value: 7.2108. Training min, max, SD, explained variance: -4.7717, 5.3182, 1.704, 0.0392.

## Feature Contribution

### Top features for positive contribution

| Fingerprint | Bit/Smiles | Feature Structure | Score | Moderate_Severe in training set |
|-------------|------------|-------------------|-------|---------------------------------|
|             |            |                   |       |                                 |

|                                        |            |                                                                                                                                                                             |        |                                    |
|----------------------------------------|------------|-----------------------------------------------------------------------------------------------------------------------------------------------------------------------------|--------|------------------------------------|
| FCFP_12                                | 699500266  | <p>AND Enantiomer</p> 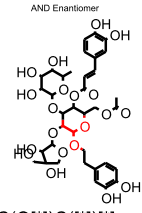 <p>[*]OC(O[*])C([*])[*]</p>                                       | 0.441  | 14 out of 24                       |
| FCFP_12                                | -428284881 | <p>AND Enantiomer</p>  <p>[*]C([*])C(OC(=O)C=[*]<br/> )C([*])[*]</p>                     | 0.384  | 19 out of 35                       |
| FCFP_12                                | -415156552 | <p>AND Enantiomer</p>  <p>[*]C[C@@]1(O)C[*]1[*]C<br/>1[*]</p>                            | 0.338  | 9 out of 17                        |
| Top Features for negative contribution |            |                                                                                                                                                                             |        |                                    |
| Fingerprint                            | Bit/Smiles | Feature Structure                                                                                                                                                           | Score  | Moderate_Severe<br>in training set |
| FCFP_12                                | 205247261  | <p>AND Enantiomer</p>  <p>[*]C([*])OCC[c]([*])<br/>:[*]</p>                             | -0.664 | 1 out of 8                         |
| FCFP_12                                | -145972974 | <p>AND Enantiomer</p>  <p>[*]C([*])OCC[c]1:[cH]<br/>:[cH]:[*]:[c]([*])<br/>:[cH]:1</p> | -0.664 | 1 out of 8                         |

FCFP\_12

2023243256

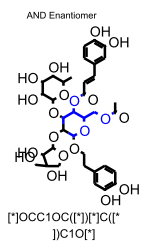

-0.543

0 out of 2

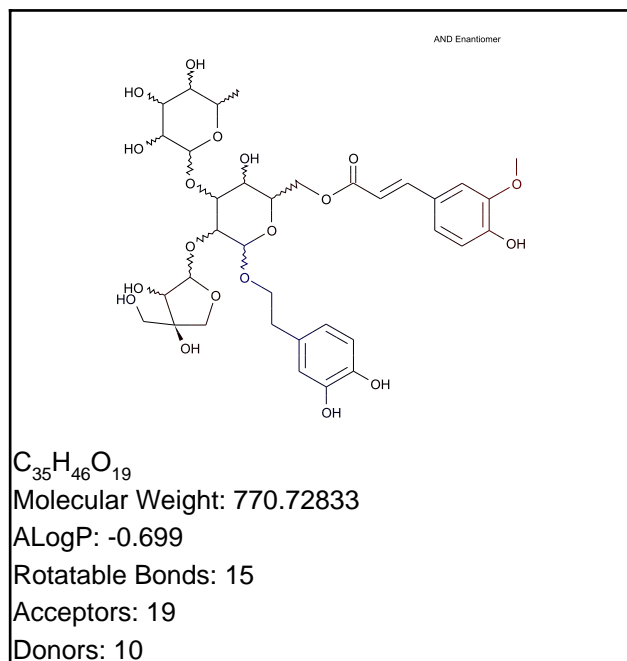

## Model Prediction

Prediction: Mild

Probability: 0.208

Enrichment: 0.564

Bayesian Score: -4.955

Mahalanobis Distance: 20.760

Mahalanobis Distance p-value: 1.58e-039

Prediction: Positive if the Bayesian score is above the estimated best cutoff value from minimizing the false positive and false negative rate.

Probability: The estimated probability that the sample is in the positive category. This assumes that the Bayesian score follows a normal distribution and is different from the prediction using a cutoff.

Enrichment: An estimate of enrichment, that is, the increased likelihood (versus random) of this sample being in the category.

Bayesian Score: The standard Laplacian-modified Bayesian score.

Mahalanobis Distance: The Mahalanobis distance (MD) is the distance to the center of the training data. The larger the MD, the less trustworthy the prediction.

Mahalanobis Distance p-value: The p-value gives the fraction of training data with an MD greater than or equal to the one for the given sample, assuming normally distributed data. The smaller the p-value, the less trustworthy the prediction. For highly non-normal X properties (e.g., fingerprints), the MD p-value is wildly inaccurate.

## Structural Similar Compounds

| Name               | 1,5-Naphthalenedisulfonic acid, 2-(6-(4,6-dichloro-s-triazinyl)methylamino-1-hydroxy-3-sulfonaphthylazo)-                                                                                                             | 2,2'-Stilbenedisulfonic acid, 4,4'-bis((4-(2-hydroxyethyl)amino-6-(p-sulfoanilino)-s-triazin-2-yl)amino)-, tetrasodium salt | 2,7-Naphthalenedisulfonic acid, 4-(4,6-dichloro-s-triazin-2-ylamino)-5-hydroxy-6-(2-hydroxy-5-nitrophenylazo)-                                                                                                        |
|--------------------|-----------------------------------------------------------------------------------------------------------------------------------------------------------------------------------------------------------------------|-----------------------------------------------------------------------------------------------------------------------------|-----------------------------------------------------------------------------------------------------------------------------------------------------------------------------------------------------------------------|
| Structure          | 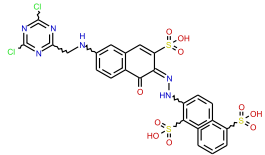                                                                                                                                   |                                          |                                                                                                                                    |
| Actual Endpoint    | Mild                                                                                                                                                                                                                  | Mild                                                                                                                        | Mild                                                                                                                                                                                                                  |
| Predicted Endpoint | Mild                                                                                                                                                                                                                  | Mild                                                                                                                        | Mild                                                                                                                                                                                                                  |
| Distance           | 1.686                                                                                                                                                                                                                 | 1.758                                                                                                                       | 1.780                                                                                                                                                                                                                 |
| Reference          | 28ZPAK "Sbornik Vysledku Toxikologickeho Vysetreni Latek A Pripravku," Marhol d, J.V., Institut Pro Vychovu Vedoucici Pracovniku Chemickeho Prumyclu Praha, Cz echoslovakia, 1972<br>Volume(issue)/page/year: -,237,1 | MVCRB3 MVC-Report. (Stockholm, Sweden) No.1-2, 1972-73. Discontinued. Volume(issue)/page/year: 2,193,1973                   | 28ZPAK "Sbornik Vysledku Toxikologickeho Vysetreni Latek A Pripravku," Marhol d, J.V., Institut Pro Vychovu Vedoucici Pracovniku Chemickeho Prumyclu Praha, Cz echoslovakia, 1972<br>Volume(issue)/page/year: -,234,1 |

## Model Applicability

Unknown features are fingerprint features in the query molecule, but not found in the training set.

1. All properties and OPS components are within expected ranges.

## Feature Contribution

| Top features for positive contribution |            |                   |       |                                 |
|----------------------------------------|------------|-------------------|-------|---------------------------------|
| Fingerprint                            | Bit/Smiles | Feature Structure | Score | Moderate Severe in training set |
|                                        |            |                   |       |                                 |



|                                        |             |                                                                                                                                                      |        |                                 |
|----------------------------------------|-------------|------------------------------------------------------------------------------------------------------------------------------------------------------|--------|---------------------------------|
| FCFP_12                                | 699500266   | 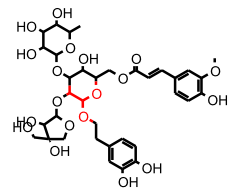<br><chem>[*]OC(O[*])C([*])[*]</chem>                             | 0.441  | 14 out of 24                    |
| FCFP_12                                | -1977641857 | <br><chem>[*][c](:[*]):[c](OC):[cH]:[*]</chem>                    | 0.416  | 18 out of 32                    |
| FCFP_12                                | -2106701143 | <br><chem>[*]OC(COC(=O))C=C[*])C([*])[*]</chem>                   | 0.385  | 1 out of 1                      |
| Top Features for negative contribution |             |                                                                                                                                                      |        |                                 |
| Fingerprint                            | Bit/Smiles  | Feature Structure                                                                                                                                    | Score  | Moderate_Severe in training set |
| FCFP_12                                | -145972974  | <br><chem>[*]C([*])OCC[c]1:[cH]:[cH]:[*]:[c]([*]):[cH]:1</chem> | -0.664 | 1 out of 8                      |
| FCFP_12                                | 205247261   | <br><chem>[*]C([*])OCC[c]([*]):[*]</chem>                       | -0.664 | 1 out of 8                      |

FCFP\_12

-1272709286

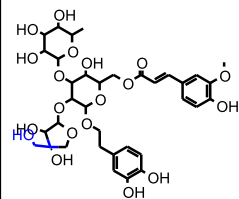

[\*]C([\*])([\*])CO

-0.475

18 out of 82

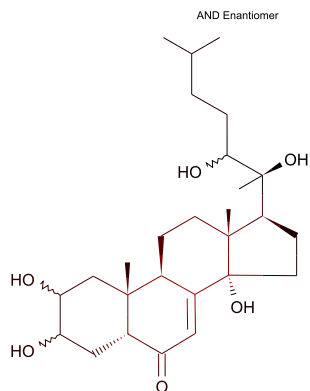
 $C_{27}H_{44}O_6$ 

Molecular Weight: 464.63466

ALogP: 2.489

Rotatable Bonds: 5

Acceptors: 6

Donors: 5

## Model Prediction

Prediction: **Moderate\_Severe**

Probability: 0.535

Enrichment: 1.452

Bayesian Score: 2.989

Mahalanobis Distance: 15.122

Mahalanobis Distance p-value: 4.78e-015

Prediction: Positive if the Bayesian score is above the estimated best cutoff value from minimizing the false positive and false negative rate.

Probability: The estimated probability that the sample is in the positive category. This assumes that the Bayesian score follows a normal distribution and is different from the prediction using a cutoff.

Enrichment: An estimate of enrichment, that is, the increased likelihood (versus random) of this sample being in the category.

Bayesian Score: The standard Laplacian-modified Bayesian score.

Mahalanobis Distance: The Mahalanobis distance (MD) is the distance to the center of the training data. The larger the MD, the less trustworthy the prediction.

Mahalanobis Distance p-value: The p-value gives the fraction of training data with an MD greater than or equal to the one for the given sample, assuming normally distributed data. The smaller the p-value, the less trustworthy the prediction. For highly non-normal X properties (e.g., fingerprints), the MD p-value is wildly inaccurate.

## Structural Similar Compounds

| Name               | Anthraquinone, 2-bromo-1,8-diamino-4,5-dihydroxy-                                                                                                                                                                   | Anthraquinone, 1,4,5,8-tetrahydroxy-                                                                                                                 | C.I. Fluorescent Brightening Agent 24                                                                     |
|--------------------|---------------------------------------------------------------------------------------------------------------------------------------------------------------------------------------------------------------------|------------------------------------------------------------------------------------------------------------------------------------------------------|-----------------------------------------------------------------------------------------------------------|
| Structure          |                                                                                                                                                                                                                     |                                                                                                                                                      |                                                                                                           |
| Actual Endpoint    | Mild                                                                                                                                                                                                                | Mild                                                                                                                                                 | Mild                                                                                                      |
| Predicted Endpoint | Mild                                                                                                                                                                                                                | Mild                                                                                                                                                 | Mild                                                                                                      |
| Distance           | 0.978                                                                                                                                                                                                               | 1.076                                                                                                                                                | 1.146                                                                                                     |
| Reference          | 28ZPAK "Sbornik Vysledku Toxikologickeho Vysetreni Latek A Pripravku," Marhol d, J.V., Institut Pro Vychovu Vedoucich Pracovniku Chemickeho Prumyclu Praha, Cechoslovakia, 1972<br>Volume(issue)/page/year: -,244,1 | 85JCAE "Prehled Prumyslove Toxikologie; Organické Latky," Marhold, J., Prague, Czechoslovakia, Avicenum, 1986<br>Volume(issue)/page/year: -,655,1986 | MVCRB3 MVC-Report. (Stockholm, Sweden) No.1-2, 1972-73. Discontinued. Volume(issue)/page/year: 2,193,1973 |

## Model Applicability

Unknown features are fingerprint features in the query molecule, but not found in the training set.

- OPS PC7 out of range. Value: 5.8386. Training min, max, SD, explained variance: -4.7717, 5.3182, 1.704, 0.0392.

## Feature Contribution

### Top features for positive contribution

| Fingerprint | Bit/Smiles | Feature Structure | Score | Moderate_Severe in training set |
|-------------|------------|-------------------|-------|---------------------------------|
|-------------|------------|-------------------|-------|---------------------------------|

|                                        |            |                                                                                                                                                      |        |                                 |
|----------------------------------------|------------|------------------------------------------------------------------------------------------------------------------------------------------------------|--------|---------------------------------|
| FCFP_12                                | 1544504884 | 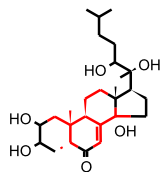 <chem>[*]C[C@@]1(C)[C@@H]([*])C=C2[C@@H]1CC([*])C2([*])[*]</chem> | 0.579  | 4 out of 5                      |
| FCFP_12                                | 436886043  |  <chem>[*]C=C(/C([*])[*])C([*])([*])[*])</chem>                   | 0.503  | 68 out of 113                   |
| FCFP_12                                | -415245925 |  <chem>[*]C[C@@]1(C)[C@@H]([*])C1C1([*])C1([*])</chem>            | 0.498  | 22 out of 36                    |
| Top Features for negative contribution |            |                                                                                                                                                      |        |                                 |
| Fingerprint                            | Bit/Smiles | Feature Structure                                                                                                                                    | Score  | Moderate_Severe in training set |
| FCFP_12                                | 3          |  <chem>[*]O</chem>                                               | -0.234 | 58 out of 204                   |
| FCFP_12                                | 1070061035 |  <chem>[*]C([*])O</chem>                                        | -0.144 | 47 out of 151                   |

|         |   |                                                                                               |       |                |
|---------|---|-----------------------------------------------------------------------------------------------|-------|----------------|
| FCFP_12 | 1 | 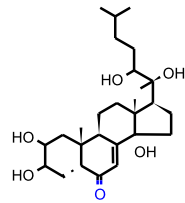<br>[*]O[*] | 0.000 | 269 out of 741 |
|---------|---|-----------------------------------------------------------------------------------------------|-------|----------------|

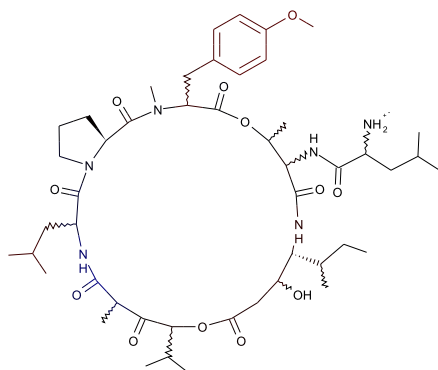
 $C_{49}H_{79}N_6O_{12}$ 

Molecular Weight: 944.18455

ALogP: 3.176

Rotatable Bonds: 13

Acceptors: 12

Donors: 5

## Model Prediction

Prediction: Mild

Probability: 0.331

Enrichment: 0.900

Bayesian Score: -1.964

Mahalanobis Distance: 19.791

Mahalanobis Distance p-value: 8.38e-035

Prediction: Positive if the Bayesian score is above the estimated best cutoff value from minimizing the false positive and false negative rate.

Probability: The estimated probability that the sample is in the positive category. This assumes that the Bayesian score follows a normal distribution and is different from the prediction using a cutoff.

Enrichment: An estimate of enrichment, that is, the increased likelihood (versus random) of this sample being in the category.

Bayesian Score: The standard Laplacian-modified Bayesian score.

Mahalanobis Distance: The Mahalanobis distance (MD) is the distance to the center of the training data. The larger the MD, the less trustworthy the prediction.

Mahalanobis Distance p-value: The p-value gives the fraction of training data with an MD greater than or equal to the one for the given sample, assuming normally distributed data. The smaller the p-value, the less trustworthy the prediction. For highly non-normal X properties (e.g., fingerprints), the MD p-value is wildly inaccurate.

## Structural Similar Compounds

| Name               | 1,5-Naphthalenedisulfonic acid, 2-(6-(4,6-dichloro-s-triazinyl)methylamino-1-hydroxy-3-sulfonaphthylazo)-                                                                                                             | 2,7-Naphthalenedisulfonic acid, 4-(4,6-dichloro-s-triazin-2-ylamino)-5-hydroxy-6-(2-hydroxy-5-nitrophenylazo)-                                                                                                        | Anthraquinone, 3-methoxy-5,4'-iminobis(1-benzamido)-                                                                                                                                                                  |
|--------------------|-----------------------------------------------------------------------------------------------------------------------------------------------------------------------------------------------------------------------|-----------------------------------------------------------------------------------------------------------------------------------------------------------------------------------------------------------------------|-----------------------------------------------------------------------------------------------------------------------------------------------------------------------------------------------------------------------|
| Structure          |                                                                                                                                                                                                                       |                                                                                                                                                                                                                       |                                                                                                                                                                                                                       |
| Actual Endpoint    | Mild                                                                                                                                                                                                                  | Mild                                                                                                                                                                                                                  | Moderate_Severe                                                                                                                                                                                                       |
| Predicted Endpoint | Mild                                                                                                                                                                                                                  | Mild                                                                                                                                                                                                                  | Moderate_Severe                                                                                                                                                                                                       |
| Distance           | 1.212                                                                                                                                                                                                                 | 1.403                                                                                                                                                                                                                 | 1.467                                                                                                                                                                                                                 |
| Reference          | 28ZPAK "Sbornik Vysledku Toxikologickeho Vysetreni Latek A Pripravku," Marhol d, J.V., Institut Pro Vychovu Vedoucich Pracovniku Chemickeho Prumyclu Praha, Cz echoslovakia, 1972<br>Volume(issue)/page/year: -,237,1 | 28ZPAK "Sbornik Vysledku Toxikologickeho Vysetreni Latek A Pripravku," Marhol d, J.V., Institut Pro Vychovu Vedoucich Pracovniku Chemickeho Prumyclu Praha, Cz echoslovakia, 1972<br>Volume(issue)/page/year: -,234,1 | 28ZPAK "Sbornik Vysledku Toxikologickeho Vysetreni Latek A Pripravku," Marhol d, J.V., Institut Pro Vychovu Vedoucich Pracovniku Chemickeho Prumyclu Praha, Cz echoslovakia, 1972<br>Volume(issue)/page/year: -,114,1 |

## Model Applicability

Unknown features are fingerprint features in the query molecule, but not found in the training set.

- OPS PC7 out of range. Value: 6.967. Training min, max, SD, explained variance: -4.7717, 5.3182, 1.704, 0.0392.
- OPS PC23 out of range. Value: 4.2396. Training min, max, SD, explained variance: -3.6258, 3.7453, 0.9755, 0.0128.
- Unknown FCFP\_2 feature: 10: [\*][NH2+][\*]
- Unknown FCFP\_2 feature: 18028531: [\*]C([\*])[NH2+]C
- Unknown FCFP\_2 feature: -1817836174: [\*]CC([NH2+][\*])C(=[\*])[\*]
- Unknown FCFP\_2 feature: 136418580: [\*][NH2+]C

## Feature Contribution

Top features for positive contribution



|         |            |                                                                                                                                     |        |             |
|---------|------------|-------------------------------------------------------------------------------------------------------------------------------------|--------|-------------|
| FCFP_12 | 566058135  | 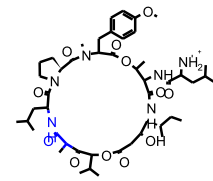<br><chem>[*]NC(=O)C([*])[*]</chem>              | -0.909 | 1 out of 11 |
| FCFP_12 | -950918369 | <br><chem>[*]CC(N([*])[*])C(=O)OC([*])[*]</chem> | -0.543 | 0 out of 2  |



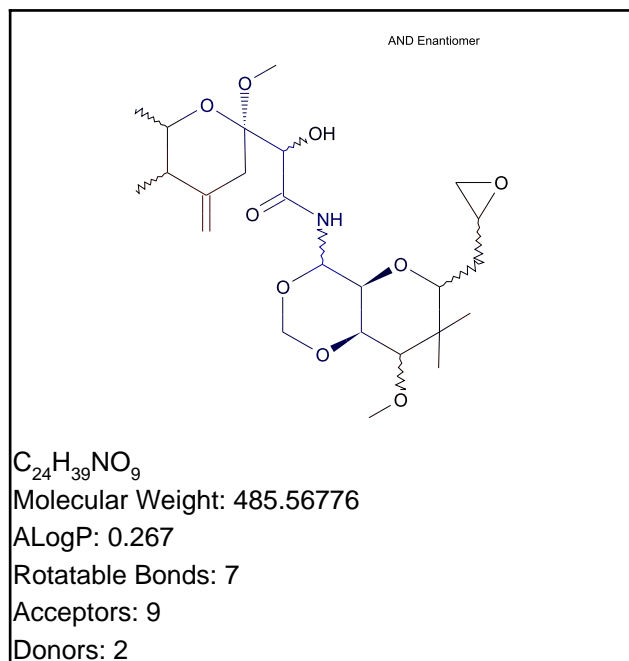

## Model Prediction

Prediction: Mild

Probability: 0.143

Enrichment: 0.390

Bayesian Score: -6.802

Mahalanobis Distance: 13.695

Mahalanobis Distance p-value: 2.47e-010

Prediction: Positive if the Bayesian score is above the estimated best cutoff value from minimizing the false positive and false negative rate.

Probability: The estimated probability that the sample is in the positive category. This assumes that the Bayesian score follows a normal distribution and is different from the prediction using a cutoff.

Enrichment: An estimate of enrichment, that is, the increased likelihood (versus random) of this sample being in the category.

Bayesian Score: The standard Laplacian-modified Bayesian score.

Mahalanobis Distance: The Mahalanobis distance (MD) is the distance to the center of the training data. The larger the MD, the less trustworthy the prediction.

Mahalanobis Distance p-value: The p-value gives the fraction of training data with an MD greater than or equal to the one for the given sample, assuming normally distributed data. The smaller the p-value, the less trustworthy the prediction. For highly non-normal X properties (e.g., fingerprints), the MD p-value is wildly inaccurate.

## Structural Similar Compounds

| Name               | Pregna-1,4-diene-3,20-dione, 21-(acetyloxy)-11-hydroxy-6-methyl-17- (1-oxopropoxy)-, (6- $\alpha$ ,11- $\beta$ )-                                                                | 2-Anthracenesulfonic acid, 1-amino-9,10-dihydro-9,10-dioxo-4-(2,4,6-trimethylanilino)-, monosodium salt                                             | Benzenesulfonic acid, 2,2'-(1,4-anthraquinonylenediimino)bis(5-methyl-, disodium salt                                                               |
|--------------------|----------------------------------------------------------------------------------------------------------------------------------------------------------------------------------|-----------------------------------------------------------------------------------------------------------------------------------------------------|-----------------------------------------------------------------------------------------------------------------------------------------------------|
| Structure          | 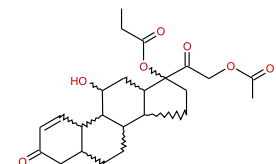                                                                                              |                                                                  |                                                                  |
| Actual Endpoint    | Mild                                                                                                                                                                             | Mild                                                                                                                                                | Mild                                                                                                                                                |
| Predicted Endpoint | Mild                                                                                                                                                                             | Mild                                                                                                                                                | Mild                                                                                                                                                |
| Distance           | 0.815                                                                                                                                                                            | 0.852                                                                                                                                               | 0.951                                                                                                                                               |
| Reference          | YACHDS Yakuri to Chiryo. Pharmacology and Therapeutics. (Raifu Saiensu Shup pan K.K., 2-5-13, Yaesu, Chuo-ku, Tokyo 104, Japan) V.1-1972- Volume(issue) /page/year: 19,3103,1991 | 85JCAE "Prehled Prumyslove Toxikologie; Organicke Latky," Marhold, J., Prague , Czechoslovakia, Avicenum, 1986 Volume(issue)/page/year: -,1327,1986 | 85JCAE "Prehled Prumyslove Toxikologie; Organicke Latky," Marhold, J., Prague , Czechoslovakia, Avicenum, 1986 Volume(issue)/page/year: -,1330,1986 |

## Model Applicability

Unknown features are fingerprint features in the query molecule, but not found in the training set.

- OPS PC23 out of range. Value: 5.354. Training min, max, SD, explained variance: -3.6258, 3.7453, 0.9755, 0.0128.
- Unknown FCFP\_2 feature: 699559848: [\*]NC(O[\*])C([\*])[\*]

## Feature Contribution

| Top features for positive contribution |            |                   |       |                                 |
|----------------------------------------|------------|-------------------|-------|---------------------------------|
| Fingerprint                            | Bit/Smiles | Feature Structure | Score | Moderate_Severe in training set |
|                                        |            |                   |       |                                 |

|                                        |             |                                                                                                                                             |        |                                 |
|----------------------------------------|-------------|---------------------------------------------------------------------------------------------------------------------------------------------|--------|---------------------------------|
| FCFP_12                                | 436886043   | 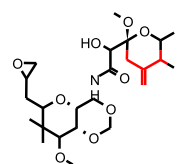<br><chem>[*]C=C(/C([*])([*])C([*])([*])([*])</chem>     | 0.503  | 68 out of 113                   |
| FCFP_12                                | -415245925  | <br><chem>[*]C[C@]1(C)[C@H]([*])([*])C1([*])([*])</chem> | 0.498  | 22 out of 36                    |
| FCFP_12                                | -1218582944 | <br><chem>[*]C1[*]C([*])([*])CC(=C)C1C</chem>            | 0.385  | 1 out of 1                      |
| Top Features for negative contribution |             |                                                                                                                                             |        |                                 |
| Fingerprint                            | Bit/Smiles  | Feature Structure                                                                                                                           | Score  | Moderate_Severe in training set |
| FCFP_12                                | 1327594201  | <br><chem>[*]Cc([*])([*])C([*])([*])</chem>             | -1.260 | 0 out of 7                      |
| FCFP_12                                | -885550502  | <br><chem>[*]C([*])NC(=[*])[*]</chem>                  | -1.050 | 2 out of 21                     |

|         |           |                                                                                                                        |        |             |
|---------|-----------|------------------------------------------------------------------------------------------------------------------------|--------|-------------|
| FCFP_12 | 566058135 | 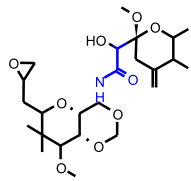<br><chem>[*]NC(=O)C([*])[*]</chem> | -0.909 | 1 out of 11 |
|---------|-----------|------------------------------------------------------------------------------------------------------------------------|--------|-------------|

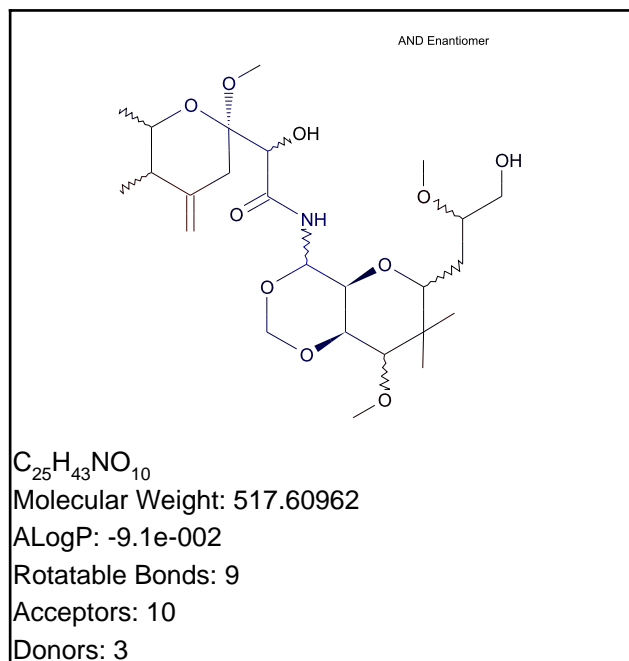

## Model Prediction

Prediction: Mild

Probability: 0.122

Enrichment: 0.332

Bayesian Score: -7.509

Mahalanobis Distance: 14.139

Mahalanobis Distance p-value: 1.02e-011

Prediction: Positive if the Bayesian score is above the estimated best cutoff value from minimizing the false positive and false negative rate.

Probability: The estimated probability that the sample is in the positive category. This assumes that the Bayesian score follows a normal distribution and is different from the prediction using a cutoff.

Enrichment: An estimate of enrichment, that is, the increased likelihood (versus random) of this sample being in the category.

Bayesian Score: The standard Laplacian-modified Bayesian score.

Mahalanobis Distance: The Mahalanobis distance (MD) is the distance to the center of the training data. The larger the MD, the less trustworthy the prediction.

Mahalanobis Distance p-value: The p-value gives the fraction of training data with an MD greater than or equal to the one for the given sample, assuming normally distributed data. The smaller the p-value, the less trustworthy the prediction. For highly non-normal X properties (e.g., fingerprints), the MD p-value is wildly inaccurate.

## Structural Similar Compounds

| Name               | Benzenesulfonic acid, 2,2'-(1,4-anthraquinonylenediimino)bis(5-methyl-, disodium salt                                                              | 2-Anthracenesulfonic acid, 1-amino-9,10-dihydro-9,10-dioxo-4-(2,4,6-trimethylanilino)-, monosodium salt                                            | Fumaric acid, bis(3-allyloxy-2-hydroxypropyl) ester                                                                                               |
|--------------------|----------------------------------------------------------------------------------------------------------------------------------------------------|----------------------------------------------------------------------------------------------------------------------------------------------------|---------------------------------------------------------------------------------------------------------------------------------------------------|
| Structure          | 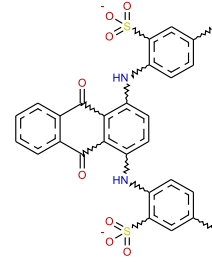                                                                |                                                                 |                                                                |
| Actual Endpoint    | Mild                                                                                                                                               | Mild                                                                                                                                               | Mild                                                                                                                                              |
| Predicted Endpoint | Mild                                                                                                                                               | Mild                                                                                                                                               | Mild                                                                                                                                              |
| Distance           | 0.927                                                                                                                                              | 1.010                                                                                                                                              | 1.028                                                                                                                                             |
| Reference          | 85JCAE "Prehled Prumyslove Toxikologie; Organické Latky," Marhold, J., Prague, Czechoslovakia, Avicenum, 1986 Volume(issue)/page/year: -,1330,1986 | 85JCAE "Prehled Prumyslove Toxikologie; Organické Latky," Marhold, J., Prague, Czechoslovakia, Avicenum, 1986 Volume(issue)/page/year: -,1327,1986 | 85JCAE "Prehled Prumyslove Toxikologie; Organické Latky," Marhold, J., Prague, Czechoslovakia, Avicenum, 1986 Volume(issue)/page/year: -,646,1986 |

## Model Applicability

Unknown features are fingerprint features in the query molecule, but not found in the training set.

1. OPS PC7 out of range. Value: 5.4806. Training min, max, SD, explained variance: -4.7717, 5.3182, 1.704, 0.0392.
2. OPS PC23 out of range. Value: 4.0785. Training min, max, SD, explained variance: -3.6258, 3.7453, 0.9755, 0.0128.
3. Unknown FCFP\_2 feature: 699559848: [\*]NC(O[\*])C([\*])[\*]

## Feature Contribution

### Top features for positive contribution

| Fingerprint | Bit/Smiles | Feature Structure | Score | Moderate_Severe in training set |
|-------------|------------|-------------------|-------|---------------------------------|
|             |            |                   |       |                                 |

|                                        |             |                                                                                                                                            |        |                                 |
|----------------------------------------|-------------|--------------------------------------------------------------------------------------------------------------------------------------------|--------|---------------------------------|
| FCFP_12                                | 436886043   | 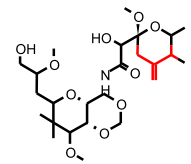<br><chem>[*]C=C(/C([*])([*])C([*])([*])X[*])</chem>    | 0.503  | 68 out of 113                   |
| FCFP_12                                | -415245925  | <br><chem>[*]C[C@]1(C)C(C@@H([*])X[*])C1([*])[*]</chem> | 0.498  | 22 out of 36                    |
| FCFP_12                                | -1218582944 | <br><chem>[*]C1[*]C([*])([*])CC(=C)C1C</chem>           | 0.385  | 1 out of 1                      |
| Top Features for negative contribution |             |                                                                                                                                            |        |                                 |
| Fingerprint                            | Bit/Smiles  | Feature Structure                                                                                                                          | Score  | Moderate_Severe in training set |
| FCFP_12                                | 1327594201  | <br><chem>[*]CC(O[*])(O[*])C([*])X[*]</chem>           | -1.260 | 0 out of 7                      |
| FCFP_12                                | -885550502  | <br><chem>[*]C([*])NC(=[*])[*]</chem>                 | -1.050 | 2 out of 21                     |

FCFP\_12

566058135

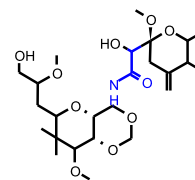

-0.909

1 out of 11

[\*]NC(=O)C([\*])([\*])

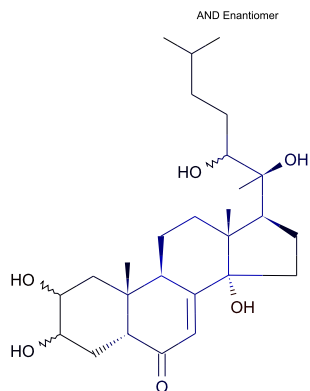
 $C_{27}H_{44}O_6$ 

Molecular Weight: 464.63466

ALogP: 2.489

Rotatable Bonds: 5

Acceptors: 6

Donors: 5

## Model Prediction

Prediction: Moderate

Probability: 0.265

Enrichment: 0.599

Bayesian Score: -6.924

Mahalanobis Distance: 14.170

Mahalanobis Distance p-value: 3.38e-013

Prediction: Positive if the Bayesian score is above the estimated best cutoff value from minimizing the false positive and false negative rate.

Probability: The estimated probability that the sample is in the positive category. This assumes that the Bayesian score follows a normal distribution and is different from the prediction using a cutoff.

Enrichment: An estimate of enrichment, that is, the increased likelihood (versus random) of this sample being in the category.

Bayesian Score: The standard Laplacian-modified Bayesian score.

Mahalanobis Distance: The Mahalanobis distance (MD) is the distance to the center of the training data. The larger the MD, the less trustworthy the prediction.

Mahalanobis Distance p-value: The p-value gives the fraction of training data with an MD greater than or equal to the one for the given sample, assuming normally distributed data. The smaller the p-value, the less trustworthy the prediction. For highly non-normal X properties (e.g., fingerprints), the MD p-value is wildly inaccurate.

## Structural Similar Compounds

| Name               | Benzenesulfonamide, 4-amino-N-(5,6-dimethoxy-4-pyrimidinyl)- | 1,2-Ethanediamine, N-(2-aminoethyl)-N'-(2-((2-aminoethyl)amino)ethyl)-                                                                            | Anthraquinone, 3-methoxy-5,4'-iminobis(1-benzamido)-                                                                                                                                                             |
|--------------------|--------------------------------------------------------------|---------------------------------------------------------------------------------------------------------------------------------------------------|------------------------------------------------------------------------------------------------------------------------------------------------------------------------------------------------------------------|
| Structure          |                                                              |                                                                                                                                                   |                                                                                                                                                                                                                  |
| Actual Endpoint    | Moderate                                                     | Severe                                                                                                                                            | Moderate                                                                                                                                                                                                         |
| Predicted Endpoint | Moderate                                                     | Severe                                                                                                                                            | Moderate                                                                                                                                                                                                         |
| Distance           | 1.387                                                        | 1.389                                                                                                                                             | 1.406                                                                                                                                                                                                            |
| Reference          | FCTXAV 14,307,76                                             | 85JCAE "Prehled Prumyslove Toxikologie; Organické Latky," Marhold, J., Prague, Czechoslovakia, Avicenum, 1986 Volume(issue)/page/year: -,446,1986 | 28ZPAK "Sbornik Vysledku Toxikologickeho Vysetreni Latek A Pripravku," Marhold, J.V., Institut Pro Vychovu Vedoucich Pracovniku Chemického Prumyslu Praha, Czechoslovakia, 1972 Volume(issue)/page/year: -,114,1 |

## Model Applicability

Unknown features are fingerprint features in the query molecule, but not found in the training set.

- OPS PC13 out of range. Value: -3.5275. Training min, max, SD, explained variance: -3.4031, 3.5966, 1.166, 0.0215.

## Feature Contribution

### Top features for positive contribution

| Fingerprint | Bit/Smiles | Feature Structure | Score | Severe in training set |
|-------------|------------|-------------------|-------|------------------------|
|-------------|------------|-------------------|-------|------------------------|

|                                        |             |                                                                                                                                                           |        |                        |
|----------------------------------------|-------------|-----------------------------------------------------------------------------------------------------------------------------------------------------------|--------|------------------------|
| SCFP_12                                | -1546614078 | 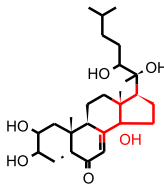<br><chem>[*]C@H]1CC[C@@](O)(C(=[*])[*])C1([*])[*]</chem>               | 0.366  | 1 out of 1             |
| SCFP_12                                | -1971196727 | <br><chem>[*]C(=CC(=[*])[*])[*]</chem>                                 | 0.263  | 23 out of 45           |
| SCFP_12                                | 1416226694  | <br><chem>[*]C(=[*])(C@]1(O)C[*]I[*]C1([*])[*]</chem>                  | 0.198  | 4 out of 8             |
| Top Features for negative contribution |             |                                                                                                                                                           |        |                        |
| Fingerprint                            | Bit/Smiles  | Feature Structure                                                                                                                                         | Score  | Severe in training set |
| SCFP_12                                | 55434585    | <br><chem>[*]C=C(C([*])[*])C([*])([*])[*]</chem>                      | -0.948 | 9 out of 64            |
| SCFP_12                                | -608397454  | <br><chem>[*]C[C@@]1(C)C@H]([*])[*]C=C2[C@@H]1CC[*]C2([*])[*]</chem> | -0.936 | 0 out of 4             |



SCFP\_12

-415245925

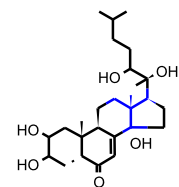

[\*]C[C@]1(C)[C@@H]([\*]  
)[\*][\*]C1([\*])[\*]

-0.796

4 out of 26

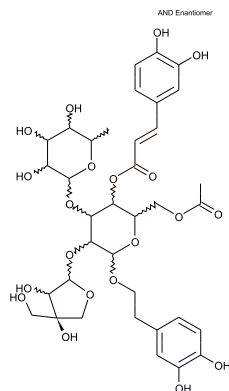
 $C_{36}H_{46}O_{20}$ 

Molecular Weight: 798.73843

ALogP: -0.546

Rotatable Bonds: 16

Acceptors: 20

Donors: 10

## Model Prediction

**Prediction: Irritant**

Probability: 0.978

Enrichment: 1.062

Bayesian Score: -0.216

Mahalanobis Distance: 20.746

Mahalanobis Distance p-value: 8.71e-041

Prediction: Positive if the Bayesian score is above the estimated best cutoff value from minimizing the false positive and false negative rate.

Probability: The estimated probability that the sample is in the positive category. This assumes that the Bayesian score follows a normal distribution and is different from the prediction using a cutoff.

Enrichment: An estimate of enrichment, that is, the increased likelihood (versus random) of this sample being in the category.

Bayesian Score: The standard Laplacian-modified Bayesian score.

Mahalanobis Distance: The Mahalanobis distance (MD) is the distance to the center of the training data. The larger the MD, the less trustworthy the prediction.

Mahalanobis Distance p-value: The p-value gives the fraction of training data with an MD greater than or equal to the one for the given sample, assuming normally distributed data. The smaller the p-value, the less trustworthy the prediction. For highly non-normal X properties (e.g., fingerprints), the MD p-value is wildly inaccurate.

## Structural Similar Compounds

| Name               | 2,2'-Stilbenedisulfonic acid, 4,4'-bis((4-(2-hydroxyethyl)amino-6-(p-sulfoanilino)-s-triazin-2-yl)amino)-, tetrasodium salt | Amipurimycin, hydrate                                                                                                                                                                | 1,5-Naphthalenedisulfonic acid, 2-(6-(4,6-dichloro-s-triazinyl)methylamino-1-hydroxy-3-sulfonaphthylazo)-                                                                                                        |
|--------------------|-----------------------------------------------------------------------------------------------------------------------------|--------------------------------------------------------------------------------------------------------------------------------------------------------------------------------------|------------------------------------------------------------------------------------------------------------------------------------------------------------------------------------------------------------------|
| Structure          |                                                                                                                             |                                                                                                                                                                                      |                                                                                                                                                                                                                  |
| Actual Endpoint    | Irritant                                                                                                                    | Irritant                                                                                                                                                                             | Irritant                                                                                                                                                                                                         |
| Predicted Endpoint | Non-Irritant                                                                                                                | Non-Irritant                                                                                                                                                                         | Non-Irritant                                                                                                                                                                                                     |
| Distance           | 1.673                                                                                                                       | 1.687                                                                                                                                                                                | 1.704                                                                                                                                                                                                            |
| Reference          | MVCB3 MVC-Report. (Stockholm, Sweden) No.1-2, 1972-73. Discontinued. Volume(issue)/page/year: 2,193,1973                    | JANTAJ Journal of Antibiotics. (Japan Antibiotics Research Assoc., 2-20-8 Kamiosaki, Shinagawa-ku, Tokyo, 141, Japan) V.2-5, 1948-52; V.21- 1968- Volume(issue)/page/year: 30,1,1977 | 28ZPAK "Sbornik Vysledku Toxikologickeho Vysetreni Latek A Pripravku," Marhol d, J.V., Institut Pro Vychovu Vedoucic Pracovniku Chemickeho Prumyслу Praha, Czechoslovakia, 1972 Volume(issue)/page/year: -,237,1 |

## Model Applicability

Unknown features are fingerprint features in the query molecule, but not found in the training set.

- OPS PC3 out of range. Value: 10.001. Training min, max, SD, explained variance: -8.0454, 9.6402, 2.076, 0.0545.

## Feature Contribution

| Top features for positive contribution |            |                   |       |                          |
|----------------------------------------|------------|-------------------|-------|--------------------------|
| Fingerprint                            | Bit/Smiles | Feature Structure | Score | Irritant in training set |
|                                        |            |                   |       |                          |

| FCFP_12                                | -1251367201 | <p>AND Enantiomer</p> 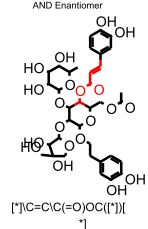 <chem>[*]C=C(C(=O)OC([*])([*])[*])</chem>                 | 0.086  | 31 out of 31             |
|----------------------------------------|-------------|---------------------------------------------------------------------------------------------------------------------------------------------------------------------|--------|--------------------------|
| FCFP_12                                | 654335567   | <p>AND Enantiomer</p>  <chem>[*]OC(COC(=O)[*])([*])C([*])([*])</chem>            | 0.086  | 29 out of 29             |
| FCFP_12                                | -415156552  | <p>AND Enantiomer</p>  <chem>[*]C[C@@]1(O)C([*])C1[*]</chem>                     | 0.085  | 27 out of 27             |
| Top Features for negative contribution |             |                                                                                                                                                                     |        |                          |
| Fingerprint                            | Bit/Smiles  | Feature Structure                                                                                                                                                   | Score  | Irritant in training set |
| FCFP_12                                | 949015626   | <p>AND Enantiomer</p>  <chem>[*]C[c]1:[cH]:[*]C([*])C([*]):[c](O):[cH]:1</chem> | -0.222 | 2 out of 3               |
| FCFP_12                                | -204034463  | <p>AND Enantiomer</p>  <chem>[*][c]1:[*]:[cH]:1([*])(O):[c](O):[cH]:1</chem>   | -0.222 | 2 out of 3               |

|         |   |                                                                                                                       |        |                |
|---------|---|-----------------------------------------------------------------------------------------------------------------------|--------|----------------|
| FCFP_12 | 7 | <p>AND Enantiomer</p> 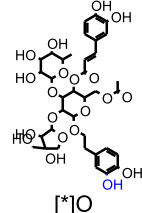 <p>[*]O</p> | -0.118 | 104 out of 128 |
|---------|---|-----------------------------------------------------------------------------------------------------------------------|--------|----------------|

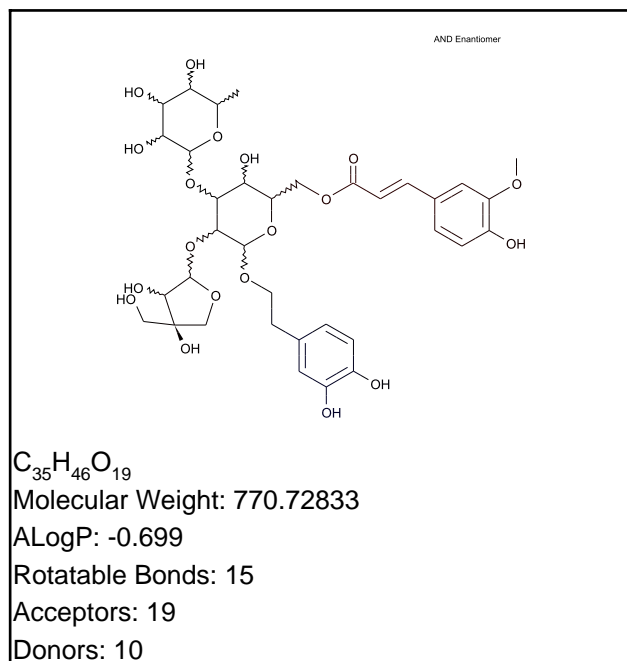

## Model Prediction

Prediction: Irritant

Probability: 0.996

Enrichment: 1.082

Bayesian Score: 0.219

Mahalanobis Distance: 20.464

Mahalanobis Distance p-value: 2.95e-039

Prediction: Positive if the Bayesian score is above the estimated best cutoff value from minimizing the false positive and false negative rate.

Probability: The estimated probability that the sample is in the positive category. This assumes that the Bayesian score follows a normal distribution and is different from the prediction using a cutoff.

Enrichment: An estimate of enrichment, that is, the increased likelihood (versus random) of this sample being in the category.

Bayesian Score: The standard Laplacian-modified Bayesian score.

Mahalanobis Distance: The Mahalanobis distance (MD) is the distance to the center of the training data. The larger the MD, the less trustworthy the prediction.

Mahalanobis Distance p-value: The p-value gives the fraction of training data with an MD greater than or equal to the one for the given sample, assuming normally distributed data. The smaller the p-value, the less trustworthy the prediction. For highly non-normal X properties (e.g., fingerprints), the MD p-value is wildly inaccurate.

## Structural Similar Compounds

| Name               | Amipurimycin, hydrate                                                                                                                                                                 | 1,5-Naphthalenedisulfonic acid, 2-(6-(4,6-dichloro-s-triazinyl)methylamino-1-hydroxy-3-sulfonaphthylazo)-                                                                                                        | 2,7-Naphthalenedisulfonic acid, 4-(4,6-dichloro-s-triazin-2-ylamino)-5-hydroxy-6-(2-hydroxy-5-nitrophenylazo)-                                                                                                   |
|--------------------|---------------------------------------------------------------------------------------------------------------------------------------------------------------------------------------|------------------------------------------------------------------------------------------------------------------------------------------------------------------------------------------------------------------|------------------------------------------------------------------------------------------------------------------------------------------------------------------------------------------------------------------|
| Structure          | 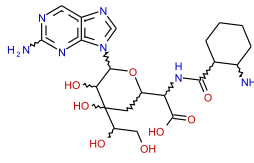                                                                                                   |                                                                                                                               |                                                                                                                               |
| Actual Endpoint    | Irritant                                                                                                                                                                              | Irritant                                                                                                                                                                                                         | Irritant                                                                                                                                                                                                         |
| Predicted Endpoint | Non-Irritant                                                                                                                                                                          | Non-Irritant                                                                                                                                                                                                     | Non-Irritant                                                                                                                                                                                                     |
| Distance           | 1.566                                                                                                                                                                                 | 1.654                                                                                                                                                                                                            | 1.755                                                                                                                                                                                                            |
| Reference          | JANTAJ Journal of Antibiotics. (Japan Antibiotics Research Assoc., 2-20-8 Ka miosaki, Shinagawa-ku, Tokyo, 141, Japan) V.2-5, 1948-52; V.21- 1968- Volume(issue)/page/year: 30,1,1977 | 28ZPAK "Sbornik Vysledku Toxilogickeho Vysetreni Latek A Pripravku," Marhol d, J.V., Institut Pro Vychovu Vedoucicn Pracovniku Chemickeho Prumyclu Praha, Cz echoslovakia, 1972 Volume(issue)/page/year: -,237,1 | 28ZPAK "Sbornik Vysledku Toxilogickeho Vysetreni Latek A Pripravku," Marhol d, J.V., Institut Pro Vychovu Vedoucicn Pracovniku Chemickeho Prumyclu Praha, Cz echoslovakia, 1972 Volume(issue)/page/year: -,234,1 |

## Model Applicability

Unknown features are fingerprint features in the query molecule, but not found in the training set.

- OPS PC23 out of range. Value: -3.2619. Training min, max, SD, explained variance: -3.0369, 4.9599, 1.007, 0.0128.

## Feature Contribution

### Top features for positive contribution

| Fingerprint | Bit/Smiles | Feature Structure | Score | Irritant in training set |
|-------------|------------|-------------------|-------|--------------------------|
|-------------|------------|-------------------|-------|--------------------------|

|                                        |             |                                                                                                                                                     |        |                          |
|----------------------------------------|-------------|-----------------------------------------------------------------------------------------------------------------------------------------------------|--------|--------------------------|
| FCFP_12                                | -1251367201 | 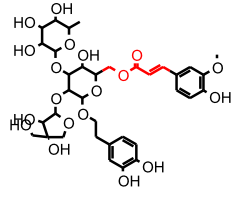 <chem>[*]C=C(C(=O)OC([*])[*])</chem>                            | 0.086  | 31 out of 31             |
| FCFP_12                                | 654335567   |  <chem>[*]OC(COC(=O)[*])[*]C([*])[*]</chem>                      | 0.086  | 29 out of 29             |
| FCFP_12                                | -415156552  |  <chem>[*]C[C@@]1(O)C([*])[*]C1[*]</chem>                        | 0.085  | 27 out of 27             |
| Top Features for negative contribution |             |                                                                                                                                                     |        |                          |
| Fingerprint                            | Bit/Smiles  | Feature Structure                                                                                                                                   | Score  | Irritant in training set |
| FCFP_12                                | 949015626   |  <chem>[*]C[c]1:[cH]:[*]:[c]([*]):[c]([*]):[c](O):[cH]:1</chem> | -0.222 | 2 out of 3               |
| FCFP_12                                | -204034463  |  <chem>[*][c]1:[*]:[cH]:[c](O):[c](O):[cH]:1</chem>            | -0.222 | 2 out of 3               |

FCFP\_12

7

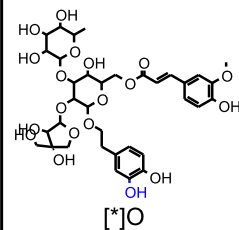

-0.118

104 out of 128

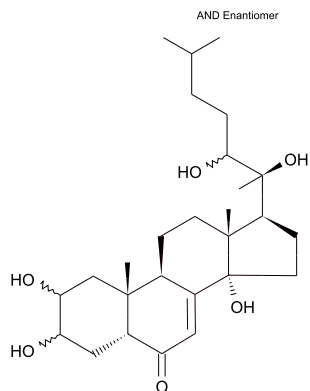
 $C_{27}H_{44}O_6$ 

Molecular Weight: 464.63466

ALogP: 2.489

Rotatable Bonds: 5

Acceptors: 6

Donors: 5

## Model Prediction

**Prediction: Irritant**

Probability: 0.998

Enrichment: 1.083

Bayesian Score: 0.573

Mahalanobis Distance: 15.638

Mahalanobis Distance p-value: 1.31e-016

Prediction: Positive if the Bayesian score is above the estimated best cutoff value from minimizing the false positive and false negative rate.

Probability: The estimated probability that the sample is in the positive category. This assumes that the Bayesian score follows a normal distribution and is different from the prediction using a cutoff.

Enrichment: An estimate of enrichment, that is, the increased likelihood (versus random) of this sample being in the category.

Bayesian Score: The standard Laplacian-modified Bayesian score.

Mahalanobis Distance: The Mahalanobis distance (MD) is the distance to the center of the training data. The larger the MD, the less trustworthy the prediction.

Mahalanobis Distance p-value: The p-value gives the fraction of training data with an MD greater than or equal to the one for the given sample, assuming normally distributed data. The smaller the p-value, the less trustworthy the prediction. For highly non-normal X properties (e.g., fingerprints), the MD p-value is wildly inaccurate.

## Structural Similar Compounds

| Name               | Anthraquinone, 2-bromo-1,8-diamino-4,5-dihydroxy-                                                                                                                                                                   | Anthraquinone, 1,4,5,8-tetrahydroxy-                                                                                                                 | Anthraquinone, 1,5-diamino-4,8-dihydroxy- |
|--------------------|---------------------------------------------------------------------------------------------------------------------------------------------------------------------------------------------------------------------|------------------------------------------------------------------------------------------------------------------------------------------------------|-------------------------------------------|
| Structure          |                                                                                                                                                                                                                     |                                                                                                                                                      |                                           |
| Actual Endpoint    | Irritant                                                                                                                                                                                                            | Irritant                                                                                                                                             | Non-Irritant                              |
| Predicted Endpoint | Non-Irritant                                                                                                                                                                                                        | Non-Irritant                                                                                                                                         | Non-Irritant                              |
| Distance           | 0.977                                                                                                                                                                                                               | 1.082                                                                                                                                                | 1.118                                     |
| Reference          | 28ZPAK "Sbornik Vysledku Toxikologickeho Vysetreni Latek A Pripravku," Marhol d, J.V., Institut Pro Vychovu Vedoucich Pracovniku Chemickeho Prumyclu Praha, Cechoslovakia, 1972<br>Volume(issue)/page/year: -,244,1 | 85JCAE "Prehled Prumyslove Toxikologie; Organické Latky," Marhold, J., Prague, Czechoslovakia, Avicenum, 1986<br>Volume(issue)/page/year: -,655,1986 | 28ZPAK -,103,72                           |

## Model Applicability

Unknown features are fingerprint features in the query molecule, but not found in the training set.

1. All properties and OPS components are within expected ranges.

## Feature Contribution

### Top features for positive contribution

| Fingerprint | Bit/Smiles | Feature Structure | Score | Irritant in training set |
|-------------|------------|-------------------|-------|--------------------------|
|             |            |                   |       |                          |



|                                        |             |                                                                                                                                                 |        |                          |
|----------------------------------------|-------------|-------------------------------------------------------------------------------------------------------------------------------------------------|--------|--------------------------|
| FCFP_12                                | -1870530637 | 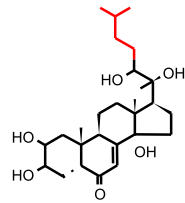<br><chem>[*]CCC(C)C</chem>                                   | 0.087  | 44 out of 44             |
| FCFP_12                                | -415156552  | <br><chem>[*]C[C@@]1(O)C[*]1C1[*]</chem>                     | 0.085  | 27 out of 27             |
| FCFP_12                                | -1742546106 | <br><chem>[*]C@@H1[*]C@2([*])[*]1C@H([*])C@@2(C)CC1</chem>   | 0.084  | 17 out of 17             |
| Top Features for negative contribution |             |                                                                                                                                                 |        |                          |
| Fingerprint                            | Bit/Smiles  | Feature Structure                                                                                                                               | Score  | Irritant in training set |
| FCFP_12                                | 3           | <br><chem>[*]O</chem>                                       | -0.081 | 291 out of 345           |
| FCFP_12                                | 1002543125  | <br><chem>[*]C@@H1[*]C@@H([*])C(=CC1=O)C([*])([*])1</chem> | 0.000  | 1 out of 1               |

|         |           |                                                                                                                                                                  |       |            |
|---------|-----------|------------------------------------------------------------------------------------------------------------------------------------------------------------------|-------|------------|
| FCFP_12 | 351491212 | 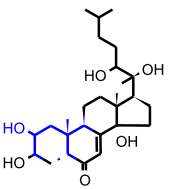<br><chem>CC(C)CC(O)C1C(C(C1)O)C(=O)C2C(C(C2)O)C(C(C(C3C(C(C3)O)O)O)O)O</chem> | 0.000 | 1 out of 1 |
|---------|-----------|------------------------------------------------------------------------------------------------------------------------------------------------------------------|-------|------------|

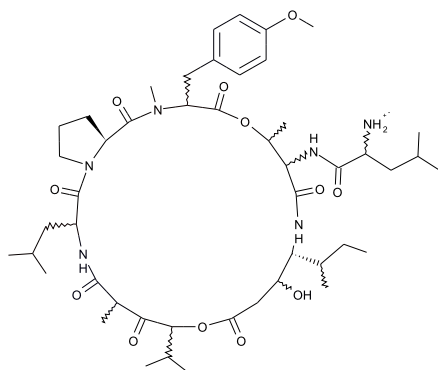
 $C_{49}H_{79}N_6O_{12}$ 

Molecular Weight: 944.18455

ALogP: 3.176

Rotatable Bonds: 13

Acceptors: 12

Donors: 5

## Model Prediction

**Prediction: Irritant**

Probability: 0.976

Enrichment: 1.060

Bayesian Score: -0.424

Mahalanobis Distance: 22.004

Mahalanobis Distance p-value: 7.91e-048

Prediction: Positive if the Bayesian score is above the estimated best cutoff value from minimizing the false positive and false negative rate.

Probability: The estimated probability that the sample is in the positive category. This assumes that the Bayesian score follows a normal distribution and is different from the prediction using a cutoff.

Enrichment: An estimate of enrichment, that is, the increased likelihood (versus random) of this sample being in the category.

Bayesian Score: The standard Laplacian-modified Bayesian score.

Mahalanobis Distance: The Mahalanobis distance (MD) is the distance to the center of the training data. The larger the MD, the less trustworthy the prediction.

Mahalanobis Distance p-value: The p-value gives the fraction of training data with an MD greater than or equal to the one for the given sample, assuming normally distributed data. The smaller the p-value, the less trustworthy the prediction. For highly non-normal X properties (e.g., fingerprints), the MD p-value is wildly inaccurate.

## Structural Similar Compounds

| Name               | 1,5-Naphthalenedisulfonic acid, 2-(6-(4,6-dichloro-s-triazinyl)methylamino-1-hydroxy-3-sulfonaphthylazo)-                                                                                                             | 2,7-Naphthalenedisulfonic acid, 4-(4,6-dichloro-s-triazin-2-ylamino)-5-hydroxy-6-(2-hydroxy-5-nitrophenylazo)-                                                                                                        | Anthraquinone, 3-methoxy-5,4'-iminobis(1-benzamido-                                                                                                                                                                   |
|--------------------|-----------------------------------------------------------------------------------------------------------------------------------------------------------------------------------------------------------------------|-----------------------------------------------------------------------------------------------------------------------------------------------------------------------------------------------------------------------|-----------------------------------------------------------------------------------------------------------------------------------------------------------------------------------------------------------------------|
| Structure          |                                                                                                                                                                                                                       |                                                                                                                                                                                                                       |                                                                                                                                                                                                                       |
| Actual Endpoint    | Irritant                                                                                                                                                                                                              | Irritant                                                                                                                                                                                                              | Irritant                                                                                                                                                                                                              |
| Predicted Endpoint | Non-Irritant                                                                                                                                                                                                          | Non-Irritant                                                                                                                                                                                                          | Non-Irritant                                                                                                                                                                                                          |
| Distance           | 1.236                                                                                                                                                                                                                 | 1.430                                                                                                                                                                                                                 | 1.492                                                                                                                                                                                                                 |
| Reference          | 28ZPAK "Sbornik Vysledku Toxikologickeho Vysetreni Latek A Pripravku," Marhol d, J.V., Institut Pro Vychovu Vedoucich Pracovniku Chemickeho Prumyclu Praha, Cz echoslovakia, 1972<br>Volume(issue)/page/year: -,237,1 | 28ZPAK "Sbornik Vysledku Toxikologickeho Vysetreni Latek A Pripravku," Marhol d, J.V., Institut Pro Vychovu Vedoucich Pracovniku Chemickeho Prumyclu Praha, Cz echoslovakia, 1972<br>Volume(issue)/page/year: -,234,1 | 28ZPAK "Sbornik Vysledku Toxikologickeho Vysetreni Latek A Pripravku," Marhol d, J.V., Institut Pro Vychovu Vedoucich Pracovniku Chemickeho Prumyclu Praha, Cz echoslovakia, 1972<br>Volume(issue)/page/year: -,114,1 |

## Model Applicability

Unknown features are fingerprint features in the query molecule, but not found in the training set.

- OPS PC11 out of range. Value: -5.9965. Training min, max, SD, explained variance: -5.6687, 5.5548, 1.412, 0.0252.
- OPS PC22 out of range. Value: 6.3722. Training min, max, SD, explained variance: -2.9623, 3.7863, 1.016, 0.0131.
- Unknown FCFP\_2 feature: 18028531: [\*]C([\*])[NH2+]C
- Unknown FCFP\_2 feature: -1817836174: [\*]CC([NH2+][\*])C(=[\*])[\*]

## Feature Contribution

Top features for positive contribution



|         |            |                                                                                                                                            |        |               |
|---------|------------|--------------------------------------------------------------------------------------------------------------------------------------------|--------|---------------|
| FCFP_12 | 346218766  | 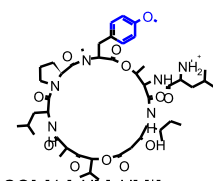<br><chem>CO[c]1:[cH]:[cH]:[*]:[cH]:[cH]:1</chem>       | -0.091 | 35 out of 42  |
| FCFP_12 | 1674451008 | <br><chem>[*]O[c]1:[cH]:[*]:[c]([*]):[cH]:[cH]:1</chem> | -0.087 | 93 out of 111 |

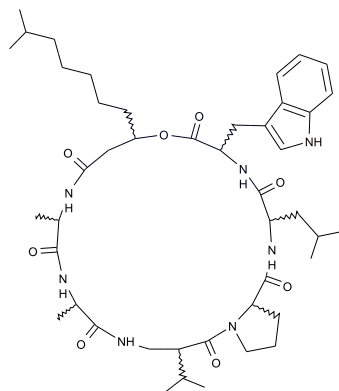
 $C_{45}H_{69}N_7O_8$ 

Molecular Weight: 836.07145

ALogP: 4.986

Rotatable Bonds: 11

Acceptors: 8

Donors: 6

## Model Prediction

Prediction: Non-Irritant

Probability: 0.967

Enrichment: 1.051

Bayesian Score: -1.176

Mahalanobis Distance: 21.475

Mahalanobis Distance p-value: 8.03e-045

Prediction: Positive if the Bayesian score is above the estimated best cutoff value from minimizing the false positive and false negative rate.

Probability: The estimated probability that the sample is in the positive category. This assumes that the Bayesian score follows a normal distribution and is different from the prediction using a cutoff.

Enrichment: An estimate of enrichment, that is, the increased likelihood (versus random) of this sample being in the category.

Bayesian Score: The standard Laplacian-modified Bayesian score.

Mahalanobis Distance: The Mahalanobis distance (MD) is the distance to the center of the training data. The larger the MD, the less trustworthy the prediction.

Mahalanobis Distance p-value: The p-value gives the fraction of training data with an MD greater than or equal to the one for the given sample, assuming normally distributed data. The smaller the p-value, the less trustworthy the prediction. For highly non-normal X properties (e.g., fingerprints), the MD p-value is wildly inaccurate.

## Structural Similar Compounds

| Name               | Anthraquinone, 3-methoxy-5,4'-iminobis(1-benzamido-                                                                                                                                                                   | 1,5-Naphthalenedisulfonic acid, 2-(6-(4,6-dichloro-s-triazinyl)methylamino-1-hydroxy-3-sulfonaphthylazo)-                                                                                                             | Butanamide, 2,2'-((3,3'-dichloro(1,1'-biphenyl)-4,4'-diyl)bis(azo)) bis(N-(2,4-dimethylphenyl)-3-oxo-                                                                            |
|--------------------|-----------------------------------------------------------------------------------------------------------------------------------------------------------------------------------------------------------------------|-----------------------------------------------------------------------------------------------------------------------------------------------------------------------------------------------------------------------|----------------------------------------------------------------------------------------------------------------------------------------------------------------------------------|
| Structure          |                                                                                                                                                                                                                       |                                                                                                                                                                                                                       |                                                                                                                                                                                  |
| Actual Endpoint    | Irritant                                                                                                                                                                                                              | Irritant                                                                                                                                                                                                              | Irritant                                                                                                                                                                         |
| Predicted Endpoint | Non-Irritant                                                                                                                                                                                                          | Non-Irritant                                                                                                                                                                                                          | Non-Irritant                                                                                                                                                                     |
| Distance           | 1.272                                                                                                                                                                                                                 | 1.487                                                                                                                                                                                                                 | 1.502                                                                                                                                                                            |
| Reference          | 28ZPAK "Sbornik Vysledku Toxikologickeho Vysetreni Latek A Pripravku," Marhol d, J.V., Institut Pro Vychovu Vedoucich Pracovniku Chemickeho Prumyclu Praha, Cz echoslovakia, 1972<br>Volume(issue)/page/year: -,114,1 | 28ZPAK "Sbornik Vysledku Toxikologickeho Vysetreni Latek A Pripravku," Marhol d, J.V., Institut Pro Vychovu Vedoucich Pracovniku Chemickeho Prumyclu Praha, Cz echoslovakia, 1972<br>Volume(issue)/page/year: -,237,1 | NTIS** National Technical Information Service. (Springfield, VA 22161) Forme rly U.S. Clearinghouse for Scientific & Technical Information. Volume(issue)/pag e/year: OTS0555058 |

## Model Applicability

Unknown features are fingerprint features in the query molecule, but not found in the training set.

1. OPS PC6 out of range. Value: 7.0054. Training min, max, SD, explained variance: -5.7234, 6.8628, 1.786, 0.0403.
2. OPS PC7 out of range. Value: 6.5715. Training min, max, SD, explained variance: -5.5319, 5.3664, 1.751, 0.0388.
3. OPS PC11 out of range. Value: -6.0201. Training min, max, SD, explained variance: -5.6687, 5.5548, 1.412, 0.0252.
4. OPS PC22 out of range. Value: 4.6233. Training min, max, SD, explained variance: -2.9623, 3.7863, 1.016, 0.0131.
5. Unknown FCFP\_2 feature: 1618184456: [\*][c]1:[\*]:[\*]:[nH]:c:1

## Feature Contribution

| Top features for positive contribution |             |                                                                                                                               |        |                          |
|----------------------------------------|-------------|-------------------------------------------------------------------------------------------------------------------------------|--------|--------------------------|
| Fingerprint                            | Bit/Smiles  | Feature Structure                                                                                                             | Score  | Irritant in training set |
| FCFP_12                                | -1870530637 | 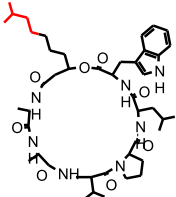<br><chem>[*]CCC(C)C</chem>                | 0.087  | 44 out of 44             |
| FCFP_12                                | -1873833927 | <br><chem>[*]CC(C(C)C)C(=O)[*]</chem>      | 0.080  | 10 out of 10             |
| FCFP_12                                | -154166589  | <br><chem>[*]CCCCC(C)C</chem>              | 0.078  | 8 out of 8               |
| Top Features for negative contribution |             |                                                                                                                               |        |                          |
| Fingerprint                            | Bit/Smiles  | Feature Structure                                                                                                             | Score  | Irritant in training set |
| FCFP_12                                | 392412010   | <br><chem>[*]CC(N[*])C(=O)OC([*])</chem> | -0.440 | 2 out of 4               |
|                                        |             |                                                                                                                               |        |                          |

|         |            |                                                                                                                               |        |              |
|---------|------------|-------------------------------------------------------------------------------------------------------------------------------|--------|--------------|
| FCFP_12 | 566058135  | 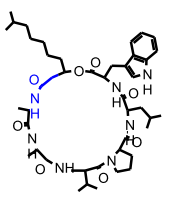<br><chem>[*]NC(=O)C([*])[*]</chem>        | -0.367 | 13 out of 21 |
| FCFP_12 | -547731249 | <br><chem>[*]C([*])CNC(=O)C([*])[*]</chem> | -0.222 | 2 out of 3   |



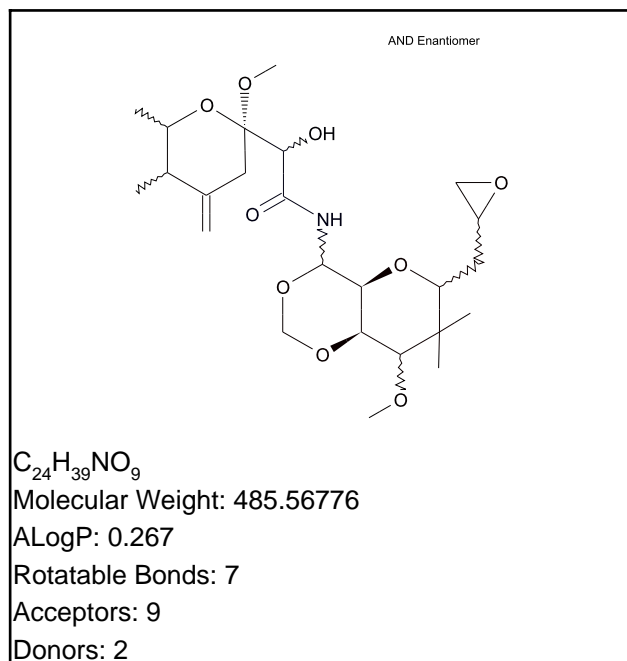

## Model Prediction

Prediction: Irritant

Probability: 0.996

Enrichment: 1.081

Bayesian Score: 0.061

Mahalanobis Distance: 15.663

Mahalanobis Distance p-value: 1.06e-016

Prediction: Positive if the Bayesian score is above the estimated best cutoff value from minimizing the false positive and false negative rate.

Probability: The estimated probability that the sample is in the positive category. This assumes that the Bayesian score follows a normal distribution and is different from the prediction using a cutoff.

Enrichment: An estimate of enrichment, that is, the increased likelihood (versus random) of this sample being in the category.

Bayesian Score: The standard Laplacian-modified Bayesian score.

Mahalanobis Distance: The Mahalanobis distance (MD) is the distance to the center of the training data. The larger the MD, the less trustworthy the prediction.

Mahalanobis Distance p-value: The p-value gives the fraction of training data with an MD greater than or equal to the one for the given sample, assuming normally distributed data. The smaller the p-value, the less trustworthy the prediction. For highly non-normal X properties (e.g., fingerprints), the MD p-value is wildly inaccurate.

## Structural Similar Compounds

| Name               | Pregna-1,4-diene-3,20-dione, 21-(acetyloxy)-11-hydroxy-6-methyl-17- (1-oxopropoxy)-, (6- $\alpha$ ,11- $\beta$ )-                                                                | 2-Anthracenesulfonic acid, 1-amino-9,10-dihydro-9,10-dioxo-4-(2,4,6-trimethylanilino)-, monosodium salt                                            | Benzenesulfonic acid, 2,2'-(1,4-anthraquinonylenediimino)bis(5-methyl-, disodium salt                                                              |
|--------------------|----------------------------------------------------------------------------------------------------------------------------------------------------------------------------------|----------------------------------------------------------------------------------------------------------------------------------------------------|----------------------------------------------------------------------------------------------------------------------------------------------------|
| Structure          | 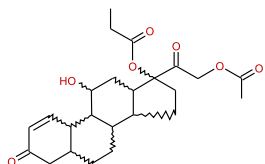                                                                                              |                                                                 |                                                                 |
| Actual Endpoint    | Irritant                                                                                                                                                                         | Irritant                                                                                                                                           | Irritant                                                                                                                                           |
| Predicted Endpoint | Irritant                                                                                                                                                                         | Non-Irritant                                                                                                                                       | Non-Irritant                                                                                                                                       |
| Distance           | 0.818                                                                                                                                                                            | 0.863                                                                                                                                              | 0.967                                                                                                                                              |
| Reference          | YACHDS Yakuri to Chiryo. Pharmacology and Therapeutics. (Raifu Saiensu Shup pan K.K., 2-5-13, Yaesu, Chuo-ku, Tokyo 104, Japan) V.1-1972- Volume(issue) /page/year: 19,3103,1991 | 85JCAE "Prehled Prumyslove Toxikologie; Organické Latky," Marhold, J., Prague, Czechoslovakia, Avicenum, 1986 Volume(issue)/page/year: -,1327,1986 | 85JCAE "Prehled Prumyslove Toxikologie; Organické Latky," Marhold, J., Prague, Czechoslovakia, Avicenum, 1986 Volume(issue)/page/year: -,1330,1986 |

## Model Applicability

Unknown features are fingerprint features in the query molecule, but not found in the training set.

1. OPS PC22 out of range. Value: 4.795. Training min, max, SD, explained variance: -2.9623, 3.7863, 1.016, 0.0131.

## Feature Contribution

| Top features for positive contribution |            |                   |       |                          |
|----------------------------------------|------------|-------------------|-------|--------------------------|
| Fingerprint                            | Bit/Smiles | Feature Structure | Score | Irritant in training set |
|                                        |            |                   |       |                          |

|                                        |            |                                                                                                                                         |        |                          |
|----------------------------------------|------------|-----------------------------------------------------------------------------------------------------------------------------------------|--------|--------------------------|
| FCFP_12                                | 654335567  | 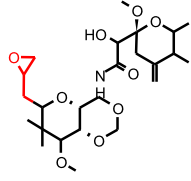<br><chem>[*]OC(COC(=[*])[*])C([*])[*]</chem>        | 0.086  | 29 out of 29             |
| FCFP_12                                | 470041467  | <br><chem>[*]OCO[*]</chem>                           | 0.081  | 11 out of 11             |
| FCFP_12                                | 436886043  | <br><chem>[*]C=C(C([*])[*])C([*])C([*])C([*])</chem> | 0.080  | 129 out of 130           |
| Top Features for negative contribution |            |                                                                                                                                         |        |                          |
| Fingerprint                            | Bit/Smiles | Feature Structure                                                                                                                       | Score  | Irritant in training set |
| FCFP_12                                | 566058135  | <br><chem>[*]NC(=O)C([*])[*]</chem>                 | -0.367 | 13 out of 21             |
| FCFP_12                                | 3          | <br><chem>[*]O</chem>                              | -0.081 | 291 out of 345           |

FCFP\_12

1070061035

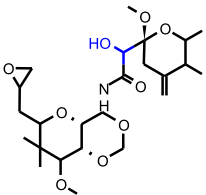

[\*]C([\*])O

0.000

215 out of 237

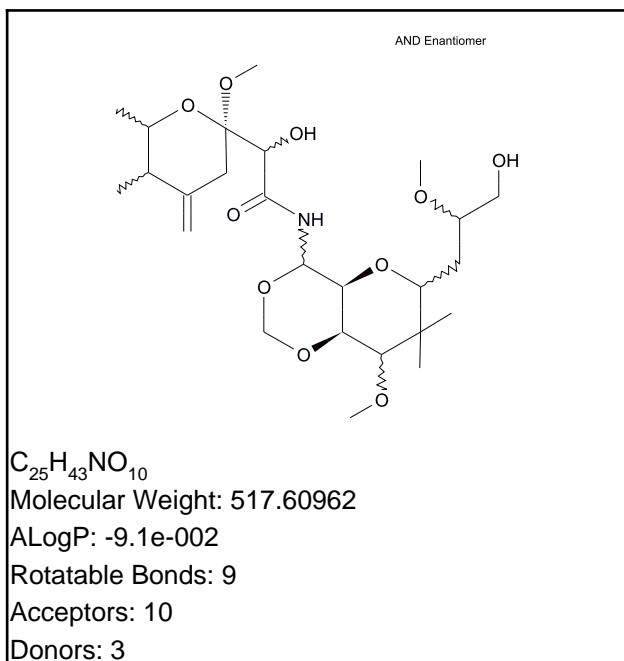

## Model Prediction

Prediction: Irritant

Probability: 0.996

Enrichment: 1.082

Bayesian Score: 0.194

Mahalanobis Distance: 15.040

Mahalanobis Distance p-value: 2.38e-014

Prediction: Positive if the Bayesian score is above the estimated best cutoff value from minimizing the false positive and false negative rate.

Probability: The estimated probability that the sample is in the positive category. This assumes that the Bayesian score follows a normal distribution and is different from the prediction using a cutoff.

Enrichment: An estimate of enrichment, that is, the increased likelihood (versus random) of this sample being in the category.

Bayesian Score: The standard Laplacian-modified Bayesian score.

Mahalanobis Distance: The Mahalanobis distance (MD) is the distance to the center of the training data. The larger the MD, the less trustworthy the prediction.

Mahalanobis Distance p-value: The p-value gives the fraction of training data with an MD greater than or equal to the one for the given sample, assuming normally distributed data. The smaller the p-value, the less trustworthy the prediction. For highly non-normal X properties (e.g., fingerprints), the MD p-value is wildly inaccurate.

## Structural Similar Compounds

| Name               | Benzenesulfonic acid, 2,2'-(1,4-anthraquinonylenediimino)bis(5-methyl-, disodium salt                                                              | 2-Anthracenesulfonic acid, 1-amino-9,10-dihydro-9,10-dioxo-4-(2,4,6-trimethylanilino)-, monosodium salt                                            | Fumaric acid, bis(3-allyloxy-2-hydroxypropyl) ester                                                                                               |
|--------------------|----------------------------------------------------------------------------------------------------------------------------------------------------|----------------------------------------------------------------------------------------------------------------------------------------------------|---------------------------------------------------------------------------------------------------------------------------------------------------|
| Structure          | 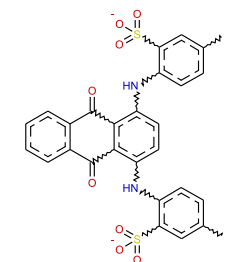                                                                |                                                                 |                                                                |
| Actual Endpoint    | Irritant                                                                                                                                           | Irritant                                                                                                                                           | Irritant                                                                                                                                          |
| Predicted Endpoint | Non-Irritant                                                                                                                                       | Non-Irritant                                                                                                                                       | Irritant                                                                                                                                          |
| Distance           | 0.932                                                                                                                                              | 1.022                                                                                                                                              | 1.042                                                                                                                                             |
| Reference          | 85JCAE "Prehled Prumyslove Toxikologie; Organické Latky," Marhold, J., Prague, Czechoslovakia, Avicenum, 1986 Volume(issue)/page/year: -,1330,1986 | 85JCAE "Prehled Prumyslove Toxikologie; Organické Latky," Marhold, J., Prague, Czechoslovakia, Avicenum, 1986 Volume(issue)/page/year: -,1327,1986 | 85JCAE "Prehled Prumyslove Toxikologie; Organické Latky," Marhold, J., Prague, Czechoslovakia, Avicenum, 1986 Volume(issue)/page/year: -,646,1986 |

## Model Applicability

Unknown features are fingerprint features in the query molecule, but not found in the training set.

- OPS PC22 out of range. Value: 4.7631. Training min, max, SD, explained variance: -2.9623, 3.7863, 1.016, 0.0131.

## Feature Contribution

| Top features for positive contribution |            |                   |       |                          |
|----------------------------------------|------------|-------------------|-------|--------------------------|
| Fingerprint                            | Bit/Smiles | Feature Structure | Score | Irritant in training set |
|                                        |            |                   |       |                          |

|                                        |            |                                                                                                                                |        |                          |
|----------------------------------------|------------|--------------------------------------------------------------------------------------------------------------------------------|--------|--------------------------|
| FCFP_12                                | 470041467  | 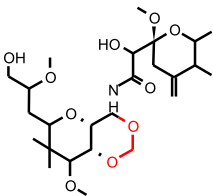<br>[*]OCO[*]                                | 0.081  | 11 out of 11             |
| FCFP_12                                | 436886043  | <br>[*]C=C(/C([*])([*])C<br>([*])([*])([*]) | 0.080  | 129 out of 130           |
| FCFP_12                                | 1327594201 | <br>[*]CC(O[*])(O[*])C([*]<br>)[*]          | 0.077  | 7 out of 7               |
| Top Features for negative contribution |            |                                                                                                                                |        |                          |
| Fingerprint                            | Bit/Smiles | Feature Structure                                                                                                              | Score  | Irritant in training set |
| FCFP_12                                | 566058135  | <br>[*]NC(=O)C([*])([*]                    | -0.367 | 13 out of 21             |
| FCFP_12                                | 3          | <br>[*]O                                  | -0.081 | 291 out of 345           |

FCFP\_12

136627117

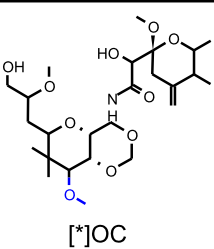

0.000

106 out of 116

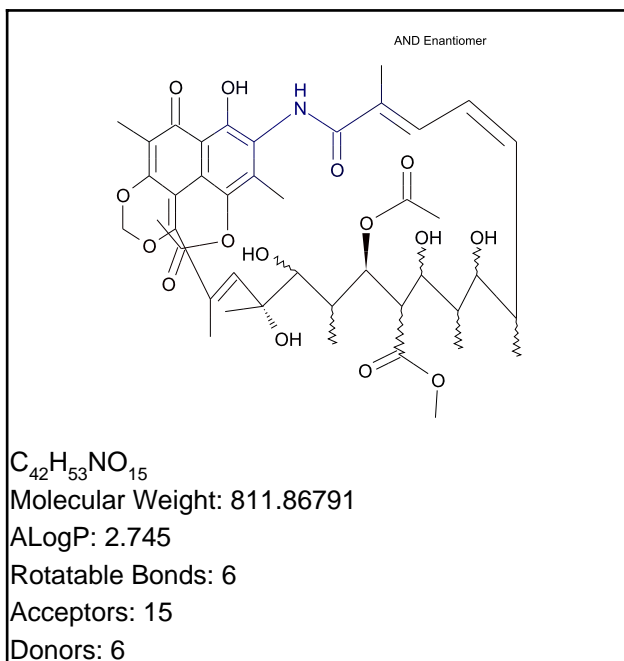

## Model Prediction

Prediction: Non-Irritant

Probability: 0.938

Enrichment: 1.019

Bayesian Score: -2.176

Mahalanobis Distance: 17.811

Mahalanobis Distance p-value: 6.54e-026

Prediction: Positive if the Bayesian score is above the estimated best cutoff value from minimizing the false positive and false negative rate.

Probability: The estimated probability that the sample is in the positive category. This assumes that the Bayesian score follows a normal distribution and is different from the prediction using a cutoff.

Enrichment: An estimate of enrichment, that is, the increased likelihood (versus random) of this sample being in the category.

Bayesian Score: The standard Laplacian-modified Bayesian score.

Mahalanobis Distance: The Mahalanobis distance (MD) is the distance to the center of the training data. The larger the MD, the less trustworthy the prediction.

Mahalanobis Distance p-value: The p-value gives the fraction of training data with an MD greater than or equal to the one for the given sample, assuming normally distributed data. The smaller the p-value, the less trustworthy the prediction. For highly non-normal X properties (e.g., fingerprints), the MD p-value is wildly inaccurate.

## Structural Similar Compounds

| Name               | 1,5-Naphthalenedisulfonic acid, 2-(6-(4,6-dichloro-s-triazinyl)methylamino-1-hydroxy-3-sulfonaphthylazo)-                                                                                                           | 2,7-Naphthalenedisulfonic acid, 4-(4,6-dichloro-s-triazin-2-ylamino)-5-hydroxy-6-(2-hydroxy-5-nitrophenylazo)-                                                                                                      | Amipurimycin, hydrate                                                                                                                                                                 |
|--------------------|---------------------------------------------------------------------------------------------------------------------------------------------------------------------------------------------------------------------|---------------------------------------------------------------------------------------------------------------------------------------------------------------------------------------------------------------------|---------------------------------------------------------------------------------------------------------------------------------------------------------------------------------------|
| Structure          | 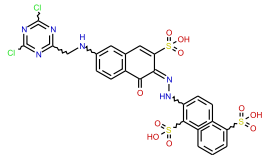                                                                                                                                 |                                                                                                                                  |                                                                                                    |
| Actual Endpoint    | Irritant                                                                                                                                                                                                            | Irritant                                                                                                                                                                                                            | Irritant                                                                                                                                                                              |
| Predicted Endpoint | Non-Irritant                                                                                                                                                                                                        | Non-Irritant                                                                                                                                                                                                        | Non-Irritant                                                                                                                                                                          |
| Distance           | 0.924                                                                                                                                                                                                               | 1.111                                                                                                                                                                                                               | 1.595                                                                                                                                                                                 |
| Reference          | 28ZPAK "Sbornik Vysledku Toxilogickeho Vysetreni Latek A Pripravku," Marhol d, J.V., Institut Pro Vychovu Vedoucich Pracovniku Chemickeho Prumyclu Praha, Cz echoslovakia, 1972<br>Volume(issue)/page/year: -,237,1 | 28ZPAK "Sbornik Vysledku Toxilogickeho Vysetreni Latek A Pripravku," Marhol d, J.V., Institut Pro Vychovu Vedoucich Pracovniku Chemickeho Prumyclu Praha, Cz echoslovakia, 1972<br>Volume(issue)/page/year: -,234,1 | JANTAJ Journal of Antibiotics. (Japan Antibiotics Research Assoc., 2-20-8 Ka miosaki, Shinagawa-ku, Tokyo, 141, Japan) V.2-5, 1948-52; V.21- 1968- Volume(issue)/page/year: 30,1,1977 |

## Model Applicability

Unknown features are fingerprint features in the query molecule, but not found in the training set.

- OPS PC23 out of range. Value: -3.1489. Training min, max, SD, explained variance: -3.0369, 4.9599, 1.007, 0.0128.

## Feature Contribution

### Top features for positive contribution

| Fingerprint | Bit/Smiles | Feature Structure | Score | Irritant in training set |
|-------------|------------|-------------------|-------|--------------------------|
|-------------|------------|-------------------|-------|--------------------------|

|                                        |             |                                                                                                                                                        |        |                          |
|----------------------------------------|-------------|--------------------------------------------------------------------------------------------------------------------------------------------------------|--------|--------------------------|
| FCFP_12                                | -415156552  | 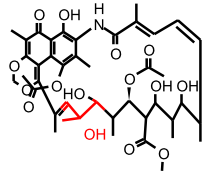<br><chem>[*]C[C@@]1(O)C[*]"[*]C1[*]</chem>                         | 0.085  | 27 out of 27             |
| FCFP_12                                | -1979033238 | <br><chem>[*][c](:[*]):[c](OC(=O)C):[c]([*]):[*]</chem>             | 0.084  | 19 out of 19             |
| FCFP_12                                | 470041467   | <br><chem>[*]OCO[*]</chem>                                          | 0.081  | 11 out of 11             |
| Top Features for negative contribution |             |                                                                                                                                                        |        |                          |
| Fingerprint                            | Bit/Smiles  | Feature Structure                                                                                                                                      | Score  | Irritant in training set |
| FCFP_12                                | 1175665944  | <br><chem>[*]C(=[*])C(=O)N[c](:[c]([*])[*]):[c]([*])[*]:[*]</chem> | -1.020 | 2 out of 8               |
| FCFP_12                                | 1294255210  | <br><chem>[*]C(=[*])N[c](:[*]):[*]</chem>                         | -0.486 | 12 out of 22             |



FCFP\_12

590925877

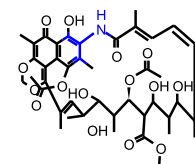

[\*]N[c](:[c]([\*]):[\*])  
):[c]([\*]):[\*]

-0.434

56 out of 95

# Simeprevir

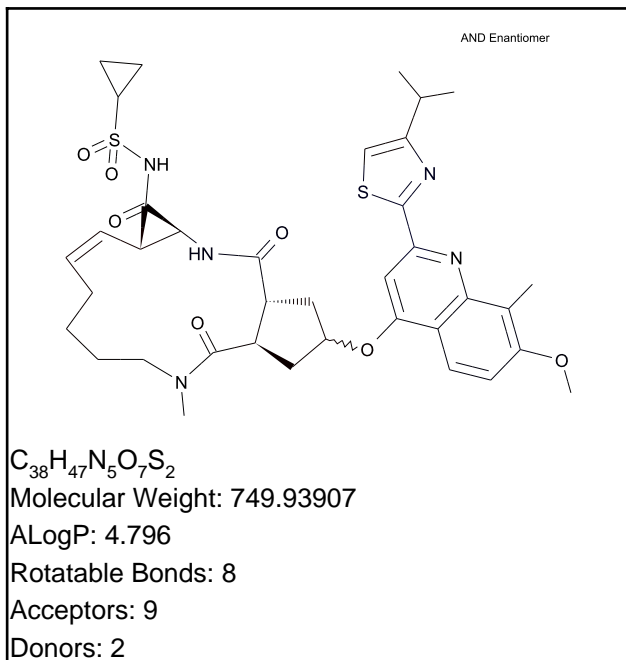

## Model Prediction

Prediction: Non-Irritant

Probability: 0.969

Enrichment: 1.053

Bayesian Score: -1.048

Mahalanobis Distance: 16.814

Mahalanobis Distance p-value: 1.94e-021

Prediction: Positive if the Bayesian score is above the estimated best cutoff value from minimizing the false positive and false negative rate.

Probability: The estimated probability that the sample is in the positive category. This assumes that the Bayesian score follows a normal distribution and is different from the prediction using a cutoff.

Enrichment: An estimate of enrichment, that is, the increased likelihood (versus random) of this sample being in the category.

Bayesian Score: The standard Laplacian-modified Bayesian score.

Mahalanobis Distance: The Mahalanobis distance (MD) is the distance to the center of the training data. The larger the MD, the less trustworthy the prediction.

Mahalanobis Distance p-value: The p-value gives the fraction of training data with an MD greater than or equal to the one for the given sample, assuming normally distributed data. The smaller the p-value, the less trustworthy the prediction. For highly non-normal X properties (e.g., fingerprints), the MD p-value is wildly inaccurate.

# TOPKAT\_Skin\_Irritancy\_None\_vs\_Irritant

## Structural Similar Compounds

| Name               | Anthraquinone, 3-methoxy-5,4'-iminobis(1-benzamido-                                                                                                                                                               | Benzenesulfonic acid, 2,2'-(1,4-anthraquinonylenediimino)bis(5-methyl-, disodium salt                                                                 | Butanamide, 2,2'-((3,3'-dichloro(1,1'-biphenyl)-4,4'-diyl)bis(azo)) bis(N-(2,4-dimethylphenyl)-3-oxo-                                                                             |
|--------------------|-------------------------------------------------------------------------------------------------------------------------------------------------------------------------------------------------------------------|-------------------------------------------------------------------------------------------------------------------------------------------------------|-----------------------------------------------------------------------------------------------------------------------------------------------------------------------------------|
| Structure          | 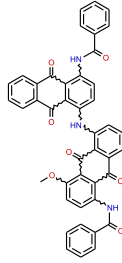                                                                                                                               |                                                                    |                                                                                                |
| Actual Endpoint    | Irritant                                                                                                                                                                                                          | Irritant                                                                                                                                              | Irritant                                                                                                                                                                          |
| Predicted Endpoint | Non-Irritant                                                                                                                                                                                                      | Non-Irritant                                                                                                                                          | Non-Irritant                                                                                                                                                                      |
| Distance           | 0.883                                                                                                                                                                                                             | 1.017                                                                                                                                                 | 1.027                                                                                                                                                                             |
| Reference          | 28ZPAK "Sbornik Vysledku Toxologickeho Vysetreni Latek A Pripravku," Marhold, J.V., Institut Pro Vychovu Vedoucich Pracovniku Chemickeho Prumyslu Praha, Czechoslovakia, 1972<br>Volume(issue)/page/year: -,114,1 | 85JCAE "Prehled Prumyslove Toxikologie; Organické Latky," Marhold, J., Prague, Czechoslovakia, Avicenum, 1986<br>Volume(issue)/page/year: -,1330,1986 | NTIS** National Technical Information Service. (Springfield, VA 22161) Formerly U.S. Clearinghouse for Scientific & Technical Information.<br>Volume(issue)/page/year: OTS0555058 |

## Model Applicability

Unknown features are fingerprint features in the query molecule, but not found in the training set.

- OPS PC6 out of range. Value: 7.6954. Training min, max, SD, explained variance: -5.7234, 6.8628, 1.786, 0.0403.
- OPS PC22 out of range. Value: 5.1294. Training min, max, SD, explained variance: -2.9623, 3.7863, 1.016, 0.0131.

## Feature Contribution

| Top features for positive contribution |            |                   |       |                          |
|----------------------------------------|------------|-------------------|-------|--------------------------|
| Fingerprint                            | Bit/Smiles | Feature Structure | Score | Irritant in training set |
|                                        |            |                   |       |                          |

|                                        |            |                                                                                                                                              |        |                          |
|----------------------------------------|------------|----------------------------------------------------------------------------------------------------------------------------------------------|--------|--------------------------|
| FCFP_12                                | -415156552 | 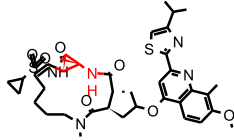<br><chem>[*]C[C@@]1(O)C[*]"C1[*]</chem>                  | 0.085  | 27 out of 27             |
| FCFP_12                                | -53728878  | <br><chem>[*]OC1C[C@@H]([*])C[C@@H]([*])C(=[*])[*]</chem> | 0.085  | 21 out of 21             |
| FCFP_12                                | 1186303932 | <br><chem>[*]:[c](:[*])C(C)C</chem>                       | 0.084  | 18 out of 18             |
| Top Features for negative contribution |            |                                                                                                                                              |        |                          |
| Fingerprint                            | Bit/Smiles | Feature Structure                                                                                                                            | Score  | Irritant in training set |
| FCFP_12                                | 690481386  | <br><chem>[*]:[c](:[*])[c]1:n:[*]:[*]:s:1</chem>         | -0.650 | 0 out of 1               |
| FCFP_12                                | 566058135  | <br><chem>[*]NC(=O)C([*])[*]</chem>                     | -0.367 | 13 out of 21             |

FCFP\_12

-1320007763

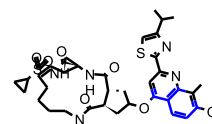

[\*][c]1:[\*]:[\*]:[c]2:  
[\*]:[cH]:[cH]:[cH]:[  
c]:1:2

-0.089

20 out of 24

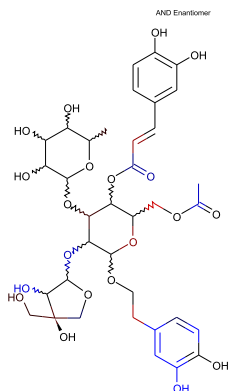
$$\text{C}_{36}\text{H}_{46}\text{O}_{20}$$

Molecular Weight: 798.73843

|ALogP: -0.546

Rotatable Bonds: 16

Acceptors: 20

Donors: 10

## Model Prediction

Prediction: 2.871

Unit: mg/kg\_body\_weight/day

Mahalanobis Distance: 19.229

Mahalanobis Distance p-value: 1.71e-027

**Mahalanobis Distance:** The Mahalanobis distance (MD) is a generalization of the Euclidean distance that accounts for correlations among the X properties. It is calculated as the distance to the center of the training data. The larger the MD, the less trustworthy the prediction.

Mahalanobis Distance p-value: The p-value gives the fraction of training data with an MD greater than or equal to the one for the given sample, assuming normally distributed data. The smaller the p-value, the less trustworthy the prediction. For highly non-normal X properties (e.g., fingerprints), the MD p-value is wildly inaccurate.

## Structural Similar Compounds

| Name                        | 532                                                                                 | 380                                                                                 | 706                                                                                 |
|-----------------------------|-------------------------------------------------------------------------------------|-------------------------------------------------------------------------------------|-------------------------------------------------------------------------------------|
| Structure                   | 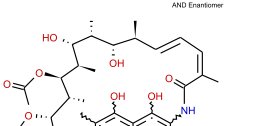 |  |  |
| Actual Endpoint (-log C)    | 4.38903                                                                             | 4.48977                                                                             | 3.00743                                                                             |
| Predicted Endpoint (-log C) | 5.60554                                                                             | 6.22716                                                                             | 4.81633                                                                             |
| Distance                    | 1.398                                                                               | 1.553                                                                               | 1.641                                                                               |
| Reference                   | CPDB                                                                                | CPDB                                                                                | CPDB                                                                                |

## Model Applicability

Unknown features are fingerprint features in the query molecule, but not found in the training set.

1. Num\_H\_Donors out of range. Value: 10. Training min, max, mean, SD: 0, 8, 1.1962, 1.306.
2. OPS PC2 out of range. Value: 9.0039. Training min, max, SD, explained variance: -5.652, 8.9166, 2.513, 0.0788.
3. Unknown ECFP\_2 feature: 456242574: [\*]C([\*])OC([\*])[\*]
4. Unknown ECFP\_2 feature: -1250019913: [\*]COC([\*])[\*]
5. Unknown ECFP\_2 feature: -2060414325: [\*]OC(O[\*])C([\*])[\*]
6. Unknown ECFP\_2 feature: 1953003528: [\*]C[C@ @]1(O)C[\*][\*]C1[\*]
7. Unknown ECFP\_2 feature: 1535429263: [\*]OC(C)C([\*])[\*]

## Feature Contribution

| Top features for positive contribution |            |                   |       |
|----------------------------------------|------------|-------------------|-------|
| Fingerprint                            | Bit/Smiles | Feature Structure | Score |
|                                        |            |                   |       |

| ECFP_6                                 | 1559650422  | <p>AND Enantiomer</p> <p>[*]C[*]</p>                    | 0.203  |
|----------------------------------------|-------------|---------------------------------------------------------|--------|
| ECFP_6                                 | -2024255407 | <p>AND Enantiomer</p> <p>[*]C[c](:[cH]:[*])H:[*]</p>    | 0.172  |
| ECFP_6                                 | -1925046727 | <p>AND Enantiomer</p> <p>[*]C=[*]</p>                   | 0.145  |
| Top Features for negative contribution |             |                                                         |        |
| Fingerprint                            | Bit/Smiles  | Feature Structure                                       | Score  |
| ECFP_6                                 | 2019062761  | <p>AND Enantiomer</p> <p>[*]:[c](:[*])O</p>             | -0.258 |
| ECFP_6                                 | 1996767644  | <p>AND Enantiomer</p> <p>[*][c](:[*]):[cH]:[cH]:[*]</p> | -0.251 |

ECFP\_6

642810091

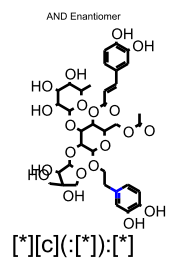

-0.247

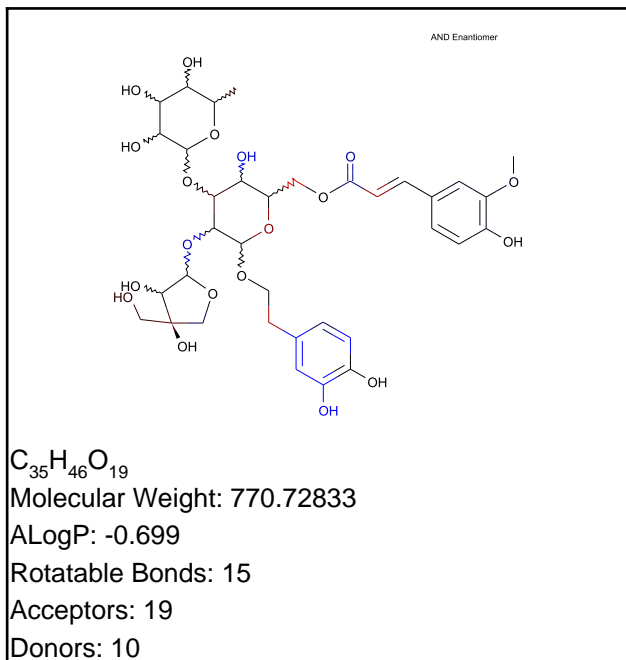

### Model Prediction

Prediction: 1.854

Unit: mg/kg\_body\_weight/day

Mahalanobis Distance: 18.931

Mahalanobis Distance p-value: 2.2e-026

Mahalanobis Distance: The Mahalanobis distance (MD) is a generalization of the Euclidean distance that accounts for correlations among the X properties. It is calculated as the distance to the center of the training data. The larger the MD, the less trustworthy the prediction.

Mahalanobis Distance p-value: The p-value gives the fraction of training data with an MD greater than or equal to the one for the given sample, assuming normally distributed data. The smaller the p-value, the less trustworthy the prediction. For highly non-normal X properties (e.g., fingerprints), the MD p-value is wildly inaccurate.

### Structural Similar Compounds

| Name                        | 532                                                                                 | 380                                                                                 | Fumonisin B1                                                                        |
|-----------------------------|-------------------------------------------------------------------------------------|-------------------------------------------------------------------------------------|-------------------------------------------------------------------------------------|
| Structure                   | 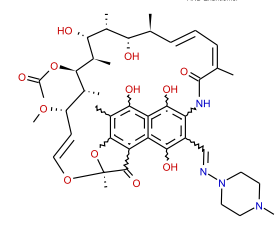 |  |  |
| Actual Endpoint (-log C)    | 4.38903                                                                             | 4.48977                                                                             | 4.94025                                                                             |
| Predicted Endpoint (-log C) | 5.60554                                                                             | 6.22716                                                                             | 3.434                                                                               |
| Distance                    | 1.324                                                                               | 1.463                                                                               | 1.613                                                                               |
| Reference                   | CPDB                                                                                | CPDB                                                                                | CPDB                                                                                |

### Model Applicability

Unknown features are fingerprint features in the query molecule, but not found in the training set.

1. Num\_H\_Donors out of range. Value: 10. Training min, max, mean, SD: 0, 8, 1.1962, 1.306.
2. Unknown ECFP\_2 feature: 456242574: [\*]C([\*])OC([\*])[\*]
3. Unknown ECFP\_2 feature: -1250019913: [\*]COC([\*])[\*]
4. Unknown ECFP\_2 feature: -2060414325: [\*]OC(O[\*])C([\*])[\*]
5. Unknown ECFP\_2 feature: 1953003528: [\*]C[C@@]1(O)C[\*][\*]C1[\*]
6. Unknown ECFP\_2 feature: 1535429263: [\*]OC(C)C([\*])[\*]

### Feature Contribution

#### Top features for positive contribution

| Fingerprint | Bit/Smiles | Feature Structure                                                                     | Score |
|-------------|------------|---------------------------------------------------------------------------------------|-------|
| ECFP_6      | 1559650422 | 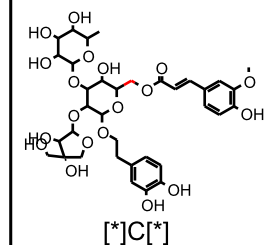 | 0.203 |



|                                        |             |                                                                                                                                  |        |
|----------------------------------------|-------------|----------------------------------------------------------------------------------------------------------------------------------|--------|
| ECFP_6                                 | -2024255407 | 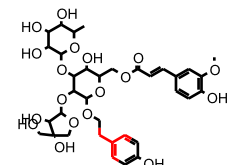<br><chem>[*]C[c](:[cH]:[*]):[cH]:[*]</chem>  | 0.172  |
| ECFP_6                                 | -1925046727 | <br><chem>[*]C=[*]</chem>                     | 0.145  |
| Top Features for negative contribution |             |                                                                                                                                  |        |
| Fingerprint                            | Bit/Smiles  | Feature Structure                                                                                                                | Score  |
| ECFP_6                                 | 2019062761  | <br><chem>[*]:[c](:[*])O</chem>               | -0.258 |
| ECFP_6                                 | 1996767644  | <br><chem>[*][c](:[*]):[cH]:[cH]:[*]</chem> | -0.251 |
| ECFP_6                                 | 642810091   | <br><chem>[*][c](:[*]):[*]</chem>           | -0.247 |



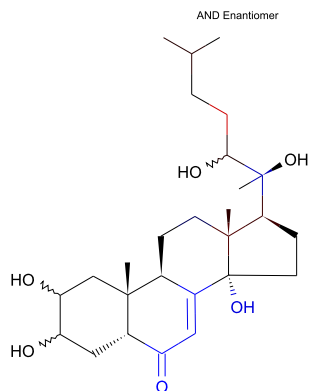
 $C_{27}H_{44}O_6$ 

Molecular Weight: 464.63466

ALogP: 2.489

Rotatable Bonds: 5

Acceptors: 6

Donors: 5

## Model Prediction

Prediction: 5.663

Unit: mg/kg\_body\_weight/day

Mahalanobis Distance: 9.188

Mahalanobis Distance p-value: 0.213

Mahalanobis Distance: The Mahalanobis distance (MD) is a generalization of the Euclidean distance that accounts for correlations among the X properties. It is calculated as the distance to the center of the training data. The larger the MD, the less trustworthy the prediction.

Mahalanobis Distance p-value: The p-value gives the fraction of training data with an MD greater than or equal to the one for the given sample, assuming normally distributed data. The smaller the p-value, the less trustworthy the prediction. For highly non-normal X properties (e.g., fingerprints), the MD p-value is wildly inaccurate.

## Structural Similar Compounds

| Name                        | a-Ecdysone | 894     | Phorbol |
|-----------------------------|------------|---------|---------|
| Structure                   |            |         |         |
| Actual Endpoint (-log C)    | 7.11323    | 7.11323 | 5.21723 |
| Predicted Endpoint (-log C) | 4.88091    | 4.88091 | 4.6562  |
| Distance                    | 0.244      | 0.244   | 0.755   |
| Reference                   | CPDB       | CPDB    | CPDB    |

## Model Applicability

Unknown features are fingerprint features in the query molecule, but not found in the training set.

1. All properties and OPS components are within expected ranges.
2. Unknown ECFP\_2 feature: -1049278438: [\*]C([\*])([\*])[C@H]1C[\*][\*]C1([\*])[\*]
3. Unknown ECFP\_2 feature: 1195714366: [\*]C([\*])C(C)(O)C([\*])[\*]
4. Unknown ECFP\_2 feature: 80071435: [\*]CC(O)C([\*])([\*])[\*]

## Feature Contribution

### Top features for positive contribution

| Fingerprint | Bit/Smiles | Feature Structure | Score |
|-------------|------------|-------------------|-------|
| ECFP_6      | 1559650422 |                   | 0.203 |

|                                        |            |                                                                                                                        |        |
|----------------------------------------|------------|------------------------------------------------------------------------------------------------------------------------|--------|
| ECFP_6                                 | 657586427  | 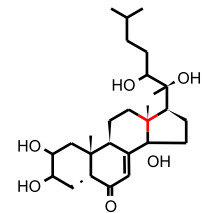<br><chem>[*]C([*])([*])[*]</chem>   | 0.079  |
| ECFP_6                                 | -167460056 | <br><chem>[*]C([*])[*]</chem>       | 0.060  |
| Top Features for negative contribution |            |                                                                                                                        |        |
| Fingerprint                            | Bit/Smiles | Feature Structure                                                                                                      | Score  |
| ECFP_6                                 | 2106656448 | <br><chem>[*]C(=O)[*]</chem>        | -0.275 |
| ECFP_6                                 | 642810091  | <br><chem>[*][c](:[*]):[*]</chem> | -0.247 |
| ECFP_6                                 | -182236392 | <br><chem>[*]:[cH]:[*]</chem>     | -0.232 |



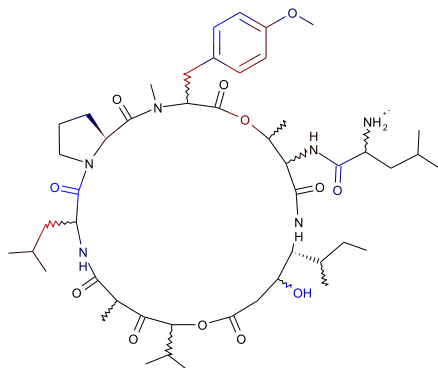
 $C_{49}H_{79}N_6O_{12}$ 

Molecular Weight: 944.18455

ALogP: 3.176

Rotatable Bonds: 13

Acceptors: 12

Donors: 5

## Model Prediction

Prediction: 8.687

Unit: mg/kg\_body\_weight/day

Mahalanobis Distance: 17.537

Mahalanobis Distance p-value: 2.3e-021

Mahalanobis Distance: The Mahalanobis distance (MD) is a generalization of the Euclidean distance that accounts for correlations among the X properties. It is calculated as the distance to the center of the training data. The larger the MD, the less trustworthy the prediction.

Mahalanobis Distance p-value: The p-value gives the fraction of training data with an MD greater than or equal to the one for the given sample, assuming normally distributed data. The smaller the p-value, the less trustworthy the prediction. For highly non-normal X properties (e.g., fingerprints), the MD p-value is wildly inaccurate.

## Structural Similar Compounds

| Name                        | 532     | 338     | Leupeptin |
|-----------------------------|---------|---------|-----------|
| Structure                   |         |         |           |
| Actual Endpoint (-log C)    | 4.38903 | 4.39533 | 3.88334   |
| Predicted Endpoint (-log C) | 5.60554 | 4.31268 | 4.28559   |
| Distance                    | 1.011   | 1.229   | 1.323     |
| Reference                   | CPDB    | CPDB    | CPDB      |

## Model Applicability

Unknown features are fingerprint features in the query molecule, but not found in the training set.

1. Molecular\_Weight out of range. Value: 944.18. Training min, max, mean, SD: 30.026, 871.78, 225.83, 133.9.
2. Unknown ECFP\_2 feature: -591526139: [\*][NH2+][\*]
3. Unknown ECFP\_2 feature: 1617733200: [\*]C([\*])N(C)C(=[\*])[\*]
4. Unknown ECFP\_2 feature: 1352327988: [\*]C([\*])[NH2+]
5. Unknown ECFP\_2 feature: -84540346: [\*]C([\*])CC([\*])[\*]
6. Unknown ECFP\_2 feature: -1224874527: [\*]CC(N([\*])[\*])C(=[\*])[\*]
7. Unknown ECFP\_2 feature: 1691770380: [\*]NC(C([\*])[\*])C([\*])[\*]
8. Unknown ECFP\_2 feature: 771121623: [\*]C([\*])C(c):[\*]:[\*]
9. Unknown ECFP\_2 feature: -1567199489: [\*]NC(C([\*])[\*])C(=[\*])[\*]
10. Unknown ECFP\_2 feature: -1886208901: [\*]OC(=O)C([\*])[\*]
11. Unknown ECFP\_2 feature: 1535429263: [\*]OC(C)C([\*])[\*]
12. Unknown ECFP\_2 feature: -714938792: [\*]C(=[\*])C(C)C(=[\*])[\*]
13. Unknown ECFP\_2 feature: -855787384: [\*]OC(C([\*])[\*])C(=[\*])[\*]
14. Unknown ECFP\_2 feature: -212107780: [\*]C([\*])C(=O)C([\*])[\*]
15. Unknown ECFP\_2 feature: -1167589895: [\*]C([\*])C(C)C
16. Unknown ECFP\_2 feature: 20550775: [\*]CC([NH2+][\*])C(=[\*])[\*]
17. Unknown ECFP\_2 feature: 866401773: [\*][NH2+]

## Feature Contribution

| Top features for positive contribution |             |                                                                                                                        |        |
|----------------------------------------|-------------|------------------------------------------------------------------------------------------------------------------------|--------|
| Fingerprint                            | Bit/Smiles  | Feature Structure                                                                                                      | Score  |
| ECFP_6                                 | 1559650422  | 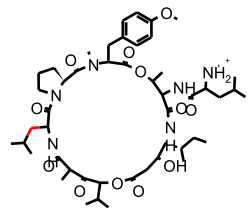<br>[*]C[*]                         | 0.203  |
| ECFP_6                                 | -2024255407 | <br>[*]C[c](:[cH]:[*]):[c<br>H]:[*] | 0.172  |
| ECFP_6                                 | 683445015   | <br>[*]O[*]                         | 0.136  |
| Top Features for negative contribution |             |                                                                                                                        |        |
| Fingerprint                            | Bit/Smiles  | Feature Structure                                                                                                      | Score  |
| ECFP_6                                 | 2106656448  | <br>[*]C(=O)[*]                   | -0.275 |
|                                        |             |                                                                                                                        |        |

|        |            |                                                                                                                  |        |
|--------|------------|------------------------------------------------------------------------------------------------------------------|--------|
| ECFP_6 | 1996767644 | 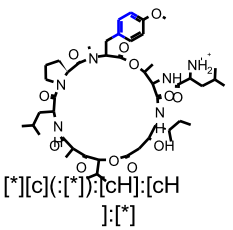<br>[*][c](:[*])[cH]:[cH]:[*] | -0.251 |
| ECFP_6 | 642810091  | <br>[*][c](:[*]):[*]          | -0.247 |



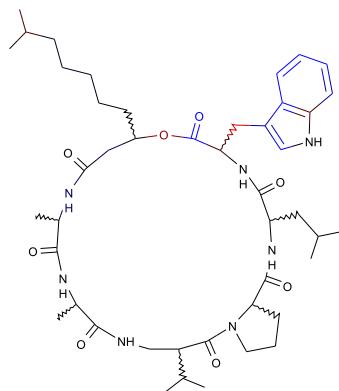
$$\text{C}_{45}\text{H}_{69}\text{N}_7\text{O}_8$$

Molecular Weight: 836.07145

|ALogP: 4.986

Rotatable Bonds: 11

Acceptors: 8

Donors: 6

## Model Prediction

Prediction: 3.037

Unit: mg/kg\_body\_weight/day

Mahalanobis Distance: 15.562

Mahalanobis Distance p-value: 8.51e-015

**Mahalanobis Distance:** The Mahalanobis distance (MD) is a generalization of the Euclidean distance that accounts for correlations among the X properties. It is calculated as the distance to the center of the training data. The larger the MD, the less trustworthy the prediction.

Mahalanobis Distance p-value: The p-value gives the fraction of training data with an MD greater than or equal to the one for the given sample, assuming normally distributed data. The smaller the p-value, the less trustworthy the prediction. For highly non-normal X properties (e.g., fingerprints), the MD p-value is wildly inaccurate.

## Structural Similar Compounds

| Name                        | 532                                                                                 | 338                                                                                 | Cyclochlorotine                                                                     |
|-----------------------------|-------------------------------------------------------------------------------------|-------------------------------------------------------------------------------------|-------------------------------------------------------------------------------------|
| Structure                   | 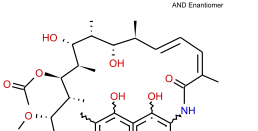 |  |  |
| Actual Endpoint (-log C)    | 4.38903                                                                             | 4.39533                                                                             | 4.36142                                                                             |
| Predicted Endpoint (-log C) | 5.60554                                                                             | 4.31268                                                                             | 4.0834                                                                              |
| Distance                    | 1.049                                                                               | 1.074                                                                               | 1.170                                                                               |
| Reference                   | CPDB                                                                                | CPDB                                                                                | CPDB                                                                                |

## Model Applicability

Unknown features are fingerprint features in the query molecule, but not found in the training set.

1. All properties and OPS components are within expected ranges.
2. Unknown ECFP\_2 feature: -1020449580: [\*][c]1:[\*]:[\*]:[nH]:c:1
3. Unknown ECFP\_2 feature: 771121623: [\*]C(\*)C[c](:[\*]):[\*]
4. Unknown ECFP\_2 feature: -1886208901: [\*]OC(=O)C(\*)[\*]
5. Unknown ECFP\_2 feature: 1863041499: [\*]NC(C)C(=[\*])[\*]
6. Unknown ECFP\_2 feature: -1457159889: [\*]NCC(\*)[\*]
7. Unknown ECFP\_2 feature: -2096927833: [\*]CC(C(\*)[\*])C(=[\*])[\*]
8. Unknown ECFP\_2 feature: -1167589895: [\*]C(\*)C(C)C
9. Unknown ECFP\_2 feature: -84540346: [\*]C(\*)CC(\*)[\*]

## Feature Contribution

| Top features for positive contribution |            |                   |       |
|----------------------------------------|------------|-------------------|-------|
| Fingerprint                            | Bit/Smiles | Feature Structure | Score |
|                                        |            |                   |       |

|                                        |            |                                                                                                                                   |        |
|----------------------------------------|------------|-----------------------------------------------------------------------------------------------------------------------------------|--------|
| ECFP_6                                 | 1559650422 | 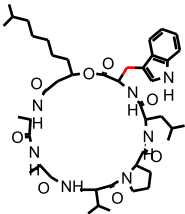<br>[*]C[*]                                    | 0.203  |
| ECFP_6                                 | 683445015  | <br>[*]O[*]                                    | 0.136  |
| ECFP_6                                 | 1333660716 | <br>[*][c]1:[*]:[*][c](<br>[*]):[c]:1:[cH]:[*] | 0.075  |
| Top Features for negative contribution |            |                                                                                                                                   |        |
| Fingerprint                            | Bit/Smiles | Feature Structure                                                                                                                 | Score  |
| ECFP_6                                 | 2106656448 | <br>[*]C(=O)[*]                              | -0.275 |
| ECFP_6                                 | 1996767644 | <br>[*][c](:[*]):[cH]:[cH<br>]:[*]           | -0.251 |

ECFP\_6

642810091

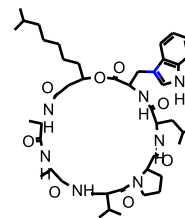

[\*][c](:[\*]):[\*]

-0.247

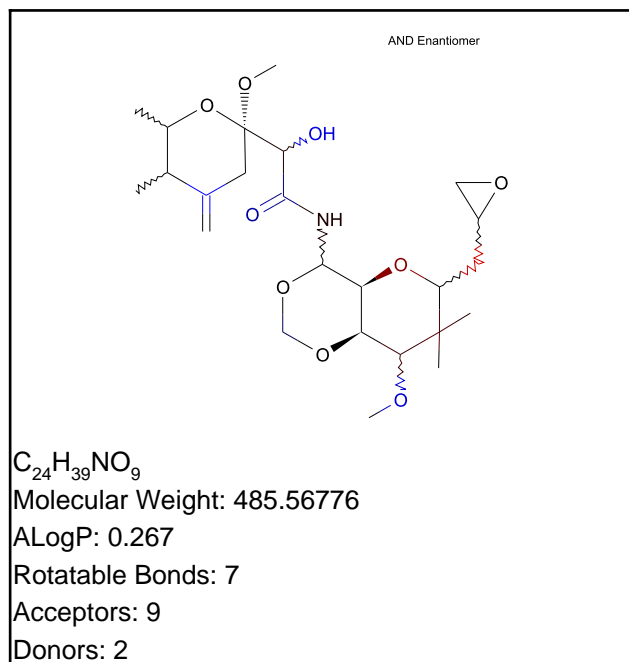

### Model Prediction

Prediction: 7.360

Unit: mg/kg\_body\_weight/day

Mahalanobis Distance: 15.940

Mahalanobis Distance p-value: 5.38e-016

Mahalanobis Distance: The Mahalanobis distance (MD) is a generalization of the Euclidean distance that accounts for correlations among the X properties. It is calculated as the distance to the center of the training data. The larger the MD, the less trustworthy the prediction.

Mahalanobis Distance p-value: The p-value gives the fraction of training data with an MD greater than or equal to the one for the given sample, assuming normally distributed data. The smaller the p-value, the less trustworthy the prediction. For highly non-normal X properties (e.g., fingerprints), the MD p-value is wildly inaccurate.

### Structural Similar Compounds

| Name                        | T-2 toxin                                                                           | Riddelliine                                                                         | Lovastatin                                                                          |
|-----------------------------|-------------------------------------------------------------------------------------|-------------------------------------------------------------------------------------|-------------------------------------------------------------------------------------|
| Structure                   | 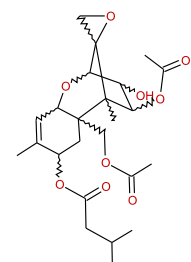 |  |  |
| Actual Endpoint (-log C)    | 5.72291                                                                             | 5.24883                                                                             | 2.89515                                                                             |
| Predicted Endpoint (-log C) | 3.92553                                                                             | 4.57392                                                                             | 3.9059                                                                              |
| Distance                    | 0.620                                                                               | 0.842                                                                               | 0.906                                                                               |
| Reference                   | CPDB                                                                                | CPDB                                                                                | CPDB                                                                                |

### Model Applicability

Unknown features are fingerprint features in the query molecule, but not found in the training set.

1. All properties and OPS components are within expected ranges.
2. Unknown ECFP\_2 feature: -194719409: [\*]C([\*])OC([\*])([\*])[\*]
3. Unknown ECFP\_2 feature: 1667686968: [\*]C([\*])([\*])OC
4. Unknown ECFP\_2 feature: 1067196438: [\*]C([\*])C(C)(C)C([\*])[\*]
5. Unknown ECFP\_2 feature: -48623642: [\*]CC(O[\*])C([\*])([\*])[\*]
6. Unknown ECFP\_2 feature: -83576333: [\*]C([\*])CC1[\*][\*]1
7. Unknown ECFP\_2 feature: -457637478: [\*]NC(O[\*])C([\*])[\*]
8. Unknown ECFP\_2 feature: 837844420: [\*]CC(O[\*])(O[\*])C([\*])[\*]
9. Unknown ECFP\_2 feature: 825070174: [\*]C(=[\*])C(O)C([\*])([\*])[\*]
10. Unknown ECFP\_2 feature: 1863511924: [\*]C([\*])C(C)C(=[\*])[\*]
11. Unknown ECFP\_2 feature: 1535429263: [\*]OC(C)C([\*])[\*]
12. Unknown ECFP\_2 feature: 1377749300: [\*]CC(=C)C([\*])[\*]

### Feature Contribution

#### Top features for positive contribution

| Fingerprint | Bit/Smiles | Feature Structure | Score |
|-------------|------------|-------------------|-------|
|             |            |                   |       |

|                                        |             |                                                                                                                       |        |
|----------------------------------------|-------------|-----------------------------------------------------------------------------------------------------------------------|--------|
| ECFP_6                                 | 1559650422  | 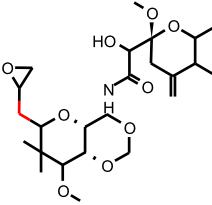<br><chem>[*]C[*]</chem>           | 0.203  |
| ECFP_6                                 | 683445015   | <br><chem>[*]O[*]</chem>           | 0.136  |
| ECFP_6                                 | 657586427   | <br><chem>[*]C([*])([*])[*]</chem> | 0.079  |
| Top Features for negative contribution |             |                                                                                                                       |        |
| Fingerprint                            | Bit/Smiles  | Feature Structure                                                                                                     | Score  |
| ECFP_6                                 | 642810091   | <br><chem>[*][c](:[*]):[*]</chem> | -0.247 |
| ECFP_6                                 | -1884411803 | <br><chem>[*]O</chem>            | -0.217 |

|        |             |                                                                                                                                                                                                                                                                                                                                                                                                                                                                    |        |
|--------|-------------|--------------------------------------------------------------------------------------------------------------------------------------------------------------------------------------------------------------------------------------------------------------------------------------------------------------------------------------------------------------------------------------------------------------------------------------------------------------------|--------|
| ECFP_6 | -1059365320 | 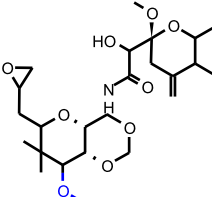 <p>Chemical structure diagram showing a complex molecule. It features a morpholine ring (a six-membered ring with two oxygen atoms) substituted with an epoxide (three-membered ring with one oxygen atom) and a hydroxyl group (OH). A methoxy group (OCH<sub>3</sub>) is also present. The structure is labeled with a blue oxygen atom and the text "[*]O[*]" below it.</p> | -0.184 |
|--------|-------------|--------------------------------------------------------------------------------------------------------------------------------------------------------------------------------------------------------------------------------------------------------------------------------------------------------------------------------------------------------------------------------------------------------------------------------------------------------------------|--------|

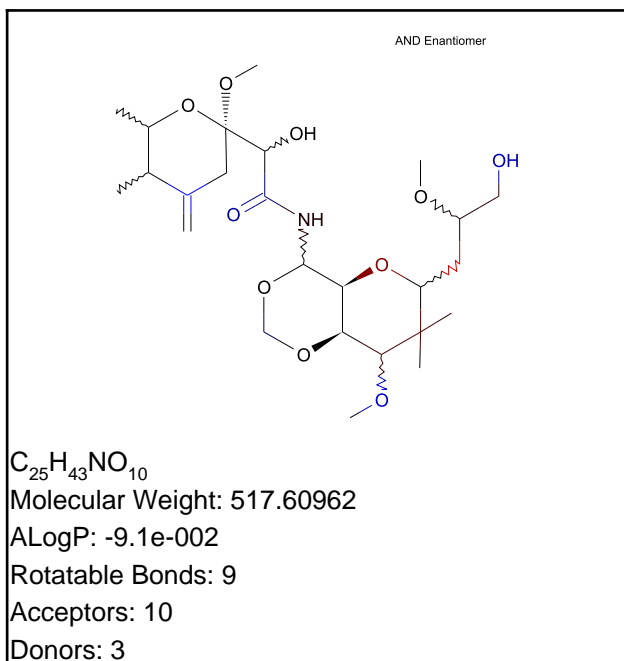

### Model Prediction

Prediction: 12.564

Unit: mg/kg\_body\_weight/day

Mahalanobis Distance: 15.470

Mahalanobis Distance p-value: 1.64e-014

Mahalanobis Distance: The Mahalanobis distance (MD) is a generalization of the Euclidean distance that accounts for correlations among the X properties. It is calculated as the distance to the center of the training data. The larger the MD, the less trustworthy the prediction.

Mahalanobis Distance p-value: The p-value gives the fraction of training data with an MD greater than or equal to the one for the given sample, assuming normally distributed data. The smaller the p-value, the less trustworthy the prediction. For highly non-normal X properties (e.g., fingerprints), the MD p-value is wildly inaccurate.

### Structural Similar Compounds

| Name                        | T-2 toxin                                                                           | Salicylazosulfapyridine                                                             | a-Ecdysone                                                                          |
|-----------------------------|-------------------------------------------------------------------------------------|-------------------------------------------------------------------------------------|-------------------------------------------------------------------------------------|
| Structure                   | 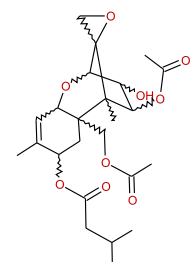 |  |  |
| Actual Endpoint (-log C)    | 5.72291                                                                             | 2.5034                                                                              | 7.11323                                                                             |
| Predicted Endpoint (-log C) | 3.92553                                                                             | 3.54214                                                                             | 4.88091                                                                             |
| Distance                    | 0.743                                                                               | 0.920                                                                               | 0.935                                                                               |
| Reference                   | CPDB                                                                                | CPDB                                                                                | CPDB                                                                                |

### Model Applicability

Unknown features are fingerprint features in the query molecule, but not found in the training set.

1. All properties and OPS components are within expected ranges.
2. Unknown ECFP\_2 feature: -410173153: [\*]C([\*])OC
3. Unknown ECFP\_2 feature: -194719409: [\*]C([\*])OC([\*])([\*])[\*]
4. Unknown ECFP\_2 feature: 1667686968: [\*]C([\*])([\*])OC
5. Unknown ECFP\_2 feature: 1067196438: [\*]C([\*])C(C)(C)C([\*])[\*]
6. Unknown ECFP\_2 feature: -48623642: [\*]CC(O[\*])C([\*])([\*])[\*]
7. Unknown ECFP\_2 feature: -84540346: [\*]C([\*])CC([\*])[\*]
8. Unknown ECFP\_2 feature: -457637478: [\*]NC(O[\*])C([\*])[\*]
9. Unknown ECFP\_2 feature: 837844420: [\*]CC(O[\*])(O[\*])C([\*])[\*]
10. Unknown ECFP\_2 feature: 825070174: [\*]C(=[\*])C(O)C([\*])([\*])[\*]
11. Unknown ECFP\_2 feature: 1863511924: [\*]C([\*])C(C)C(=[\*])[\*]
12. Unknown ECFP\_2 feature: 1535429263: [\*]OC(C)C([\*])[\*]
13. Unknown ECFP\_2 feature: 1377749300: [\*]CC(=C)C([\*])[\*]

### Feature Contribution

#### Top features for positive contribution

| Fingerprint | Bit/Smiles | Feature Structure | Score |
|-------------|------------|-------------------|-------|
|             |            |                   |       |

| ECFP_6                                 | 1559650422  | 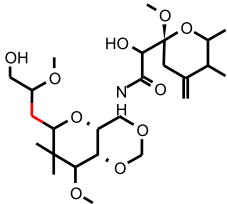<br>[*]C[*]            | 0.203  |
|----------------------------------------|-------------|-----------------------------------------------------------------------------------------------------------|--------|
| ECFP_6                                 | 683445015   | <br>[*]O[*]            | 0.136  |
| ECFP_6                                 | 657586427   | <br>[*]C([*])([*])[*]  | 0.079  |
| Top Features for negative contribution |             |                                                                                                           |        |
| Fingerprint                            | Bit/Smiles  | Feature Structure                                                                                         | Score  |
| ECFP_6                                 | 642810091   | <br>[*][c](:[*]):[*] | -0.247 |
| ECFP_6                                 | -1884411803 | <br>[*]O             | -0.217 |



|        |             |                                                                                                             |        |
|--------|-------------|-------------------------------------------------------------------------------------------------------------|--------|
| ECFP_6 | -1059365320 | 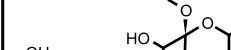<br><chem>[*]O[*]</chem> | -0.184 |
|--------|-------------|-------------------------------------------------------------------------------------------------------------|--------|

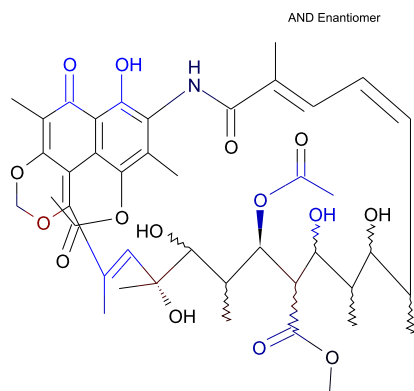

$C_{42}H_{53}NO_{15}$

Molecular Weight: 811.86791

ALogP: 2.745

Rotatable Bonds: 6

Acceptors: 15

Donors: 6

## Model Prediction

Prediction: 12.946

Unit: mg/kg\_body\_weight/day

Mahalanobis Distance: 14.885

Mahalanobis Distance p-value: 9.85e-013

Mahalanobis Distance: The Mahalanobis distance (MD) is a generalization of the Euclidean distance that accounts for correlations among the X properties. It is calculated as the distance to the center of the training data. The larger the MD, the less trustworthy the prediction.

Mahalanobis Distance p-value: The p-value gives the fraction of training data with an MD greater than or equal to the one for the given sample, assuming normally distributed data. The smaller the p-value, the less trustworthy the prediction. For highly non-normal X properties (e.g., fingerprints), the MD p-value is wildly inaccurate.

## Structural Similar Compounds

| Name                        | 532     | 380     | 338     |
|-----------------------------|---------|---------|---------|
| Structure                   |         |         |         |
| Actual Endpoint (-log C)    | 4.38903 | 4.48977 | 4.39533 |
| Predicted Endpoint (-log C) | 5.60554 | 6.22716 | 4.31268 |
| Distance                    | 0.615   | 1.180   | 1.201   |
| Reference                   | CPDB    | CPDB    | CPDB    |

## Model Applicability

Unknown features are fingerprint features in the query molecule, but not found in the training set.

1. All properties and OPS components are within expected ranges.
2. Unknown ECFP\_2 feature: -40769921: [\*]C([\*])[C@](C)(O)C=[\*]
3. Unknown ECFP\_2 feature: 464446479: [\*]C(=CC([\*])([\*])[\*])[\*]
4. Unknown ECFP\_2 feature: 1796421070: [\*]OC(=C([\*])[\*])C(=[\*])[\*]
5. Unknown ECFP\_2 feature: 1792159373: [\*]C(=C(C)C(=[\*])[\*])[\*]

## Feature Contribution

### Top features for positive contribution

| Fingerprint | Bit/Smiles | Feature Structure | Score |
|-------------|------------|-------------------|-------|
| ECFP_6      | 683445015  | <br>[*]O[*]       | 0.136 |

|                                        |            |                                                                                                                        |        |
|----------------------------------------|------------|------------------------------------------------------------------------------------------------------------------------|--------|
| ECFP_6                                 | 657586427  | 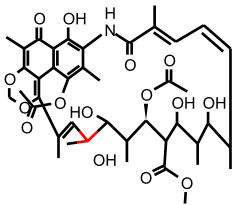<br><chem>[*]C([*])([*])[*]</chem>  | 0.079  |
| ECFP_6                                 | -167460056 | <br><chem>[*]C([*])[*]</chem>       | 0.060  |
| Top Features for negative contribution |            |                                                                                                                        |        |
| Fingerprint                            | Bit/Smiles | Feature Structure                                                                                                      | Score  |
| ECFP_6                                 | 2106656448 | <br><chem>[*]C(=O)[*]</chem>        | -0.275 |
| ECFP_6                                 | 2019062761 | <br><chem>[*]:[c](:[*])O</chem>   | -0.258 |
| ECFP_6                                 | 642810091  | <br><chem>[*][c](:[*]):[*]</chem> | -0.247 |



# Simeprevir

# TOPKAT\_Carcinogenic\_Potency\_TD50\_Mouse

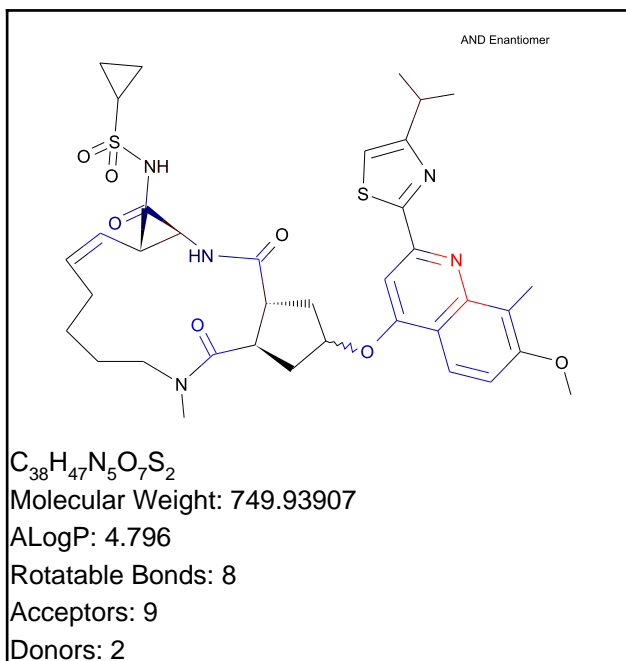

## Model Prediction

Prediction: 2.014

Unit: mg/kg\_body\_weight/day

Mahalanobis Distance: 16.839

Mahalanobis Distance p-value: 5.81e-019

Mahalanobis Distance: The Mahalanobis distance (MD) is a generalization of the Euclidean distance that accounts for correlations among the X properties. It is calculated as the distance to the center of the training data. The larger the MD, the less trustworthy the prediction.

Mahalanobis Distance p-value: The p-value gives the fraction of training data with an MD greater than or equal to the one for the given sample, assuming normally distributed data. The smaller the p-value, the less trustworthy the prediction. For highly non-normal X properties (e.g., fingerprints), the MD p-value is wildly inaccurate.

## Structural Similar Compounds

| Name                        | 223                                                                                 | D & C red no. 5                                                                     | Salicylazosulfapyridine                                                             |
|-----------------------------|-------------------------------------------------------------------------------------|-------------------------------------------------------------------------------------|-------------------------------------------------------------------------------------|
| Structure                   | 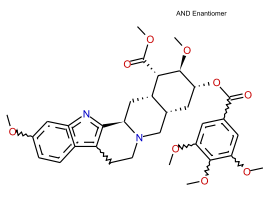 |  |  |
| Actual Endpoint (-log C)    | 5.08368                                                                             | 2.80732                                                                             | 2.5034                                                                              |
| Predicted Endpoint (-log C) | 5.08273                                                                             | 3.78615                                                                             | 3.54214                                                                             |
| Distance                    | 0.926                                                                               | 1.173                                                                               | 1.177                                                                               |
| Reference                   | CPDB                                                                                | CPDB                                                                                | CPDB                                                                                |

## Model Applicability

Unknown features are fingerprint features in the query molecule, but not found in the training set.

- OPS PC14 out of range. Value: -4.1139. Training min, max, SD, explained variance: -3.6133, 3.7483, 1.312, 0.0215.
- OPS PC16 out of range. Value: 4.4468. Training min, max, SD, explained variance: -3.1026, 4.016, 1.245, 0.0193.
- Unknown ECFP\_2 feature: -309676563: [\*]N[C@]1(C[C@H]1[\*])C(=[\*])[\*]
- Unknown ECFP\_2 feature: -1049290660: [\*]C1([\*])C[C@H]1C=[\*]
- Unknown ECFP\_2 feature: -1818486371: [\*]NC(=O)C1([\*])[\*][\*]1
- Unknown ECFP\_2 feature: 946167604: [\*]C(=[\*])NS(=[\*])(=[\*])[\*]
- Unknown ECFP\_2 feature: 1310940530: [\*]C([\*])O[c](:[\*]):[\*]
- Unknown ECFP\_2 feature: 1411720546: [\*]C([\*])[c]1:n:[\*]:[\*]:c:1
- Unknown ECFP\_2 feature: 733491677: [\*]:c](:[\*])C(C)C
- Unknown ECFP\_2 feature: 2121941848: [\*]NS(=O)(=O)C1[\*][\*]1
- Unknown ECFP\_2 feature: -622223421: [\*]S(=[\*])(=[\*])C1CC1

## Feature Contribution

### Top features for positive contribution

| Fingerprint | Bit/Smiles | Feature Structure | Score |
|-------------|------------|-------------------|-------|
|             |            |                   |       |

|                                        |            |                                                                                                                     |        |
|----------------------------------------|------------|---------------------------------------------------------------------------------------------------------------------|--------|
| ECFP_6                                 | 655739385  | 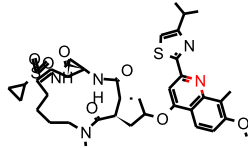<br>[*]:n:[*]                    | 0.229  |
| ECFP_6                                 | 834876373  | <br>[*][c](:[*]):n:[c](:[*]):[*] | 0.163  |
| ECFP_6                                 | 657586427  | <br>[*]C([*])([*])[*]            | 0.079  |
| Top Features for negative contribution |            |                                                                                                                     |        |
| Fingerprint                            | Bit/Smiles | Feature Structure                                                                                                   | Score  |
| ECFP_6                                 | 2106656448 | <br>[*]C(=O)[*]                | -0.275 |
| ECFP_6                                 | 1996767644 | <br>[*][c](:[*]):[cH]:[cH]:[*] | -0.251 |

ECFP\_6

642810091

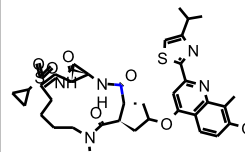

[\*][c](:[\*]):[\*]

-0.247

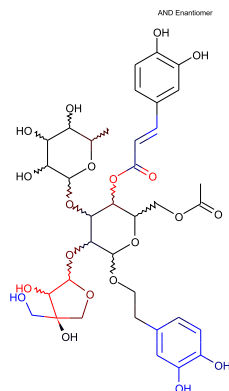

$C_{36}H_{46}O_{20}$

Molecular Weight: 798.73843

ALogP: -0.546

Rotatable Bonds: 16

Acceptors: 20

Donors: 10

## Model Prediction

Prediction: 1.086

Unit: mg/kg\_body\_weight/day

Mahalanobis Distance: 17.246

Mahalanobis Distance p-value: 1.61e-018

Mahalanobis Distance: The Mahalanobis distance (MD) is a generalization of the Euclidean distance that accounts for correlations among the X properties. It is calculated as the distance to the center of the training data. The larger the MD, the less trustworthy the prediction.

Mahalanobis Distance p-value: The p-value gives the fraction of training data with an MD greater than or equal to the one for the given sample, assuming normally distributed data. The smaller the p-value, the less trustworthy the prediction. For highly non-normal X properties (e.g., fingerprints), the MD p-value is wildly inaccurate.

## Structural Similar Compounds

| Name                        | 764     | 706     | 186     |
|-----------------------------|---------|---------|---------|
| Structure                   |         |         |         |
| Actual Endpoint (-log C)    | 5.79398 | 2.74451 | 5.72371 |
| Predicted Endpoint (-log C) | 4.15405 | 4.36978 | 5.06873 |
| Distance                    | 1.386   | 1.460   | 1.464   |
| Reference                   | CPDB    | CPDB    | CPDB    |

## Model Applicability

Unknown features are fingerprint features in the query molecule, but not found in the training set.

1. Num\_H\_Donors out of range. Value: 10. Training min, max, mean, SD: 0, 8, 1.0519, 1.223.

## Feature Contribution

### Top features for positive contribution

| Fingerprint | Bit/Smiles  | Feature Structure                | Score |
|-------------|-------------|----------------------------------|-------|
| FCFP_6      | -1043250487 | <br>[*]C1[*][*]C([*])[*]<br>)C1O | 1.153 |



|                                        |             |                                                                                                                                       |        |
|----------------------------------------|-------------|---------------------------------------------------------------------------------------------------------------------------------------|--------|
| FCFP_6                                 | 565998553   | <p>AND Enantiomer</p> 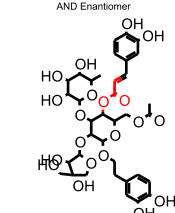 <p>[*]OC(=O)C=[*]</p>       | 0.357  |
| FCFP_6                                 | 1           | <p>AND Enantiomer</p>  <p>[*]O[*]</p>              | 0.234  |
| Top Features for negative contribution |             |                                                                                                                                       |        |
| Fingerprint                            | Bit/Smiles  | Feature Structure                                                                                                                     | Score  |
| FCFP_6                                 | -1272709286 | <p>AND Enantiomer</p>  <p>[*]C([*])([*])CO</p>     | -0.526 |
| FCFP_6                                 | 451847724   | <p>AND Enantiomer</p>  <p>[*]\C=C\C(=[*])[*]</p> | -0.436 |
| FCFP_6                                 | 7           | <p>AND Enantiomer</p>  <p>[*]O</p>               | -0.372 |



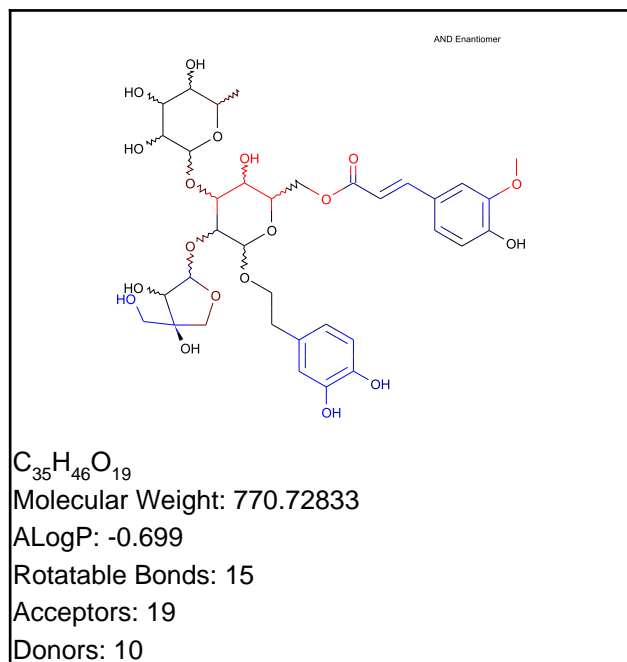

### Model Prediction

Prediction: 0.340

Unit: mg/kg\_body\_weight/day

Mahalanobis Distance: 18.842

Mahalanobis Distance p-value: 1.85e-024

Mahalanobis Distance: The Mahalanobis distance (MD) is a generalization of the Euclidean distance that accounts for correlations among the X properties. It is calculated as the distance to the center of the training data. The larger the MD, the less trustworthy the prediction.

Mahalanobis Distance p-value: The p-value gives the fraction of training data with an MD greater than or equal to the one for the given sample, assuming normally distributed data. The smaller the p-value, the less trustworthy the prediction. For highly non-normal X properties (e.g., fingerprints), the MD p-value is wildly inaccurate.

### Structural Similar Compounds

| Name                        | 764                                                                                 | 186                                                                                 | 706                                                                                 |
|-----------------------------|-------------------------------------------------------------------------------------|-------------------------------------------------------------------------------------|-------------------------------------------------------------------------------------|
| Structure                   | 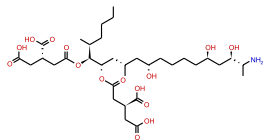 |  |  |
| Actual Endpoint (-log C)    | 5.79398                                                                             | 5.72371                                                                             | 2.74451                                                                             |
| Predicted Endpoint (-log C) | 4.15405                                                                             | 5.06873                                                                             | 4.36978                                                                             |
| Distance                    | 1.402                                                                               | 1.434                                                                               | 1.493                                                                               |
| Reference                   | CPDB                                                                                | CPDB                                                                                | CPDB                                                                                |

### Model Applicability

Unknown features are fingerprint features in the query molecule, but not found in the training set.

1. Num\_H\_Donors out of range. Value: 10. Training min, max, mean, SD: 0, 8, 1.0519, 1.223.
2. OPS PC20 out of range. Value: -4.5225. Training min, max, SD, explained variance: -3.9266, 5.5565, 1.236, 0.0147.

### Feature Contribution

#### Top features for positive contribution

| Fingerprint | Bit/Smiles  | Feature Structure                                                                                                               | Score |
|-------------|-------------|---------------------------------------------------------------------------------------------------------------------------------|-------|
| FCFP_6      | -1043250487 | 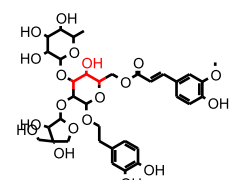<br><chem>[*]C1[*][*]C([*])([*])C1O</chem> | 1.153 |

|                                        |             |                                                                                                             |        |
|----------------------------------------|-------------|-------------------------------------------------------------------------------------------------------------|--------|
| FCFP_6                                 | 136627117   | 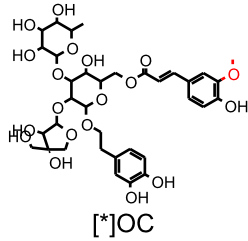<br>[*]OC                | 0.690  |
| FCFP_6                                 | 565998553   | <br>[*]OC(=O)C=[*]       | 0.357  |
| Top Features for negative contribution |             |                                                                                                             |        |
| Fingerprint                            | Bit/Smiles  | Feature Structure                                                                                           | Score  |
| FCFP_6                                 | -1272709286 | <br>[*]C([*])([*])CO     | -0.526 |
| FCFP_6                                 | 451847724   | <br>[*]\C=C\C(=[*])[*] | -0.436 |
| FCFP_6                                 | 7           | <br>[*]O               | -0.372 |



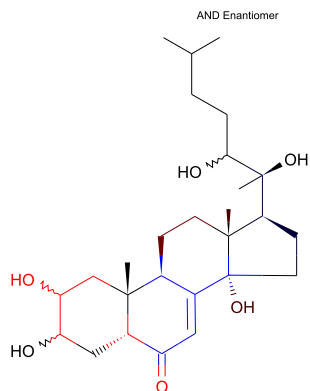
 $C_{27}H_{44}O_6$ 

Molecular Weight: 464.63466

ALogP: 2.489

Rotatable Bonds: 5

Acceptors: 6

Donors: 5

## Model Prediction

Prediction: 0.361

Unit: mg/kg\_body\_weight/day

Mahalanobis Distance: 10.702

Mahalanobis Distance p-value: 0.0425

Mahalanobis Distance: The Mahalanobis distance (MD) is a generalization of the Euclidean distance that accounts for correlations among the X properties. It is calculated as the distance to the center of the training data. The larger the MD, the less trustworthy the prediction.

Mahalanobis Distance p-value: The p-value gives the fraction of training data with an MD greater than or equal to the one for the given sample, assuming normally distributed data. The smaller the p-value, the less trustworthy the prediction. For highly non-normal X properties (e.g., fingerprints), the MD p-value is wildly inaccurate.

## Structural Similar Compounds

| Name                        | 1085    | Prednisolone | Budesonide |
|-----------------------------|---------|--------------|------------|
| Structure                   |         |              |            |
| Actual Endpoint (-log C)    | 5.37215 | 5.37215      | 6.17011    |
| Predicted Endpoint (-log C) | 5.32932 | 5.32932      | 5.6493     |
| Distance                    | 0.729   | 0.729        | 0.818      |
| Reference                   | CPDB    | CPDB         | CPDB       |

## Model Applicability

Unknown features are fingerprint features in the query molecule, but not found in the training set.

1. All properties and OPS components are within expected ranges.

## Feature Contribution

### Top features for positive contribution

| Fingerprint | Bit/Smiles  | Feature Structure             | Score |
|-------------|-------------|-------------------------------|-------|
| FCFP_6      | -1043250487 | <br>[*]C1[*][*]C([*])([*])C1O | 1.153 |

|                                        |            |                                                                                                                                       |        |
|----------------------------------------|------------|---------------------------------------------------------------------------------------------------------------------------------------|--------|
| FCFP_6                                 | 565968762  | 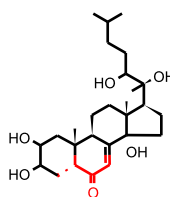<br><chem>[*]C([*])C(=O)C=[*]</chem>               | 0.266  |
| FCFP_6                                 | 1          | <br><chem>[*]O[*]</chem>                           | 0.234  |
| Top Features for negative contribution |            |                                                                                                                                       |        |
| Fingerprint                            | Bit/Smiles | Feature Structure                                                                                                                     | Score  |
| FCFP_6                                 | 451847724  | <br><chem>[*]C=C\C([*])[*]</chem>                  | -0.436 |
| FCFP_6                                 | 436886043  | <br><chem>[*]C=C/C([*])[*])\C([*])([*])[*]</chem> | -0.383 |
| FCFP_6                                 | 0          | <br><chem>[*]C([*])[*]</chem>                    | -0.115 |





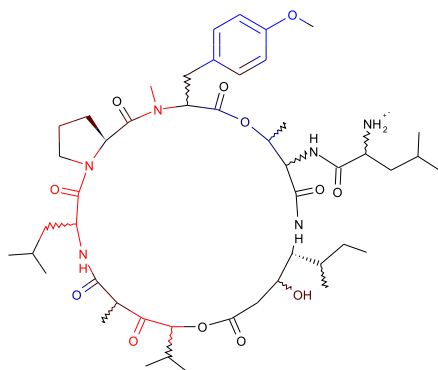

$C_{49}H_{79}N_6O_{12}$

Molecular Weight: 944.18455

ALogP: 3.176

Rotatable Bonds: 13

Acceptors: 12

Donors: 5

## Model Prediction

Prediction: 0.053

Unit: mg/kg\_body\_weight/day

Mahalanobis Distance: 17.444

Mahalanobis Distance p-value: 3.14e-019

Mahalanobis Distance: The Mahalanobis distance (MD) is a generalization of the Euclidean distance that accounts for correlations among the X properties. It is calculated as the distance to the center of the training data. The larger the MD, the less trustworthy the prediction.

Mahalanobis Distance p-value: The p-value gives the fraction of training data with an MD greater than or equal to the one for the given sample, assuming normally distributed data. The smaller the p-value, the less trustworthy the prediction. For highly non-normal X properties (e.g., fingerprints), the MD p-value is wildly inaccurate.

## Structural Similar Compounds

| Name                        | 332     | 186     | Fumonisin B1 |
|-----------------------------|---------|---------|--------------|
| Structure                   |         |         |              |
| Actual Endpoint (-log C)    | 9.05347 | 5.72371 | 5.59603      |
| Predicted Endpoint (-log C) | 8.32884 | 5.06873 | 4.17651      |
| Distance                    | 1.305   | 1.353   | 1.357        |
| Reference                   | CPDB    | CPDB    | CPDB         |

## Model Applicability

Unknown features are fingerprint features in the query molecule, but not found in the training set.

1. All properties and OPS components are within expected ranges.
2. Unknown FCFP\_2 feature: 136418580: [\*][NH2+]C

## Feature Contribution

### Top features for positive contribution

| Fingerprint | Bit/Smiles  | Feature Structure                          | Score |
|-------------|-------------|--------------------------------------------|-------|
| FCFP_6      | -1043250487 | <br><chem>[*]C1[*][*]C([*])([*])C1O</chem> | 1.153 |

|                                        |            |                                                                                                                                     |        |
|----------------------------------------|------------|-------------------------------------------------------------------------------------------------------------------------------------|--------|
| FCFP_6                                 | 136627117  | 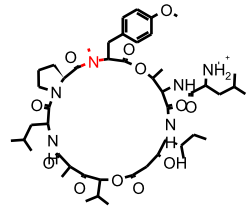<br>[*]OC                                        | 0.690  |
| FCFP_6                                 | 565998553  | <br>[*]OC(=O)C=[*]                               | 0.357  |
| Top Features for negative contribution |            |                                                                                                                                     |        |
| Fingerprint                            | Bit/Smiles | Feature Structure                                                                                                                   | Score  |
| FCFP_6                                 | 16         | <br>[*][c](:[*]):[*]                             | -0.354 |
| FCFP_6                                 | 1674451008 | <br>[*]O[c]1:[cH]:[*]:[c]<br>([*]):[cH]:[cH]:1 | -0.233 |
| FCFP_6                                 | 566058135  | <br>[*]NC(=O)C([*])[*]                         | -0.182 |



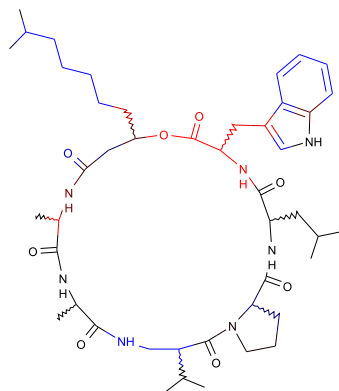

$C_{45}H_{69}N_7O_8$

Molecular Weight: 836.07145

ALogP: 4.986

Rotatable Bonds: 11

Acceptors: 8

Donors: 6

## Model Prediction

Prediction: 1.612

Unit: mg/kg\_body\_weight/day

Mahalanobis Distance: 18.754

Mahalanobis Distance p-value: 4.02e-024

Mahalanobis Distance: The Mahalanobis distance (MD) is a generalization of the Euclidean distance that accounts for correlations among the X properties. It is calculated as the distance to the center of the training data. The larger the MD, the less trustworthy the prediction.

Mahalanobis Distance p-value: The p-value gives the fraction of training data with an MD greater than or equal to the one for the given sample, assuming normally distributed data. The smaller the p-value, the less trustworthy the prediction. For highly non-normal X properties (e.g., fingerprints), the MD p-value is wildly inaccurate.

## Structural Similar Compounds

| Name                        | 551     | 411     | 188     |
|-----------------------------|---------|---------|---------|
| Structure                   |         |         |         |
| Actual Endpoint (-log C)    | 4.52736 | 3.06566 | 5.5378  |
| Predicted Endpoint (-log C) | 6.81053 | 4.8672  | 5.71925 |
| Distance                    | 1.234   | 1.235   | 1.280   |
| Reference                   | CPDB    | CPDB    | CPDB    |

## Model Applicability

Unknown features are fingerprint features in the query molecule, but not found in the training set.

1. All properties and OPS components are within expected ranges.

## Feature Contribution

### Top features for positive contribution

| Fingerprint | Bit/Smiles  | Feature Structure             | Score |
|-------------|-------------|-------------------------------|-------|
| FCFP_6      | -1043250487 | <br>[*]C1[*][*]C([*])([*])C1O | 1.153 |

|                                        |             |                                                                                                                                              |        |
|----------------------------------------|-------------|----------------------------------------------------------------------------------------------------------------------------------------------|--------|
| FCFP_6                                 | 565998553   | 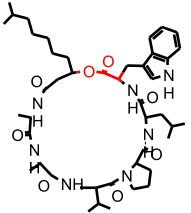<br><chem>[*]OC(=O)C=[*]</chem>                           | 0.357  |
| FCFP_6                                 | 1           | <br><chem>[*]O[*]</chem>                                  | 0.234  |
| Top Features for negative contribution |             |                                                                                                                                              |        |
| Fingerprint                            | Bit/Smiles  | Feature Structure                                                                                                                            | Score  |
| FCFP_6                                 | -1272709286 | <br><chem>[*]C([*])([*])CO</chem>                         | -0.526 |
| FCFP_6                                 | 1175638033  | <br><chem>[*]CCCCC([*])([*])</chem>                     | -0.512 |
| FCFP_6                                 | 991735244   | <br><chem>[*]:[c]1:[*]:[cH]:[cH]<br/>[cH]:[cH]:1</chem> | -0.422 |



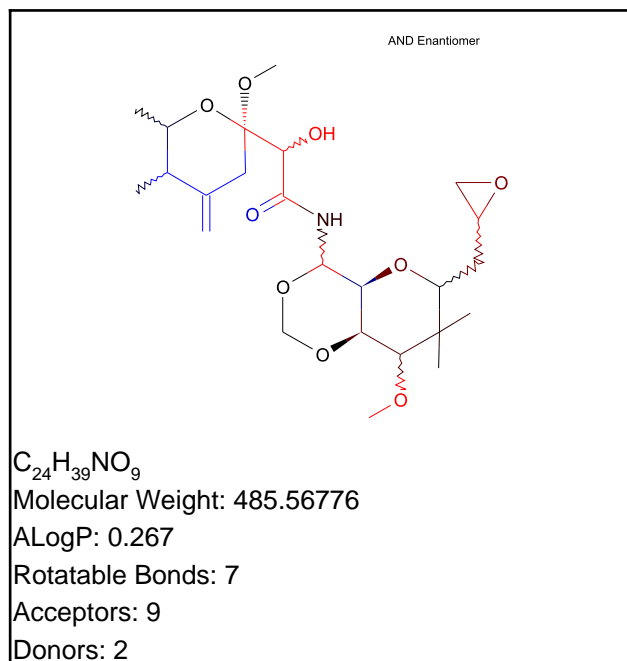

### Model Prediction

Prediction: 0.032

Unit: mg/kg\_body\_weight/day

Mahalanobis Distance: 13.800

Mahalanobis Distance p-value: 6.77e-008

Mahalanobis Distance: The Mahalanobis distance (MD) is a generalization of the Euclidean distance that accounts for correlations among the X properties. It is calculated as the distance to the center of the training data. The larger the MD, the less trustworthy the prediction.

Mahalanobis Distance p-value: The p-value gives the fraction of training data with an MD greater than or equal to the one for the given sample, assuming normally distributed data. The smaller the p-value, the less trustworthy the prediction. For highly non-normal X properties (e.g., fingerprints), the MD p-value is wildly inaccurate.

### Structural Similar Compounds

| Name                        | 199                                                                                 | Lasiocarpine                                                                        | Actinomycin D                                                                       |
|-----------------------------|-------------------------------------------------------------------------------------|-------------------------------------------------------------------------------------|-------------------------------------------------------------------------------------|
| Structure                   | 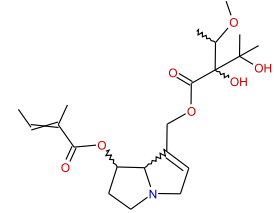 |  |  |
| Actual Endpoint (-log C)    | 5.93675                                                                             | 6.02441                                                                             | 8.6619                                                                              |
| Predicted Endpoint (-log C) | 5.63437                                                                             | 5.63437                                                                             | 6.62157                                                                             |
| Distance                    | 0.731                                                                               | 0.731                                                                               | 0.761                                                                               |
| Reference                   | CPDB                                                                                | CPDB                                                                                | CPDB                                                                                |

### Model Applicability

Unknown features are fingerprint features in the query molecule, but not found in the training set.

1. All properties and OPS components are within expected ranges.

### Feature Contribution

#### Top features for positive contribution

| Fingerprint | Bit/Smiles  | Feature Structure                                                                                                  | Score |
|-------------|-------------|--------------------------------------------------------------------------------------------------------------------|-------|
| FCFP_6      | -1043250487 | 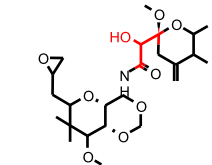<br>[*]C1[*][*]C([*])([*])C1O | 1.153 |

|                                        |             |                                                                                                                               |        |
|----------------------------------------|-------------|-------------------------------------------------------------------------------------------------------------------------------|--------|
| FCFP_6                                 | 136627117   | 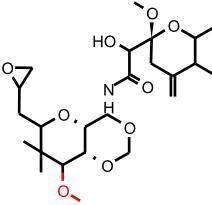<br>[*]OC                                  | 0.690  |
| FCFP_6                                 | 1           | <br>[*]O[*]                                | 0.234  |
| Top Features for negative contribution |             |                                                                                                                               |        |
| Fingerprint                            | Bit/Smiles  | Feature Structure                                                                                                             | Score  |
| FCFP_6                                 | 436886043   | <br>[*]\C=C/C([*])([*])\C<br>([*])([*])[*] | -0.383 |
| FCFP_6                                 | 566058135   | <br>[*]NC(=O)C([*])[*]                   | -0.182 |
| FCFP_6                                 | -1143715940 | <br>[*]C([*])OC([*])[*]                  | -0.124 |





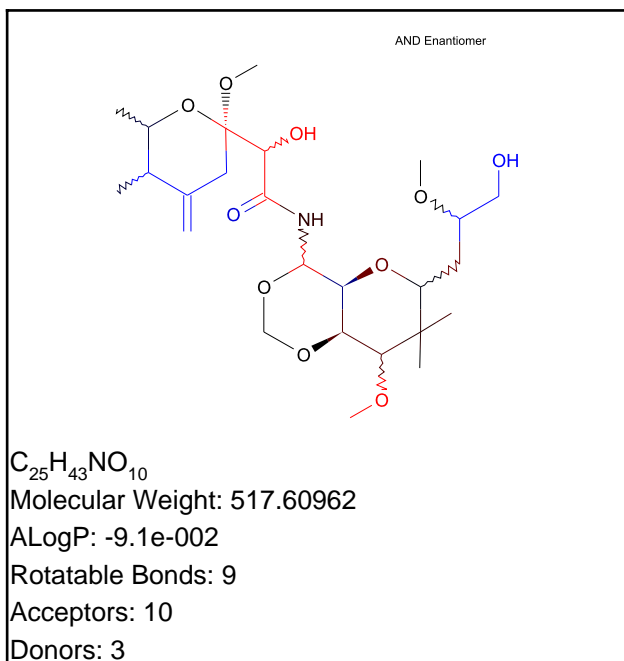

### Model Prediction

Prediction: 0.335

Unit: mg/kg\_body\_weight/day

Mahalanobis Distance: 13.235

Mahalanobis Distance p-value: 1.58e-006

Mahalanobis Distance: The Mahalanobis distance (MD) is a generalization of the Euclidean distance that accounts for correlations among the X properties. It is calculated as the distance to the center of the training data. The larger the MD, the less trustworthy the prediction.

Mahalanobis Distance p-value: The p-value gives the fraction of training data with an MD greater than or equal to the one for the given sample, assuming normally distributed data. The smaller the p-value, the less trustworthy the prediction. For highly non-normal X properties (e.g., fingerprints), the MD p-value is wildly inaccurate.

### Structural Similar Compounds

| Name                        | 199                                                                                 | Lasiocarpine                                                                        | Actinomycin D                                                                       |
|-----------------------------|-------------------------------------------------------------------------------------|-------------------------------------------------------------------------------------|-------------------------------------------------------------------------------------|
| Structure                   | 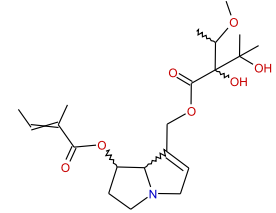 |  |  |
| Actual Endpoint (-log C)    | 5.93675                                                                             | 6.02441                                                                             | 8.6619                                                                              |
| Predicted Endpoint (-log C) | 5.63437                                                                             | 5.63437                                                                             | 6.62157                                                                             |
| Distance                    | 0.749                                                                               | 0.749                                                                               | 0.781                                                                               |
| Reference                   | CPDB                                                                                | CPDB                                                                                | CPDB                                                                                |

### Model Applicability

Unknown features are fingerprint features in the query molecule, but not found in the training set.

1. All properties and OPS components are within expected ranges.

### Feature Contribution

#### Top features for positive contribution

| Fingerprint | Bit/Smiles  | Feature Structure                                                                                                               | Score |
|-------------|-------------|---------------------------------------------------------------------------------------------------------------------------------|-------|
| FCFP_6      | -1043250487 | 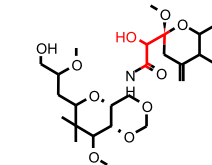<br><chem>[*]C1[*][*]C([*])([*])C1O</chem> | 1.153 |

|                                        |             |                                                                                                                               |        |
|----------------------------------------|-------------|-------------------------------------------------------------------------------------------------------------------------------|--------|
| FCFP_6                                 | 136627117   | 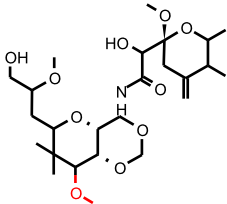<br>[*]OC                                  | 0.690  |
| FCFP_6                                 | 1           | <br>[*]O[*]                                | 0.234  |
| Top Features for negative contribution |             |                                                                                                                               |        |
| Fingerprint                            | Bit/Smiles  | Feature Structure                                                                                                             | Score  |
| FCFP_6                                 | -1272709286 | <br>[*]C([*])([*])CO                       | -0.526 |
| FCFP_6                                 | 436886043   | <br>[*]C=C/C([*])([*])C<br>([*])([*])[*] | -0.383 |
| FCFP_6                                 | 566058135   | <br>[*]NC(=O)C([*])([*])                 | -0.182 |



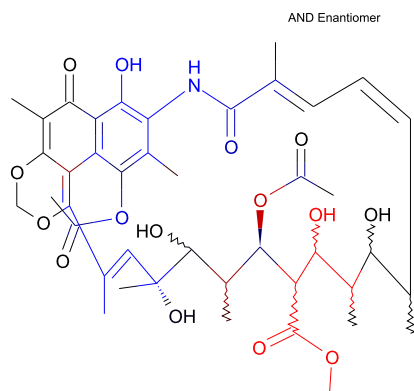

$C_{42}H_{53}NO_{15}$

Molecular Weight: 811.86791

ALogP: 2.745

Rotatable Bonds: 6

Acceptors: 15

Donors: 6

## Model Prediction

Prediction: 1.527

Unit: mg/kg\_body\_weight/day

Mahalanobis Distance: 19.242

Mahalanobis Distance p-value: 4.99e-026

Mahalanobis Distance: The Mahalanobis distance (MD) is a generalization of the Euclidean distance that accounts for correlations among the X properties. It is calculated as the distance to the center of the training data. The larger the MD, the less trustworthy the prediction.

Mahalanobis Distance p-value: The p-value gives the fraction of training data with an MD greater than or equal to the one for the given sample, assuming normally distributed data. The smaller the p-value, the less trustworthy the prediction. For highly non-normal X properties (e.g., fingerprints), the MD p-value is wildly inaccurate.

## Structural Similar Compounds

| Name                        | 186     | 424     | 188     |
|-----------------------------|---------|---------|---------|
| Structure                   |         |         |         |
| Actual Endpoint (-log C)    | 5.72371 | 4.70022 | 5.5378  |
| Predicted Endpoint (-log C) | 5.06873 | 5.67571 | 5.71925 |
| Distance                    | 1.229   | 1.239   | 1.271   |
| Reference                   | CPDB    | CPDB    | CPDB    |

## Model Applicability

Unknown features are fingerprint features in the query molecule, but not found in the training set.

1. All properties and OPS components are within expected ranges.

## Feature Contribution

### Top features for positive contribution

| Fingerprint | Bit/Smiles  | Feature Structure             | Score |
|-------------|-------------|-------------------------------|-------|
| FCFP_6      | -1043250487 | <br>[*]C1[*][*]C([*])([*])C1O | 1.153 |

|                                        |            |                                                                                                                               |        |
|----------------------------------------|------------|-------------------------------------------------------------------------------------------------------------------------------|--------|
| FCFP_6                                 | 136627117  | 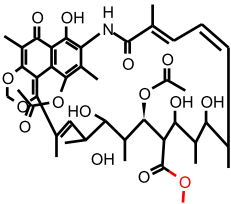<br>[*]OC                                  | 0.690  |
| FCFP_6                                 | 565998553  | <br>[*]OC(=O)C=[*]                         | 0.357  |
| Top Features for negative contribution |            |                                                                                                                               |        |
| Fingerprint                            | Bit/Smiles | Feature Structure                                                                                                             | Score  |
| FCFP_6                                 | 451847724  | <br>[*]C=C\C(=[*])[*]                      | -0.436 |
| FCFP_6                                 | 436886043  | <br>[*]C=C/C(=[*])[*])C<br>([*])([*])[*] | -0.383 |
| FCFP_6                                 | 7          | <br>[*]O                                 | -0.372 |



# Simeprevir

# TOPKAT\_Carcinogenic\_Potency\_TD50\_Rat

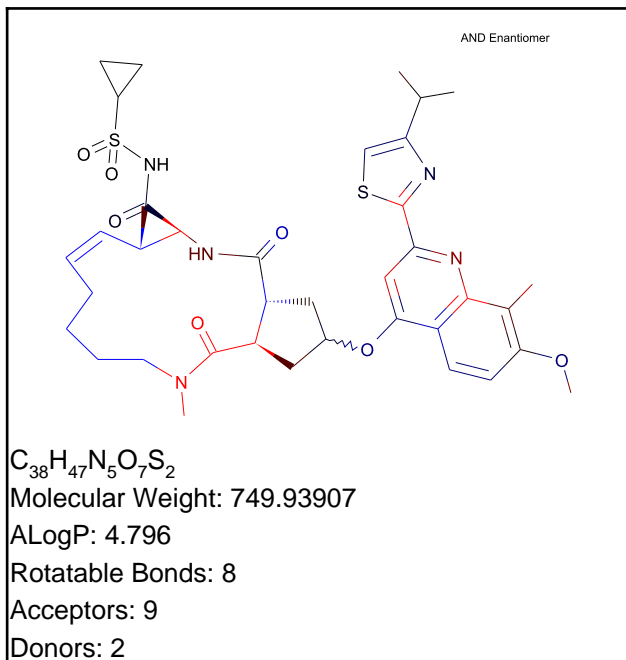

## Model Prediction

Prediction: 0.280

Unit: mg/kg\_body\_weight/day

Mahalanobis Distance: 24.067

Mahalanobis Distance p-value: 1.44e-046

Mahalanobis Distance: The Mahalanobis distance (MD) is a generalization of the Euclidean distance that accounts for correlations among the X properties. It is calculated as the distance to the center of the training data. The larger the MD, the less trustworthy the prediction.

Mahalanobis Distance p-value: The p-value gives the fraction of training data with an MD greater than or equal to the one for the given sample, assuming normally distributed data. The smaller the p-value, the less trustworthy the prediction. For highly non-normal X properties (e.g., fingerprints), the MD p-value is wildly inaccurate.

## Structural Similar Compounds

| Name                        | 411                                                                                 | 223                                                                                 | 188                                                                                 |
|-----------------------------|-------------------------------------------------------------------------------------|-------------------------------------------------------------------------------------|-------------------------------------------------------------------------------------|
| Structure                   | 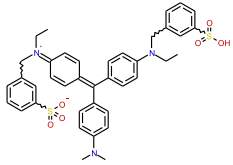 |  |  |
| Actual Endpoint (-log C)    | 3.06566                                                                             | 6.29867                                                                             | 5.5378                                                                              |
| Predicted Endpoint (-log C) | 4.8672                                                                              | 7.5657                                                                              | 5.71925                                                                             |
| Distance                    | 0.846                                                                               | 0.861                                                                               | 0.891                                                                               |
| Reference                   | CPDB                                                                                | CPDB                                                                                | CPDB                                                                                |

## Model Applicability

Unknown features are fingerprint features in the query molecule, but not found in the training set.

- OPS PC27 out of range. Value: -3.3094. Training min, max, SD, explained variance: -2.8642, 4.2058, 1.002, 0.0096.

## Feature Contribution

### Top features for positive contribution

| Fingerprint | Bit/Smiles | Feature Structure                                                                              | Score |
|-------------|------------|------------------------------------------------------------------------------------------------|-------|
| FCFP_6      | 136627117  | 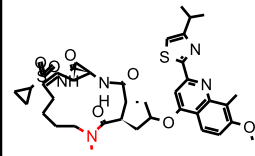<br>[*]OC | 0.690 |



|                                        |            |                                                                                                                                       |        |
|----------------------------------------|------------|---------------------------------------------------------------------------------------------------------------------------------------|--------|
| FCFP_6                                 | 565998553  | 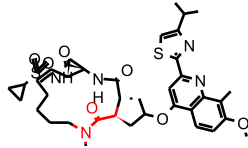<br><chem>[*]OC(=O)C=[*]</chem>                    | 0.357  |
| FCFP_6                                 | 690511177  | <br><chem>[*]:[cH]:[c]([n:[*]])[c]([*]):[*]</chem> | 0.293  |
| Top Features for negative contribution |            |                                                                                                                                       |        |
| Fingerprint                            | Bit/Smiles | Feature Structure                                                                                                                     | Score  |
| FCFP_6                                 | 1175638033 | <br><chem>[*]CCCCC([*])[*]</chem>                  | -0.512 |
| FCFP_6                                 | 451847724  | <br><chem>[*]C=C\C(=[*])[*]</chem>               | -0.436 |
| FCFP_6                                 | 16         | <br><chem>[*][c]([*]):[*]</chem>                 | -0.354 |



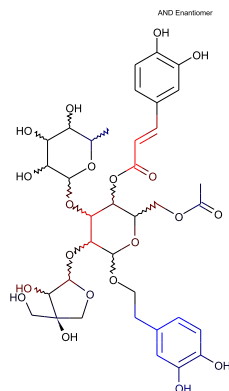

$C_{36}H_{46}O_{20}$

Molecular Weight: 798.73843

ALogP: -0.546

Rotatable Bonds: 16

Acceptors: 20

Donors: 10

## Model Prediction

Prediction: 0.040

Unit: g/kg\_body\_weight

Mahalanobis Distance: 44.607

Mahalanobis Distance p-value: 1.46e-049

Mahalanobis Distance: The Mahalanobis distance (MD) is a generalization of the Euclidean distance that accounts for correlations among the X properties. It is calculated as the distance to the center of the training data. The larger the MD, the less trustworthy the prediction.

Mahalanobis Distance p-value: The p-value gives the fraction of training data with an MD greater than or equal to the one for the given sample, assuming normally distributed data. The smaller the p-value, the less trustworthy the prediction. For highly non-normal X properties (e.g., fingerprints), the MD p-value is wildly inaccurate.

## Structural Similar Compounds

| Name                        | CARMINE                           | C.I. DIRECT BLUE 15 | OXYTETRACYCLINE .HCL |
|-----------------------------|-----------------------------------|---------------------|----------------------|
| Structure                   |                                   |                     |                      |
| Actual Endpoint (-log C)    | 3.5162                            | 4.3131              | 2.56626              |
| Predicted Endpoint (-log C) | 3.66829                           | 3.72681             | 3.75581              |
| Distance                    | 1.385                             | 1.492               | 1.728                |
| Reference                   | FOOD.CHEM.TOXICOL.2<br>5.897.1987 | NTP REPORT # 397    | NTP REPORT # 315     |

## Model Applicability

Unknown features are fingerprint features in the query molecule, but not found in the training set.

1. Num\_H\_Donors out of range. Value: 10. Training min, max, mean, SD: 0, 9, 1.0902, 1.316.
2. Unknown ECFP\_6 feature: 456242574: [\*]C([\*])OC([\*])[\*]
3. Unknown ECFP\_6 feature: -1409796893: [\*]C([\*])OC([\*])[\*]
4. Unknown ECFP\_6 feature: -1939757055: [\*]C1[\*][\*]CO1
5. Unknown ECFP\_6 feature: 456978524: [\*]C([\*])OC(=[\*])[\*]
6. Unknown ECFP\_6 feature: -1250019913: [\*]COC([\*])[\*]
7. Unknown ECFP\_6 feature: 2024749573: [\*]C([\*])O
8. Unknown ECFP\_6 feature: 2018700401: [\*]C([\*])([\*])O
9. Unknown ECFP\_6 feature: 2022454958: [\*]CO
10. Unknown ECFP\_6 feature: 2019062761: [\*]:c(:[\*])O
11. Unknown ECFP\_6 feature: 2011659532: [\*]OC(C([\*])[\*])C([\*])[\*]
12. Unknown ECFP\_6 feature: -553149446: [\*]CC(O[\*])C([\*])[\*]
13. Unknown ECFP\_6 feature: -2060414325: [\*]OC(O[\*])C([\*])[\*]
14. Unknown ECFP\_6 feature: -521596699: [\*]C1[\*][\*]C([\*])([\*])C1O
15. Unknown ECFP\_6 feature: 1953003528: [\*]C[C@@]1(O)C[\*][\*]C1[\*]
16. Unknown ECFP\_6 feature: 305695353: [\*]C([\*])C(O)C([\*])[\*]
17. Unknown ECFP\_6 feature: 414215731: [\*]C1([\*])[\*][\*]OC1
18. Unknown ECFP\_6 feature: -1687549011: [\*]OCC([\*])[\*]
19. Unknown ECFP\_6 feature: 1535429263: [\*]OC(C)C([\*])[\*]
20. Unknown ECFP\_6 feature: 1129597062: [\*]C([\*])([\*])CO

21. Unknown ECFP\_6 feature: 865482986: [\*]C([\*])C
22. Unknown ECFP\_6 feature: -1790412586: [\*]CCO[\*]
23. Unknown ECFP\_6 feature: -1684512787: [\*]OC(=O)C=[\*]
24. Unknown ECFP\_6 feature: -1795525632: [\*]CC[c](:[\*]):[\*]
25. Unknown ECFP\_6 feature: -473922720: [\*]OC(=O)C
26. Unknown ECFP\_6 feature: -470416293: [\*]C=C\C(=[\*])[\*]
27. Unknown ECFP\_6 feature: -1831055759: [\*]C=C[c](:[\*]):[\*]
28. Unknown ECFP\_6 feature: -176483725: [\*]=C[c](:[cH]:[\*]):[cH]:[\*]

## Feature Contribution

| Top features for positive contribution |             |                                                                                                                                        |       |
|----------------------------------------|-------------|----------------------------------------------------------------------------------------------------------------------------------------|-------|
| Fingerprint                            | Bit/Smiles  | Feature Structure                                                                                                                      | Score |
| FCFP_6                                 | 451847724   | <p>AND Enantiomer</p> 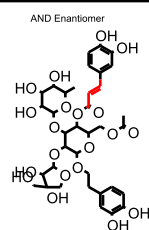 <p>[*]C=C\C(=[*])[*]</p>     | 0.160 |
| ECFP_6                                 | -167460056  | <p>AND Enantiomer</p>  <p>[*]C([*])[*]</p>         | 0.136 |
| FCFP_6                                 | -1143715940 | <p>AND Enantiomer</p>  <p>[*]C([*])OC([*])[*]</p> | 0.130 |
| Top Features for negative contribution |             |                                                                                                                                        |       |
| Fingerprint                            | Bit/Smiles  | Feature Structure                                                                                                                      | Score |
|                                        |             |                                                                                                                                        |       |

|        |            |                                                                                                                                                           |        |
|--------|------------|-----------------------------------------------------------------------------------------------------------------------------------------------------------|--------|
| FCFP_6 | 1          | <p>AND Enantiomer</p> 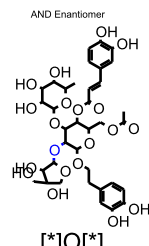 <p>[*]O[*]</p>                                   | -0.102 |
| FCFP_6 | -453677277 | <p>AND Enantiomer</p>  <p>[*]C[c]1:[cH]:[*]c<br/>([*]):[cH]:[cH]:1</p> | -0.091 |
| FCFP_6 | 136597326  | <p>AND Enantiomer</p>  <p>[*]C([*])C</p>                               | -0.081 |

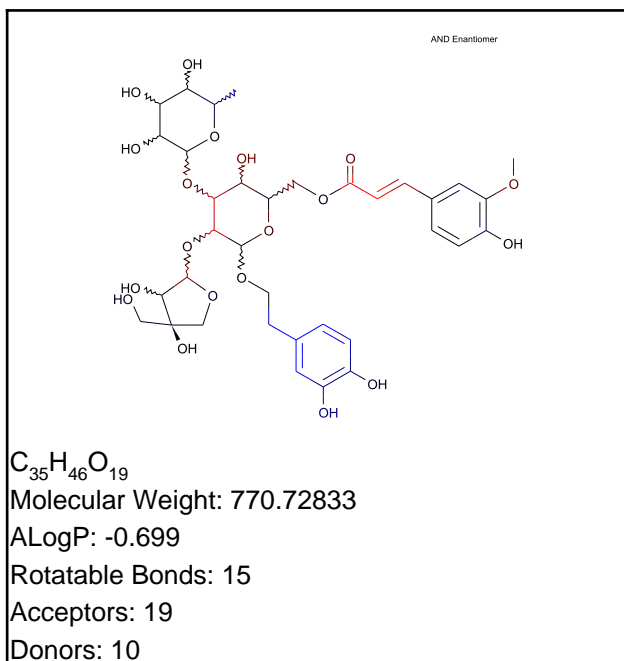

### Model Prediction

Prediction: 0.017

Unit: g/kg\_body\_weight

Mahalanobis Distance: 45.301

Mahalanobis Distance p-value: 1.23e-050

Mahalanobis Distance: The Mahalanobis distance (MD) is a generalization of the Euclidean distance that accounts for correlations among the X properties. It is calculated as the distance to the center of the training data. The larger the MD, the less trustworthy the prediction.

Mahalanobis Distance p-value: The p-value gives the fraction of training data with an MD greater than or equal to the one for the given sample, assuming normally distributed data. The smaller the p-value, the less trustworthy the prediction. For highly non-normal X properties (e.g., fingerprints), the MD p-value is wildly inaccurate.

### Structural Similar Compounds

| Name                        | CARMINE                                                                             | C.I. DIRECT BLUE 15                                                                 | OXYTETRACYCLINE .HCL                                                                |
|-----------------------------|-------------------------------------------------------------------------------------|-------------------------------------------------------------------------------------|-------------------------------------------------------------------------------------|
| Structure                   | 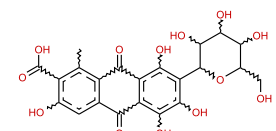 |  |  |
| Actual Endpoint (-log C)    | 3.5162                                                                              | 4.3131                                                                              | 2.56626                                                                             |
| Predicted Endpoint (-log C) | 3.66829                                                                             | 3.72681                                                                             | 3.75581                                                                             |
| Distance                    | 1.278                                                                               | 1.541                                                                               | 1.612                                                                               |
| Reference                   | FOOD.CHEM.TOXICOL.2<br>5.897.1987                                                   | NTP REPORT # 397                                                                    | NTP REPORT # 315                                                                    |

### Model Applicability

Unknown features are fingerprint features in the query molecule, but not found in the training set.

1. Num\_H\_Donors out of range. Value: 10. Training min, max, mean, SD: 0, 9, 1.0902, 1.316.
2. Unknown ECFP\_6 feature: 456242574: [\*]C([\*])OC([\*])[\*]
3. Unknown ECFP\_6 feature: -1409796893: [\*]C([\*])OC([\*])[\*]
4. Unknown ECFP\_6 feature: -1939757055: [\*]C1[\*][\*]CO1
5. Unknown ECFP\_6 feature: -1250019913: [\*]COC([\*])[\*]
6. Unknown ECFP\_6 feature: 2024749573: [\*]C([\*])O
7. Unknown ECFP\_6 feature: 2018700401: [\*]C([\*])([\*])O
8. Unknown ECFP\_6 feature: 2022454958: [\*]CO
9. Unknown ECFP\_6 feature: 2019062761: [\*]:c(:[\*])O
10. Unknown ECFP\_6 feature: 1307307440: [\*]:c(:[\*])OC
11. Unknown ECFP\_6 feature: 2011659532: [\*]OC(C([\*])[\*])C([\*])[\*]
12. Unknown ECFP\_6 feature: 305695353: [\*]C([\*])C(O)C([\*])[\*]
13. Unknown ECFP\_6 feature: -553149446: [\*]CC(O[\*])C([\*])[\*]
14. Unknown ECFP\_6 feature: -2060414325: [\*]OC(O[\*])C([\*])[\*]
15. Unknown ECFP\_6 feature: -521596699: [\*]C1[\*][\*]C([\*])([\*])C1O
16. Unknown ECFP\_6 feature: 1953003528: [\*]C[C@@]1(O)C[\*][\*]C1[\*]
17. Unknown ECFP\_6 feature: 414215731: [\*]C1([\*])[\*][\*]OC1
18. Unknown ECFP\_6 feature: 1535429263: [\*]OC(C([\*])[\*])
19. Unknown ECFP\_6 feature: -1687549011: [\*]OCC([\*])[\*]
20. Unknown ECFP\_6 feature: 1129597062: [\*]C([\*])([\*])CO

21. Unknown ECFP\_6 feature: 865482986: [\*]C([\*])C
22. Unknown ECFP\_6 feature: -1790412586: [\*]CCO[\*]
23. Unknown ECFP\_6 feature: -1795525632: [\*]CC[c](:[\*]):[\*]
24. Unknown ECFP\_6 feature: -1684512787: [\*]OC(=O)C=[\*]
25. Unknown ECFP\_6 feature: -470416293: [\*]C=C\C(=[\*])[\*]
26. Unknown ECFP\_6 feature: -1831055759: [\*]C=C[c](:[\*]):[\*]
27. Unknown ECFP\_6 feature: -176483725: [\*]=C[c](:[cH]:[\*]):[cH]:[\*]

## Feature Contribution

### Top features for positive contribution

| Fingerprint | Bit/Smiles  | Feature Structure                                                                                                         | Score |
|-------------|-------------|---------------------------------------------------------------------------------------------------------------------------|-------|
| FCFP_6      | 451847724   | 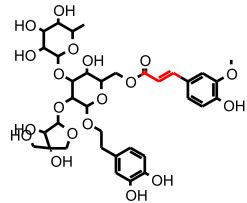<br><chem>[*]C=C\C(=[*])[*]</chem>     | 0.160 |
| ECFP_6      | -167460056  | <br><chem>[*]C([*])[*]</chem>          | 0.136 |
| FCFP_6      | -1143715940 | <br><chem>[*]C([*])OC([*])[*]</chem> | 0.130 |

### Top Features for negative contribution

| Fingerprint | Bit/Smiles | Feature Structure | Score |
|-------------|------------|-------------------|-------|
|             |            |                   |       |

|        |            |                                                                                                                                   |        |
|--------|------------|-----------------------------------------------------------------------------------------------------------------------------------|--------|
| FCFP_6 | 1          | 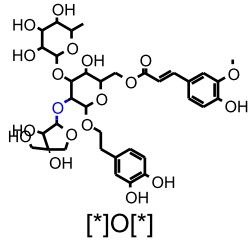<br>[*]O[*]                                    | -0.102 |
| FCFP_6 | -453677277 | <br>[*]C[c]1:[cH]:[*]:[c]<br>([*]):[cH]:[cH]:1 | -0.091 |
| FCFP_6 | 136597326  | <br>[*]C([*])C                                 | -0.081 |



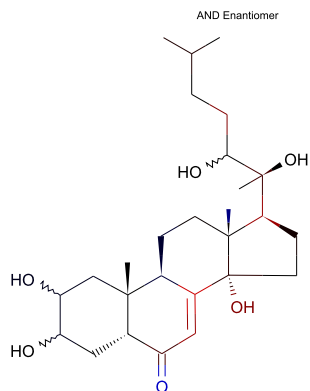
 $C_{27}H_{44}O_6$ 

Molecular Weight: 464.63466

ALogP: 2.489

Rotatable Bonds: 5

Acceptors: 6

Donors: 5

## Model Prediction

Prediction: 0.017

Unit: g/kg\_body\_weight

Mahalanobis Distance: 26.168

Mahalanobis Distance p-value: 1.14e-017

Mahalanobis Distance: The Mahalanobis distance (MD) is a generalization of the Euclidean distance that accounts for correlations among the X properties. It is calculated as the distance to the center of the training data. The larger the MD, the less trustworthy the prediction.

Mahalanobis Distance p-value: The p-value gives the fraction of training data with an MD greater than or equal to the one for the given sample, assuming normally distributed data. The smaller the p-value, the less trustworthy the prediction. For highly non-normal X properties (e.g., fingerprints), the MD p-value is wildly inaccurate.

## Structural Similar Compounds

| Name                        | PRAVASTATIN | THIOPHANATE METHYL              | GLIPIZIDE |
|-----------------------------|-------------|---------------------------------|-----------|
| Structure                   |             |                                 |           |
| Actual Endpoint (-log C)    | 3.62791     | 4.02937                         | 3.94991   |
| Predicted Endpoint (-log C) | 4.37763     | 3.44906                         | 3.95594   |
| Distance                    | 0.688       | 0.886                           | 0.889     |
| Reference                   | NDA-19898   | EPA COVER SHEET 0117;880301;(1) | NDA-17583 |

## Model Applicability

Unknown features are fingerprint features in the query molecule, but not found in the training set.

- OPS PC13 out of range. Value: -6.1434. Training min, max, SD, explained variance: -5.6594, 6.6668, 2.119, 0.0196.
- Unknown ECFP\_6 feature: 2018700401: [\*]C([\*])([\*])O
- Unknown ECFP\_6 feature: 2025123907: [\*]C([\*])([\*])O
- Unknown ECFP\_6 feature: 2024749573: [\*]C([\*])O
- Unknown ECFP\_6 feature: 2023785560: [\*]C([\*])O
- Unknown ECFP\_6 feature: 1908990050: [\*]C[C@]1(C)[C@@H]([\*])[\*]C1([\*])[\*]
- Unknown ECFP\_6 feature: -483166673: [\*]C(=[\*])[C@]1(O)C[\*][\*]C1([\*])[\*]
- Unknown ECFP\_6 feature: -1049278438: [\*]C([\*])([\*])[C@H]1C[\*][\*]C1([\*])[\*]
- Unknown ECFP\_6 feature: 333674688: [\*]C[C@@H](C(=[\*])[\*])C([\*])([\*])[\*]
- Unknown ECFP\_6 feature: -84975114: [\*]CC(C)(C([\*])[\*])C([\*])[\*]
- Unknown ECFP\_6 feature: 412256466: [\*]CCC([\*])([\*])[\*]
- Unknown ECFP\_6 feature: 1908695621: [\*]C=C(/C([\*])[\*])\C([\*])([\*])[\*]
- Unknown ECFP\_6 feature: 1195714366: [\*]C([\*])C(C)(O)C([\*])[\*]
- Unknown ECFP\_6 feature: 859433814: [\*]C([\*])([\*])C
- Unknown ECFP\_6 feature: 413587124: [\*]C([\*])CC([\*])([\*])[\*]
- Unknown ECFP\_6 feature: 464808839: [\*]C(=CC(=[\*])[\*])[\*]
- Unknown ECFP\_6 feature: -801490360: [\*]C([\*])CC([\*])[\*]
- Unknown ECFP\_6 feature: -211745668: [\*]C([\*])C(=O)C=[\*]
- Unknown ECFP\_6 feature: -329826665: [\*]CC(O)C([\*])[\*]

20. Unknown ECFP\_6 feature: 80071435: [\*]CC(O)C([\*])([\*])[\*]
21. Unknown ECFP\_6 feature: 865857320: [\*]C([\*])([\*])C
22. Unknown ECFP\_6 feature: -1790802833: [\*]CCC([\*])[\*]
23. Unknown ECFP\_6 feature: 1035165602: [\*]CC(C)C

## Feature Contribution

### Top features for positive contribution

| Fingerprint | Bit/Smiles | Feature Structure                                                                                                     | Score |
|-------------|------------|-----------------------------------------------------------------------------------------------------------------------|-------|
| FCFP_6      | 451847724  | 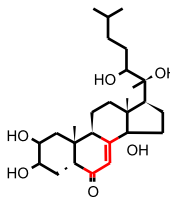<br><chem>[*]C=C\C(=[*])[*]</chem> | 0.160 |
| ECFP_6      | -167460056 | <br><chem>[*]C([*])[*]</chem>      | 0.136 |
| ECFP_6      | 1559650422 | <br><chem>[*]C[*]</chem>          | 0.129 |

### Top Features for negative contribution

| Fingerprint | Bit/Smiles | Feature Structure | Score |
|-------------|------------|-------------------|-------|
|             |            |                   |       |

|        |            |                                                                                                                |        |
|--------|------------|----------------------------------------------------------------------------------------------------------------|--------|
| ECFP_6 | 2106656448 | 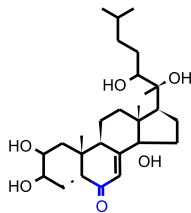<br><chem>[*]C(=O)[*]</chem> | -0.110 |
| FCFP_6 | 1          | <br><chem>[*]O[*]</chem>    | -0.102 |
| FCFP_6 | 136597326  | <br><chem>[*]C([*])C</chem> | -0.081 |

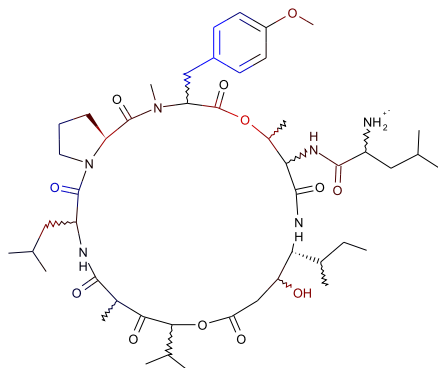
 $C_{49}H_{79}N_6O_{12}$ 

Molecular Weight: 944.18455

ALogP: 3.176

Rotatable Bonds: 13

Acceptors: 12

Donors: 5

## Model Prediction

Prediction: 0.001

Unit: g/kg\_body\_weight

Mahalanobis Distance: 49.772

Mahalanobis Distance p-value: 2.56e-057

Mahalanobis Distance: The Mahalanobis distance (MD) is a generalization of the Euclidean distance that accounts for correlations among the X properties. It is calculated as the distance to the center of the training data. The larger the MD, the less trustworthy the prediction.

Mahalanobis Distance p-value: The p-value gives the fraction of training data with an MD greater than or equal to the one for the given sample, assuming normally distributed data. The smaller the p-value, the less trustworthy the prediction. For highly non-normal X properties (e.g., fingerprints), the MD p-value is wildly inaccurate.

## Structural Similar Compounds

| Name                        | RESERPINE  | FOSINOPRIL | DIARYLANILIDE YELLOW |
|-----------------------------|------------|------------|----------------------|
| Structure                   |            |            |                      |
| Actual Endpoint (-log C)    | 6.38645    | 3.14896    | 2.70208              |
| Predicted Endpoint (-log C) | 5.548      | 3.92187    | 3.76154              |
| Distance                    | 1.462      | 1.499      | 1.518                |
| Reference                   | NTP 193 22 | NDA-19915  | NTP 30 C-4           |

## Model Applicability

Unknown features are fingerprint features in the query molecule, but not found in the training set.

1. Num\_Atoms out of range. Value: 67. Training min, max, mean, SD: 3, 60, 15.593, 8.2.
2. Unknown FCFP\_2 feature: 10: [\*][NH2+][\*]
3. Unknown FCFP\_2 feature: 18028531: [\*]C([\*])[NH2+]C
4. Unknown FCFP\_2 feature: -1817836174: [\*]CC([NH2+][\*])C(=[\*])[\*]
5. Unknown FCFP\_2 feature: 136418580: [\*][NH2+]C
6. Unknown ECFP\_6 feature: -154530762: [\*]N[\*]
7. Unknown ECFP\_6 feature: -591526139: [\*][NH2+][\*]
8. Unknown ECFP\_6 feature: -555098937: [\*]C([\*])OC(=[\*])[\*]
9. Unknown ECFP\_6 feature: 2024749573: [\*]C([\*])O
10. Unknown ECFP\_6 feature: 1307307440: [\*]:[c]:[\*])OC
11. Unknown ECFP\_6 feature: 1953224752: [\*][C@H]1[\*][\*]CN1C(=[\*])[\*]
12. Unknown ECFP\_6 feature: 1617733200: [\*]C([\*])N(C)C(=[\*])[\*]
13. Unknown ECFP\_6 feature: -1693599735: [\*]C([\*])NC(=[\*])[\*]
14. Unknown ECFP\_6 feature: -2091181441: [\*]C([\*])NC(=[\*])[\*]
15. Unknown ECFP\_6 feature: 1352327988: [\*]C([\*])[NH2+]C
16. Unknown ECFP\_6 feature: -484970154: [\*]N1[\*][\*]C[C@H]1C(=[\*])[\*]
17. Unknown ECFP\_6 feature: -1332781180: [\*]1[\*]CCC1
18. Unknown ECFP\_6 feature: -757679000: [\*]N1[\*][\*]CC1
19. Unknown ECFP\_6 feature: 1526862590: [\*]C([\*])C(=O)N([\*])[\*]
20. Unknown ECFP\_6 feature: -410102202: [\*]CC(N[\*])C(=[\*])[\*]
21. Unknown ECFP\_6 feature: -84540346: [\*]C([\*])CC([\*])[\*]

22. Unknown ECFP\_6 feature: -1224874527: [\*]CC(N([\*])([\*])C(=[\*])[\*])
23. Unknown ECFP\_6 feature: 1035165602: [\*]CC(C)C
24. Unknown ECFP\_6 feature: 1691770380: [\*]NC(C([\*])([\*])C([\*])[\*])
25. Unknown ECFP\_6 feature: 1038798692: [\*]CC(C)C([\*])([\*])
26. Unknown ECFP\_6 feature: -329826665: [\*]CC(O)C([\*])([\*])
27. Unknown ECFP\_6 feature: 771121623: [\*]C([\*])C[c](:[\*]):[\*]
28. Unknown ECFP\_6 feature: 866343404: [\*]N([\*])C
29. Unknown ECFP\_6 feature: -1567199489: [\*]NC(C([\*])([\*])C(=[\*])[\*])
30. Unknown ECFP\_6 feature: -1886208901: [\*]OC(=O)C([\*])([\*])
31. Unknown ECFP\_6 feature: -949992060: [\*]C([\*])CC
32. Unknown ECFP\_6 feature: -867777309: [\*]NC(=O)C([\*])([\*])
33. Unknown ECFP\_6 feature: 1535429263: [\*]OC(C)C([\*])([\*])
34. Unknown ECFP\_6 feature: -714938792: [\*]C(=[\*])C(C)C(=[\*])[\*]
35. Unknown ECFP\_6 feature: 53207596: [\*]C([\*])CC(=[\*])([\*])
36. Unknown ECFP\_6 feature: -855787384: [\*]OC(C([\*])([\*])C(=[\*])([\*]))
37. Unknown ECFP\_6 feature: -212107780: [\*]C([\*])C(=O)C([\*])([\*])
38. Unknown ECFP\_6 feature: -1167589895: [\*]C([\*])C(C)C
39. Unknown ECFP\_6 feature: -1887539559: [\*]CC(=O)O[\*]
40. Unknown ECFP\_6 feature: 865482986: [\*]C([\*])C
41. Unknown ECFP\_6 feature: 20550775: [\*]CC([NH2+])([\*])C(=[\*])([\*])
42. Unknown ECFP\_6 feature: -649348348: [\*]NC(=O)C([\*])([\*])
43. Unknown ECFP\_6 feature: -1312559847: [\*]C([\*])CC([\*])([\*])
44. Unknown ECFP\_6 feature: 866401773: [\*][NH2+]C

## Feature Contribution

### Top features for positive contribution

| Fingerprint | Bit/Smiles | Feature Structure                                                                                                    | Score |
|-------------|------------|----------------------------------------------------------------------------------------------------------------------|-------|
| ECFP_6      | -167460056 | 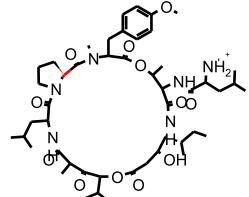<br><chem>[*]C([*])([*])</chem> | 0.136 |

|                                        |             |                                                                                                                                              |        |
|----------------------------------------|-------------|----------------------------------------------------------------------------------------------------------------------------------------------|--------|
| FCFP_6                                 | -1143715940 | 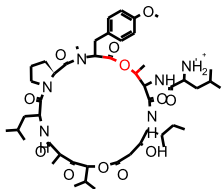<br><chem>[*]C([*])OC([*])[*]</chem>                      | 0.130  |
| ECFP_6                                 | 1559650422  | <br><chem>[*]C[*]</chem>                                  | 0.129  |
| Top Features for negative contribution |             |                                                                                                                                              |        |
| Fingerprint                            | Bit/Smiles  | Feature Structure                                                                                                                            | Score  |
| ECFP_6                                 | 2106656448  | <br><chem>[*]C(=O)[*]</chem>                              | -0.110 |
| FCFP_6                                 | 1           | <br><chem>[*]O[*]</chem>                                | -0.102 |
| FCFP_6                                 | -453677277  | <br><chem>[*]C[c]1:[cH]:[*]:[c]([*]):[cH]:[cH]:1</chem> | -0.091 |



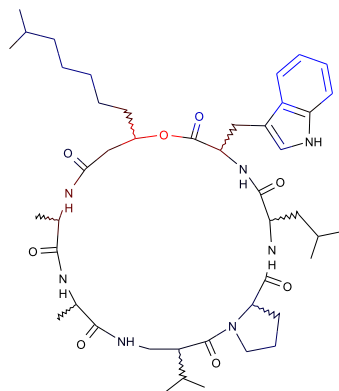

$C_{45}H_{69}N_7O_8$

Molecular Weight: 836.07145

ALogP: 4.986

Rotatable Bonds: 11

Acceptors: 8

Donors: 6

## Model Prediction

Prediction: 0.012

Unit: g/kg\_body\_weight

Mahalanobis Distance: 49.702

Mahalanobis Distance p-value: 3.22e-057

Mahalanobis Distance: The Mahalanobis distance (MD) is a generalization of the Euclidean distance that accounts for correlations among the X properties. It is calculated as the distance to the center of the training data. The larger the MD, the less trustworthy the prediction.

Mahalanobis Distance p-value: The p-value gives the fraction of training data with an MD greater than or equal to the one for the given sample, assuming normally distributed data. The smaller the p-value, the less trustworthy the prediction. For highly non-normal X properties (e.g., fingerprints), the MD p-value is wildly inaccurate.

## Structural Similar Compounds

| Name                        | DIARYLANILIDE YELLOW | RESERPINE  | GLYBURIDE |
|-----------------------------|----------------------|------------|-----------|
| Structure                   |                      |            |           |
| Actual Endpoint (-log C)    | 2.70208              | 6.38645    | 4.21661   |
| Predicted Endpoint (-log C) | 3.76154              | 5.548      | 4.21035   |
| Distance                    | 1.254                | 1.309      | 1.337     |
| Reference                   | NTP 30 C-4           | NTP 193 22 | UPJ-26452 |

## Model Applicability

Unknown features are fingerprint features in the query molecule, but not found in the training set.

1. All properties and OPS components are within expected ranges.
2. Unknown ECFP\_6 feature: -152683720: [\*]:[nH]:[\*]
3. Unknown ECFP\_6 feature: -154530762: [\*]N[\*]
4. Unknown ECFP\_6 feature: -1020449580: [\*][c]1:[\*]:[\*]:[nH]:[cH]:1
5. Unknown ECFP\_6 feature: -2024509555: [\*]C[c]1:[cH]:[\*]:[\*]:[c]:1:[\*]
6. Unknown ECFP\_6 feature: 1333660716: [\*][c]1:[\*]:[\*]:[c]:[\*]:[c]:1:[cH]:[\*]
7. Unknown ECFP\_6 feature: 1099224616: [\*]:[cH]:[c]1:[nH]:[\*]:[\*]:[c]:1:[\*]
8. Unknown ECFP\_6 feature: -953984246: [\*]:[c]1:[\*]:[\*]:[cH]:[nH]:1
9. Unknown ECFP\_6 feature: 1997021792: [\*]:[cH]:[cH]:[cH]:[\*]
10. Unknown ECFP\_6 feature: 771121623: [\*]C([\*])C([\*]):[\*]:[\*]
11. Unknown ECFP\_6 feature: -410102202: [\*]CC(N[\*])C(=[\*])[\*]
12. Unknown ECFP\_6 feature: -1886208901: [\*]OC(=O)C([\*])[\*]
13. Unknown ECFP\_6 feature: -555098937: [\*]C([\*])OC(=[\*])[\*]
14. Unknown ECFP\_6 feature: -554480104: [\*]CC(C[\*])O[\*]
15. Unknown ECFP\_6 feature: -1789838820: [\*]CCC([\*])[\*]
16. Unknown ECFP\_6 feature: -1790802833: [\*]CCC([\*])[\*]
17. Unknown ECFP\_6 feature: 1035165602: [\*]CC(C)C
18. Unknown ECFP\_6 feature: 53207596: [\*]C([\*])CC(=[\*])[\*]
19. Unknown ECFP\_6 feature: -742538367: [\*]CC(=O)N[\*]
20. Unknown ECFP\_6 feature: -1693599735: [\*]C([\*])NC(=[\*])[\*]
21. Unknown ECFP\_6 feature: 1863041499: [\*]NC(C)C(=[\*])[\*]



22. Unknown ECFP\_6 feature: 865482986: [\*]C([\*])C
23. Unknown ECFP\_6 feature: -867777309: [\*]NC(=O)C([\*])[\*]
24. Unknown ECFP\_6 feature: -1694930393: [\*]CNC(=[\*])[\*]
25. Unknown ECFP\_6 feature: -1457159889: [\*]NCC([\*])[\*]
26. Unknown ECFP\_6 feature: -2096927833: [\*]CC(C([\*])[\*])C(=[\*])[\*]
27. Unknown ECFP\_6 feature: -1167589895: [\*]C([\*])C(C)C
28. Unknown ECFP\_6 feature: 1526862590: [\*]C([\*])C(=O)N([\*])[\*]
29. Unknown ECFP\_6 feature: 1953224752: [\*][C@@H]1[\*][\*]CN1C(=[\*])[\*]
30. Unknown ECFP\_6 feature: -484970154: [\*]N1[\*][\*]C[C@H]1C(=[\*])[\*]
31. Unknown ECFP\_6 feature: -1332781180: [\*]1[\*]CCC1
32. Unknown ECFP\_6 feature: -757679000: [\*]N1[\*][\*]CC1
33. Unknown ECFP\_6 feature: -84540346: [\*]C([\*])CC([\*])[\*]

## Feature Contribution

### Top features for positive contribution

| Fingerprint | Bit/Smiles  | Feature Structure                                                                                           | Score |
|-------------|-------------|-------------------------------------------------------------------------------------------------------------|-------|
| ECFP_6      | -167460056  | 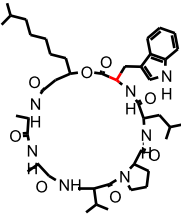<br>[*]C([*])[*]         | 0.136 |
| FCFP_6      | -1143715940 | <br>[*]C([*])OC([*])[*] | 0.130 |
| ECFP_6      | 1559650422  | <br>[*]C[*]            | 0.129 |

### Top Features for negative contribution

| Fingerprint | Bit/Smiles | Feature Structure                                                                                                                           | Score  |
|-------------|------------|---------------------------------------------------------------------------------------------------------------------------------------------|--------|
| FCFP_6      | 991735244  | 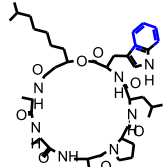<br><chem>[*]:[c]1:[*]:[cH]:[cH]:[cH]:[cH]:[cH]:1</chem> | -0.134 |
| ECFP_6      | 1564392544 | <br><chem>[*]:[c]1:[*]:[cH]:[cH]:[cH]:[cH]:1</chem>      | -0.133 |
| ECFP_6      | 2106656448 | <br><chem>[*]C(=O)[*]</chem>                             | -0.110 |

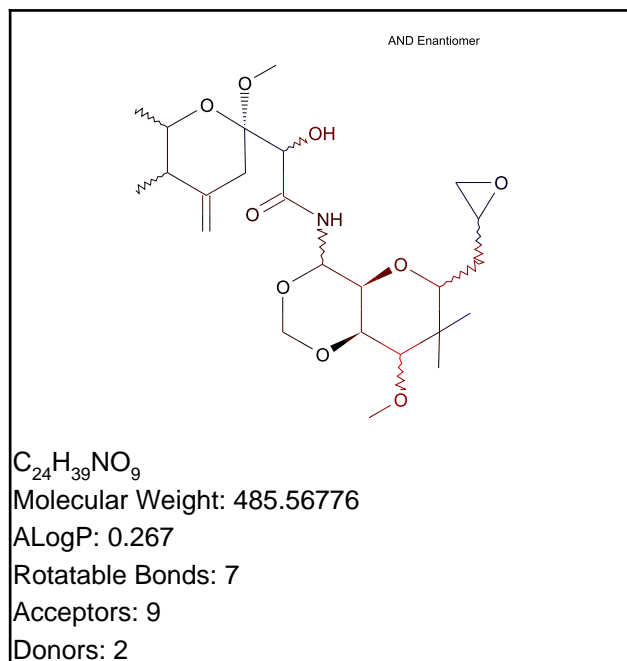

### Model Prediction

Prediction: 0.001

Unit: g/kg\_body\_weight

Mahalanobis Distance: 41.299

Mahalanobis Distance p-value: 2.69e-044

Mahalanobis Distance: The Mahalanobis distance (MD) is a generalization of the Euclidean distance that accounts for correlations among the X properties. It is calculated as the distance to the center of the training data. The larger the MD, the less trustworthy the prediction.

Mahalanobis Distance p-value: The p-value gives the fraction of training data with an MD greater than or equal to the one for the given sample, assuming normally distributed data. The smaller the p-value, the less trustworthy the prediction. For highly non-normal X properties (e.g., fingerprints), the MD p-value is wildly inaccurate.

### Structural Similar Compounds

| Name                        | LASIOCARPINE                                                                        | PENICILLIN VK                                                                       | PRAVASTATIN                                                                         |
|-----------------------------|-------------------------------------------------------------------------------------|-------------------------------------------------------------------------------------|-------------------------------------------------------------------------------------|
| Structure                   | 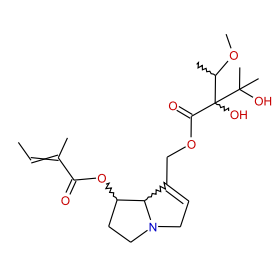 |  |  |
| Actual Endpoint (-log C)    | 6.0703                                                                              | 2.99188                                                                             | 3.62791                                                                             |
| Predicted Endpoint (-log C) | 5.55369                                                                             | 4.18433                                                                             | 4.37763                                                                             |
| Distance                    | 0.615                                                                               | 0.785                                                                               | 0.829                                                                               |
| Reference                   | NTP 39 34                                                                           | NTP REPORT # 336                                                                    | NDA-19898                                                                           |

### Model Applicability

Unknown features are fingerprint features in the query molecule, but not found in the training set.

1. All properties and OPS components are within expected ranges.
2. Unknown ECFP\_2 feature: 1327594201: [\*]CC(O[\*])(O[\*])C([\*])[\*]
3. Unknown ECFP\_6 feature: 1544874086: [\*]=C
4. Unknown ECFP\_6 feature: -1409796893: [\*]C([\*])OC([\*])[\*]
5. Unknown ECFP\_6 feature: -1939757055: [\*]C1[\*][\*]CO1
6. Unknown ECFP\_6 feature: -409209140: [\*]C([\*])OC
7. Unknown ECFP\_6 feature: -194719409: [\*]C([\*])OC([\*])([\*])[\*]
8. Unknown ECFP\_6 feature: 1667686968: [\*]C([\*])([\*])OC
9. Unknown ECFP\_6 feature: 2023785560: [\*]C([\*])O
10. Unknown ECFP\_6 feature: -2091181441: [\*]C([\*])NC(=[\*])[\*]
11. Unknown ECFP\_6 feature: 1067196438: [\*]C([\*])C(C)(C)C([\*])[\*]
12. Unknown ECFP\_6 feature: -2123665288: [\*]OC(C([\*])([\*])C([\*])([\*])[\*])
13. Unknown ECFP\_6 feature: -48623642: [\*]CC(O[\*])C([\*])([\*])[\*]
14. Unknown ECFP\_6 feature: -456441647: [\*]OC(C([\*])([\*])C([\*])([\*])[\*])
15. Unknown ECFP\_6 feature: -83576333: [\*]C([\*])CC1[\*][\*]1
16. Unknown ECFP\_6 feature: -457637478: [\*]NC(O[\*])C([\*])[\*]
17. Unknown ECFP\_6 feature: 859433814: [\*]C([\*])([\*])C
18. Unknown ECFP\_6 feature: -554480104: [\*]CC(C[\*])O[\*]
19. Unknown ECFP\_6 feature: -89681466: [\*]OCO[\*]
20. Unknown ECFP\_6 feature: 837844420: [\*]CC(O[\*])(O[\*])C([\*])[\*]
21. Unknown ECFP\_6 feature: 825070174: [\*]C(=[\*])C(O)C([\*])([\*])[\*]

22. Unknown ECFP\_6 feature: -90310073: [\*]C1CO1
23. Unknown ECFP\_6 feature: -649348348: [\*]NC(=O)C([\*])([\*])[\*]
24. Unknown ECFP\_6 feature: 407900312: [\*]C(=[\*])CC([\*])([\*])[\*]
25. Unknown ECFP\_6 feature: 1863511924: [\*]C([\*])C(C)C(=[\*])([\*])[\*]
26. Unknown ECFP\_6 feature: 1535429263: [\*]OC(C)C([\*])([\*])[\*]
27. Unknown ECFP\_6 feature: 1377749300: [\*]CC(=C)C([\*])([\*])[\*]
28. Unknown ECFP\_6 feature: 865482986: [\*]C([\*])C
29. Unknown ECFP\_6 feature: -2085781978: [\*]C(=C)[\*]

## Feature Contribution

| Top features for positive contribution |             |                                                                                                                  |       |
|----------------------------------------|-------------|------------------------------------------------------------------------------------------------------------------|-------|
| Fingerprint                            | Bit/Smiles  | Feature Structure                                                                                                | Score |
| ECFP_6                                 | -167460056  | 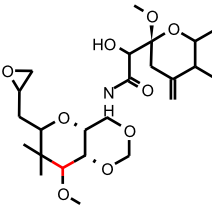<br>[*]C([*])([*])[*]         | 0.136 |
| FCFP_6                                 | -1143715940 | <br>[*]C([*])OC([*])([*])[*] | 0.130 |
| ECFP_6                                 | 1559650422  | <br>[*]C[*]                 | 0.129 |
| Top Features for negative contribution |             |                                                                                                                  |       |
| Fingerprint                            | Bit/Smiles  | Feature Structure                                                                                                | Score |
|                                        |             |                                                                                                                  |       |

|        |           |                                                                                                               |        |
|--------|-----------|---------------------------------------------------------------------------------------------------------------|--------|
| FCFP_6 | 1         | 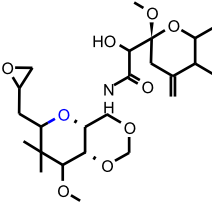 <p>[*]O[*]</p>            | -0.102 |
| FCFP_6 | 136597326 |  <p>[*]C([*])C</p>         | -0.081 |
| FCFP_6 | 566058135 |  <p>[*]NC(=O)C([*])[*]</p> | -0.056 |

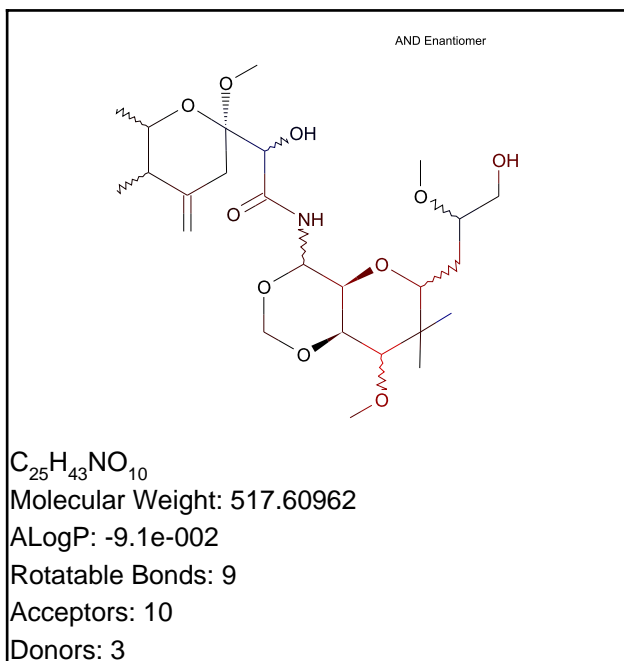

### Model Prediction

Prediction: 0.001

Unit: g/kg\_body\_weight

Mahalanobis Distance: 40.307

Mahalanobis Distance p-value: 1.13e-042

Mahalanobis Distance: The Mahalanobis distance (MD) is a generalization of the Euclidean distance that accounts for correlations among the X properties. It is calculated as the distance to the center of the training data. The larger the MD, the less trustworthy the prediction.

Mahalanobis Distance p-value: The p-value gives the fraction of training data with an MD greater than or equal to the one for the given sample, assuming normally distributed data. The smaller the p-value, the less trustworthy the prediction. For highly non-normal X properties (e.g., fingerprints), the MD p-value is wildly inaccurate.

### Structural Similar Compounds

| Name                        | LASIOCARPINE                                                                        | PRAVASTATIN                                                                         | PENICILLIN VK                                                                       |
|-----------------------------|-------------------------------------------------------------------------------------|-------------------------------------------------------------------------------------|-------------------------------------------------------------------------------------|
| Structure                   | 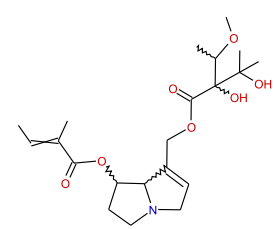 |  |  |
| Actual Endpoint (-log C)    | 6.0703                                                                              | 3.62791                                                                             | 2.99188                                                                             |
| Predicted Endpoint (-log C) | 5.55369                                                                             | 4.37763                                                                             | 4.18433                                                                             |
| Distance                    | 0.695                                                                               | 0.769                                                                               | 0.901                                                                               |
| Reference                   | NTP 39 34                                                                           | NDA-19898                                                                           | NTP REPORT # 336                                                                    |

### Model Applicability

Unknown features are fingerprint features in the query molecule, but not found in the training set.

- OPS PC13 out of range. Value: -5.9064. Training min, max, SD, explained variance: -5.6594, 6.6668, 2.119, 0.0196.
- Unknown ECFP\_2 feature: 1327594201: [\*]CC(O[\*])(O[\*])C([\*])[\*]
- Unknown ECFP\_6 feature: 1544874086: [\*]=C
- Unknown ECFP\_6 feature: -1409796893: [\*]C([\*])OC([\*])[\*]
- Unknown ECFP\_6 feature: -1939757055: [\*]C1[\*][\*]CO1
- Unknown ECFP\_6 feature: -409209140: [\*]C([\*])OC
- Unknown ECFP\_6 feature: -410173153: [\*]C([\*])OC
- Unknown ECFP\_6 feature: -194719409: [\*]C([\*])OC([\*])([\*])[\*]
- Unknown ECFP\_6 feature: 1667686968: [\*]C([\*])([\*])OC
- Unknown ECFP\_6 feature: 2022454958: [\*]CO
- Unknown ECFP\_6 feature: 2023785560: [\*]C([\*])O
- Unknown ECFP\_6 feature: -2091181441: [\*]C([\*])NC(=[\*])[\*]
- Unknown ECFP\_6 feature: 1067196438: [\*]C([\*])C(C)(C)C([\*])[\*]
- Unknown ECFP\_6 feature: -2123665288: [\*]OC(C([\*])([\*])C([\*])([\*])[\*])
- Unknown ECFP\_6 feature: -48623642: [\*]CC(O[\*])C([\*])([\*])[\*]
- Unknown ECFP\_6 feature: -456441647: [\*]OC(C([\*])([\*])C([\*])([\*])[\*])
- Unknown ECFP\_6 feature: -84540346: [\*]C([\*])CC([\*])[\*]
- Unknown ECFP\_6 feature: -457637478: [\*]NC(O[\*])C([\*])[\*]
- Unknown ECFP\_6 feature: 859433814: [\*]C([\*])([\*])C
- Unknown ECFP\_6 feature: 197414153: [\*]CC(C[\*])O[\*]

21. Unknown ECFP\_6 feature: -89681466: [\*]OCO[\*]
22. Unknown ECFP\_6 feature: -1909093651: [\*]C([\*])CO
23. Unknown ECFP\_6 feature: 837844420: [\*]CC(O[\*])(O[\*])C([\*])[\*]
24. Unknown ECFP\_6 feature: -649348348: [\*]NC(=O)C([\*])[\*]
25. Unknown ECFP\_6 feature: 825070174: [\*]C(=[\*])C(O)C([\*])([\*])[\*]
26. Unknown ECFP\_6 feature: 407900312: [\*]C(=[\*])CC([\*])([\*])[\*]
27. Unknown ECFP\_6 feature: 1863511924: [\*]C([\*])C(C)C(=[\*])[\*]
28. Unknown ECFP\_6 feature: 1535429263: [\*]OC(C)C([\*])[\*]
29. Unknown ECFP\_6 feature: 1377749300: [\*]CC(=C)C([\*])[\*]
30. Unknown ECFP\_6 feature: 865482986: [\*]C([\*])C
31. Unknown ECFP\_6 feature: -2085781978: [\*]C(=C)[\*]

## Feature Contribution

### Top features for positive contribution

| Fingerprint | Bit/Smiles  | Feature Structure                                                                                           | Score |
|-------------|-------------|-------------------------------------------------------------------------------------------------------------|-------|
| ECFP_6      | -167460056  | 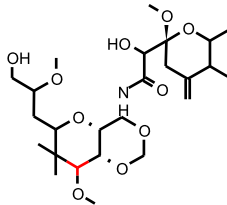<br>[*]C([*])[*]         | 0.136 |
| FCFP_6      | -1143715940 | <br>[*]C([*])OC([*])[*] | 0.130 |
| ECFP_6      | 1559650422  | <br>[*]C[*]            | 0.129 |

### Top Features for negative contribution

| Fingerprint | Bit/Smiles | Feature Structure | Score |
|-------------|------------|-------------------|-------|
|-------------|------------|-------------------|-------|

|        |           |                                                                                                               |        |
|--------|-----------|---------------------------------------------------------------------------------------------------------------|--------|
| FCFP_6 | 1         | 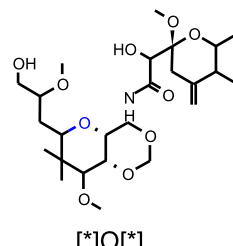 <p>[*]O[*]</p>             | -0.102 |
| FCFP_6 | 136597326 |  <p>[*]C([*])C</p>         | -0.081 |
| FCFP_6 | 566058135 |  <p>[*]NC(=O)C([*])[*]</p> | -0.056 |



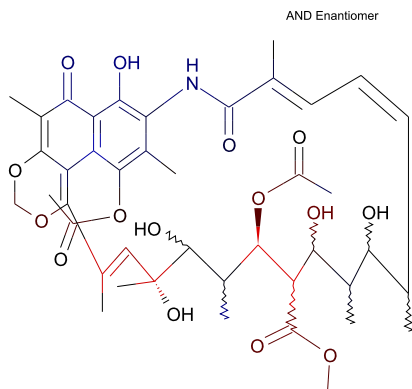

$C_{42}H_{53}NO_{15}$

Molecular Weight: 811.86791

ALogP: 2.745

Rotatable Bonds: 6

Acceptors: 15

Donors: 6

## Model Prediction

Prediction: 0.001

Unit: g/kg\_body\_weight

Mahalanobis Distance: 47.019

Mahalanobis Distance p-value: 2.98e-053

Mahalanobis Distance: The Mahalanobis distance (MD) is a generalization of the Euclidean distance that accounts for correlations among the X properties. It is calculated as the distance to the center of the training data. The larger the MD, the less trustworthy the prediction.

Mahalanobis Distance p-value: The p-value gives the fraction of training data with an MD greater than or equal to the one for the given sample, assuming normally distributed data. The smaller the p-value, the less trustworthy the prediction. For highly non-normal X properties (e.g., fingerprints), the MD p-value is wildly inaccurate.

## Structural Similar Compounds

| Name                        | CARMINE                           | OXYTETRACYCLINE .HCL | TETRACYCLINE .HCL |
|-----------------------------|-----------------------------------|----------------------|-------------------|
| Structure                   |                                   |                      |                   |
| Actual Endpoint (-log C)    | 3.5162                            | 2.56626              | 2.85193           |
| Predicted Endpoint (-log C) | 3.66829                           | 3.75581              | 3.94748           |
| Distance                    | 1.216                             | 1.251                | 1.288             |
| Reference                   | FOOD.CHEM.TOXICOL.2<br>5.897.1987 | NTP REPORT # 315     | NTP REPORT # 344  |

## Model Applicability

Unknown features are fingerprint features in the query molecule, but not found in the training set.

- OPS PC13 out of range. Value: -5.7077. Training min, max, SD, explained variance: -5.6594, 6.6668, 2.119, 0.0196.
- Unknown ECFP\_6 feature: -154530762: [\*]N[\*]
- Unknown ECFP\_6 feature: 456978524: [\*]C([\*])OC(=[\*])[\*]
- Unknown ECFP\_6 feature: 2024749573: [\*]C([\*])O
- Unknown ECFP\_6 feature: 2018700401: [\*]C([\*])([\*])O
- Unknown ECFP\_6 feature: -408473190: [\*]C(=[\*])OC
- Unknown ECFP\_6 feature: -556429595: [\*]COC(=[\*])[\*]
- Unknown ECFP\_6 feature: 1311676480: [\*]C(=[\*])O[c](:[\*]):[\*]
- Unknown ECFP\_6 feature: 2019062761: [\*]:[c](:[\*])O
- Unknown ECFP\_6 feature: -1699286547: [\*]C(=[\*])N[c](:[\*]):[\*]
- Unknown ECFP\_6 feature: 308335392: [\*]C([\*])C(C([\*])([\*])C(=[\*])[\*])
- Unknown ECFP\_6 feature: 2011659532: [\*]OC(C([\*])([\*])C([\*])[\*])
- Unknown ECFP\_6 feature: 824248976: [\*]C([\*])C(C)C([\*])[\*]
- Unknown ECFP\_6 feature: 305695353: [\*]C([\*])C(O)C([\*])[\*]
- Unknown ECFP\_6 feature: -521596699: [\*]C1[\*][\*]C([\*])([\*])C1O
- Unknown ECFP\_6 feature: -40769921: [\*]C([\*])[C@](C)(O)C=[\*]
- Unknown ECFP\_6 feature: 865482986: [\*]C([\*])C
- Unknown ECFP\_6 feature: 824611088: [\*]C([\*])C(C)C=[\*]
- Unknown ECFP\_6 feature: -1683911134: [\*]OC(=O)C([\*])[\*]

20. Unknown ECFP\_6 feature: 859433814: [\*]C([\*])([\*])C
21. Unknown ECFP\_6 feature: 464446479: [\*]C(=CC([\*])([\*])[\*])[\*]
22. Unknown ECFP\_6 feature: 890368401: [\*]C=C/C([\*])[\*]
23. Unknown ECFP\_6 feature: -3067141: [\*]C=C/C)\C(=[\*])[\*]
24. Unknown ECFP\_6 feature: -473922720: [\*]OC(=O)C
25. Unknown ECFP\_6 feature: 1796421070: [\*]OC(=C([\*])[\*])C(=[\*])[\*]
26. Unknown ECFP\_6 feature: 300955665: [\*]C=C/C=[\*]
27. Unknown ECFP\_6 feature: 1790105651: [\*]C(=C(C(=[\*])[\*])[c]([\*]):[\*])[\*]
28. Unknown ECFP\_6 feature: -813997308: [\*]C(=[\*])[c]([\*]):[c]([\*]):[\*]):[c]([\*]):[\*]
29. Unknown ECFP\_6 feature: 470857763: [\*]C(=CC=[\*])[\*]
30. Unknown ECFP\_6 feature: 1792159373: [\*]C(=C(C)C(=[\*])[\*])[\*]
31. Unknown ECFP\_6 feature: -89681466: [\*]OCO[\*]
32. Unknown ECFP\_6 feature: -1531301414: [\*]O[c]([\*]):[c]([\*]):[\*]):[c]([\*]):[\*]
33. Unknown ECFP\_6 feature: 1717462980: [\*]C(=[\*])C(=O)[c]([\*]):[\*]
34. Unknown ECFP\_6 feature: -1660913849: [\*][c]([\*]):[c](O):[c]([\*]):[\*]
35. Unknown ECFP\_6 feature: 1576255326: [\*][c]([\*]):[c](C):[c]([\*]):[\*]
36. Unknown ECFP\_6 feature: -1659480185: [\*]N[c]([\*]):[c]([\*]):[\*]):[c]([\*]):[\*]
37. Unknown ECFP\_6 feature: 1298725959: [\*]NC(=O)C(=[\*])[\*]

## Feature Contribution

### Top features for positive contribution

| Fingerprint | Bit/Smiles | Feature Structure                                                                                                      | Score |
|-------------|------------|------------------------------------------------------------------------------------------------------------------------|-------|
| FCFP_6      | 451847724  | 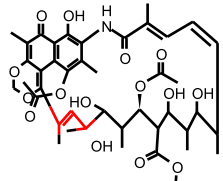<br><chem>[*]C=C\C(=[*])[*]</chem> | 0.160 |
| ECFP_6      | -167460056 | <br><chem>[*]C([*])[*]</chem>     | 0.136 |

|                                        |             |                                                                                                                         |        |
|----------------------------------------|-------------|-------------------------------------------------------------------------------------------------------------------------|--------|
| FCFP_6                                 | -1143715940 | 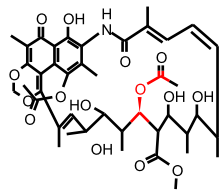<br><chem>[*]C([*])OC([*])[*]</chem> | 0.130  |
| Top Features for negative contribution |             |                                                                                                                         |        |
| Fingerprint                            | Bit/Smiles  | Feature Structure                                                                                                       | Score  |
| ECFP_6                                 | 2106656448  | <br><chem>[*]C(=O)[*]</chem>         | -0.110 |
| FCFP_6                                 | 1           | <br><chem>[*]O[*]</chem>             | -0.102 |
| FCFP_6                                 | 136597326   | <br><chem>[*]C([*])C</chem>        | -0.081 |

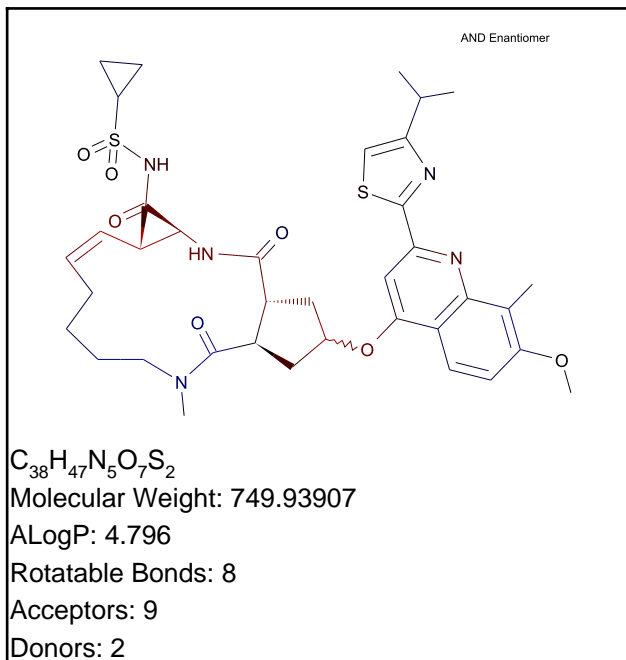

### Model Prediction

Prediction: 0.002

Unit: g/kg\_body\_weight

Mahalanobis Distance: 55.670

Mahalanobis Distance p-value: 1.58e-065

Mahalanobis Distance: The Mahalanobis distance (MD) is a generalization of the Euclidean distance that accounts for correlations among the X properties. It is calculated as the distance to the center of the training data. The larger the MD, the less trustworthy the prediction.

Mahalanobis Distance p-value: The p-value gives the fraction of training data with an MD greater than or equal to the one for the given sample, assuming normally distributed data. The smaller the p-value, the less trustworthy the prediction. For highly non-normal X properties (e.g., fingerprints), the MD p-value is wildly inaccurate.

### Structural Similar Compounds

| Name                        | RESERPINE                                                                           | DIARYLANILIDE YELLOW                                                                | C.I.PIGMENT RED 23                                                                  |
|-----------------------------|-------------------------------------------------------------------------------------|-------------------------------------------------------------------------------------|-------------------------------------------------------------------------------------|
| Structure                   | 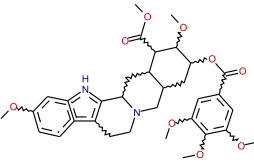 |  |  |
| Actual Endpoint (-log C)    | 6.38645                                                                             | 2.70208                                                                             | 2.28997                                                                             |
| Predicted Endpoint (-log C) | 5.548                                                                               | 3.76154                                                                             | 3.52921                                                                             |
| Distance                    | 0.885                                                                               | 0.887                                                                               | 0.922                                                                               |
| Reference                   | NTP 193 22                                                                          | NTP 30 C-4                                                                          | NTP 411 146                                                                         |

### Model Applicability

Unknown features are fingerprint features in the query molecule, but not found in the training set.

- OPS PC1 out of range. Value: 18.64. Training min, max, SD, explained variance: -9.2986, 15.594, 5, 0.1094.
- Unknown ECFP\_6 feature: 1018942292: [\*]NS(=O)(=O)C1[\*][\*]1
- Unknown ECFP\_6 feature: -154530762: [\*]N[\*]
- Unknown ECFP\_6 feature: 914325265: [\*]:s[\*]
- Unknown ECFP\_6 feature: -797085356: [\*]S(=O)(=O)[\*][\*]
- Unknown ECFP\_6 feature: -2095963820: [\*][C@@H]1[\*][\*]C[C@H]1C(=O)[\*][\*]
- Unknown ECFP\_6 feature: -867777309: [\*]NC(=O)C1[\*][\*]
- Unknown ECFP\_6 feature: -1338907019: [\*]C(=O)NC11[\*][\*][\*]1
- Unknown ECFP\_6 feature: -309676563: [\*]N[C@]1(C[C@H]1[\*])C(=O)[\*][\*]
- Unknown ECFP\_6 feature: 413587124: [\*]C1[\*]CC1[\*][\*]
- Unknown ECFP\_6 feature: -1049290660: [\*]C1[\*]C[C@H]1C=O
- Unknown ECFP\_6 feature: 890368401: [\*]C=C/C1[\*][\*]
- Unknown ECFP\_6 feature: 360408239: [\*]C/C=C/[\*]
- Unknown ECFP\_6 feature: -1331088410: [\*]CCC=O
- Unknown ECFP\_6 feature: -1332781180: [\*]1[\*]CCC1
- Unknown ECFP\_6 feature: -757679000: [\*]N1[\*][\*]CC1
- Unknown ECFP\_6 feature: 1616402542: [\*]CN(C)C(=O)[\*][\*]
- Unknown ECFP\_6 feature: 1526862590: [\*]C1[\*]C(=O)N1[\*][\*]
- Unknown ECFP\_6 feature: -801490360: [\*]C1[\*]CC1[\*][\*]
- Unknown ECFP\_6 feature: 1480368712: [\*]OC1C1[\*][\*]C1

21. Unknown ECFP\_6 feature: -1818486371: [\*]NC(=O)C1([\*])([\*])[\*]1
22. Unknown ECFP\_6 feature: 946167604: [\*]C(=[\*])NS(=[\*])(=[\*])[\*]
23. Unknown ECFP\_6 feature: 866343404: [\*]N([\*])C
24. Unknown ECFP\_6 feature: 1310940530: [\*]C([\*])O[c](:[\*]):[\*]
25. Unknown ECFP\_6 feature: -428002189: [\*]:[cH]:[c](:n:[\*])[c](:[\*]):[\*]
26. Unknown ECFP\_6 feature: 1333660716: [\*][c]1:[\*]:[\*]:[c](:[\*]):[c]:1:[cH]:[\*]
27. Unknown ECFP\_6 feature: 1576255326: [\*][c](:[\*]):[c](C):[c]([\*]):[\*]
28. Unknown ECFP\_6 feature: 1048320787: [\*][c](:[\*]):[c](:n:[\*]):[c](:[\*]):[\*]
29. Unknown ECFP\_6 feature: -1426923364: [\*][c]1:[\*]:[\*]:[cH]:s:1
30. Unknown ECFP\_6 feature: -253227249: [\*]:[c](:[\*])[c]1:n:[\*]:[\*]:s:1
31. Unknown ECFP\_6 feature: 1411720546: [\*]C([\*])[c]1:[cH]:[\*]:[\*]:n:1
32. Unknown ECFP\_6 feature: -224638920: [\*][c]1:[\*]:[\*]:s:[cH]:1
33. Unknown ECFP\_6 feature: 733491677: [\*]:[c](:[\*])C(C)C
34. Unknown ECFP\_6 feature: 1307307440: [\*]:[c](:[\*])OC
35. Unknown ECFP\_6 feature: 2121941848: [\*]NS(=O)(=O)C1[\*][\*]1
36. Unknown ECFP\_6 feature: 2102150379: [\*]S(=[\*])(=O)[\*]
37. Unknown ECFP\_6 feature: -622223421: [\*]S(=[\*])(=[\*])C1CC1

## Feature Contribution

### Top features for positive contribution

| Fingerprint | Bit/Smiles | Feature Structure                                                                                                     | Score |
|-------------|------------|-----------------------------------------------------------------------------------------------------------------------|-------|
| FCFP_6      | 451847724  | 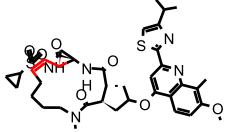<br><chem>[*]C=C\C(=[*])[*]</chem> | 0.160 |
| ECFP_6      | -167460056 | <br><chem>[*]C([*])[*]</chem>    | 0.136 |

|                                        |            |                                                                                                     |        |
|----------------------------------------|------------|-----------------------------------------------------------------------------------------------------|--------|
| FCFP_6                                 | 3          | 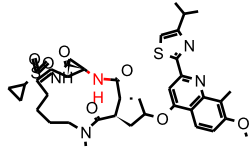<br>[*]O         | 0.092  |
| Top Features for negative contribution |            |                                                                                                     |        |
| Fingerprint                            | Bit/Smiles | Feature Structure                                                                                   | Score  |
| ECFP_6                                 | 2106656448 | <br>[*]C(=O)[*]  | -0.110 |
| FCFP_6                                 | 1          | <br>[*]O[*]      | -0.102 |
| FCFP_6                                 | 136597326  | <br>[*]C([*])C | -0.081 |

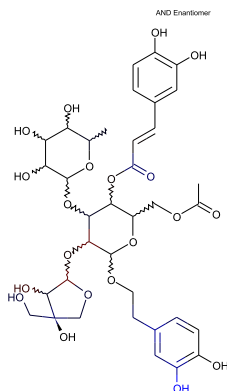
 $C_{36}H_{46}O_{20}$ 

Molecular Weight: 798.73843

ALogP: -0.546

Rotatable Bonds: 16

Acceptors: 20

Donors: 10

## Model Prediction

Prediction: 2.382

Unit: g/kg\_body\_weight

Mahalanobis Distance: 14.541

Mahalanobis Distance p-value: 1.01e-013

Mahalanobis Distance: The Mahalanobis distance (MD) is a generalization of the Euclidean distance that accounts for correlations among the X properties. It is calculated as the distance to the center of the training data. The larger the MD, the less trustworthy the prediction.

Mahalanobis Distance p-value: The p-value gives the fraction of training data with an MD greater than or equal to the one for the given sample, assuming normally distributed data. The smaller the p-value, the less trustworthy the prediction. For highly non-normal X properties (e.g., fingerprints), the MD p-value is wildly inaccurate.

## Structural Similar Compounds

| Name                        | OXYTETRACYCLINE | ERYTHROMYCIN   | 4,4'-DIAMINO-2,2'-STILBENEDISULFONIC ACID.2NaSALT |
|-----------------------------|-----------------|----------------|---------------------------------------------------|
| Structure                   |                 |                |                                                   |
| Actual Endpoint (-log C)    | 2.36214         | 3.29629        | 2.50759                                           |
| Predicted Endpoint (-log C) | 2.77834         | 4.83895        | 3.26068                                           |
| Distance                    | 1.763           | 1.855          | 2.106                                             |
| Reference                   | NCI/NTP TR-315  | NCI/NTP TR-338 | NCI/NTP TR-412                                    |

## Model Applicability

Unknown features are fingerprint features in the query molecule, but not found in the training set.

1. Molecular\_Weight out of range. Value: 798.74. Training min, max, mean, SD: 74.122, 731.95, 245.25, 106.4.
2. Num\_H\_Donors out of range. Value: 10. Training min, max, mean, SD: 0, 7, 1.2135, 1.216.
3. Num\_H\_Acceptors out of range. Value: 20. Training min, max, mean, SD: 0, 13, 3.2809, 2.199.
4. Molecular\_PolarSurfaceArea out of range. Value: 310.28. Training min, max, mean, SD: 0, 201.84, 63.052, 40.7.
5. Molecular\_PolarSASA out of range. Value: 473.59. Training min, max, mean, SD: 0, 357.83, 109.38, 65.5.
6. OPS PC2 out of range. Value: 9.7706. Training min, max, SD, explained variance: -5.6103, 7.6016, 2.34, 0.1237.
7. OPS PC7 out of range. Value: 4.5303. Training min, max, SD, explained variance: -4.36, 3.9384, 1.418, 0.0454.
8. OPS PC13 out of range. Value: 3.5474. Training min, max, SD, explained variance: -2.9619, 2.8704, 1.049, 0.0249.
9. OPS PC14 out of range. Value: -2.3308. Training min, max, SD, explained variance: -2.0656, 3.3808, 1.011, 0.0231.

## Feature Contribution

Top features for positive contribution

| Fingerprint                            | Bit/Smiles  | Feature Structure                                                                                                                    | Score  |
|----------------------------------------|-------------|--------------------------------------------------------------------------------------------------------------------------------------|--------|
| FCFP_2                                 | -1143715940 | <p>AND Enantiomer</p> 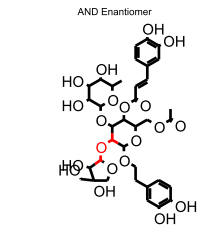 <p>[*]C([*])OC([*])[*]</p> | 0.095  |
| FCFP_2                                 | 3           | <p>AND Enantiomer</p>  <p>[*]O</p>                | 0.074  |
| FCFP_2                                 | 565998553   | <p>AND Enantiomer</p>  <p>[*]OC(=O)C=[*]</p>      | 0.008  |
| Top Features for negative contribution |             |                                                                                                                                      |        |
| Fingerprint                            | Bit/Smiles  | Feature Structure                                                                                                                    | Score  |
| FCFP_2                                 | 7           | <p>AND Enantiomer</p>  <p>[*]O</p>              | -0.214 |
|                                        |             |                                                                                                                                      |        |



|        |            |                                                                                                                                 |        |
|--------|------------|---------------------------------------------------------------------------------------------------------------------------------|--------|
| FCFP_2 | -549108873 | <p>AND Enantiomer</p> 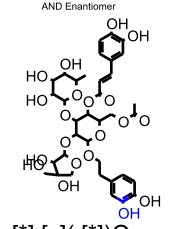 <p>[*]:[c](:[*])O</p> | -0.127 |
| FCFP_2 | 1872154524 | <p>AND Enantiomer</p>  <p>[*]C(=O)[*]</p>    | -0.105 |

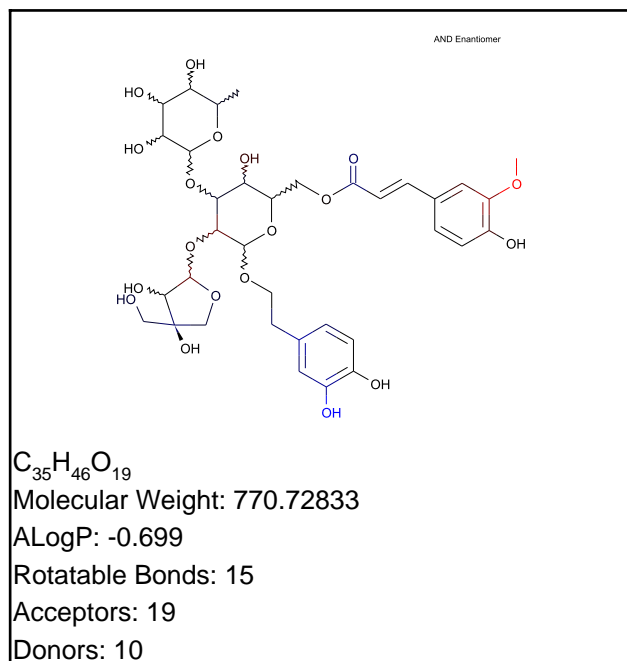

### Model Prediction

Prediction: 1.277

Unit: g/kg\_body\_weight

Mahalanobis Distance: 14.182

Mahalanobis Distance p-value: 5.56e-013

Mahalanobis Distance: The Mahalanobis distance (MD) is a generalization of the Euclidean distance that accounts for correlations among the X properties. It is calculated as the distance to the center of the training data. The larger the MD, the less trustworthy the prediction.

Mahalanobis Distance p-value: The p-value gives the fraction of training data with an MD greater than or equal to the one for the given sample, assuming normally distributed data. The smaller the p-value, the less trustworthy the prediction. For highly non-normal X properties (e.g., fingerprints), the MD p-value is wildly inaccurate.

### Structural Similar Compounds

| Name                        | OXYTETRACYCLINE                                                                     | ERYTHROMYCIN                                                                        | 4,4'-DIAMINO-2,2'-STILBENEDISULFONIC ACID.2NaSALT                                   |
|-----------------------------|-------------------------------------------------------------------------------------|-------------------------------------------------------------------------------------|-------------------------------------------------------------------------------------|
| Structure                   | 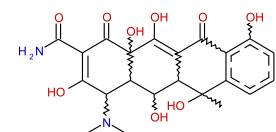 |  |  |
| Actual Endpoint (-log C)    | 2.36214                                                                             | 3.29629                                                                             | 2.50759                                                                             |
| Predicted Endpoint (-log C) | 2.77834                                                                             | 4.83895                                                                             | 3.26068                                                                             |
| Distance                    | 1.648                                                                               | 1.749                                                                               | 2.004                                                                               |
| Reference                   | NCI/NTP TR-315                                                                      | NCI/NTP TR-338                                                                      | NCI/NTP TR-412                                                                      |

### Model Applicability

Unknown features are fingerprint features in the query molecule, but not found in the training set.

1. Molecular\_Weight out of range. Value: 770.73. Training min, max, mean, SD: 74.122, 731.95, 245.25, 106.4.
2. Num\_H\_Donors out of range. Value: 10. Training min, max, mean, SD: 0, 7, 1.2135, 1.216.
3. Num\_H\_Acceptors out of range. Value: 19. Training min, max, mean, SD: 0, 13, 3.2809, 2.199.
4. Molecular\_PolarSurfaceArea out of range. Value: 293.2. Training min, max, mean, SD: 0, 201.84, 63.052, 40.7.
5. Molecular\_PolarSASA out of range. Value: 446.75. Training min, max, mean, SD: 0, 357.83, 109.38, 65.5.
6. OPS PC1 out of range. Value: 7.3866. Training min, max, SD, explained variance: -4.595, 7.2949, 2.487, 0.1398.
7. OPS PC2 out of range. Value: 9.5275. Training min, max, SD, explained variance: -5.6103, 7.6016, 2.34, 0.1237.
8. OPS PC7 out of range. Value: 4.5197. Training min, max, SD, explained variance: -4.36, 3.9384, 1.418, 0.0454.
9. OPS PC11 out of range. Value: 3.8793. Training min, max, SD, explained variance: -3.8346, 3.8752, 1.233, 0.0343.
10. OPS PC13 out of range. Value: 3.8687. Training min, max, SD, explained variance: -2.9619, 2.8704, 1.049, 0.0249.

### Feature Contribution

| Top features for positive contribution |             |                                                                                                            |        |
|----------------------------------------|-------------|------------------------------------------------------------------------------------------------------------|--------|
| Fingerprint                            | Bit/Smiles  | Feature Structure                                                                                          | Score  |
| FCFP_2                                 | 136627117   | 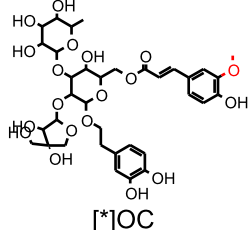<br>[*]OC               | 0.173  |
| FCFP_2                                 | -1143715940 | <br>[*]C([*])OC([*])[*] | 0.095  |
| FCFP_2                                 | 1036089772  | <br>[*]:[c](:[*])OC     | 0.075  |
| Top Features for negative contribution |             |                                                                                                            |        |
| Fingerprint                            | Bit/Smiles  | Feature Structure                                                                                          | Score  |
| FCFP_2                                 | 7           | <br>[*]O              | -0.214 |
|                                        |             |                                                                                                            |        |

|        |            |                                                                                                                    |        |
|--------|------------|--------------------------------------------------------------------------------------------------------------------|--------|
| FCFP_2 | -549108873 | 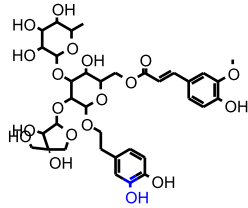<br><chem>[*]:[c](:[*])O</chem> | -0.127 |
| FCFP_2 | 1872154524 | <br><chem>[*]C(=O)[*]</chem>    | -0.105 |

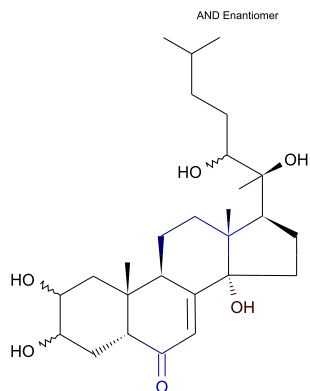

$C_{27}H_{44}O_6$

Molecular Weight: 464.63466

ALogP: 2.489

Rotatable Bonds: 5

Acceptors: 6

Donors: 5

## Model Prediction

Prediction: 0.137

Unit: g/kg\_body\_weight

Mahalanobis Distance: 9.007

Mahalanobis Distance p-value: 0.00138

Mahalanobis Distance: The Mahalanobis distance (MD) is a generalization of the Euclidean distance that accounts for correlations among the X properties. It is calculated as the distance to the center of the training data. The larger the MD, the less trustworthy the prediction.

Mahalanobis Distance p-value: The p-value gives the fraction of training data with an MD greater than or equal to the one for the given sample, assuming normally distributed data. The smaller the p-value, the less trustworthy the prediction. For highly non-normal X properties (e.g., fingerprints), the MD p-value is wildly inaccurate.

## Structural Similar Compounds

| Name                        | LASIOCARPINE   | ACETOHEXAMIDE  | HYDROCHLOROTHIAZIDE |
|-----------------------------|----------------|----------------|---------------------|
| Structure                   |                |                |                     |
| Actual Endpoint (-log C)    | 5.48403        | 2.55683        | 3.56001             |
| Predicted Endpoint (-log C) | 3.82301        | 3.62413        | 3.55045             |
| Distance                    | 0.872          | 0.922          | 0.974               |
| Reference                   | NCI/NTP TR-039 | NCI/NTP TR-050 | NCI/NTP TR-357      |

## Model Applicability

Unknown features are fingerprint features in the query molecule, but not found in the training set.

1. All properties and OPS components are within expected ranges.

## Feature Contribution

### Top features for positive contribution

| Fingerprint | Bit/Smiles | Feature Structure | Score |
|-------------|------------|-------------------|-------|
| FCFP_2      | 3          |                   | 0.074 |

### Top Features for negative contribution

| Fingerprint | Bit/Smiles | Feature Structure | Score |
|-------------|------------|-------------------|-------|
|-------------|------------|-------------------|-------|

|        |             |                                                                                                                         |        |
|--------|-------------|-------------------------------------------------------------------------------------------------------------------------|--------|
| FCFP_2 | -1272798659 | 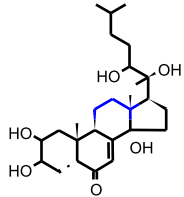<br><chem>[*]CCC([*])([*])[*]</chem> | -0.111 |
| FCFP_2 | 1872154524  | <br><chem>[*]C(=O)[*]</chem>         | -0.105 |
| FCFP_2 | 1           | <br><chem>[*]O[*]</chem>             | -0.080 |

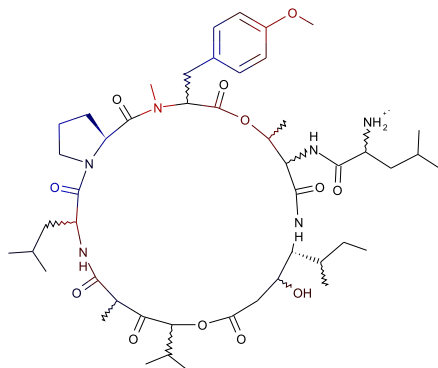
 $C_{49}H_{79}N_6O_{12}$ 

Molecular Weight: 944.18455

ALogP: 3.176

Rotatable Bonds: 13

Acceptors: 12

Donors: 5

## Model Prediction

Prediction: 0.002

Unit: g/kg\_body\_weight

Mahalanobis Distance: 15.135

Mahalanobis Distance p-value: 5.92e-015

Mahalanobis Distance: The Mahalanobis distance (MD) is a generalization of the Euclidean distance that accounts for correlations among the X properties. It is calculated as the distance to the center of the training data. The larger the MD, the less trustworthy the prediction.

Mahalanobis Distance p-value: The p-value gives the fraction of training data with an MD greater than or equal to the one for the given sample, assuming normally distributed data. The smaller the p-value, the less trustworthy the prediction. For highly non-normal X properties (e.g., fingerprints), the MD p-value is wildly inaccurate.

## Structural Similar Compounds

| Name                        | ERYTHROMYCIN   | RESERPINE      | OXYTETRACYCLINE |
|-----------------------------|----------------|----------------|-----------------|
| Structure                   |                |                |                 |
| Actual Endpoint (-log C)    | 3.29629        | 6.13118        | 2.36214         |
| Predicted Endpoint (-log C) | 4.83895        | 4.38304        | 2.77834         |
| Distance                    | 0.971          | 1.511          | 1.517           |
| Reference                   | NCI/NTP TR-338 | NCI/NTP TR-193 | NCI/NTP TR-315  |

## Model Applicability

Unknown features are fingerprint features in the query molecule, but not found in the training set.

1. Molecular\_Weight out of range. Value: 944.18. Training min, max, mean, SD: 74.122, 731.95, 245.25, 106.4.
2. Molecular\_PolarSurfaceArea out of range. Value: 243.65. Training min, max, mean, SD: 0, 201.84, 63.052, 40.7.
3. OPS PC1 out of range. Value: 8.4984. Training min, max, SD, explained variance: -4.595, 7.2949, 2.487, 0.1398.
4. OPS PC9 out of range. Value: 5.4631. Training min, max, SD, explained variance: -2.8548, 3.3954, 1.263, 0.0360.
5. Unknown FCFP\_2 feature: 10: [\*][NH2+][\*]
6. Unknown FCFP\_2 feature: 18028531: [\*]C([\*])[NH2+]C
7. Unknown FCFP\_2 feature: -1817836174: [\*]CC([NH2+][\*])C(=[\*])[\*]
8. Unknown FCFP\_2 feature: 136418580: [\*][NH2+]C

## Feature Contribution

### Top features for positive contribution

| Fingerprint | Bit/Smiles | Feature Structure | Score |
|-------------|------------|-------------------|-------|
|             |            |                   |       |

|                                        |             |                                                                                                              |        |
|----------------------------------------|-------------|--------------------------------------------------------------------------------------------------------------|--------|
| FCFP_2                                 | 136627117   | 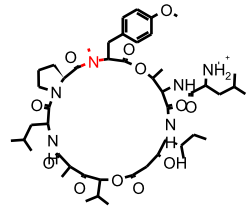<br>[*]OC                 | 0.173  |
| FCFP_2                                 | -885550502  | <br>[*]C([*])NC(=[*])[*]  | 0.115  |
| FCFP_2                                 | -1143715940 | <br>[*]C([*])OC([*])[*]   | 0.095  |
| Top Features for negative contribution |             |                                                                                                              |        |
| Fingerprint                            | Bit/Smiles  | Feature Structure                                                                                            | Score  |
| FCFP_2                                 | -1272798659 | <br>[*]CCC([*])([*])[*] | -0.111 |
| FCFP_2                                 | 1872154524  | <br>[*]C(=O)[*]         | -0.105 |



FCFP\_2

203677720

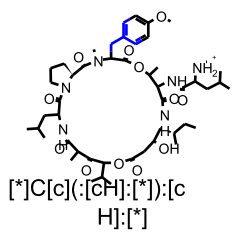

-0.083

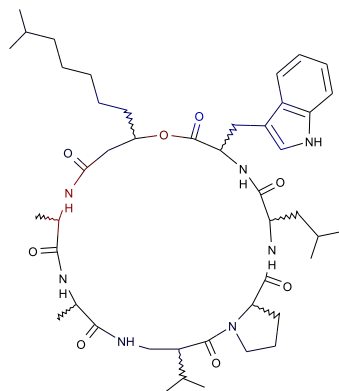

$C_{45}H_{69}N_7O_8$

Molecular Weight: 836.07145

ALogP: 4.986

Rotatable Bonds: 11

Acceptors: 8

Donors: 6

## Model Prediction

Prediction: 0.021

Unit: g/kg\_body\_weight

Mahalanobis Distance: 15.238

Mahalanobis Distance p-value: 3.62e-015

Mahalanobis Distance: The Mahalanobis distance (MD) is a generalization of the Euclidean distance that accounts for correlations among the X properties. It is calculated as the distance to the center of the training data. The larger the MD, the less trustworthy the prediction.

Mahalanobis Distance p-value: The p-value gives the fraction of training data with an MD greater than or equal to the one for the given sample, assuming normally distributed data. The smaller the p-value, the less trustworthy the prediction. For highly non-normal X properties (e.g., fingerprints), the MD p-value is wildly inaccurate.

## Structural Similar Compounds

| Name                        | ERYTHROMYCIN   | RESERPINE      | C.I.PIGMENT RED 23 |
|-----------------------------|----------------|----------------|--------------------|
| Structure                   |                |                |                    |
| Actual Endpoint (-log C)    | 3.29629        | 6.13118        | 2.30052            |
| Predicted Endpoint (-log C) | 4.83895        | 4.38304        | 3.55333            |
| Distance                    | 1.109          | 1.326          | 1.359              |
| Reference                   | NCI/NTP TR-338 | NCI/NTP TR-193 | NCI/NTP TR-411     |

## Model Applicability

Unknown features are fingerprint features in the query molecule, but not found in the training set.

1. Molecular\_Weight out of range. Value: 836.07. Training min, max, mean, SD: 74.122, 731.95, 245.25, 106.4.
2. Molecular\_PolarSurfaceArea out of range. Value: 207.89. Training min, max, mean, SD: 0, 201.84, 63.052, 40.7.
3. OPS\_PC8 out of range. Value: 4.75. Training min, max, SD, explained variance: -3.8548, 3.9137, 1.331, 0.0400.
4. OPS\_PC12 out of range. Value: -3.71. Training min, max, SD, explained variance: -2.364, 2.9228, 1.079, 0.0263.

## Feature Contribution

| Top features for positive contribution |            |                          |       |
|----------------------------------------|------------|--------------------------|-------|
| Fingerprint                            | Bit/Smiles | Feature Structure        | Score |
| FCFP_2                                 | -885550502 | <br>[*]C([*])NC(=[*])[*] | 0.115 |

|                                        |             |                                                                                                                                   |        |
|----------------------------------------|-------------|-----------------------------------------------------------------------------------------------------------------------------------|--------|
| FCFP_2                                 | -1143715940 | 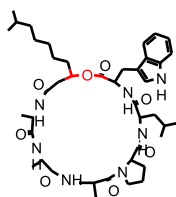<br><chem>[*]C([*])OC([*])[*]</chem>           | 0.095  |
| FCFP_2                                 | 3           | <br><chem>[*]O</chem>                          | 0.074  |
| Top Features for negative contribution |             |                                                                                                                                   |        |
| Fingerprint                            | Bit/Smiles  | Feature Structure                                                                                                                 | Score  |
| FCFP_2                                 | -1272798659 | <br><chem>[*]CCC([*])([*])[*]</chem>           | -0.111 |
| FCFP_2                                 | 1872154524  | <br><chem>[*]C(=O)[*]</chem>                  | -0.105 |
| FCFP_2                                 | 203677720   | <br><chem>[*]C[c](:[cH]:[*]):[cH]:[*]</chem> | -0.083 |



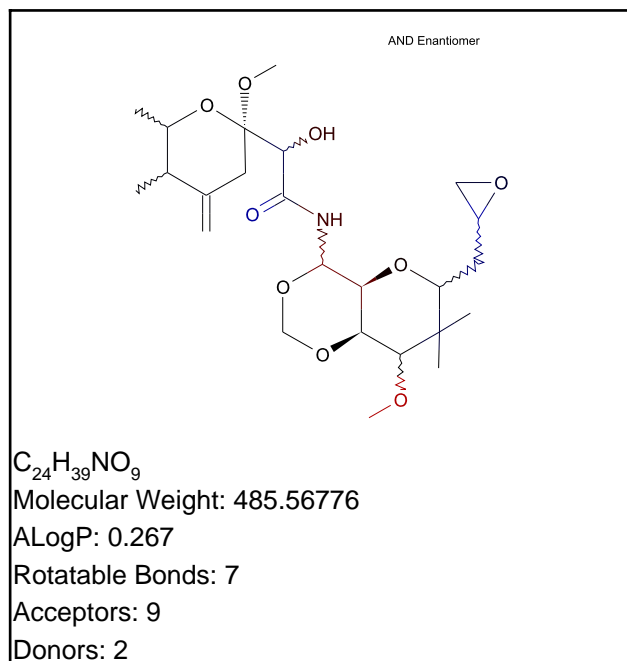

### Model Prediction

Prediction: 0.018

Unit: g/kg\_body\_weight

Mahalanobis Distance: 9.765

Mahalanobis Distance p-value: 0.000105

Mahalanobis Distance: The Mahalanobis distance (MD) is a generalization of the Euclidean distance that accounts for correlations among the X properties. It is calculated as the distance to the center of the training data. The larger the MD, the less trustworthy the prediction.

Mahalanobis Distance p-value: The p-value gives the fraction of training data with an MD greater than or equal to the one for the given sample, assuming normally distributed data. The smaller the p-value, the less trustworthy the prediction. For highly non-normal X properties (e.g., fingerprints), the MD p-value is wildly inaccurate.

### Structural Similar Compounds

| Name                        | LASIOCARPINE                                                                        | MALAOXON                                                                            | MATATHION                                                                           |
|-----------------------------|-------------------------------------------------------------------------------------|-------------------------------------------------------------------------------------|-------------------------------------------------------------------------------------|
| Structure                   | 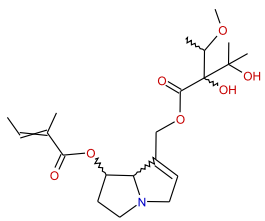 |  |  |
| Actual Endpoint (-log C)    | 5.48403                                                                             | 3.84411                                                                             | 3.2637                                                                              |
| Predicted Endpoint (-log C) | 3.82301                                                                             | 3.97262                                                                             | 4.04535                                                                             |
| Distance                    | 0.539                                                                               | 0.781                                                                               | 0.806                                                                               |
| Reference                   | NCI/NTP TR-039                                                                      | NCI/NTP TR-135                                                                      | NCI/NTP TR-192                                                                      |

### Model Applicability

Unknown features are fingerprint features in the query molecule, but not found in the training set.

1. All properties and OPS components are within expected ranges.
2. Unknown FCFP\_2 feature: 1327594201: [\*]CC(O[\*])(O[\*])C([\*])[\*]

### Feature Contribution

#### Top features for positive contribution

| Fingerprint | Bit/Smiles | Feature Structure                                                                                           | Score |
|-------------|------------|-------------------------------------------------------------------------------------------------------------|-------|
| FCFP_2      | 136627117  | 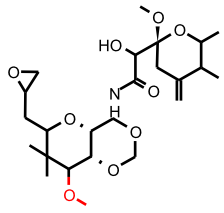<br><chem>[*]OC</chem> | 0.173 |

|                                        |             |                                                                                                                          |        |
|----------------------------------------|-------------|--------------------------------------------------------------------------------------------------------------------------|--------|
| FCFP_2                                 | -885550502  | 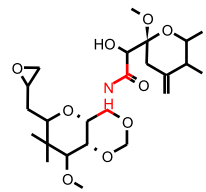<br><chem>[*]C([*])NC(=[*])[*]</chem> | 0.115  |
| FCFP_2                                 | -1143715940 | <br><chem>[*]C([*])OC([*])[*]</chem>  | 0.095  |
| Top Features for negative contribution |             |                                                                                                                          |        |
| Fingerprint                            | Bit/Smiles  | Feature Structure                                                                                                        | Score  |
| FCFP_2                                 | -1272798659 | <br><chem>[*]CCC([*])([*])[*]</chem>  | -0.111 |
| FCFP_2                                 | 1872154524  | <br><chem>[*]C(=O)[*]</chem>        | -0.105 |
| FCFP_2                                 | 1           | <br><chem>[*]O[*]</chem>            | -0.080 |



AND Enantiomer

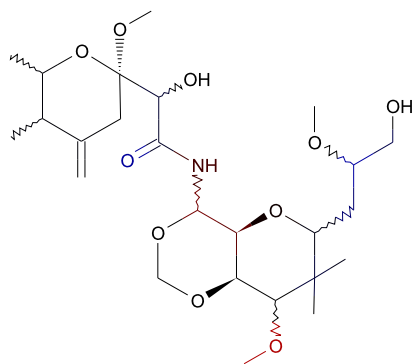 $C_{25}H_{43}NO_{10}$ 

Molecular Weight: 517.60962

ALogP: -9.1e-002

Rotatable Bonds: 9

Acceptors: 10

Donors: 3

## Model Prediction

Prediction: 0.029

Unit: g/kg\_body\_weight

Mahalanobis Distance: 11.234

Mahalanobis Distance p-value: 3.34e-007

Mahalanobis Distance: The Mahalanobis distance (MD) is a generalization of the Euclidean distance that accounts for correlations among the X properties. It is calculated as the distance to the center of the training data. The larger the MD, the less trustworthy the prediction.

Mahalanobis Distance p-value: The p-value gives the fraction of training data with an MD greater than or equal to the one for the given sample, assuming normally distributed data. The smaller the p-value, the less trustworthy the prediction. For highly non-normal X properties (e.g., fingerprints), the MD p-value is wildly inaccurate.

## Structural Similar Compounds

| Name                        | LASIOCARPINE   | ERYTHROMYCIN   | MATATHION      |
|-----------------------------|----------------|----------------|----------------|
| Structure                   |                |                |                |
| Actual Endpoint (-log C)    | 5.48403        | 3.29629        | 3.2637         |
| Predicted Endpoint (-log C) | 3.82301        | 4.83895        | 4.04535        |
| Distance                    | 0.652          | 0.887          | 0.931          |
| Reference                   | NCI/NTP TR-039 | NCI/NTP TR-338 | NCI/NTP TR-192 |

## Model Applicability

Unknown features are fingerprint features in the query molecule, but not found in the training set.

- OPS PC9 out of range. Value: 3.5219. Training min, max, SD, explained variance: -2.8548, 3.3954, 1.263, 0.0360.
- Unknown FCFP\_2 feature: 1327594201: [\*]CC(O[\*])(O[\*])C([\*])[\*]

## Feature Contribution

### Top features for positive contribution

| Fingerprint | Bit/Smiles | Feature Structure | Score |
|-------------|------------|-------------------|-------|
| FCFP_2      | 136627117  | <br>[*]OC         | 0.173 |



|                                        |             |                                                                                                                          |        |
|----------------------------------------|-------------|--------------------------------------------------------------------------------------------------------------------------|--------|
| FCFP_2                                 | -885550502  | 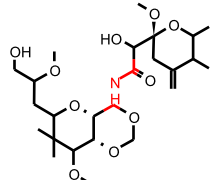<br><chem>[*]C([*])NC(=[*])[*]</chem> | 0.115  |
| FCFP_2                                 | -1143715940 | <br><chem>[*]C([*])OC([*])[*]</chem>  | 0.095  |
| Top Features for negative contribution |             |                                                                                                                          |        |
| Fingerprint                            | Bit/Smiles  | Feature Structure                                                                                                        | Score  |
| FCFP_2                                 | -1272798659 | <br><chem>[*]CCC([*])([*])[*]</chem>  | -0.111 |
| FCFP_2                                 | 1872154524  | <br><chem>[*]C(=O)[*]</chem>        | -0.105 |
| FCFP_2                                 | 1           | <br><chem>[*]O[*]</chem>            | -0.080 |



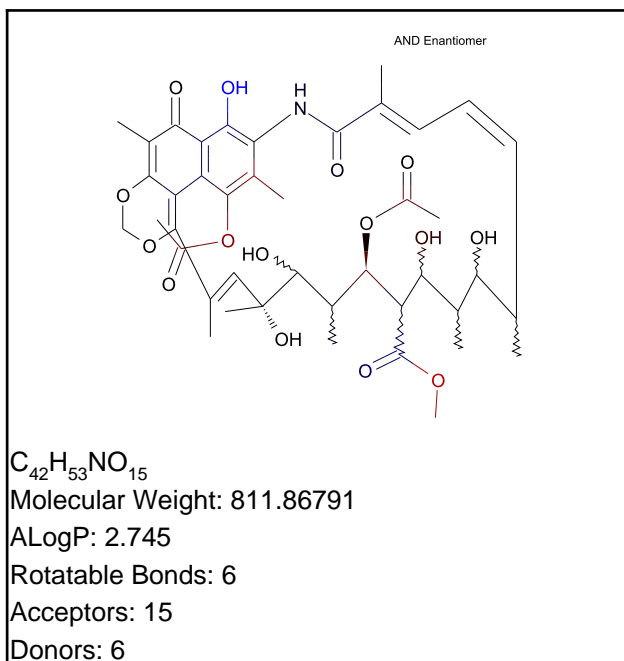

### Model Prediction

Prediction: 0.020

Unit: g/kg\_body\_weight

Mahalanobis Distance: 14.592

Mahalanobis Distance p-value: 7.96e-014

Mahalanobis Distance: The Mahalanobis distance (MD) is a generalization of the Euclidean distance that accounts for correlations among the X properties. It is calculated as the distance to the center of the training data. The larger the MD, the less trustworthy the prediction.

Mahalanobis Distance p-value: The p-value gives the fraction of training data with an MD greater than or equal to the one for the given sample, assuming normally distributed data. The smaller the p-value, the less trustworthy the prediction. For highly non-normal X properties (e.g., fingerprints), the MD p-value is wildly inaccurate.

### Structural Similar Compounds

| Name                        | ERYTHROMYCIN                                                                        | OXYTETRACYCLINE                                                                     | 4,4'-DIAMINO-2,2'-STILBENEDISULFONIC ACID.2NaSALT                                   |
|-----------------------------|-------------------------------------------------------------------------------------|-------------------------------------------------------------------------------------|-------------------------------------------------------------------------------------|
| Structure                   | 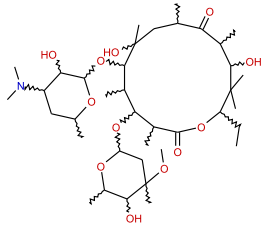 |  |  |
| Actual Endpoint (-log C)    | 3.29629                                                                             | 2.36214                                                                             | 2.50759                                                                             |
| Predicted Endpoint (-log C) | 4.83895                                                                             | 2.77834                                                                             | 3.26068                                                                             |
| Distance                    | 0.962                                                                               | 1.168                                                                               | 1.445                                                                               |
| Reference                   | NCI/NTP TR-338                                                                      | NCI/NTP TR-315                                                                      | NCI/NTP TR-412                                                                      |

### Model Applicability

Unknown features are fingerprint features in the query molecule, but not found in the training set.

1. Molecular\_Weight out of range. Value: 811.87. Training min, max, mean, SD: 74.122, 731.95, 245.25, 106.4.
2. Num\_H\_Acceptors out of range. Value: 15. Training min, max, mean, SD: 0, 13, 3.2809, 2.199.
3. Molecular\_PolarSurfaceArea out of range. Value: 244.67. Training min, max, mean, SD: 0, 201.84, 63.052, 40.7.
4. Molecular\_PolarSASA out of range. Value: 373.6. Training min, max, mean, SD: 0, 357.83, 109.38, 65.5.
5. OPS PC9 out of range. Value: 4.4196. Training min, max, SD, explained variance: -2.8548, 3.3954, 1.263, 0.0360.
6. OPS PC13 out of range. Value: 3.6245. Training min, max, SD, explained variance: -2.9619, 2.8704, 1.049, 0.0249.

### Feature Contribution

#### Top features for positive contribution

| Fingerprint | Bit/Smiles | Feature Structure | Score |
|-------------|------------|-------------------|-------|
|             |            |                   |       |

|                                        |             |                                                                                                          |        |
|----------------------------------------|-------------|----------------------------------------------------------------------------------------------------------|--------|
| FCFP_2                                 | 136627117   | 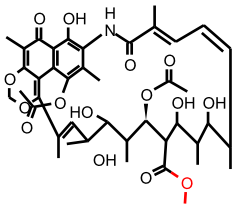<br>[*]OC             | 0.173  |
| FCFP_2                                 | -1143715940 | <br>[*]C[*]OC([*])[*] | 0.095  |
| FCFP_2                                 | 1036089772  | <br>[*]:[c](:[*])OC   | 0.075  |
| Top Features for negative contribution |             |                                                                                                          |        |
| Fingerprint                            | Bit/Smiles  | Feature Structure                                                                                        | Score  |
| FCFP_2                                 | 7           | <br>[*]O            | -0.214 |
| FCFP_2                                 | -549108873  | <br>[*]:[c](:[*])O  | -0.127 |

FCFP\_2

1872154524

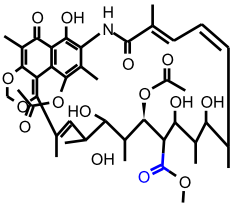

[\*]C(=O)[\*]

-0.105

# Simeprevir

# TOPKAT\_Rat\_Maximum\_Tolerated\_Dose\_Feed

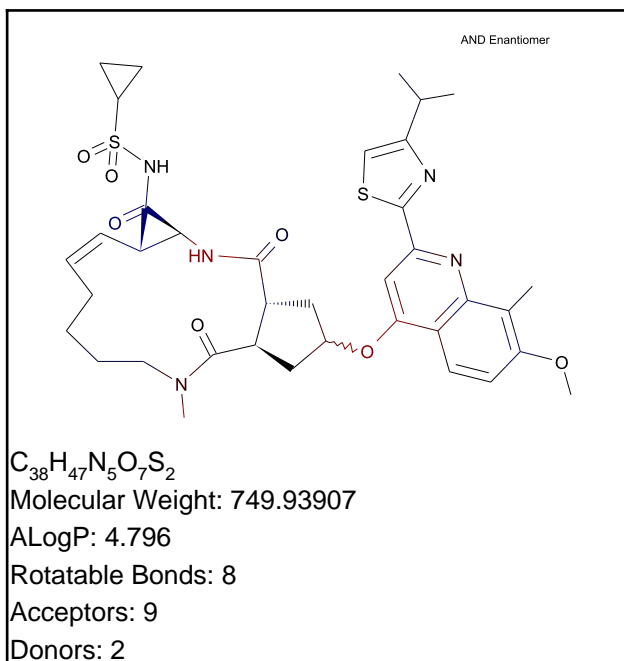

## Model Prediction

Prediction: 0.003

Unit: g/kg\_body\_weight

Mahalanobis Distance: 14.186

Mahalanobis Distance p-value: 5.46e-013

Mahalanobis Distance: The Mahalanobis distance (MD) is a generalization of the Euclidean distance that accounts for correlations among the X properties. It is calculated as the distance to the center of the training data. The larger the MD, the less trustworthy the prediction.

Mahalanobis Distance p-value: The p-value gives the fraction of training data with an MD greater than or equal to the one for the given sample, assuming normally distributed data. The smaller the p-value, the less trustworthy the prediction. For highly non-normal X properties (e.g., fingerprints), the MD p-value is wildly inaccurate.

## Structural Similar Compounds

| Name                        | C.I.PIGMENT RED 23                                                                  | RESERPINE                                                                           | SALICYLAZOSULFAPYRIDINE                                                             |
|-----------------------------|-------------------------------------------------------------------------------------|-------------------------------------------------------------------------------------|-------------------------------------------------------------------------------------|
| Structure                   | 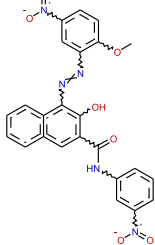 |  |  |
| Actual Endpoint (-log C)    | 2.30052                                                                             | 6.13118                                                                             | 3.375                                                                               |
| Predicted Endpoint (-log C) | 3.55333                                                                             | 4.38304                                                                             | 2.80292                                                                             |
| Distance                    | 0.861                                                                               | 0.934                                                                               | 1.035                                                                               |
| Reference                   | NCI/NTP TR-411                                                                      | NCI/NTP TR-193                                                                      | NCI/NTP TR-457                                                                      |

## Model Applicability

Unknown features are fingerprint features in the query molecule, but not found in the training set.

1. Molecular\_Weight out of range. Value: 749.94. Training min, max, mean, SD: 74.122, 731.95, 245.25, 106.4.
2. OPS\_PC9 out of range. Value: 5.11. Training min, max, SD, explained variance: -2.8548, 3.3954, 1.263, 0.0360.
3. OPS\_PC12 out of range. Value: -3.0299. Training min, max, SD, explained variance: -2.364, 2.9228, 1.079, 0.0263.
4. OPS\_PC14 out of range. Value: 4.236. Training min, max, SD, explained variance: -2.0656, 3.3808, 1.011, 0.0231.
5. Unknown FCFP\_2 feature: 690481386: [\*]:[c](:[\*])[c]1:n:[\*]:[\*]:s:1
6. Unknown FCFP\_2 feature: 1018942292: [\*]NS(=O)(=O)C1[\*][\*]1

## Feature Contribution

### Top features for positive contribution

| Fingerprint | Bit/Smiles | Feature Structure | Score |
|-------------|------------|-------------------|-------|
|             |            |                   |       |

| FCFP_2                                 | 136627117   | 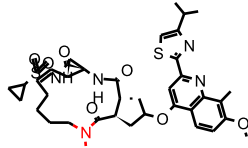<br><chem>[*]OC</chem>                 | 0.173  |
|----------------------------------------|-------------|---------------------------------------------------------------------------------------------------------------------------|--------|
| FCFP_2                                 | -885550502  | <br><chem>[*]C([*])NC(=[*])[*]</chem>  | 0.115  |
| FCFP_2                                 | 1036089772  | <br><chem>[*]:[c](:[*])OC</chem>       | 0.075  |
| Top Features for negative contribution |             |                                                                                                                           |        |
| Fingerprint                            | Bit/Smiles  | Feature Structure                                                                                                         | Score  |
| FCFP_2                                 | -1272798659 | <br><chem>[*]CCC([*])([*])[*]</chem> | -0.111 |
| FCFP_2                                 | 1872154524  | <br><chem>[*]C(=O)[*]</chem>         | -0.105 |

FCFP\_2

203677720

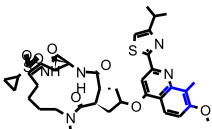

[\*]C[c](:[cH]:[\*]):[c  
H]:[\*]

-0.083



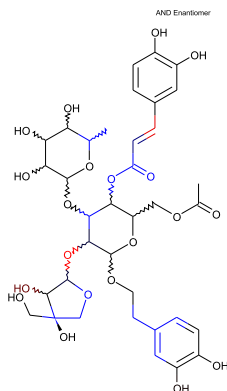
 $C_{36}H_{46}O_{20}$ 

Molecular Weight: 798.73843

ALogP: -0.546

Rotatable Bonds: 16

Acceptors: 20

Donors: 10

## Model Prediction

Prediction: 0.000

Unit: g/kg\_body\_weight

Mahalanobis Distance: 32.711

Mahalanobis Distance p-value: 1.81e-032

Mahalanobis Distance: The Mahalanobis distance (MD) is a generalization of the Euclidean distance that accounts for correlations among the X properties. It is calculated as the distance to the center of the training data. The larger the MD, the less trustworthy the prediction.

Mahalanobis Distance p-value: The p-value gives the fraction of training data with an MD greater than or equal to the one for the given sample, assuming normally distributed data. The smaller the p-value, the less trustworthy the prediction. For highly non-normal X properties (e.g., fingerprints), the MD p-value is wildly inaccurate.

## Structural Similar Compounds

| Name                        | AMPICILLIN TRIHYDRATE | OCHRATOXIN     | PENICILLIN VK  |
|-----------------------------|-----------------------|----------------|----------------|
| Structure                   |                       |                |                |
| Actual Endpoint (-log C)    | 2.36724               | 6.28396        | 2.54455        |
| Predicted Endpoint (-log C) | 2.27651               | 5.12358        | 3.9702         |
| Distance                    | 3.016                 | 3.070          | 3.220          |
| Reference                   | NCI/NTP TR-318        | NCI/NTP TR-358 | NCI/NTP TR-336 |

## Model Applicability

Unknown features are fingerprint features in the query molecule, but not found in the training set.

1. Molecular\_Weight out of range. Value: 798.74. Training min, max, mean, SD: 68.074, 434.63, 171.13, 85.06.
2. Num\_H\_Donors out of range. Value: 10. Training min, max, mean, SD: 0, 3, 0.4375, 0.8311.
3. Num\_H\_Acceptors out of range. Value: 20. Training min, max, mean, SD: 0, 6, 1.6146, 1.644.
4. Molecular\_PolarSASA out of range. Value: 473.59. Training min, max, mean, SD: 0, 223.97, 50.816, 55.15.
5. Molecular\_PolarSurfaceArea out of range. Value: 310.28. Training min, max, mean, SD: 0, 138.03, 28.978, 32.1.
6. OPS PC1 out of range. Value: 18.036. Training min, max, SD, explained variance: -4.0008, 7.9165, 2.861, 0.2531.
7. OPS PC3 out of range. Value: -5.0208. Training min, max, SD, explained variance: -4.6235, 5.1158, 1.773, 0.0972.
8. OPS PC4 out of range. Value: 6.5302. Training min, max, SD, explained variance: -2.9402, 6.1938, 1.581, 0.0773.
9. OPS PC5 out of range. Value: -3.4665. Training min, max, SD, explained variance: -3.4, 4.1587, 1.489, 0.0686.
10. Unknown FCFP\_2 feature: -415156552: [\*]C[C@@]1(O)C[\*][\*]C1[\*]

## Feature Contribution

### Top features for positive contribution

| Fingerprint | Bit/Smiles | Feature Structure | Score |
|-------------|------------|-------------------|-------|
|-------------|------------|-------------------|-------|

|                                        |            |                                                                                                                                            |        |
|----------------------------------------|------------|--------------------------------------------------------------------------------------------------------------------------------------------|--------|
| FCFP_2                                 | 1          | <p>AND Enantiomer</p> 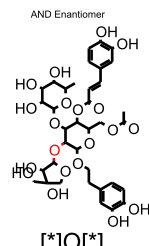 <p>[*]O[*]</p>                    | 0.511  |
| FCFP_2                                 | 451847724  | <p>AND Enantiomer</p>  <p>[*]\C=C\C(=[*])[*]</p>        | 0.225  |
| FCFP_2                                 | 3          | <p>AND Enantiomer</p>  <p>[*]O</p>                      | 0.104  |
| Top Features for negative contribution |            |                                                                                                                                            |        |
| Fingerprint                            | Bit/Smiles | Feature Structure                                                                                                                          | Score  |
| FCFP_2                                 | 136597326  | <p>AND Enantiomer</p>  <p>[*]C([*])C</p>               | -0.489 |
| FCFP_2                                 | 203677720  | <p>AND Enantiomer</p>  <p>[*]C[c](:[cH]:[*])H:[*]</p> | -0.406 |

FCFP\_2

565998553

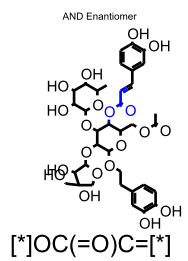

-0.348

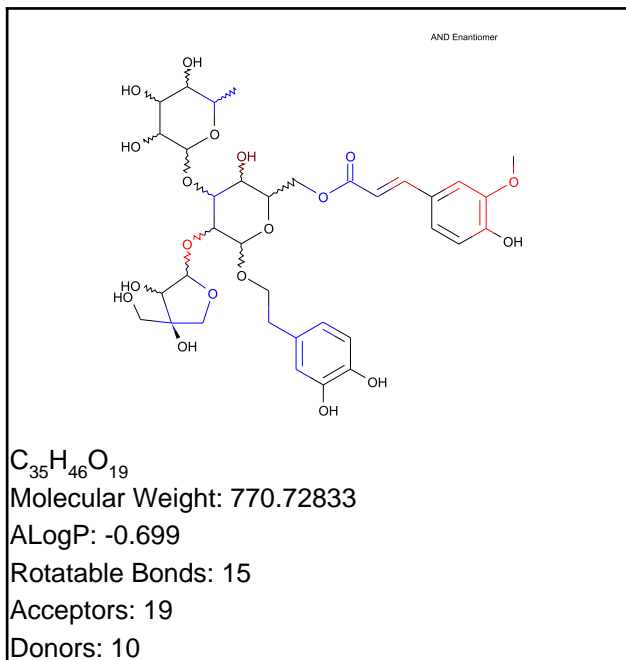

### Model Prediction

Prediction: 0.000

Unit: g/kg\_body\_weight

Mahalanobis Distance: 31.696

Mahalanobis Distance p-value: 1.36e-031

Mahalanobis Distance: The Mahalanobis distance (MD) is a generalization of the Euclidean distance that accounts for correlations among the X properties. It is calculated as the distance to the center of the training data. The larger the MD, the less trustworthy the prediction.

Mahalanobis Distance p-value: The p-value gives the fraction of training data with an MD greater than or equal to the one for the given sample, assuming normally distributed data. The smaller the p-value, the less trustworthy the prediction. For highly non-normal X properties (e.g., fingerprints), the MD p-value is wildly inaccurate.

### Structural Similar Compounds

| Name                        | AMPICILLIN TRIHYDRATE                                                               | OCHRATOXIN                                                                          | PENICILLIN VK                                                                       |
|-----------------------------|-------------------------------------------------------------------------------------|-------------------------------------------------------------------------------------|-------------------------------------------------------------------------------------|
| Structure                   | 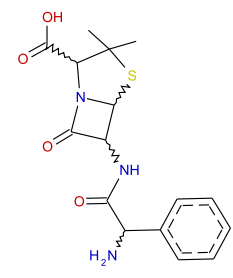 |  |  |
| Actual Endpoint (-log C)    | 2.36724                                                                             | 6.28396                                                                             | 2.54455                                                                             |
| Predicted Endpoint (-log C) | 2.27651                                                                             | 5.12358                                                                             | 3.9702                                                                              |
| Distance                    | 2.886                                                                               | 2.940                                                                               | 3.049                                                                               |
| Reference                   | NCI/NTP TR-318                                                                      | NCI/NTP TR-358                                                                      | NCI/NTP TR-336                                                                      |

### Model Applicability

Unknown features are fingerprint features in the query molecule, but not found in the training set.

1. Molecular\_Weight out of range. Value: 770.73. Training min, max, mean, SD: 68.074, 434.63, 171.13, 85.06.
2. Num\_H\_Donors out of range. Value: 10. Training min, max, mean, SD: 0, 3, 0.4375, 0.8311.
3. Num\_H\_Acceptors out of range. Value: 19. Training min, max, mean, SD: 0, 6, 1.6146, 1.644.
4. Molecular\_PolarSASA out of range. Value: 446.75. Training min, max, mean, SD: 0, 223.97, 50.816, 55.15.
5. Molecular\_PolarSurfaceArea out of range. Value: 293.2. Training min, max, mean, SD: 0, 138.03, 28.978, 32.1.
6. OPS PC1 out of range. Value: 17.908. Training min, max, SD, explained variance: -4.0008, 7.9165, 2.861, 0.2531.
7. OPS PC5 out of range. Value: -4.1198. Training min, max, SD, explained variance: -3.4, 4.1587, 1.489, 0.0686.
8. Unknown FCFP\_2 feature: -415156552: [\*]C[C@@]1(O)C[\*][\*]C1[\*]

### Feature Contribution

#### Top features for positive contribution

| Fingerprint | Bit/Smiles | Feature Structure | Score |
|-------------|------------|-------------------|-------|
|             |            |                   |       |

|                                        |            |                                                                                                                                     |        |
|----------------------------------------|------------|-------------------------------------------------------------------------------------------------------------------------------------|--------|
| FCFP_2                                 | 332760439  | 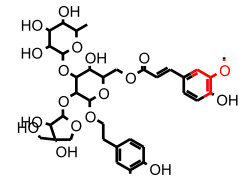<br><chem>[*]O[c](:[cH]:[*]):[c]([*]):[*]</chem> | 0.672  |
| FCFP_2                                 | 1          | <br><chem>[*]O[*]</chem>                         | 0.511  |
| FCFP_2                                 | 451847724  | <br><chem>[*]C=C\C(=[*])[*]</chem>               | 0.225  |
| Top Features for negative contribution |            |                                                                                                                                     |        |
| Fingerprint                            | Bit/Smiles | Feature Structure                                                                                                                   | Score  |
| FCFP_2                                 | 136597326  | <br><chem>[*]C([*])C</chem>                    | -0.489 |
| FCFP_2                                 | 203677720  | <br><chem>[*]C[c](:[cH]:[*]):[c]H:[*]</chem>   | -0.406 |

|        |           |                                                                                                                                         |        |
|--------|-----------|-----------------------------------------------------------------------------------------------------------------------------------------|--------|
| FCFP_2 | 565998553 | 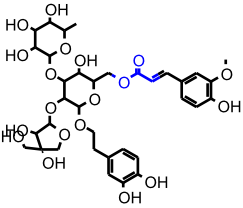 <p data-bbox="1402 321 1575 349">[*]OC(=O)C=[*]</p> | -0.348 |
|--------|-----------|-----------------------------------------------------------------------------------------------------------------------------------------|--------|

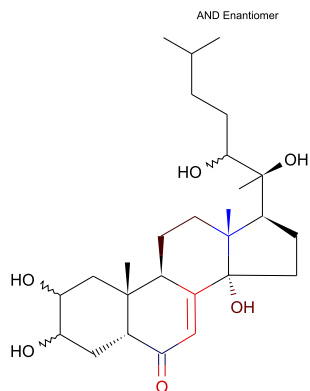

$C_{27}H_{44}O_6$

Molecular Weight: 464.63466

ALogP: 2.489

Rotatable Bonds: 5

Acceptors: 6

Donors: 5

## Model Prediction

Prediction: 0.011

Unit: g/kg\_body\_weight

Mahalanobis Distance: 15.608

Mahalanobis Distance p-value: 7.66e-014

Mahalanobis Distance: The Mahalanobis distance (MD) is a generalization of the Euclidean distance that accounts for correlations among the X properties. It is calculated as the distance to the center of the training data. The larger the MD, the less trustworthy the prediction.

Mahalanobis Distance p-value: The p-value gives the fraction of training data with an MD greater than or equal to the one for the given sample, assuming normally distributed data. The smaller the p-value, the less trustworthy the prediction. For highly non-normal X properties (e.g., fingerprints), the MD p-value is wildly inaccurate.

## Structural Similar Compounds

| Name                        | OCHRATOXIN     | LITHOCHLOLIC ACID | AMPICILLIN TRIHYDRATE |
|-----------------------------|----------------|-------------------|-----------------------|
| Structure                   |                |                   |                       |
| Actual Endpoint (-log C)    | 6.28396        | 2.87689           | 2.36724               |
| Predicted Endpoint (-log C) | 5.12358        | 3.8262            | 2.27651               |
| Distance                    | 1.097          | 1.139             | 1.149                 |
| Reference                   | NCI/NTP TR-358 | NCI/NTP TR-175    | NCI/NTP TR-318        |

## Model Applicability

Unknown features are fingerprint features in the query molecule, but not found in the training set.

1. Molecular\_Weight out of range. Value: 464.63. Training min, max, mean, SD: 68.074, 434.63, 171.13, 85.06.
2. Num\_H\_Donors out of range. Value: 5. Training min, max, mean, SD: 0, 3, 0.4375, 0.8311.
3. OPS\_PC7 out of range. Value: -3.0183. Training min, max, SD, explained variance: -2.8003, 2.9332, 1.16, 0.0416.
4. Unknown FCFP\_2 feature: -415156552: [\*]C[C@@]1(O)C[\*][\*]C1[\*]

## Feature Contribution

### Top features for positive contribution

| Fingerprint | Bit/Smiles | Feature Structure | Score |
|-------------|------------|-------------------|-------|
| FCFP_2      | 1          | <br>[*]O[*]       | 0.511 |

|                                        |            |                                                                                                                       |        |
|----------------------------------------|------------|-----------------------------------------------------------------------------------------------------------------------|--------|
| FCFP_2                                 | 451847724  | 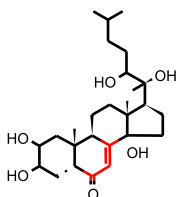<br><chem>[*]C=C\C(=[*])[*]</chem> | 0.225  |
| FCFP_2                                 | 3          | <br><chem>[*]O</chem>              | 0.104  |
| Top Features for negative contribution |            |                                                                                                                       |        |
| Fingerprint                            | Bit/Smiles | Feature Structure                                                                                                     | Score  |
| FCFP_2                                 | 136597326  | <br><chem>[*]C([*])C</chem>        | -0.489 |
| FCFP_2                                 | 1872154524 | <br><chem>[*]C(=O)[*]</chem>      | -0.307 |
| FCFP_2                                 | 0          | <br><chem>[*]C([*])[*]</chem>    | -0.290 |





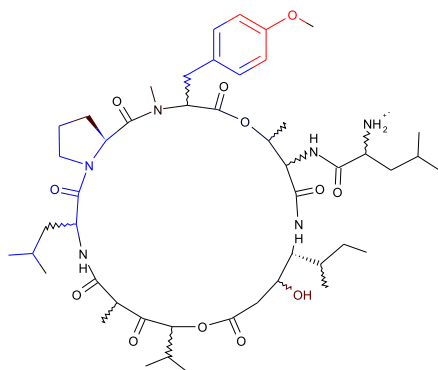

$C_{49}H_{79}N_6O_{12}$

Molecular Weight: 944.18455

ALogP: 3.176

Rotatable Bonds: 13

Acceptors: 12

Donors: 5

## Model Prediction

Prediction: 0.000

Unit: g/kg\_body\_weight

Mahalanobis Distance: 21.220

Mahalanobis Distance p-value: 5.69e-021

Mahalanobis Distance: The Mahalanobis distance (MD) is a generalization of the Euclidean distance that accounts for correlations among the X properties. It is calculated as the distance to the center of the training data. The larger the MD, the less trustworthy the prediction.

Mahalanobis Distance p-value: The p-value gives the fraction of training data with an MD greater than or equal to the one for the given sample, assuming normally distributed data. The smaller the p-value, the less trustworthy the prediction. For highly non-normal X properties (e.g., fingerprints), the MD p-value is wildly inaccurate.

## Structural Similar Compounds

| Name                        | OCHRATOXIN     | AMPICILLIN TRIHYDRATE | PENICILLIN VK  |
|-----------------------------|----------------|-----------------------|----------------|
| Structure                   |                |                       |                |
| Actual Endpoint (-log C)    | 6.28396        | 2.36724               | 2.54455        |
| Predicted Endpoint (-log C) | 5.12358        | 2.27651               | 3.9702         |
| Distance                    | 2.033          | 2.072                 | 2.076          |
| Reference                   | NCI/NTP TR-358 | NCI/NTP TR-318        | NCI/NTP TR-336 |

## Model Applicability

Unknown features are fingerprint features in the query molecule, but not found in the training set.

1. Molecular\_Weight out of range. Value: 944.18. Training min, max, mean, SD: 68.074, 434.63, 171.13, 85.06.
2. Num\_H\_Donors out of range. Value: 5. Training min, max, mean, SD: 0, 3, 0.4375, 0.8311.
3. Num\_H\_Acceptors out of range. Value: 12. Training min, max, mean, SD: 0, 6, 1.6146, 1.644.
4. Molecular\_PolarSASA out of range. Value: 320.47. Training min, max, mean, SD: 0, 223.97, 50.816, 55.15.
5. Molecular\_PolarSurfaceArea out of range. Value: 243.65. Training min, max, mean, SD: 0, 138.03, 28.978, 32.1.
6. OPS PC1 out of range. Value: 12.091. Training min, max, SD, explained variance: -4.0008, 7.9165, 2.861, 0.2531.
7. OPS PC5 out of range. Value: -4.779. Training min, max, SD, explained variance: -3.4, 4.1587, 1.489, 0.0686.
8. OPS PC6 out of range. Value: -3.2308. Training min, max, SD, explained variance: -2.4321, 2.9885, 1.256, 0.0488.
9. Unknown FCFP\_2 feature: 10: [\*][NH2+][\*]
10. Unknown FCFP\_2 feature: 18028531: [\*]C([\*])[NH2+]C
11. Unknown FCFP\_2 feature: -1817836174: [\*]CC([NH2+][\*])C(=[\*])[\*]
12. Unknown FCFP\_2 feature: 136418580: [\*][NH2+]C

## Feature Contribution

Top features for positive contribution

| Fingerprint                            | Bit/Smiles | Feature Structure                                                                                                                   | Score  |
|----------------------------------------|------------|-------------------------------------------------------------------------------------------------------------------------------------|--------|
| FCFP_2                                 | 332760439  | 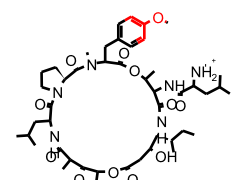<br><chem>[*]O[c](:[cH]:[*]):[c]([*]):[*]</chem> | 0.672  |
| FCFP_2                                 | 1          | <br><chem>[*]O[*]</chem>                         | 0.511  |
| FCFP_2                                 | 3          | <br><chem>[*]O</chem>                            | 0.104  |
| Top Features for negative contribution |            |                                                                                                                                     |        |
| Fingerprint                            | Bit/Smiles | Feature Structure                                                                                                                   | Score  |
| FCFP_2                                 | 136597326  | <br><chem>[*]C([*])C</chem>                    | -0.489 |
|                                        |            |                                                                                                                                     |        |

|        |           |                                                                                                                                 |        |
|--------|-----------|---------------------------------------------------------------------------------------------------------------------------------|--------|
| FCFP_2 | 203677720 | 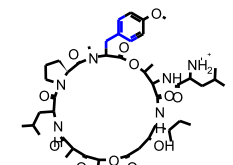<br><chem>[*]C[c](:[cH]:[*]):[cH]:[*]</chem> | -0.406 |
| FCFP_2 | 565998553 | <br><chem>[*]OC(=O)C=[*]</chem>              | -0.348 |

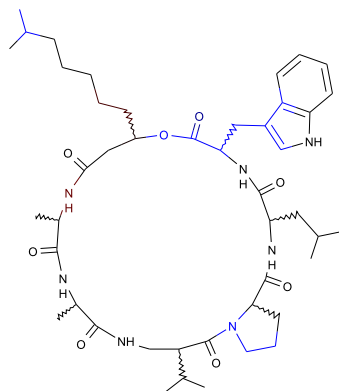

$C_{45}H_{69}N_7O_8$

Molecular Weight: 836.07145

ALogP: 4.986

Rotatable Bonds: 11

Acceptors: 8

Donors: 6

## Model Prediction

Prediction: 0.076

Unit: g/kg\_body\_weight

Mahalanobis Distance: 20.938

Mahalanobis Distance p-value: 1.22e-020

Mahalanobis Distance: The Mahalanobis distance (MD) is a generalization of the Euclidean distance that accounts for correlations among the X properties. It is calculated as the distance to the center of the training data. The larger the MD, the less trustworthy the prediction.

Mahalanobis Distance p-value: The p-value gives the fraction of training data with an MD greater than or equal to the one for the given sample, assuming normally distributed data. The smaller the p-value, the less trustworthy the prediction. For highly non-normal X properties (e.g., fingerprints), the MD p-value is wildly inaccurate.

## Structural Similar Compounds

| Name                        | OCHRATOXIN     | AMPICILLIN TRIHYDRATE | PENICILLIN VK  |
|-----------------------------|----------------|-----------------------|----------------|
| Structure                   |                |                       |                |
| Actual Endpoint (-log C)    | 6.28396        | 2.36724               | 2.54455        |
| Predicted Endpoint (-log C) | 5.12358        | 2.27651               | 3.9702         |
| Distance                    | 1.679          | 1.876                 | 1.880          |
| Reference                   | NCI/NTP TR-358 | NCI/NTP TR-318        | NCI/NTP TR-336 |

## Model Applicability

Unknown features are fingerprint features in the query molecule, but not found in the training set.

1. Molecular\_Weight out of range. Value: 836.07. Training min, max, mean, SD: 68.074, 434.63, 171.13, 85.06.
2. Num\_H\_Donors out of range. Value: 6. Training min, max, mean, SD: 0, 3, 0.4375, 0.8311.
3. Num\_H\_Acceptors out of range. Value: 8. Training min, max, mean, SD: 0, 6, 1.6146, 1.644.
4. Molecular\_PolarSASA out of range. Value: 302.44. Training min, max, mean, SD: 0, 223.97, 50.816, 55.15.
5. Molecular\_PolarSurfaceArea out of range. Value: 207.89. Training min, max, mean, SD: 0, 138.03, 28.978, 32.1.
6. OPS\_PC1 out of range. Value: 10.753. Training min, max, SD, explained variance: -4.0008, 7.9165, 2.861, 0.2531.
7. OPS\_PC9 out of range. Value: -3.927. Training min, max, SD, explained variance: -2.7086, 2.9267, 1.019, 0.0321.
8. Unknown FCFP\_2 feature: 19: [\*]:[nH]:[\*]
9. Unknown FCFP\_2 feature: 1618184456: [\*][c]1:[\*]:[\*]:[nH]:c:1
10. Unknown FCFP\_2 feature: 307448885: [\*]:[c]1:[\*]:[\*]:[nH]:[c]:1:c:[\*]
11. Unknown FCFP\_2 feature: 2005402822: [\*]:[c]1:[\*]:[\*]:c:[nH]:1

## Feature Contribution

### Top features for positive contribution

| Fingerprint | Bit/Smiles | Feature Structure | Score |
|-------------|------------|-------------------|-------|
|             |            |                   |       |

|                                        |             |                                                                                                                      |        |
|----------------------------------------|-------------|----------------------------------------------------------------------------------------------------------------------|--------|
| FCFP_2                                 | 1           | 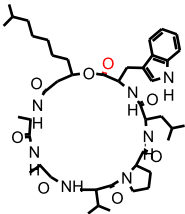<br>[*]O[*]                       | 0.511  |
| FCFP_2                                 | 3           | <br>[*]O                          | 0.104  |
| FCFP_2                                 | -1272798659 | <br>[*]CCC([*])([*])[*]           | 0.070  |
| Top Features for negative contribution |             |                                                                                                                      |        |
| Fingerprint                            | Bit/Smiles  | Feature Structure                                                                                                    | Score  |
| FCFP_2                                 | 136597326   | <br>[*]C([*])C                  | -0.489 |
| FCFP_2                                 | 203677720   | <br>[*]C[c](:[cH]:[*]):[cH]:[*] | -0.406 |

|        |           |                                                                                                                                         |        |
|--------|-----------|-----------------------------------------------------------------------------------------------------------------------------------------|--------|
| FCFP_2 | 565998553 | 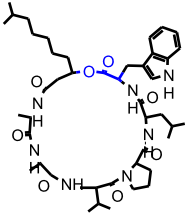 <p data-bbox="1396 321 1575 354">[*]OC(=O)C=[*]</p> | -0.348 |
|--------|-----------|-----------------------------------------------------------------------------------------------------------------------------------------|--------|

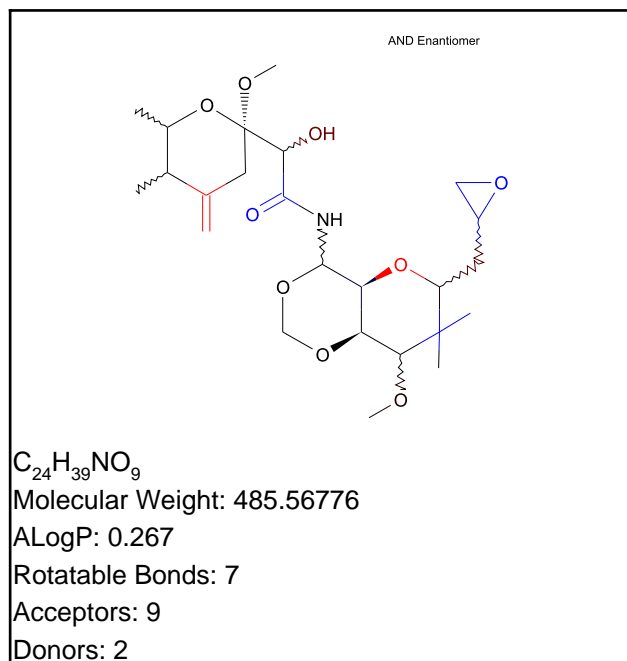

### Model Prediction

Prediction: 0.000

Unit: g/kg\_body\_weight

Mahalanobis Distance: 14.212

Mahalanobis Distance p-value: 6.51e-012

Mahalanobis Distance: The Mahalanobis distance (MD) is a generalization of the Euclidean distance that accounts for correlations among the X properties. It is calculated as the distance to the center of the training data. The larger the MD, the less trustworthy the prediction.

Mahalanobis Distance p-value: The p-value gives the fraction of training data with an MD greater than or equal to the one for the given sample, assuming normally distributed data. The smaller the p-value, the less trustworthy the prediction. For highly non-normal X properties (e.g., fingerprints), the MD p-value is wildly inaccurate.

### Structural Similar Compounds

| Name                        | PENICILLIN VK                                                                       | AMPICILLIN TRIHYDRATE                                                               | OCHRATOXIN                                                                          |
|-----------------------------|-------------------------------------------------------------------------------------|-------------------------------------------------------------------------------------|-------------------------------------------------------------------------------------|
| Structure                   | 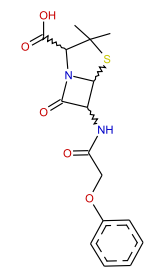 |  |  |
| Actual Endpoint (-log C)    | 2.54455                                                                             | 2.36724                                                                             | 6.28396                                                                             |
| Predicted Endpoint (-log C) | 3.9702                                                                              | 2.27651                                                                             | 5.12358                                                                             |
| Distance                    | 0.867                                                                               | 1.038                                                                               | 1.144                                                                               |
| Reference                   | NCI/NTP TR-336                                                                      | NCI/NTP TR-318                                                                      | NCI/NTP TR-358                                                                      |

### Model Applicability

Unknown features are fingerprint features in the query molecule, but not found in the training set.

1. Molecular\_Weight out of range. Value: 485.57. Training min, max, mean, SD: 68.074, 434.63, 171.13, 85.06.
2. Num\_H\_Acceptors out of range. Value: 9. Training min, max, mean, SD: 0, 6, 1.6146, 1.644.
3. OPS\_PC2 out of range. Value: 5.1088. Training min, max, SD, explained variance: -5.7911, 4.8501, 2.284, 0.1613.
4. Unknown FCFP\_2 feature: 699559848: [\*]NC(O[\*])C([\*])[\*]
5. Unknown FCFP\_2 feature: 470041467: [\*]OCO[\*]
6. Unknown FCFP\_2 feature: 1327594201: [\*]CC(O[\*])(O[\*])C([\*])[\*]

### Feature Contribution

#### Top features for positive contribution

| Fingerprint | Bit/Smiles | Feature Structure                                                                                                 | Score |
|-------------|------------|-------------------------------------------------------------------------------------------------------------------|-------|
| FCFP_2      | 129344189  | 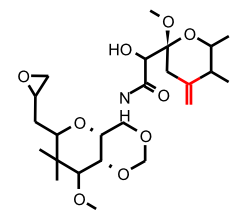<br><chem>[*]C(=C)[*]</chem> | 0.519 |



|                                        |            |                                                                                                                    |        |
|----------------------------------------|------------|--------------------------------------------------------------------------------------------------------------------|--------|
| FCFP_2                                 | 1          | 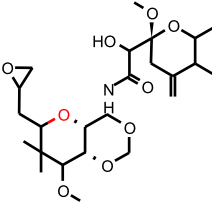<br><chem>[*]O[*]</chem>        | 0.511  |
| FCFP_2                                 | 3          | <br><chem>[*]O</chem>           | 0.104  |
| Top Features for negative contribution |            |                                                                                                                    |        |
| Fingerprint                            | Bit/Smiles | Feature Structure                                                                                                  | Score  |
| FCFP_2                                 | 136597326  | <br><chem>[*]C([*])C</chem>     | -0.489 |
| FCFP_2                                 | 1872154524 | <br><chem>[*]C(=O)[*]</chem>   | -0.307 |
| FCFP_2                                 | 0          | <br><chem>[*]C([*])[*]</chem> | -0.290 |



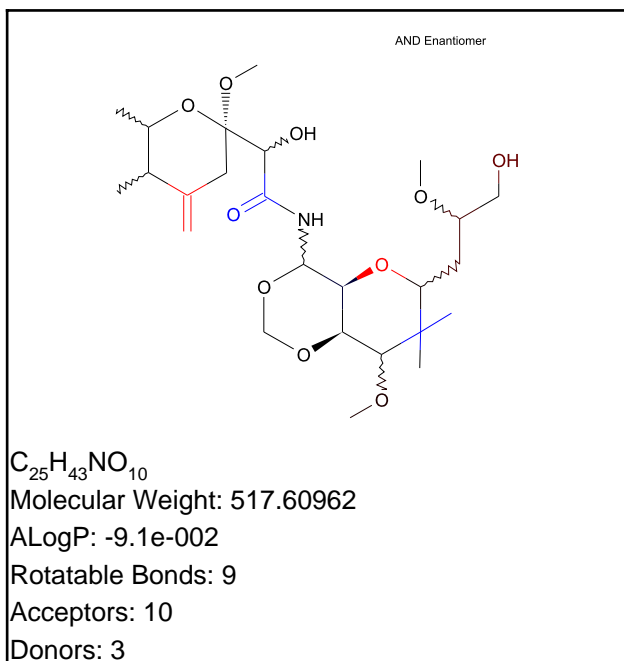

### Model Prediction

Prediction: 0.000

Unit: g/kg\_body\_weight

Mahalanobis Distance: 14.314

Mahalanobis Distance p-value: 4.69e-012

Mahalanobis Distance: The Mahalanobis distance (MD) is a generalization of the Euclidean distance that accounts for correlations among the X properties. It is calculated as the distance to the center of the training data. The larger the MD, the less trustworthy the prediction.

Mahalanobis Distance p-value: The p-value gives the fraction of training data with an MD greater than or equal to the one for the given sample, assuming normally distributed data. The smaller the p-value, the less trustworthy the prediction. For highly non-normal X properties (e.g., fingerprints), the MD p-value is wildly inaccurate.

### Structural Similar Compounds

| Name                        | PENICILLIN VK                                                                       | AMPICILLIN TRIHYDRATE                                                               | OCHRATOXIN                                                                          |
|-----------------------------|-------------------------------------------------------------------------------------|-------------------------------------------------------------------------------------|-------------------------------------------------------------------------------------|
| Structure                   | 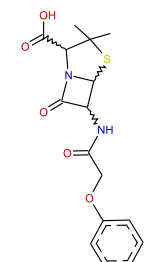 |  |  |
| Actual Endpoint (-log C)    | 2.54455                                                                             | 2.36724                                                                             | 6.28396                                                                             |
| Predicted Endpoint (-log C) | 3.9702                                                                              | 2.27651                                                                             | 5.12358                                                                             |
| Distance                    | 1.058                                                                               | 1.079                                                                               | 1.222                                                                               |
| Reference                   | NCI/NTP TR-336                                                                      | NCI/NTP TR-318                                                                      | NCI/NTP TR-358                                                                      |

### Model Applicability

Unknown features are fingerprint features in the query molecule, but not found in the training set.

1. Molecular\_Weight out of range. Value: 517.61. Training min, max, mean, SD: 68.074, 434.63, 171.13, 85.06.
2. Num\_H\_Acceptors out of range. Value: 10. Training min, max, mean, SD: 0, 6, 1.6146, 1.644.
3. Unknown FCFP\_2 feature: 699559848: [\*]NC(O[\*])C([\*])[\*]
4. Unknown FCFP\_2 feature: 470041467: [\*]OCO[\*]
5. Unknown FCFP\_2 feature: 1327594201: [\*]CC(O[\*])(O[\*])C([\*])[\*]

### Feature Contribution

#### Top features for positive contribution

| Fingerprint | Bit/Smiles | Feature Structure                                                                                    | Score |
|-------------|------------|------------------------------------------------------------------------------------------------------|-------|
| FCFP_2      | 129344189  | 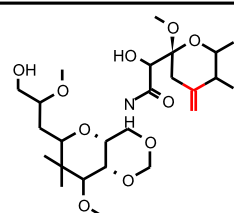<br>[*]C(=C)[*] | 0.519 |

|                                        |            |                                                                                                                    |        |
|----------------------------------------|------------|--------------------------------------------------------------------------------------------------------------------|--------|
| FCFP_2                                 | 1          | 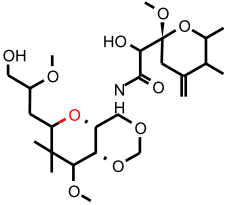<br><chem>[*]O[*]</chem>        | 0.511  |
| FCFP_2                                 | 3          | <br><chem>[*]O</chem>           | 0.104  |
| Top Features for negative contribution |            |                                                                                                                    |        |
| Fingerprint                            | Bit/Smiles | Feature Structure                                                                                                  | Score  |
| FCFP_2                                 | 136597326  | <br><chem>[*]C([*])C</chem>     | -0.489 |
| FCFP_2                                 | 1872154524 | <br><chem>[*]C(=O)[*]</chem>  | -0.307 |
| FCFP_2                                 | 0          | <br><chem>[*]C([*])[*]</chem> | -0.290 |



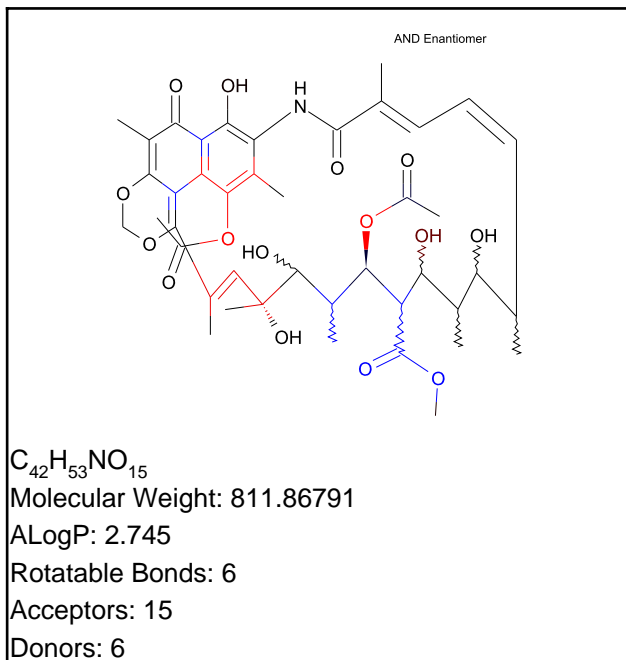

### Model Prediction

Prediction: 0.000

Unit: g/kg\_body\_weight

Mahalanobis Distance: 21.357

Mahalanobis Distance p-value: 3.92e-021

Mahalanobis Distance: The Mahalanobis distance (MD) is a generalization of the Euclidean distance that accounts for correlations among the X properties. It is calculated as the distance to the center of the training data. The larger the MD, the less trustworthy the prediction.

Mahalanobis Distance p-value: The p-value gives the fraction of training data with an MD greater than or equal to the one for the given sample, assuming normally distributed data. The smaller the p-value, the less trustworthy the prediction. For highly non-normal X properties (e.g., fingerprints), the MD p-value is wildly inaccurate.

### Structural Similar Compounds

| Name                        | OCHRATOXIN                                                                          | AMPICILLIN TRIHYDRATE                                                               | PENICILLIN VK                                                                       |
|-----------------------------|-------------------------------------------------------------------------------------|-------------------------------------------------------------------------------------|-------------------------------------------------------------------------------------|
| Structure                   | 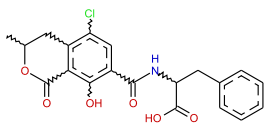 |  |  |
| Actual Endpoint (-log C)    | 6.28396                                                                             | 2.36724                                                                             | 2.54455                                                                             |
| Predicted Endpoint (-log C) | 5.12358                                                                             | 2.27651                                                                             | 3.9702                                                                              |
| Distance                    | 2.082                                                                               | 2.101                                                                               | 2.191                                                                               |
| Reference                   | NCI/NTP TR-358                                                                      | NCI/NTP TR-318                                                                      | NCI/NTP TR-336                                                                      |

### Model Applicability

Unknown features are fingerprint features in the query molecule, but not found in the training set.

1. Molecular\_Weight out of range. Value: 811.87. Training min, max, mean, SD: 68.074, 434.63, 171.13, 85.06.
2. Num\_H\_Donors out of range. Value: 6. Training min, max, mean, SD: 0, 3, 0.4375, 0.8311.
3. Num\_H\_Acceptors out of range. Value: 15. Training min, max, mean, SD: 0, 6, 1.6146, 1.644.
4. Molecular\_PolarSASA out of range. Value: 373.6. Training min, max, mean, SD: 0, 223.97, 50.816, 55.15.
5. Molecular\_PolarSurfaceArea out of range. Value: 244.67. Training min, max, mean, SD: 0, 138.03, 28.978, 32.1.
6. OPS PC1 out of range. Value: 13.716. Training min, max, SD, explained variance: -4.0008, 7.9165, 2.861, 0.2531.
7. Unknown FCFP\_2 feature: -415156552: [\*]C[C@]1(O)C[\*][\*]C1[\*]
8. Unknown FCFP\_2 feature: 436915834: [\*]OC(=C([\*])[\*])C(=[\*])[\*]
9. Unknown FCFP\_2 feature: -1678275541: [\*]C(=C(C(=[\*])[\*])[c]([\*]):[\*])[\*]
10. Unknown FCFP\_2 feature: 470041467: [\*]OCO[\*]
11. Unknown FCFP\_2 feature: -1549192822: [\*]C(=[\*])C(=O)[c]([\*]):[\*]

### Feature Contribution

| Top features for positive contribution |            |                   |       |
|----------------------------------------|------------|-------------------|-------|
| Fingerprint                            | Bit/Smiles | Feature Structure | Score |
|                                        |            |                   |       |

|                                        |            |                                                                                                                                     |        |
|----------------------------------------|------------|-------------------------------------------------------------------------------------------------------------------------------------|--------|
| FCFP_2                                 | 332760439  | 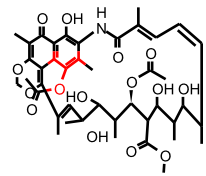<br><chem>[*]O[c](:[cH]:[*]):[c]([*]):[*]</chem> | 0.672  |
| FCFP_2                                 | 1          | <br><chem>[*]O[*]</chem>                         | 0.511  |
| FCFP_2                                 | 451847724  | <br><chem>[*]C=C\C(=[*])[*]</chem>               | 0.225  |
| Top Features for negative contribution |            |                                                                                                                                     |        |
| Fingerprint                            | Bit/Smiles | Feature Structure                                                                                                                   | Score  |
| FCFP_2                                 | 136597326  | <br><chem>[*]C([*])C</chem>                    | -0.489 |
| FCFP_2                                 | 203677720  | <br><chem>[*]C[c](:[cH]:[*]):[cH]:[*]</chem>   | -0.406 |

|        |           |                                                                                                                                         |        |
|--------|-----------|-----------------------------------------------------------------------------------------------------------------------------------------|--------|
| FCFP_2 | 565998553 | 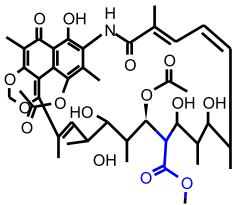 <p data-bbox="1392 321 1570 352">[*]OC(=O)C=[*]</p> | -0.348 |
|--------|-----------|-----------------------------------------------------------------------------------------------------------------------------------------|--------|



# Simeprevir

# TOPKAT\_Rat\_Maximum\_Tolerated\_Dose\_Gavage

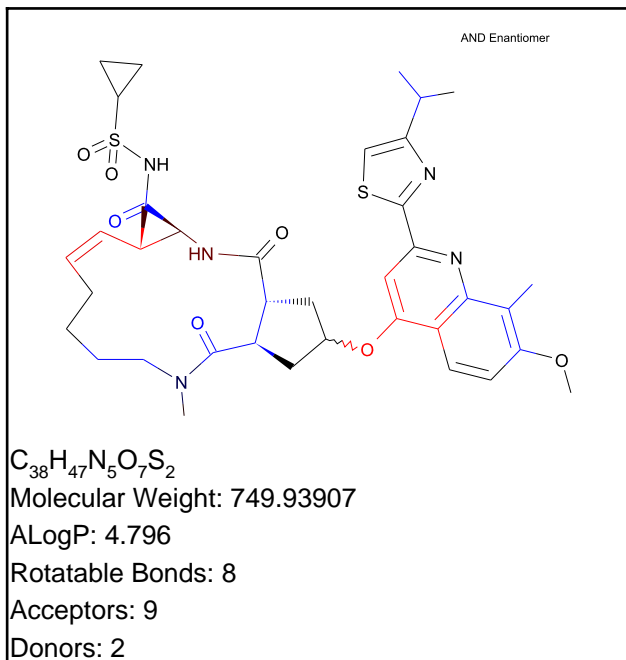

## Model Prediction

Prediction: 0.001

Unit: g/kg\_body\_weight

Mahalanobis Distance: 16.823

Mahalanobis Distance p-value: 1.77e-015

Mahalanobis Distance: The Mahalanobis distance (MD) is a generalization of the Euclidean distance that accounts for correlations among the X properties. It is calculated as the distance to the center of the training data. The larger the MD, the less trustworthy the prediction.

Mahalanobis Distance p-value: The p-value gives the fraction of training data with an MD greater than or equal to the one for the given sample, assuming normally distributed data. The smaller the p-value, the less trustworthy the prediction. For highly non-normal X properties (e.g., fingerprints), the MD p-value is wildly inaccurate.

## Structural Similar Compounds

| Name                        | OCHRATOXIN                                                                          | PENICILLIN VK                                                                       | AMPICILLIN TRIHYDRATE                                                               |
|-----------------------------|-------------------------------------------------------------------------------------|-------------------------------------------------------------------------------------|-------------------------------------------------------------------------------------|
| Structure                   | 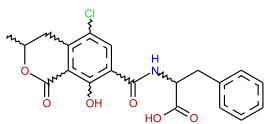 |  |  |
| Actual Endpoint (-log C)    | 6.28396                                                                             | 2.54455                                                                             | 2.36724                                                                             |
| Predicted Endpoint (-log C) | 5.12358                                                                             | 3.9702                                                                              | 2.27651                                                                             |
| Distance                    | 1.425                                                                               | 1.545                                                                               | 1.716                                                                               |
| Reference                   | NCI/NTP TR-358                                                                      | NCI/NTP TR-336                                                                      | NCI/NTP TR-318                                                                      |

## Model Applicability

Unknown features are fingerprint features in the query molecule, but not found in the training set.

1. Molecular\_Weight out of range. Value: 749.94. Training min, max, mean, SD: 68.074, 434.63, 171.13, 85.06.
2. Num\_H\_Acceptors out of range. Value: 9. Training min, max, mean, SD: 0, 6, 1.6146, 1.644.
3. Num\_AromaticRings out of range. Value: 3. Training min, max, mean, SD: 0, 2, 0.5625, 0.693.
4. Molecular\_PolarSASA out of range. Value: 272.1. Training min, max, mean, SD: 0, 223.97, 50.816, 55.15.
5. Molecular\_PolarSurfaceArea out of range. Value: 193.5. Training min, max, mean, SD: 0, 138.03, 28.978, 32.1.
6. OPS PC1 out of range. Value: 9.6287. Training min, max, SD, explained variance: -4.0008, 7.9165, 2.861, 0.2531.
7. OPS PC6 out of range. Value: -3.4118. Training min, max, SD, explained variance: -2.4321, 2.9885, 1.256, 0.0488.
8. Unknown FCFP\_2 feature: -415156552: [\*]C[C@@]1(O)C[\*][\*]C1[\*]
9. Unknown FCFP\_2 feature: 690511177: [\*]:n:[c]([c](:[\*]):[\*]):c:[\*]
10. Unknown FCFP\_2 feature: 690481386: [\*]:[c](:[\*])[c]1:n:[\*]:[\*]:s:1
11. Unknown FCFP\_2 feature: 1018942292: [\*]NS(=O)(=O)C1[\*][\*]1

## Feature Contribution

### Top features for positive contribution

| Fingerprint | Bit/Smiles | Feature Structure | Score |
|-------------|------------|-------------------|-------|
|             |            |                   |       |

|                                        |            |                                                                                                                                     |        |
|----------------------------------------|------------|-------------------------------------------------------------------------------------------------------------------------------------|--------|
| FCFP_2                                 | 332760439  | 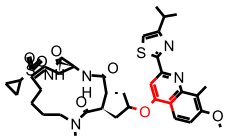<br><chem>[*]O[c](:[cH]:[*]):[c]([*]):[*]</chem> | 0.672  |
| FCFP_2                                 | 1          | <br><chem>[*]O[*]</chem>                         | 0.511  |
| FCFP_2                                 | 451847724  | <br><chem>[*]C=C\C(=[*])[*]</chem>               | 0.225  |
| Top Features for negative contribution |            |                                                                                                                                     |        |
| Fingerprint                            | Bit/Smiles | Feature Structure                                                                                                                   | Score  |
| FCFP_2                                 | 136597326  | <br><chem>[*]C([*])C</chem>                    | -0.489 |
| FCFP_2                                 | 203677720  | <br><chem>[*]C[c](:[cH]:[*]):[cH]:[*]</chem>   | -0.406 |

|        |           |                                                                                                                                         |        |
|--------|-----------|-----------------------------------------------------------------------------------------------------------------------------------------|--------|
| FCFP_2 | 565998553 | 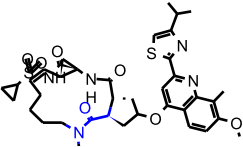 <p data-bbox="1388 298 1562 331">[*]OC(=O)C=[*]</p> | -0.348 |
|--------|-----------|-----------------------------------------------------------------------------------------------------------------------------------------|--------|

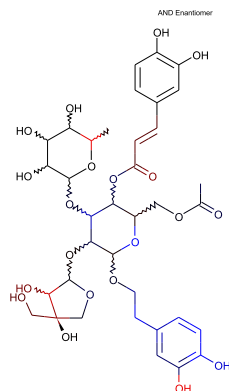

$C_{36}H_{46}O_{20}$

Molecular Weight: 798.73843

ALogP: -0.546

Rotatable Bonds: 16

Acceptors: 20

Donors: 10

## Model Prediction

Prediction: 4.282

Unit: g/kg\_body\_weight

Mahalanobis Distance: 32.165

Mahalanobis Distance p-value: 3.15e-081

Mahalanobis Distance: The Mahalanobis distance (MD) is a generalization of the Euclidean distance that accounts for correlations among the X properties. It is calculated as the distance to the center of the training data. The larger the MD, the less trustworthy the prediction.

Mahalanobis Distance p-value: The p-value gives the fraction of training data with an MD greater than or equal to the one for the given sample, assuming normally distributed data. The smaller the p-value, the less trustworthy the prediction. For highly non-normal X properties (e.g., fingerprints), the MD p-value is wildly inaccurate.

## Structural Similar Compounds

| Name                        | SECALONIC ACID   | STREPTOMYCIN      | NATAMYCIN      |
|-----------------------------|------------------|-------------------|----------------|
| Structure                   |                  |                   |                |
| Actual Endpoint (-log C)    | 4.463            | 1.81              | 2.387          |
| Predicted Endpoint (-log C) | 3.37815          | 2.20648           | 2.63572        |
| Distance                    | 1.590            | 1.592             | 1.610          |
| Reference                   | TXAPA9 48;A14;79 | 85ARAE 4;35;76/77 | TXAPA9 8;97;66 |

## Model Applicability

Unknown features are fingerprint features in the query molecule, but not found in the training set.

1. Num\_H\_Acceptors out of range. Value: 20. Training min, max, mean, SD: 0, 15, 3.0373, 1.958.
2. OPS PC4 out of range. Value: 13.771. Training min, max, SD, explained variance: -15.374, 12.471, 3.311, 0.0396.
3. OPS PC19 out of range. Value: -7.4333. Training min, max, SD, explained variance: -7.3465, 10.243, 1.885, 0.0128.
4. OPS PC38 out of range. Value: 6.5748. Training min, max, SD, explained variance: -4.9115, 5.821, 1.318, 0.0063.
5. Unknown ECFP\_2 feature: 1953003528: [\*]C[C@@]1(O)C[\*][\*]C1[\*]
6. Unknown FCFP\_6 feature: 16: [\*][c](:[\*]):[\*]
7. Unknown FCFP\_6 feature: -549108873: [\*]:[c](:[\*])O
8. Unknown FCFP\_6 feature: 451371068: [\*]\C=C\[c](:[\*]):[\*]
9. Unknown FCFP\_6 feature: 1618154665: [\*][c](:[\*]):[cH]:[c]([\*]):[\*]
10. Unknown FCFP\_6 feature: 74595001: [\*][c](:[\*]):[c](O):[cH]:[\*]

## Feature Contribution

### Top features for positive contribution

| Fingerprint | Bit/Smiles | Feature Structure | Score |
|-------------|------------|-------------------|-------|
|             |            |                   |       |

|                                        |             |                                                                                                                                                                 |        |
|----------------------------------------|-------------|-----------------------------------------------------------------------------------------------------------------------------------------------------------------|--------|
| ECFP_6                                 | 642810091   | <p>AND Enantiomer</p> 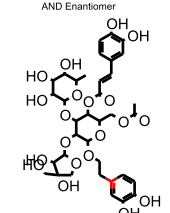 <p>[*][c](:[*]):[*]</p>                               | 0.281  |
| ECFP_6                                 | -1074141656 | <p>AND Enantiomer</p>  <p>[*]=O</p>                                          | 0.142  |
| ECFP_6                                 | 2019062761  | <p>AND Enantiomer</p>  <p>[*]:[c](:[*])O</p>                                 | 0.138  |
| Top Features for negative contribution |             |                                                                                                                                                                 |        |
| Fingerprint                            | Bit/Smiles  | Feature Structure                                                                                                                                               | Score  |
| ECFP_6                                 | 683445015   | <p>AND Enantiomer</p>  <p>[*]O[*]</p>                                      | -0.266 |
| FCFP_6                                 | 946589555   | <p>AND Enantiomer</p>  <p>[*][c]1:[*]:[c]([*]):<br/>[c](O):[cH]:[cH]:1</p> | -0.204 |

ECFP\_6

734603939

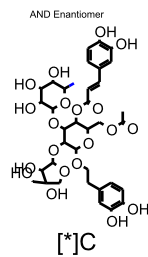

-0.201

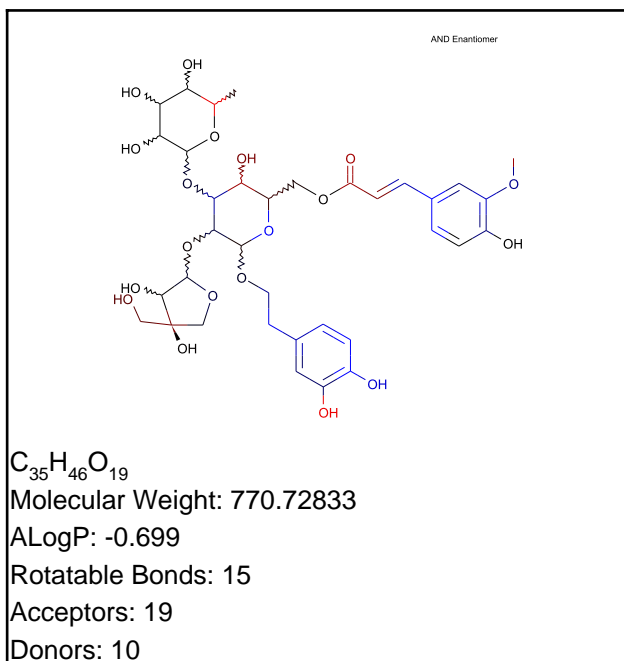

### Model Prediction

Prediction: 5.717

Unit: g/kg\_body\_weight

Mahalanobis Distance: 30.745

Mahalanobis Distance p-value: 6.72e-070

Mahalanobis Distance: The Mahalanobis distance (MD) is a generalization of the Euclidean distance that accounts for correlations among the X properties. It is calculated as the distance to the center of the training data. The larger the MD, the less trustworthy the prediction.

Mahalanobis Distance p-value: The p-value gives the fraction of training data with an MD greater than or equal to the one for the given sample, assuming normally distributed data. The smaller the p-value, the less trustworthy the prediction. For highly non-normal X properties (e.g., fingerprints), the MD p-value is wildly inaccurate.

### Structural Similar Compounds

| Name                        | SECALONIC ACID                                                                      | NATAMYCIN                                                                           | STREPTOMYCIN                                                                        |
|-----------------------------|-------------------------------------------------------------------------------------|-------------------------------------------------------------------------------------|-------------------------------------------------------------------------------------|
| Structure                   | 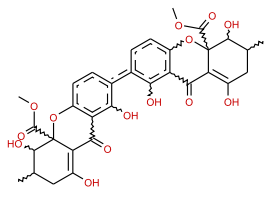 |  |  |
| Actual Endpoint (-log C)    | 4.463                                                                               | 2.387                                                                               | 1.81                                                                                |
| Predicted Endpoint (-log C) | 3.37815                                                                             | 2.63572                                                                             | 2.20648                                                                             |
| Distance                    | 1.468                                                                               | 1.495                                                                               | 1.558                                                                               |
| Reference                   | TXAPA9 48;A14;79                                                                    | TXAPA9 8;97;66                                                                      | 85ARAE 4;35;76/77                                                                   |

### Model Applicability

Unknown features are fingerprint features in the query molecule, but not found in the training set.

1. Num\_H\_Acceptors out of range. Value: 19. Training min, max, mean, SD: 0, 15, 3.0373, 1.958.
2. OPS PC4 out of range. Value: 13.261. Training min, max, SD, explained variance: -15.374, 12.471, 3.311, 0.0396.
3. Unknown ECFP\_2 feature: 1953003528: [\*]C[C@@]1(O)C[\*][\*]C1[\*]
4. Unknown FCFP\_6 feature: 16: [\*][c](:[\*]):[\*]
5. Unknown FCFP\_6 feature: -549108873: [\*]:[c](:[\*])O
6. Unknown FCFP\_6 feature: 1618154665: [\*][c](:[\*]):[cH]:[c]([\*]):[\*]
7. Unknown FCFP\_6 feature: 74595001: [\*][c](:[\*]):[c](O):[cH]:[\*]
8. Unknown FCFP\_6 feature: 451371068: [\*]C=C[c](:[\*]):[\*]

### Feature Contribution

#### Top features for positive contribution

| Fingerprint | Bit/Smiles | Feature Structure | Score |
|-------------|------------|-------------------|-------|
|             |            |                   |       |





FCFP\_6

946589555

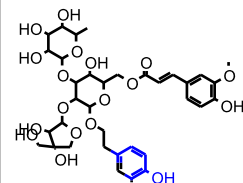

[\*][c]1:[\*]:[c]([\*]):  
[c](O):[cH]:[cH]:1

-0.204

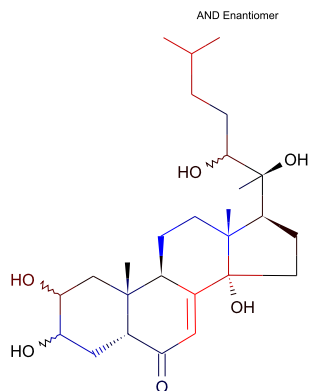
 $C_{27}H_{44}O_6$ 

Molecular Weight: 464.63466

ALogP: 2.489

Rotatable Bonds: 5

Acceptors: 6

Donors: 5

## Model Prediction

Prediction: 10.020

Unit: g/kg\_body\_weight

Mahalanobis Distance: 22.700

Mahalanobis Distance p-value: 2.33e-019

Mahalanobis Distance: The Mahalanobis distance (MD) is a generalization of the Euclidean distance that accounts for correlations among the X properties. It is calculated as the distance to the center of the training data. The larger the MD, the less trustworthy the prediction.

Mahalanobis Distance p-value: The p-value gives the fraction of training data with an MD greater than or equal to the one for the given sample, assuming normally distributed data. The smaller the p-value, the less trustworthy the prediction. For highly non-normal X properties (e.g., fingerprints), the MD p-value is wildly inaccurate.

## Structural Similar Compounds

| Name                        | PROSCILLARIDIN   | CORTISOL; 21-(DIHYDROGEN PHOSPHATE); DISODIUM SALT (Na STRIPPED) | LINCOMYCIN      |
|-----------------------------|------------------|------------------------------------------------------------------|-----------------|
| Structure                   |                  |                                                                  |                 |
| Actual Endpoint (-log C)    | 3.977            | 1.861                                                            | 2.609           |
| Predicted Endpoint (-log C) | 2.58837          | 2.12291                                                          | 2.17881         |
| Distance                    | 0.626            | 0.660                                                            | 0.772           |
| Reference                   | TXAPA9 20;599;71 | YAKUD5 21;2117;79                                                | 85ERAY 1;186;78 |

## Model Applicability

Unknown features are fingerprint features in the query molecule, but not found in the training set.

1. OPS PC12 out of range. Value: 12.177. Training min, max, SD, explained variance: -7.2298, 11.676, 2.292, 0.0190.
2. Unknown ECFP\_2 feature: -483166673: [\*]C(=\*)[C@]1(O)C[\*][\*]C1([\*])[\*]
3. Unknown ECFP\_2 feature: -1049278438: [\*]C([\*])([\*])[C@H]1C[\*][\*]C1([\*])[\*]
4. Unknown ECFP\_2 feature: 1195714366: [\*]C([\*])C(C)(O)C([\*])[\*]
5. Unknown ECFP\_2 feature: 80071435: [\*]CC(O)C([\*])([\*])[\*]

## Feature Contribution

### Top features for positive contribution

| Fingerprint | Bit/Smiles | Feature Structure | Score |
|-------------|------------|-------------------|-------|
|             |            |                   |       |

| ECFP_6                                 | 642810091   | 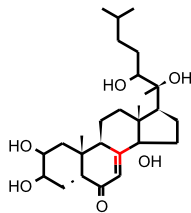<br><chem>[*][c](:[*]):[*]</chem>       | 0.281  |
|----------------------------------------|-------------|---------------------------------------------------------------------------------------------------------------------------|--------|
| ECFP_6                                 | 1035165602  | <br><chem>[*]CC(C)C</chem>             | 0.172  |
| ECFP_6                                 | -1074141656 | <br><chem>[*]=O</chem>                 | 0.142  |
| Top Features for negative contribution |             |                                                                                                                           |        |
| Fingerprint                            | Bit/Smiles  | Feature Structure                                                                                                         | Score  |
| ECFP_6                                 | 2106656448  | <br><chem>[*]C(=O)[*]</chem>         | -0.352 |
| ECFP_6                                 | 412256466   | <br><chem>[*]CCC([*])([*])[*]</chem> | -0.229 |

ECFP\_6

734603939

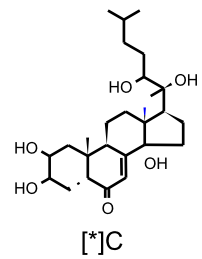

-0.201

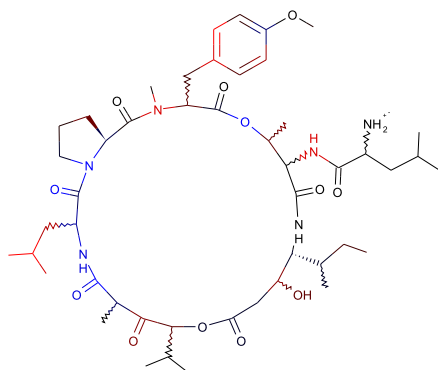

$C_{49}H_{79}N_6O_{12}$

Molecular Weight: 944.18455

ALogP: 3.176

Rotatable Bonds: 13

Acceptors: 12

Donors: 5

## Model Prediction

Prediction: 0.274

Unit: g/kg\_body\_weight

Mahalanobis Distance: 36.965

Mahalanobis Distance p-value: 1.49e-123

Mahalanobis Distance: The Mahalanobis distance (MD) is a generalization of the Euclidean distance that accounts for correlations among the X properties. It is calculated as the distance to the center of the training data. The larger the MD, the less trustworthy the prediction.

Mahalanobis Distance p-value: The p-value gives the fraction of training data with an MD greater than or equal to the one for the given sample, assuming normally distributed data. The smaller the p-value, the less trustworthy the prediction. For highly non-normal X properties (e.g., fingerprints), the MD p-value is wildly inaccurate.

## Structural Similar Compounds

| Name                        | NOVOBIOCIN; SODIUM SALT (Na STRIPPED) | SECALONIC ACID   | CLINDAMYCIN-2-PHOSPHATE |
|-----------------------------|---------------------------------------|------------------|-------------------------|
| Structure                   |                                       |                  |                         |
| Actual Endpoint (-log C)    | 2.243                                 | 4.463            | 2.44                    |
| Predicted Endpoint (-log C) | 2.88962                               | 3.37815          | 2.51896                 |
| Distance                    | 1.090                                 | 1.180            | 1.308                   |
| Reference                   | ARZNAD 8;386;58                       | TXAPA9 48;A14;79 | TXAPA9 27;308;74        |

## Model Applicability

Unknown features are fingerprint features in the query molecule, but not found in the training set.

1. Molecular\_Weight out of range. Value: 944.18. Training min, max, mean, SD: 27.025, 835.89, 220.91, 97.79.
2. Unknown ECFP\_2 feature: -591526139: [\*][NH2+][\*]
3. Unknown ECFP\_2 feature: 1352327988: [\*]C([\*])[NH2+]C
4. Unknown ECFP\_2 feature: -410102202: [\*]CC(N[\*])C(=[\*])[\*]
5. Unknown ECFP\_2 feature: 1691770380: [\*]NC(C([\*])[\*])C([\*])[\*]
6. Unknown ECFP\_2 feature: -714938792: [\*]C(=[\*])C(C)C(=[\*])[\*]
7. Unknown ECFP\_2 feature: 20550775: [\*]CC([NH2+][\*])C(=[\*])[\*]
8. Unknown ECFP\_2 feature: 866401773: [\*][NH2+]C
9. Unknown FCFP\_6 feature: 10: [\*][NH2+][\*]
10. Unknown FCFP\_6 feature: 16: [\*][c](:[\*]):[\*]
11. Unknown FCFP\_6 feature: 18028531: [\*]C([\*])[NH2+]C
12. Unknown FCFP\_6 feature: -1817836174: [\*]CC([NH2+][\*])C(=[\*])[\*]
13. Unknown FCFP\_6 feature: 1618154665: [\*][c](:[\*]):[cH]:[c]([\*]):[\*]
14. Unknown FCFP\_6 feature: 136418580: [\*][NH2+]C

## Feature Contribution

### Top features for positive contribution

| Fingerprint | Bit/Smiles | Feature Structure | Score |
|-------------|------------|-------------------|-------|
|             |            |                   |       |

|                                        |             |                                                                                                         |        |
|----------------------------------------|-------------|---------------------------------------------------------------------------------------------------------|--------|
| ECFP_6                                 | 642810091   | 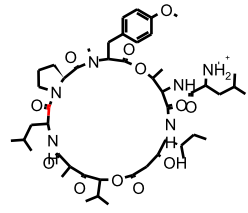<br>[*][c](:[*]):[*] | 0.281  |
| ECFP_6                                 | -1897341097 | <br>[*]N[*]          | 0.216  |
| ECFP_6                                 | 1035165602  | <br>[*]CC(C)C        | 0.172  |
| Top Features for negative contribution |             |                                                                                                         |        |
| Fingerprint                            | Bit/Smiles  | Feature Structure                                                                                       | Score  |
| ECFP_6                                 | 2106656448  | <br>[*]C(=O)[*]     | -0.352 |
| ECFP_6                                 | 683445015   | <br>[*]O[*]        | -0.266 |

ECFP\_6

-176455838

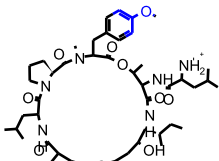

[\*]O[c](:[cH]:[\*]):[c  
H]:[\*]

-0.257

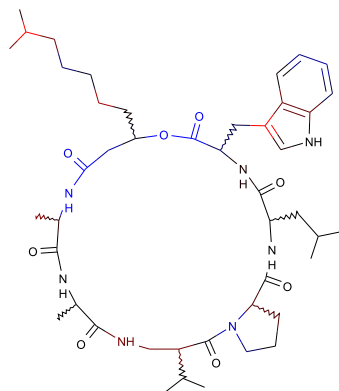

$C_{45}H_{69}N_7O_8$

Molecular Weight: 836.07145

ALogP: 4.986

Rotatable Bonds: 11

Acceptors: 8

Donors: 6

## Model Prediction

Prediction: 4.897

Unit: g/kg\_body\_weight

Mahalanobis Distance: 36.521

Mahalanobis Distance p-value: 2.08e-119

Mahalanobis Distance: The Mahalanobis distance (MD) is a generalization of the Euclidean distance that accounts for correlations among the X properties. It is calculated as the distance to the center of the training data. The larger the MD, the less trustworthy the prediction.

Mahalanobis Distance p-value: The p-value gives the fraction of training data with an MD greater than or equal to the one for the given sample, assuming normally distributed data. The smaller the p-value, the less trustworthy the prediction. For highly non-normal X properties (e.g., fingerprints), the MD p-value is wildly inaccurate.

## Structural Similar Compounds

| Name                        | NOVOBIOCIN; SODIUM SALT (Na STRIPPED) | SECALONIC ACID   | VIRIDICATUM TOXIN |
|-----------------------------|---------------------------------------|------------------|-------------------|
| Structure                   |                                       |                  |                   |
| Actual Endpoint (-log C)    | 2.243                                 | 4.463            | 3.666             |
| Predicted Endpoint (-log C) | 2.88962                               | 3.37815          | 3.0269            |
| Distance                    | 0.949                                 | 1.217            | 1.232             |
| Reference                   | ARZNAD 8;386;58                       | TXAPA9 48;A14;79 | TXAPA9 24;507;73  |

## Model Applicability

Unknown features are fingerprint features in the query molecule, but not found in the training set.

1. Molecular\_Weight out of range. Value: 836.07. Training min, max, mean, SD: 27.025, 835.89, 220.91, 97.79.
2. Unknown ECFP\_2 feature: -410102202: [\*]CC(N[\*])C(=[\*])[\*]
3. Unknown ECFP\_2 feature: 1863041499: [\*]NC(C)C(=[\*])[\*]
4. Unknown FCFP\_6 feature: 16: [\*][c](:[\*]):[\*]
5. Unknown FCFP\_6 feature: 19: [\*]:[nH]:[\*]
6. Unknown FCFP\_6 feature: 1618184456: [\*][c]1:[\*]:[\*]:[nH]:[cH]:1
7. Unknown FCFP\_6 feature: 307448885: [\*]:[cH]:[c]1:[nH]:[\*]:[\*]:[c]:1:[\*]
8. Unknown FCFP\_6 feature: 2005402822: [\*]:[c]1:[\*]:[\*]:[cH]:[nH]:1
9. Unknown FCFP\_6 feature: 1618154665: [\*][c](:[\*]):[cH]:[c]([\*]):[\*]

## Feature Contribution

### Top features for positive contribution

| Fingerprint | Bit/Smiles | Feature Structure | Score |
|-------------|------------|-------------------|-------|
|             |            |                   |       |



|                                        |             |                                                                                                                      |        |
|----------------------------------------|-------------|----------------------------------------------------------------------------------------------------------------------|--------|
| ECFP_6                                 | 642810091   | 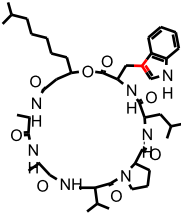<br><chem>[*][c](:[*]):[*]</chem> | 0.281  |
| ECFP_6                                 | 1035165602  | <br><chem>[*]CC(C)C</chem>        | 0.172  |
| ECFP_6                                 | -1074141656 | <br><chem>[*]=O</chem>            | 0.142  |
| Top Features for negative contribution |             |                                                                                                                      |        |
| Fingerprint                            | Bit/Smiles  | Feature Structure                                                                                                    | Score  |
| ECFP_6                                 | 2106656448  | <br><chem>[*]C(=O)[*]</chem>     | -0.352 |
| ECFP_6                                 | 683445015   | <br><chem>[*]O[*]</chem>        | -0.266 |

FCFP\_6

566058135

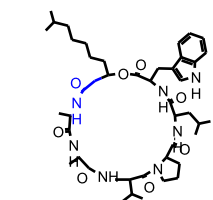

[\*]NC(=O)C([\*])([\*])

-0.216

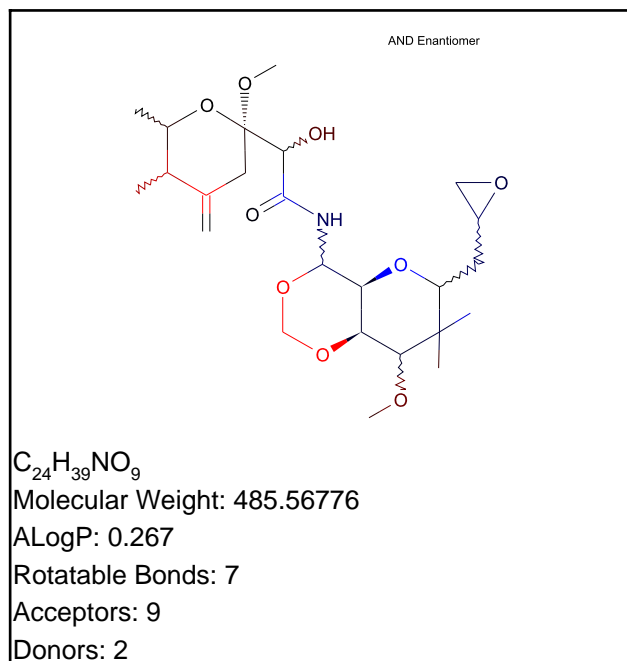

### Model Prediction

Prediction: 0.141

Unit: g/kg\_body\_weight

Mahalanobis Distance: 26.821

Mahalanobis Distance p-value: 4.68e-042

Mahalanobis Distance: The Mahalanobis distance (MD) is a generalization of the Euclidean distance that accounts for correlations among the X properties. It is calculated as the distance to the center of the training data. The larger the MD, the less trustworthy the prediction.

Mahalanobis Distance p-value: The p-value gives the fraction of training data with an MD greater than or equal to the one for the given sample, assuming normally distributed data. The smaller the p-value, the less trustworthy the prediction. For highly non-normal X properties (e.g., fingerprints), the MD p-value is wildly inaccurate.

### Structural Similar Compounds

| Name                        | INSARIOTOXIN                                                                        | LASIOCARPINE                                                                        | FLUOCINONID                                                                         |
|-----------------------------|-------------------------------------------------------------------------------------|-------------------------------------------------------------------------------------|-------------------------------------------------------------------------------------|
| Structure                   | 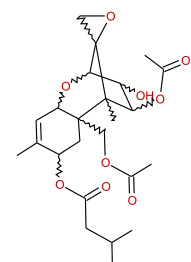 |  |  |
| Actual Endpoint (-log C)    | 5.238                                                                               | 3.573                                                                               | 4.548                                                                               |
| Predicted Endpoint (-log C) | 3.50309                                                                             | 2.86996                                                                             | 3.335                                                                               |
| Distance                    | 0.587                                                                               | 0.634                                                                               | 0.703                                                                               |
| Reference                   | DFSCDX 4;135;83                                                                     | TXAPA9 17;290;70                                                                    | NIIRDN 6;694;82                                                                     |

### Model Applicability

Unknown features are fingerprint features in the query molecule, but not found in the training set.

- OPS PC42 out of range. Value: 5.6955. Training min, max, SD, explained variance: -5.0672, 5.4639, 1.239, 0.0055.
- Unknown ECFP\_2 feature: -457637478: [\*]NC(O[\*])C([\*])[\*]
- Unknown ECFP\_2 feature: 837844420: [\*]CC(O[\*])(O[\*])C([\*])[\*]
- Unknown ECFP\_2 feature: 825070174: [\*]C(=[\*])C(O)C([\*])([\*])[\*]
- Unknown FCFP\_6 feature: 699559848: [\*]NC(O[\*])C([\*])[\*]
- Unknown FCFP\_6 feature: 1327594201: [\*]CC(O[\*])(O[\*])C([\*])[\*]

### Feature Contribution

#### Top features for positive contribution

| Fingerprint | Bit/Smiles | Feature Structure                                                                                  | Score |
|-------------|------------|----------------------------------------------------------------------------------------------------|-------|
| FCFP_6      | 470041467  | 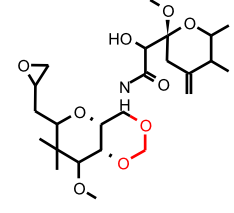<br>[*]OCO[*] | 0.322 |

|                                        |             |                                                                                                                          |        |
|----------------------------------------|-------------|--------------------------------------------------------------------------------------------------------------------------|--------|
| ECFP_6                                 | 642810091   | 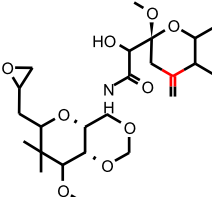<br><chem>[*][c](:[*]):[*]</chem>     | 0.281  |
| ECFP_6                                 | -1897341097 | <br><chem>[*]N[*]</chem>              | 0.216  |
| Top Features for negative contribution |             |                                                                                                                          |        |
| Fingerprint                            | Bit/Smiles  | Feature Structure                                                                                                        | Score  |
| ECFP_6                                 | 683445015   | <br><chem>[*]O[*]</chem>              | -0.266 |
| FCFP_6                                 | 566058135   | <br><chem>[*]NC(=O)C([*])[*]</chem> | -0.216 |
| ECFP_6                                 | 734603939   | <br><chem>[*]C</chem>               | -0.201 |



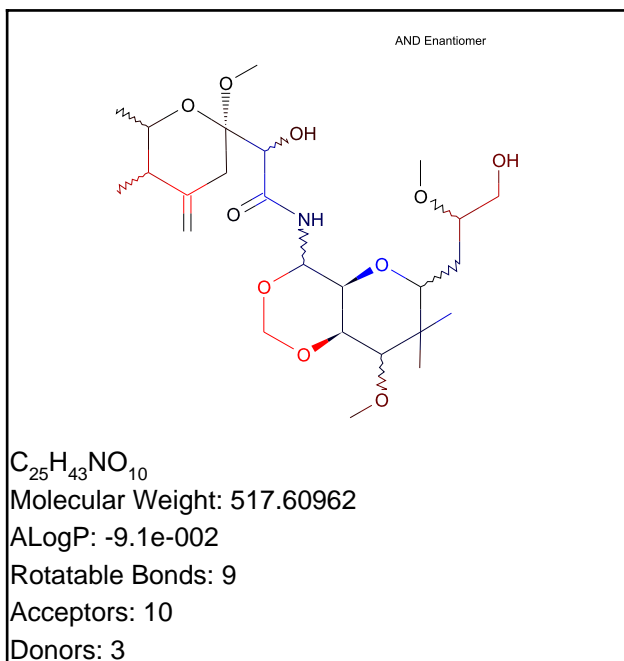

### Model Prediction

Prediction: 0.324

Unit: g/kg\_body\_weight

Mahalanobis Distance: 26.715

Mahalanobis Distance p-value: 2.21e-041

Mahalanobis Distance: The Mahalanobis distance (MD) is a generalization of the Euclidean distance that accounts for correlations among the X properties. It is calculated as the distance to the center of the training data. The larger the MD, the less trustworthy the prediction.

Mahalanobis Distance p-value: The p-value gives the fraction of training data with an MD greater than or equal to the one for the given sample, assuming normally distributed data. The smaller the p-value, the less trustworthy the prediction. For highly non-normal X properties (e.g., fingerprints), the MD p-value is wildly inaccurate.

### Structural Similar Compounds

| Name                        | INSARIOTOXIN                                                                        | LASIOCARPINE                                                                        | LENAMPICILLIN .HCI (HCI STRIPPED)                                                   |
|-----------------------------|-------------------------------------------------------------------------------------|-------------------------------------------------------------------------------------|-------------------------------------------------------------------------------------|
| Structure                   | 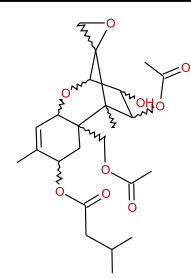 |  |  |
| Actual Endpoint (-log C)    | 5.238                                                                               | 3.573                                                                               | 1.664                                                                               |
| Predicted Endpoint (-log C) | 3.50309                                                                             | 2.86996                                                                             | 2.37593                                                                             |
| Distance                    | 0.755                                                                               | 0.755                                                                               | 0.782                                                                               |
| Reference                   | DFSCDX 4;135;83                                                                     | TXAPA9 17;290;70                                                                    | NKRZAZ 32(Suppl                                                                     |

### Model Applicability

Unknown features are fingerprint features in the query molecule, but not found in the training set.

1. OPS PC44 out of range. Value: 6.5592. Training min, max, SD, explained variance: -4.6697, 6.3674, 1.209, 0.0053.
2. Unknown ECFP\_2 feature: -457637478: [\*]NC(O[\*])C([\*])[\*]
3. Unknown ECFP\_2 feature: 837844420: [\*]CC(O[\*])(O[\*])C([\*])[\*]
4. Unknown ECFP\_2 feature: 825070174: [\*]C(=[\*])C(O)C([\*])([\*])[\*]
5. Unknown FCFP\_6 feature: 699559848: [\*]NC(O[\*])C([\*])[\*]
6. Unknown FCFP\_6 feature: 1327594201: [\*]CC(O[\*])(O[\*])C([\*])[\*]

### Feature Contribution

#### Top features for positive contribution

| Fingerprint | Bit/Smiles | Feature Structure                                                                                  | Score |
|-------------|------------|----------------------------------------------------------------------------------------------------|-------|
| FCFP_6      | 470041467  | 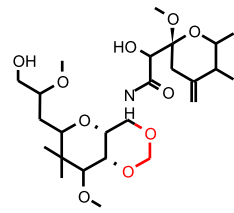<br>[*]OCO[*] | 0.322 |

|                                        |             |                                                                                                             |        |
|----------------------------------------|-------------|-------------------------------------------------------------------------------------------------------------|--------|
| ECFP_6                                 | 642810091   | 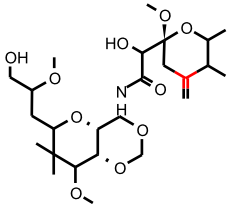<br>[*][c](:[*]):[*]     | 0.281  |
| ECFP_6                                 | -1897341097 | <br>[*]N[*]              | 0.216  |
| Top Features for negative contribution |             |                                                                                                             |        |
| Fingerprint                            | Bit/Smiles  | Feature Structure                                                                                           | Score  |
| ECFP_6                                 | 683445015   | <br>[*]O[*]              | -0.266 |
| FCFP_6                                 | 566058135   | <br>[*]NC(=O)C([*])[*] | -0.216 |
| ECFP_6                                 | 734603939   | <br>[*]C               | -0.201 |





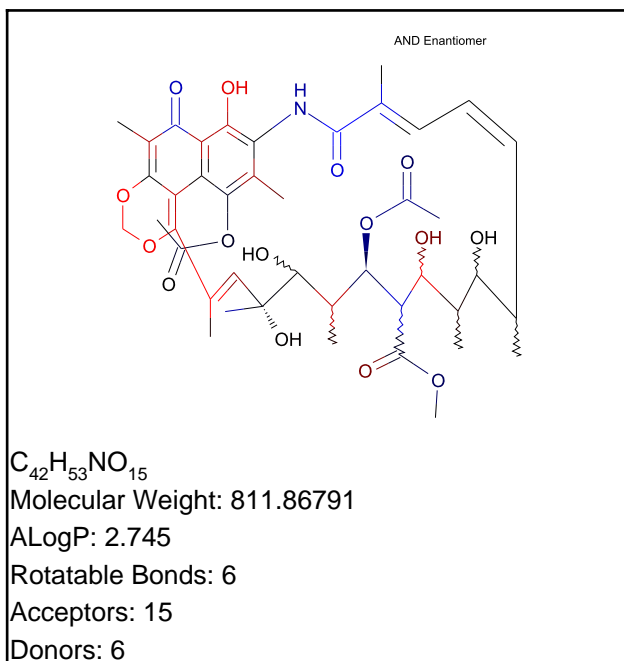

### Model Prediction

Prediction: 0.166

Unit: g/kg\_body\_weight

Mahalanobis Distance: 31.033

Mahalanobis Distance p-value: 3.78e-072

Mahalanobis Distance: The Mahalanobis distance (MD) is a generalization of the Euclidean distance that accounts for correlations among the X properties. It is calculated as the distance to the center of the training data. The larger the MD, the less trustworthy the prediction.

Mahalanobis Distance p-value: The p-value gives the fraction of training data with an MD greater than or equal to the one for the given sample, assuming normally distributed data. The smaller the p-value, the less trustworthy the prediction. For highly non-normal X properties (e.g., fingerprints), the MD p-value is wildly inaccurate.

### Structural Similar Compounds

| Name                        | SECALONIC ACID                                                                      | NOVOBIOCIN; SODIUM SALT (Na STRIPPED)                                               | NATAMYCIN                                                                           |
|-----------------------------|-------------------------------------------------------------------------------------|-------------------------------------------------------------------------------------|-------------------------------------------------------------------------------------|
| Structure                   | 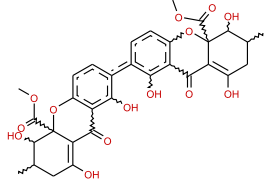 |  |  |
| Actual Endpoint (-log C)    | 4.463                                                                               | 2.243                                                                               | 2.387                                                                               |
| Predicted Endpoint (-log C) | 3.37815                                                                             | 2.88962                                                                             | 2.63572                                                                             |
| Distance                    | 0.761                                                                               | 1.028                                                                               | 1.075                                                                               |
| Reference                   | TXAPA9 48;A14;79                                                                    | ARZNAD 8;386;58                                                                     | TXAPA9 8;97;66                                                                      |

### Model Applicability

Unknown features are fingerprint features in the query molecule, but not found in the training set.

1. OPS PC22 out of range. Value: -6.4102. Training min, max, SD, explained variance: -5.4726, 10.66, 1.747, 0.0110.
2. Unknown ECFP\_2 feature: -40769921: [\*]C([\*])[C@](C)(O)C=[\*]
3. Unknown ECFP\_2 feature: 824611088: [\*]C([\*])C(C)C=[\*]
4. Unknown ECFP\_2 feature: 470857763: [\*]C(=CC=[\*])[\*]
5. Unknown FCFP\_6 feature: 16: [\*][c](:[\*]):[\*]
6. Unknown FCFP\_6 feature: -549108873: [\*]:[c](:[\*])O
7. Unknown FCFP\_6 feature: -1678275541: [\*]C(=C(C(=[\*])[\*])[c](:[\*]):[\*])[\*]
8. Unknown FCFP\_6 feature: 74595001: [\*][c](:[\*]):[c](O):[cH]:[\*]

### Feature Contribution

#### Top features for positive contribution

| Fingerprint | Bit/Smiles | Feature Structure | Score |
|-------------|------------|-------------------|-------|
|             |            |                   |       |

|                                        |            |                                                                                                                      |        |
|----------------------------------------|------------|----------------------------------------------------------------------------------------------------------------------|--------|
| FCFP_6                                 | 470041467  | 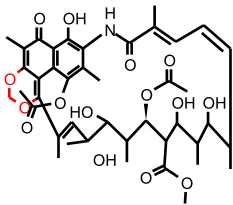<br>[*]OCO[*]                     | 0.322  |
| ECFP_6                                 | 642810091  | <br>[*][c](:[*]):[*]              | 0.281  |
| FCFP_6                                 | 436915834  | <br>[*]OC(=C([*])([*])C(=[*])[*]) | 0.184  |
| Top Features for negative contribution |            |                                                                                                                      |        |
| Fingerprint                            | Bit/Smiles | Feature Structure                                                                                                    | Score  |
| ECFP_6                                 | 2106656448 | <br>[*]C(=O)[*]                 | -0.352 |
| ECFP_6                                 | 683445015  | <br>[*]O[*]                     | -0.266 |

FCFP\_6

566058135

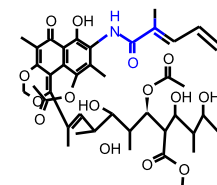

[\*]NC(=O)C([\*])[\*]

-0.216

# Simeprevir

# TOPKAT\_Rat\_Oral\_LD50

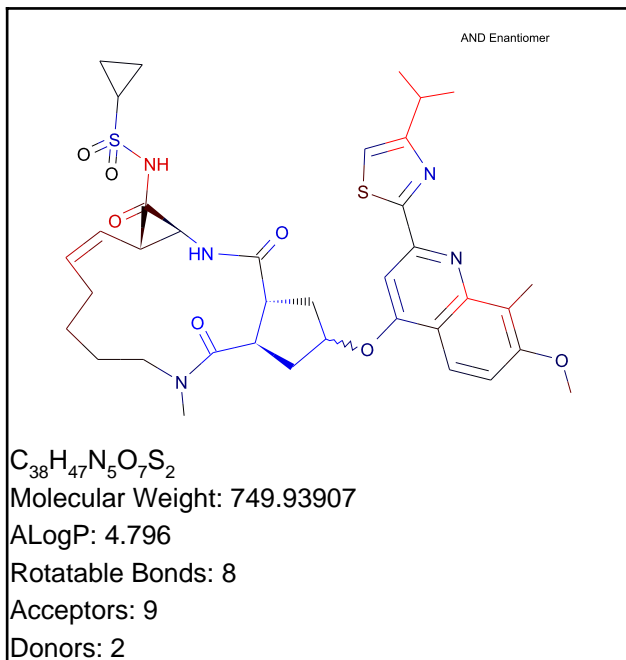

## Model Prediction

Prediction: 0.209

Unit: g/kg\_body\_weight

Mahalanobis Distance: 37.613

Mahalanobis Distance p-value: 1.1e-129

Mahalanobis Distance: The Mahalanobis distance (MD) is a generalization of the Euclidean distance that accounts for correlations among the X properties. It is calculated as the distance to the center of the training data. The larger the MD, the less trustworthy the prediction.

Mahalanobis Distance p-value: The p-value gives the fraction of training data with an MD greater than or equal to the one for the given sample, assuming normally distributed data. The smaller the p-value, the less trustworthy the prediction. For highly non-normal X properties (e.g., fingerprints), the MD p-value is wildly inaccurate.

## Structural Similar Compounds

| Name                        | ANAPREL                                                                             | RESERPINE                                                                           | PHOSPHOROTHIOIC ACID; O;O'-(SULFONYLDI-p-PHENYLENE) O;O;O';O'-TETRAMETHYL ESTER     |
|-----------------------------|-------------------------------------------------------------------------------------|-------------------------------------------------------------------------------------|-------------------------------------------------------------------------------------|
| Structure                   | 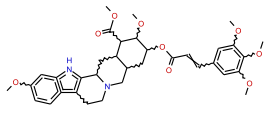 |  |  |
| Actual Endpoint (-log C)    | 2.803                                                                               | 3.161                                                                               | 2.397                                                                               |
| Predicted Endpoint (-log C) | 2.99154                                                                             | 2.72801                                                                             | 3.8515                                                                              |
| Distance                    | 1.032                                                                               | 1.042                                                                               | 1.057                                                                               |
| Reference                   | NIIRDN 6;898;82                                                                     | PSSCBG 11;555;80                                                                    | TXAPA9 21;315;72                                                                    |

## Model Applicability

Unknown features are fingerprint features in the query molecule, but not found in the training set.

- All properties and OPS components are within expected ranges.
- Unknown ECFP\_2 feature: -309676563: [\*]N[C@]1(C[C@H]1[\*])C(=[\*])[\*]
- Unknown ECFP\_2 feature: -1049290660: [\*]C1([\*])C[C@H]1C=[\*]
- Unknown ECFP\_2 feature: 2121941848: [\*]NS(=O)(=O)C1[\*][\*]1
- Unknown FCFP\_6 feature: 16: [\*][c](:[\*]):[\*]
- Unknown FCFP\_6 feature: 1747237384: [\*][c](:[\*]):n:[c](:[\*]):[\*]
- Unknown FCFP\_6 feature: 690511177: [\*]:[cH]:[c](:n:[\*])[c](:[\*]):[\*]
- Unknown FCFP\_6 feature: 1618154665: [\*][c](:[\*]):[cH]:[c]([\*]):[\*]
- Unknown FCFP\_6 feature: 690481386: [\*]:[c](:[\*])[c]1:n:[\*]:[\*]:s:1
- Unknown FCFP\_6 feature: 1018942292: [\*]NS(=O)(=O)C1[\*][\*]1

## Feature Contribution

### Top features for positive contribution

| Fingerprint | Bit/Smiles | Feature Structure | Score |
|-------------|------------|-------------------|-------|
|             |            |                   |       |

|                                        |             |                                                                                                                                                             |        |
|----------------------------------------|-------------|-------------------------------------------------------------------------------------------------------------------------------------------------------------|--------|
| FCFP_6                                 | 1186303932  | 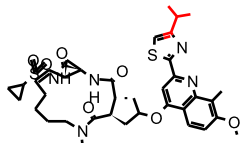<br><chem>[*]:[c](:[*])C(C)C</chem>                                      | 0.375  |
| ECFP_6                                 | 642810091   | <br><chem>[*][c](:[*]):[*]</chem>                                        | 0.281  |
| ECFP_6                                 | -1897341097 | <br><chem>[*]N[*]</chem>                                                 | 0.216  |
| Top Features for negative contribution |             |                                                                                                                                                             |        |
| Fingerprint                            | Bit/Smiles  | Feature Structure                                                                                                                                           | Score  |
| ECFP_6                                 | 2106656448  | <br><chem>[*]C(=O)[*]</chem>                                           | -0.352 |
| ECFP_6                                 | 2077607946  | <br><chem>[*]O[c]1:[cH]:[cH]:[c]           ](:[*]):[*]:[c]:1[*]</chem> | -0.252 |

ECFP\_6

655739385

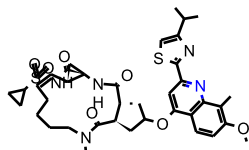

[\*]:n:[\*]

-0.239
